# Supplementary material
Source: publisher figshare collection journal article supplement (https://frontiersin.figshare.com/ndownloader/files/14800115)
Supplement: Supplementary file 1 [file 14800115]

## Sheet: Read me
SM 3. Supplementary material to the paper
Carbon dioxide emission and soil sequestration for the French agro-food system: present and prospective scenarios
byLe Noë, J., Billen, G., Garnier, J.,
This file provides the hypotheses, primary data collected to compute the GRAFS of French agricultural regions as well as the complete GRAFS file for the OS scenario in the period 2040-2050. The full methodology of GRAFS modelling has been provided by Le Noe et al., (2018) and Le Noe et al., (2019). The methodology for the development of the scenario and their computation has been explained in Bil…
worksheets 'hypo'	Present the main hypothesis made for the ARD scenario
worksheets 'pvar'	lists primary data and parameters used for the GRAFS calculation
	cells in red	parameters subject to uncertainty
	cells in blue	primary data subject to uncertainty
	cells in black	derived variables
	column F to AL	the basic value of the primary variable or parameter for each territory
	column D	the source of the primary variable or parameter for each territory
The information is provided separately for each year
worksheet 'GRAFS'	contains the basic GRAFS model calculation based on primary variables and parameters listed in 'pvar'
worksheet 'sources'	contains the main sources of the variables and parameters listed in 'pvar'

## Sheet: hypo
scenario Specialization/Opening																																							total France
starting point: average 2004-2014
1.	population 2040	INSEE projection (elevated estimate)			Ile de France	Eure	Eure-et-Loir	Picardie	Calvados-Orne	Seine Maritime	Manche	Nord Pas de Calais	Champ-Ard-Yonne	Bourgogne	Grande Lorraine	Alsace	Bretagne	Vendée-Charente	Loire aval	Loire Centrale	Loire Amont	Grand Jura	Savoie	Ain-Rhône	Alpes	Isère-Drôme Ardèche	Aveyron-Lozère	Garonne	Gironde	Pyrénées occid	Landes	Dor-Lot	Cantal-Corrèze	Grand Marseille	Côte d'Azur	Gard-Hérault	Pyrénées Orient
		total surface		ha	1196474	602970	593179	1951779	1174815	630405	599156	1245083	2693144	1505370	2905907	833166	2750667	1962351	3168430	4064566	5184336	1091832	1110910	904436	1264840	2000764	1394786	3880865	1020173	1219685	934684	1445022	1167654	883005	1032508	1209932	414118		54037012
		reference (2004-2014) sc
		Population		M hab	11.8345	0.585647	0.432109	1.94378	0.986917	1.27836	0.504547	4.13069	1.52802	0.724076	2.63045	1.85774	3.18379	1.59183	3.30666	2.57506	3.2702	0.939199	1.1394	2.31906	0.291553	1.99965	0.356823	2.84899	1.44487	0.885442	0.375517	0.58707	0.397014	2.52485	1.63493	1.73392	0.443626		62.2863
		population density		hab/km²	989.117	97.127	72.8463	99.5904	84.0061	202.784	84.2096	331.76	56.7374	48.0995	90.5209	222.974	115.746	81.1183	104.363	63.3538	63.0784	86.0205	102.565	256.409	23.0506	99.9441	25.5827	73.4113	141.629	72.5959	40.1759	40.627	34.001	285.939	158.346	143.307	107.126		115.266
		Spec/Open sc
		Population		M hab	13.77	0.71	0.5	2.16	1.11	1.35	0.55	4.4	1.61	0.78	2.82	2.17	4.1	2.08	4.2	3.03	3.66	1.08	1.52	2.93	0.38	2.64	0.43	3.91	1.9	1.07	0.52	0.72	0.44	3.01	2.58	2.33	0.59		75.05
		population density		hab/km²	1150.88	117.75	84.2916	110.668	94.483	214.148	91.7958	353.39	59.7814	51.8145	97.0437	260.452	149.055	105.995	132.558	74.5467	70.5973	98.9163	136.825	323.959	30.0433	131.95	30.8291	100.751	186.243	87.7276	55.6338	49.8262	37.6824	340.881	249.877	192.573	142.471		138.886
		% increase		%/34ans	16.3545	21.2335	15.7115	11.1235	12.4715	5.60403	9.00869	6.51983	5.36516	7.72357	7.20591	16.8083	28.7771	30.6676	27.0163	17.6673	11.9199	14.9916	33.403	26.3445	30.3365	32.0234	20.5078	37.2414	31.5001	20.8437	38.4756	22.643	10.8272	19.2148	57.8048	34.3775	32.9949		20.492
2.	human diet	carnivorous, without food waste reduction
3.	total agric land area	soil artificialization
		calculé à partir de la relation: Surf artif(ha/1000inhab)= 1475*DensPop^(-0.6)
		ref artificial surfaces		ha	278480	55465.6	48634.1	181347	101973	77844	52056.7	187206	199802	104542	259880	106862	271414	167964	299954	315148	401271	95672.8	104441	122671	65448.6	186162	75245	319173	109126	99863	60400.8	93797.8	70583.5	125102	115486	130035	39616.2
		scenar artificial surfaces			295875	59906.3	51557.5	189161	106882	79560.5	53884.2	191996	204023	107700	267215	113714	300309	186932	330064	336339	419759	101171	117202	134699	72765.7	208042	81074.4	362260	121758	107719	68800.6	101777	73546.4	134214	138604	146349	44402.5
		ref UAA		ha	589452	397958	457166	1349435	841375	407853	458140	833532	1.63934e+06	764535	1.42123e+06	323016	1.70247e+06	1.21978e+06	2171138	2.41672e+06	2955753	463549	256854	393761	407295	589663	788752	1.94253e+06	139917	661701	213544	569324	589907	194142	201170	218992	97248.8
		sc UAA		ha	572057	393517	454242	1.34162e+06	836467	406137	456313	828742	1.63512e+06	761377	1.41389e+06	316164	1.67357e+06	1.20081e+06	2.14103e+06	2.39553e+06	2.93726e+06	458051	244092	381733	399978	567783	782923	1.89944e+06	127285	653845	205144	561345	586944	185031	178052	202677	92462.6
4.	synthetic fertilizers	Adjusted for surplus<50 kgN/ha/yr (or zero if excess manure). Calculated with the attached Macro
5.	detailed crop production (line 182-217)	The overall cropland yield is determined based on total soil N inputs and the regional Ymax. It is distributed among the different crops based on their share in the current production of each regions.
					Ile de France	Eure	Eure-et-Loir	Picardie	Calvados-Orne	Seine Maritime	Manche	Nord Pas de Calais	Champ-Ard-Yonne	Bourgogne	Grande Lorraine	Alsace	Bretagne	Vendée-Charente	Loire aval	Loire Centrale	Loire Amont	Grand Jura	Savoie	Ain-Rhône	Alpes	Isère-Drôme Ardèche	Aveyron-Lozère	Garonne	Gironde	Pyrénées occid	Landes	Dor-Lot	Cantal-Corrèze	Grand Marseille	Côte d'Azur	Gard-Hérault	Pyrénées Orient
		cropland Ymax in the current situation		Ymax, kgN/ha/an	783.607	806.52	368.562	821.117	614.076	295.102	594.1	786.971	378.956	370.131	292.411	668.36	342.137	371.178	464.3	416.811	393.842	232.43	297.785	369.412	436.407	270.745	150.279	694.538	225.885	824.292	236.14	314.469	160.667	101.162	716.723	100.26	104.704					Production en N
																																										Ile de France	Eure	Eure-et-Loir	Picardie	Calvados-Orne	Seine Maritime	Manche	Nord Pas de Calais
					Ile de France	Eure	Eure-et-Loir	Picardie	Calvados-Orne	Seine Maritime	Manche	Nord Pas de Calais	Champ-Ard-Yonne	Bourgogne	Grande Lorraine	Alsace	Bretagne	Vendée-Charente	Loire aval	Loire Centrale	Loire Amont	Grand Jura	Savoie	Ain-Rhône	Alpes	Isère-Drôme Ardèche	Aveyron-Lozère	Garonne	Gironde	Pyrénées occid	Landes	Dor-Lot	Cantal-Corrèze	Grand Marseille	Côte d'Azur	Gard-Hérault	Pyrénées Orient					ktonN/yr
	Wheat	ktonDFW/yr			1604	1018.3	1591.96	4609.22	1286.18	943.299	275.135	2165	3581.83	1037.37	1750.09	310.216	2135.93	1811.28	2859.77	4818.07	1379.71	193.639	31.252	286.696	70.4492	352.948	70	2371.34	34.1019	54.6371	16.9642	195.577	38.7132	122.097	43.3878	175.644	2.55377		Wheat	kgN/100kgDFW	1.95	31.278	19.8568	31.0433	89.8798	25.0804	18.3943	5.36513	42.2175
	Rye	ktonDFW/yr			3.91637	0.336167	16.8249	4.00343	1.88063	0.317	0.054	0.854317	3.07063	4.93975	6.15998	0.714283	2.2505	2.8357	8.10665	27.1537	27.6881	5.3234	0.515917	2.98507	0.9211	5.34357	7.97995	1.55887	0.282	0.157367	0.4308	0.837183	4.61757	0.385017	0.0694333	0.0713333	0.3745		Rye	kgN/100kgDFW	1.76	0.0689281	0.00591653	0.296118	0.0704604	0.0330991	0.0055792	0.0009504	0.015036
	Barley	ktonDFW/yr			506.499	202.484	470.702	854.508	238.9	225.063	38.5004	458.897	2106.99	745.972	1130.89	30.726	474.334	347.248	377.619	1471.16	479.802	97.5169	17.7427	78.3398	26.3455	110.8	145.299	322.599	5.80908	12.3888	3.19595	84.1272	11.6934	6.80418	1.99198	12.4193	0.204167		Barley	kgN/100kgDFW	1.76	8.91438	3.56372	8.28435	15.0393	4.20464	3.96111	0.677607	8.07659
	Oat	ktonDFW/yr			16.1763	4.87917	7.50528	22.8424	38.3449	5.34623	2.6794	16.0242	29.5786	17.7838	22.0094	2.72993	57.3634	12.0127	37.5124	50.8122	37.5003	4.50393	0.511133	5.08042	3.16607	5.09022	9.14073	20.0419	1.2519	1.03983	0.561217	7.1659	1.8632	0.425867	0.200483	1.05112	0.281		Oat	kgN/100kgDFW	2.08	0.336467	0.101487	0.15611	0.475122	0.797573	0.111202	0.0557315	0.333303
	Grain maize	ktonDFW/yr			352.863	50.3254	252.694	441.338	90.7683	36.2726	66.5977	196.129	490.293	132.448	271.446	1468.67	1184.91	1385.63	1013.42	1437.11	714.719	166.552	81.0626	585.889	20.4663	510.02	11.2493	1613.97	309.184	1153.8	1213.73	285.878	20.045	19.2865	9.55243	8.41633	0.460167		Grain maize	kgN/100kgDFW	1.52	5.36352	0.764946	3.84094	6.70833	1.37968	0.551343	1.01229	2.98116
	Rice	ktonDFW/yr			0	0	0	0	0	0	0	0	0	0	0	0	0	0	0	0	0	0	0	0	0	0	0	1.11833	0	0	0	0	0	76.356	62.356	26.5458	0		Rice	kgN/100kgDFW	1.07	0	0	0	0	0	0	0	0
	Other cereals	ktonDFW/yr			10.8831	3.89127	10.6374	13.2315	46.1886	7.40965	16.2372	14.4382	33.419	45.6412	87.5035	13.55	357.066	109.425	339.702	261.51	450.239	29.0674	8.85637	46.3836	13.7848	69.7705	123.042	262.093	6.95533	27.9724	10.5148	81.7886	51.2628	6.18895	3.29448	9.66718	0.843917		Other cereals	kgN/100kgDFW	1.8	0.195896	0.0700428	0.191473	0.238168	0.831394	0.133374	0.292269	0.259888
	Straw	ktonDFW/yr			106.633	202.83	107.489	926.448	894.647	419.403	206.87	859.382	1019.78	657.385	1194.5	121.031	2163.91	1047.15	2025.08	1369.25	1219.52	194.381	47.838	209.153	49.2594	237.618	282.844	704.017	21.5242	58.0066	18.3636	187.825	79.7267	12.5754	9.3938	39.2098	2.78533		Straw	kgN/100kgDFW	0.5	0.533165	1.01415	0.537444	4.63224	4.47323	2.09702	1.03435	4.29691
	Rapeseed	ktonDFW/yr			223.2	207.172	324.441	352.205	124.534	78.4215	27.8178	193.461	636.971	340.34	423.703	32.6946	114.197	147.116	357.066	726.206	148.293	23.2556	5.75675	22.4341	6.84918	21.8981	26.6772	110.31	2.539	4.3503	2.8578	10.9546	0.442167	2.13123	1.4095	2.2746	0		Rapeseed	kgN/100kgDFW	3.5	7.812	7.25103	11.3555	12.3272	4.35869	2.74475	0.973621	6.77112
	Sunflower	ktonDFW/yr			8.54125	0.6871	2.49052	2.46033	2.50885	0.0794	0	12.3411	54.2654	30.0022	14.3928	1.17525	40.3002	229.266	152.681	250.869	52.8144	8.00432	3.48047	12.8416	9.22703	28.7383	96.9481	456.215	8.62833	4.99245	10.362	31.3904	1.59142	9.94067	5.65853	5.608	0.01		Sunflower	kgN/100kgDFW	1.96	0.167408	0.0134672	0.0488141	0.0482225	0.0491735	0.00155624	0	0.241885
	Soybean	ktonDFW/yr			0.0986333	0.0133333	0.0256667	0.0289833	0	0	0	0.0548333	1.93668	8.13472	3.50315	2.80287	0.0856667	0.568317	0.56905	3.00257	9.74027	7.05722	1.63285	5.31162	1.46747	4.51848	7.86738	67.2443	1.03167	2.66302	1.6156	1.33052	0.0218667	0.106517	0.100517	0.0320167	0		Soybean	kgN/100kgDFW	6	0.005918	0.0008	0.00154	0.001739	0	0	0	0.00329
	Other oil crops	ktonDFW/yr			1.01225	1.15817	1.93547	2.77688	0.349017	0.106	0.0217167	0.46395	2.8615	4.15258	0.789567	0.2463	2.90575	3.02098	4.68597	6.32945	0.7909	0.0260833	0	0.02725	0.0484	0.019	0.520567	0.869683	0.07615	0.0286	0.0743833	0.106917	0.0141	0.0294667	0.0146667	0.00546667	0.001		Other oil crops	kgN/100kgDFW	3.5	0.0354288	0.0405358	0.0677413	0.0971909	0.0122156	0.00371	0.000760083	0.0162382
	Horse beans and faba beans	ktonDFW/yr			66.6398	13.3299	3.6095	103.199	16.6179	16.2016	0.803233	27.067	30.2227	2.59123	4.83833	0.1465	5.50025	4.184	9.1592	11.5665	2.17042	0.54865	0.0117167	0.169583	0.225417	0.241717	0.0355667	12.7614	0.284167	0.490367	0.151667	1.01553	0.0184167	0.2029	0.04135	0.0751	0.0041		Horse beans and faba beans	kgN/100kgDFW	3.5	2.33239	0.466546	0.126333	3.61198	0.581625	0.567057	0.0281132	0.947346
	Peas	ktonDFW/yr			83.0241	46.2705	66.3642	158.522	44.7982	19.0402	1.23058	32.012	138.756	17.922	19.2745	0.466767	19.7087	42.3299	46.9921	78.9783	12.3235	0.5241	0.287517	2.36858	2.60972	6.96825	0.366883	31.8147	0.52885	0.44305	0.502033	0.928083	0.0829167	1.02718	0.512367	1.25277	0.03775		Peas	kgN/100kgDFW	3.6	2.98887	1.66574	2.38911	5.70679	1.61273	0.685447	0.044301	1.15243
	Other protein crops	ktonDFW/yr			0.3128	0.104167	0.565067	0.134367	0.218583	0.0818333	0.0794167	0.005	0.0443333	0.0254167	0.129	0.04465	1.80373	1.28765	3.75332	2.85663	0.6291	0.0861667	0.0085	0.2005	0.00416667	0.132867	0.0332667	0.32025	0.0454667	0.304517	0.0443333	0.24905	0.01225	0	0	0.00158333	0		Other protein crops	kgN/100kgDFW	3.6	0.0112608	0.00375	0.0203424	0.0048372	0.007869	0.002946	0.002859	0.00018
	Sugar beet	ktonDFW/yr			2876.45	708.989	627.525	11286.5	685.555	921.54	2.54572	4211.77	7401.13	102.26	7.29032	513.999	2.86667	1.46083	40.9568	1631.74	380.1	24.5712	0	0	0	0	0	1.91047	0.218867	0	2.08447	1.57547	0	0	0	0	0		Sugar beet	kgN/100kgDFW	0.208	5.98302	1.4747	1.30525	23.4758	1.42595	1.9168	0.00529509	8.76049
	Potatoes	ktonDFW/yr			153.045	105.934	326.079	2022.4	36.2361	388.874	14.3606	1966.04	835.08	24.0013	15.6838	49.7064	303.808	28.5408	14.7995	182.031	34.7412	1.77648	9.13757	21.1429	6.62125	14.5863	5.31737	30.3397	16.5971	1.18988	15.1534	2.34422	2.03292	16.8733	9.32862	15.474	6.08873		Potatoes	kgN/100kgDFW	0.256	0.391796	0.271192	0.834762	5.17735	0.0927644	0.995517	0.0367631	5.03307
	Other roots	ktonDFW/yr			1.66667e-10	1.66667e-10	1.66667e-10	1.66667e-10	1.66667e-10	1.66667e-10	1.66667e-10	1.66667e-10	1.66667e-10	1.66667e-10	1.66667e-10	1.66667e-10	1.66667e-10	1.66667e-10	1.66667e-10	1.66667e-10	1.66667e-10	1.66667e-10	1.66667e-10	1.66667e-10	1.66667e-10	1.66667e-10	1.66667e-10	1.66667e-10	1.66667e-10	1.66667e-10	1.66667e-10	1.66667e-10	1.66667e-10	1.66667e-10	1.66667e-10	1.66667e-10	1.66667e-10		Other roots	kgN/100kgDFW	0.23	3.83333e-13	3.83333e-13	3.83333e-13	3.83333e-13	3.83333e-13	3.83333e-13	3.83333e-13	3.83333e-13
	Green peas	ktonDFW/yr			0.480967	0.0499	5.95585	49.9505	0.0338667	0.0179333	0.0582167	95.8003	0.532967	1.0793	0.0306833	0.04505	61.3116	1.70937	0.4025	1.8285	1.72513	1.86385	0.0164	0.2048	0.0092	0.19615	0.00278333	2.39582	0.628683	0.72295	4.38142	0.10725	0.00715	0.14115	0.129433	0.231867	0.0209		Green peas	kgN/100kgDFW	0.5	0.00240483	0.0002495	0.0297793	0.249753	0.000169333	8.96667e-05	0.000291083	0.479002
	Dry beans	ktonDFW/yr			1.23973	0.0864	2.76325	8.64235	0.00951667	0.01705	0.0172	4.60575	0.449317	0.0843333	0.00393333	0.0096	18.1518	0.719917	0.46475	0.519567	0.325467	0.3247	0	0.0125333	0.00315	0.0620833	0	0.226467	0.46525	0.678617	0.280167	0.0195	0.00511667	0.130183	0.0878833	0.0792833	0.0082		Dry beans	kgN/100kgDFW	1.5	0.018596	0.001296	0.0414487	0.129635	0.00014275	0.00025575	0.000258	0.0690862
	Green beans	ktonDFW/yr			4.96893	0.210917	7.74718	52.4293	0.117517	0.153317	0.333217	55.4266	0.138483	2.22973	0.1539	0.285717	102.793	3.49958	6.18088	3.91585	3.22587	3.37775	0.314633	1.057	0.07555	0.401367	0.0291333	8.21728	23.6042	10.1782	41.2342	0.751933	0.08835	1.03235	0.859483	0.526817	0.085		Green beans	kgN/100kgDFW	0.5	0.0248447	0.00105458	0.0387359	0.262147	0.000587583	0.000766583	0.00166608	0.277133
	Dry vegetables	ktonDFW/yr			0.1789	0.0157667	0.459	0.148183	0	0	0.000666667	1.32408	3.95727	0.199033	0.0528167	0.0015	0	2.66733	0.547	5.93945	3.64493	0	0	0.0013	0.0608667	0.155167	0.0364	3.40648	0.00598333	0.187833	0.0552833	0.0234833	0.0442667	0.0169	0	2.34188	0.00633333		Dry vegetables	kgN/100kgDFW	3.6	0.0064404	0.0005676	0.016524	0.0053346	0	0	2.4e-05	0.047667
	Dry fruits	ktonDFW/yr			0.0844667	0.0163167	0	0.0009	0.0433333	0	0.0049	0.00085	0.07645	0	0.0323333	0.0297667	0.0109667	1.99867	0.526833	0.466833	0.353233	0.01035	0.1232	0.0271333	0.179183	21.6457	0.511317	7.0814	0.4473	0.277383	0.0854667	12.6915	1.77938	0.2846	0.1025	0.581433	0.0887833		Dry fruits	kgN/100kgDFW	2	0.00168933	0.000326333	0	1.8e-05	0.000866667	0	9.8e-05	1.7e-05
	Squash and melons	ktonDFW/yr			7.17207	0.8805	0.632033	1.37668	0.483483	2.32992	1.25287	16.0643	13.9476	2.346	12.7788	3.601	18.4663	34.5834	60.5274	70.6675	3.0659	0.2859	2.52048	9.26073	17.4868	20.1524	0.07555	97.8405	4.41837	2.90072	1.54852	11.5177	0.525233	141.295	44.3398	74.743	14.4061		Squash and melons	kgN/100kgDFW	0.18	0.0129097	0.0015849	0.00113766	0.00247803	0.00087027	0.00419385	0.00225516	0.0289157
	Cabbage	ktonDFW/yr			6.89145	1.21258	0.666533	1.2117	2.43317	2.73432	30.9895	75.6434	14.3624	2.09997	0.64	54.0062	319.232	4.89492	12.0871	4.92035	1.93238	0.452	0.896767	7.44758	0.264217	2.87513	0.108367	8.55092	0.294333	1.91152	0.572833	0.228167	0.0922667	9.12162	8.00623	1.15705	0.41605		Cabbage	kgN/100kgDFW	0.36	0.0248092	0.0043653	0.00239952	0.00436212	0.0087594	0.00984354	0.111562	0.272316
	Leaves vegetables	ktonDFW/yr			41.0576	3.40717	3.38453	212.329	10.6371	7.51777	48.9924	408.57	24.9972	5.7193	1.98217	8.86677	147.915	14.5997	90.6124	38.8021	12.9626	0.695983	4.71177	47.0963	6.17747	13.0325	0.54955	38.9748	7.73332	3.65888	4.59718	2.6525	0.645867	107.619	71.5806	26.0382	53.907		Leaves vegetables	kgN/100kgDFW	0.22	0.0903267	0.00749577	0.00744597	0.467123	0.0234015	0.0165391	0.107783	0.898855
	Fruits	ktonDFW/yr			15.4141	28.9465	8.58815	55.0735	94.5427	22.0461	23.6027	21.4407	14.9007	2.01942	23.2618	24.2467	63.3505	37.2042	375.692	132.923	57.4805	0.78775	25.512	38.2274	172.402	225.684	1.86347	585.169	25.5497	14.7258	16.9342	104.865	62.5912	443.005	207.95	204.514	111.402		Fruits	kgN/100kgDFW	0.1	0.0154141	0.0289465	0.00858815	0.0550735	0.0945428	0.0220461	0.0236027	0.0214407
	Olives	ktonDFW/yr			0	0	0	0	0	0	0	0	0	0	0	0	0	0.00165	0	0	0	0	0	0	1.76442	2.10673	0	0.94905	0	0	0	0	0	10.9663	10.4051	6.92152	0.663333		Olives	kgN/100kgDFW	0.67	0	0	0	0	0	0	0	0
	Citrus	ktonDFW/yr			0	0	0	0	0	0	0	0	0	0	0	0	0	0	0	0	0	0	0	0	0	0	0	0	0	0	0	0	0	0	0.2269	0	0		Citrus	kgN/100kgDFW	0.18	0	0	0	0	0	0	0	0
	Hemp	ktonDFW/yr			2.24553	0.974633	0.0819167	0	0.4598	0.0089	0	0	31.2303	1.87558	4.8735	0.04	0.66765	1.10085	10.1459	0.833017	0.1235	1.28275	0	0	0	0.0732667	0.02775	5.3171	0	0.77175	0	0.3095	0.0105	0	0	0.0491	0		Hemp	kgN/100kgDFW	0.35	0.00785937	0.00341122	0.000286708	0	0.0016093	3.115e-05	0	0
	Flax	ktonDFW/yr			10.9494	94.158	2.22332	65.0515	43.3099	155.665	0.0134	80.6165	2.82583	0.0246667	0.1	0	0.03035	0	0	0.17565	0	0	0	0	0	0	0.02	0.21	0	0	0	0.0074	0	0	0	0	0		Flax	kgN/100kgDFW	0.35	0.0383228	0.329553	0.00778161	0.22768	0.151585	0.544827	4.69e-05	0.282158
	Forage maize	ktonDFW/yr			27.6328	124.796	38.2632	697.447	1203.4	551.075	1154	1009.89	342.827	263.728	1057.86	187.012	4134.23	1067.99	2984.18	405.719	942.257	110.713	40.3657	265.405	13.8285	155.868	187.056	443.549	46.7925	426.131	92.8608	243.05	108.506	10.2564	9.19245	3.57748	1.60588		Forage maize	kgN/100kgDFW	1	0.276328	1.24796	0.382632	6.97447	12.034	5.51075	11.54	10.0989
	Forage cabbages	ktonDFW/yr			3.28099	2.18123	2.52987	7.54167	4.76909	2.30573	2.55424	4.66358	9.36636	4.35504	7.96122	1.88659	9.5403	7.27749	12.4197	13.6239	16.6656	2.59876	1.47534	2.32089	2.29804	3.70583	4.31817	11.6486	1.51732	3.68817	1.21491	3.38825	3.33101	1.55009	1.24055	2.12891	0.744839		Forage cabbages	kgN/100kgDFW	0.36	0.0118116	0.00785241	0.00910752	0.02715	0.0171687	0.00830063	0.00919526	0.0167889
	Alfalfa and clover	ktonDFW/yr			18.2292	29.9113	6.87127	59.8178	16.3866	4.51997	11.4881	14.0132	755.151	77.4389	68.9842	12.8649	41.813	124.061	140.515	131.352	154.671	16.5601	12.8854	31.9743	102.438	139.474	108.087	313.928	6.72442	17.9854	1.31278	91.4071	9.12063	34.7642	26.8205	27.3444	2.38713		Alfalfa and clover	kgN/100kgDFW	2.8	0.510418	0.837517	0.192395	1.6749	0.458826	0.126559	0.321667	0.392369
	Non-legume temporary meadow	ktonDFW/yr			27.1139	54.172	31.9665	111.987	417.893	171.515	597.404	121.261	144.924	163.078	423.609	85.3061	3926.3	1660.42	3782.82	1520.12	3298.97	427.166	144.092	356.127	110.857	204.548	1517.7	1287.31	42.8908	733.885	98.8236	686.38	652.494	20.7523	10.0978	31.6128	1.38025		Non-legme temporary meadow	kgN/100kgDFW	1.25	0.338924	0.67715	0.399581	1.39983	5.22367	2.14393	7.46755	1.51576
	Natural meadow	ktonDFW/yr			197.664	478.607	87.6305	1286.64	2256.54	1056.62	2037.65	1235.07	1492.46	1359.24	3849.34	461.527	970.674	1175.14	2696.53	1674.97	9128.32	1567	776.095	893.718	263.302	869.246	1299.96	1420.46	279.192	1290.8	59.8664	1090.56	2141.8	136.486	167.413	95.2347	50.7013		Natural meadow	kgN/100kgDFW	2.05	4.05212	9.81145	1.79643	26.3761	46.2591	21.6608	41.7718	25.3189
	total cropland				6180.24	2907.72	3922.98	22122.8	5302.24	3981.36	2523.64	12063.3	17725.9	3697.24	6554.53	2927.12	15710.8	8136.09	14769	14660.4	9448.19	1322.95	441.008	2038.19	639.289	2158.67	2607.71	8823.29	570.13	2540.17	1560.5	2050.49	1051.38	1055.37	538.351	679.596	200.766					67.7995	39.7142	61.6369	178.975	62.9573	40.5599	29.116	95.5068
6.	natural meadows	Permanent grassland production calculated from total N input and grassland Ymax, considering the same symbiotic N fxation and the same rate of industrial fertilization per ha as currently.
		zero grassland area in regions specialized in crop production			Ile de France	Eure	Eure-et-Loir	Picardie	Calvados-Orne	Seine Maritime	Manche	Nord Pas de Calais	Champ-Ard-Yonne	Bourgogne	Grande Lorraine	Alsace	Bretagne	Vendée-Charente	Loire aval	Loire Centrale	Loire Amont	Grand Jura	Savoie	Ain-Rhône	Alpes	Isère-Drôme Ardèche	Aveyron-Lozère	Garonne	Gironde	Pyrénées occid	Landes	Dor-Lot	Cantal-Corrèze	Grand Marseille	Côte d'Azur	Gard-Hérault	Pyrénées Orient
		symbiotic N fixation on grassland		Nfixha, kgN/ha/yr	40.9863	42.0064	27.8842	54.5348	40.7576	58.5603	55.764	52.4961	32.0818	31.7489	36.3359	38.3216	38.4135	41.0252	36.9371	31.4532	34.4234	29.9799	20.2397	35.4357	13.2223	20.8889	21.6445	23.4147	25.3095	26.2533	27.0022	26.0073	32.7647	13.0714	8.82595	9.60766	5.66126
		current grassland Ymax		Ymax, kgN/ha/yr	503.371	422.283	298.121	877.947	430.582	770.595	815.124	374.786	598.126	700.319	859.929	837.454	244.719	492.935	307.404	662.56	616.646	668.96	721.45	590.429	182.718	223.034	243.07	288.407	481.042	180.219	147.85	480.305	682.26	65.3637	118.766	47.951	29.6664
	N2 fixing grassland			ktonN/yr	1.48915	3.60571	0.660187	9.69323	17.0002	7.96034	13.9374	9.30468	8.28712	7.91044	22.6012	3.16417	7.31281	8.8532	20.315	11.3006	62.1534	9.0405	4.29424	6.17767	4.14356	6.54868	9.79358	10.7014	1.50675	9.72454	0.451018	7.53798	15.0675	1.13006	1.26125	1.13006	0.489694
	permanent Grassland area	current situation		ha	36333	85837	23676	177744	417105	135934	249936	177245	258312	249156	622009	82569	190371	215799	549989	359284	1805556	301552	212169	174335	313378	313501	452475	457037	59533	370412	16703	289841	459870	86453	142902	117621	86499	9491136
		sc grassland area corr urba		ha	0	1e-05	0	0	414672	135362	248939	0	0	0	618799	0	187140	212443	542362	0	1.79426e+06	297975	201628	169010	307748	301868	449131	446900	0	366014	0	285779	457560	0	0	0	0	7.43759e+06	314.342
		sc grassland avec tendance reduction			0	6.75595e-06	0	0	184019	64783	121181	0	0	0	394553	0	156188	173971	351312	0	1.48589e+06	329232	225911	181873	259385	263988	410276	364214	0	297637	0	223174	415584	0	0	0	0		8.04739e+06
		obs grassland reduction (2004-2014)		yr-1	0.0134272	0.00891275	0.0148035	0.00932781	0.0184648	0.0167479	0.0163619	0.00655699	0.0104751	0.00353346	0.0102279	-0.00244751	0.00410898	0.00454065	0.00986951	0.000315985	0.00428596	-0.00226707	-0.00258447	-0.00166707	0.00388561	0.0030474	0.00205647	0.0046498	-0.0109353	0.0046999	0.00757975	0.0056197	0.00218691	-0.00493422	0.0108368	-0.00339325	-0.00928764
7.	livestock number and excretion
		Livestock number is zero in specialized crop farming regions. In livestock breeding regions, LU is set to the maximum allowed by EC regulation, corresponding to an excretion 180 kgN/ha UAA/yr (ie. 2.1 LU/ha UAA).
		The distribution of total LU among the various species mimics their current proportions in each livestock breeding regions.
					Ile de France	Eure	Eure-et-Loir	Picardie	Calvados-Orne	Seine Maritime	Manche	Nord Pas de Calais	Champ-Ard-Yonne	Bourgogne	Grande Lorraine	Alsace	Bretagne	Vendée-Charente	Loire aval	Loire Centrale	Loire Amont	Grand Jura	Savoie	Ain-Rhône	Alpes	Isère-Drôme Ardèche	Aveyron-Lozère	Garonne	Gironde	Pyrénées occid	Landes	Dor-Lot	Cantal-Corrèze	Grand Marseille	Côte d'Azur	Gard-Hérault	Pyrénées Orient
	Milking cows	% total LU		fraction	0.146752	0.274675	0.160868	0.330863	0.349879	0.33552	0.459216	0.362258	0.218272	0.201984	0.316392	0.324116	0.27432	0.184601	0.261028	0.122079	0.128993	0.533715	0.546529	0.331068	0.0755499	0.218197	0.133522	0.151159	0.17927	0.138133	0.137664	0.15408	0.159901	0.00899706	0.0272487	0.0117702	0.0486897
	Suckler cows	% total LU			0.123098	0.183044	0.161543	0.170244	0.163471	0.157768	0.0803064	0.13872	0.262255	0.318855	0.203284	0.116049	0.0444144	0.276265	0.198503	0.342023	0.44794	0.059695	0.0525558	0.145239	0.104521	0.156472	0.350072	0.359227	0.307797	0.339833	0.193144	0.341561	0.483091	0.0736312	0.0251578	0.156781	0.386547		type 1	type 2
	Heifer for milking herd renewal over 2 yrs old	% total LU			0.0159363	0.0419363	0.0212547	0.0417554	0.0494059	0.0533816	0.0608588	0.0439825	0.0323422	0.0311425	0.0464976	0.0436802	0.0241575	0.0183142	0.0296286	0.0128621	0.0130189	0.0823095	0.0699978	0.0384774	0.0205413	0.0279768	0.0120862	0.0145902	0.0179681	0.0118036	0.00977844	0.0146262	0.0159582	0.000482285	0.0024595	0.00114334	0.00525813
	Heifer for suckler cows renewal over 2 yrs old	% total LU			0.019055	0.0295423	0.0260883	0.025966	0.0251324	0.0280818	0.014153	0.0213784	0.0386506	0.0457856	0.0299616	0.0158067	0.00619243	0.0459821	0.0335248	0.0424593	0.0482551	0.0072091	0.00640684	0.0201282	0.0153106	0.0210033	0.0306721	0.0444472	0.0427392	0.0535458	0.0314739	0.0341652	0.0431525	0.0121709	0.00291332	0.020057	0.0405248
	Heifer for slaughter over 2 yrs old	% total LU			0.0075546	0.0125865	0.0109288	0.0108684	0.0141306	0.0110907	0.00908401	0.0106838	0.0133116	0.0165103	0.0114971	0.00904806	0.00433788	0.0135133	0.0098301	0.0141764	0.0178101	0.00955287	0.00808284	0.0164081	0.00757987	0.0149595	0.00418865	0.00468911	0.0142114	0.00392838	0.0073144	0.00724159	0.00421604	0.00557829	0.000952197	0.00958163	0.00496601
	Males of milking type over 2 yrs old	% total LU			0.00127071	0.0266555	0.00275043	0.0218915	0.0222383	0.0466761	0.0248994	0.0164823	0.0325582	0.0148017	0.0176404	0.00387003	0.00344546	0.00162702	0.00717825	0.000915421	0.00114314	0.00707388	0.00490492	0.00215258	0.000986478	0.00240792	0.000652926	0.0013591	0.00119946	0.000501052	0.00151876	0.00271068	0.000893045	0.000334786	0.00128967	0.000370961	0.000456677
	Males of butcher type over 2 yrs old	% total LU			0.00883718	0.0263936	0.0124443	0.0156755	0.0220992	0.0271109	0.0133774	0.0141516	0.0233851	0.0186753	0.0134415	0.00731313	0.00383005	0.0112434	0.0129821	0.0166788	0.0224191	0.0057305	0.00433355	0.00960499	0.00541652	0.0106027	0.013983	0.0170564	0.0235117	0.0124702	0.015167	0.0177561	0.0199198	0.0482799	0.00294608	0.0790784	0.0203902
	Heifer for milking herd renewal between 1 and 2 yrs old	% total LU			0.0223892	0.0427423	0.0244471	0.0529561	0.0498445	0.0536917	0.0645727	0.057079	0.0330328	0.0311262	0.0489431	0.0507752	0.0406841	0.0261687	0.0404804	0.0171057	0.013618	0.094725	0.0625685	0.0408267	0.0161141	0.0279772	0.014562	0.0163468	0.0194521	0.0141391	0.0141971	0.0156145	0.0166303	0.000384917	0.00172323	0.000723384	0.00413656
	Heifer for suckler cows renewal between 1 and 2 yrs old	% total LU			0.0159185	0.0267985	0.0234065	0.0253235	0.023257	0.0283652	0.0139916	0.0222872	0.0383447	0.046778	0.0323476	0.017264	0.00620727	0.04281	0.0325431	0.0416869	0.0523603	0.00761888	0.00589193	0.0218664	0.0123771	0.0216454	0.0305122	0.0326151	0.0304924	0.0340882	0.0194107	0.0288243	0.0452775	0.00907198	0.00283702	0.0152862	0.0290661
	Heifer for slaughter between 1 and 2 yrs old	% total LU			0.00694728	0.0100353	0.00825517	0.0103676	0.0112868	0.0078917	0.00795903	0.0103773	0.0123914	0.0162806	0.0109187	0.0102247	0.00471554	0.0110574	0.00842484	0.0133982	0.0207173	0.00908939	0.00555588	0.0142628	0.00608769	0.0130303	0.00539088	0.00291769	0.0086346	0.00296903	0.00316902	0.00603771	0.0053471	0.00343965	0.000840598	0.00613607	0.00343412
	Males of milking type between 1 and 2 yrs old	% total LU			0.00196486	0.027831	0.00551272	0.0316368	0.0340968	0.0524255	0.0456322	0.0277825	0.033742	0.0245171	0.0476037	0.0230211	0.0104142	0.00882166	0.0178728	0.00133668	0.00202602	0.01865	0.0042296	0.00852674	0.00153471	0.00390741	0.000740564	0.00078052	0.000756963	0.000230579	0.000219084	0.000453577	0.000689175	0.000293408	0.000707091	0.000100781	0.000149075
	Males of butcher type between 1 and 2 yrs old	% total LU			0.0115672	0.0285435	0.0205274	0.0340033	0.0430859	0.0375439	0.0282763	0.032575	0.0448974	0.0309974	0.0457396	0.0339528	0.0101862	0.0331853	0.0318776	0.0165708	0.0232274	0.0120122	0.003743	0.016953	0.00487056	0.0154447	0.00797866	0.00631658	0.00824798	0.00488416	0.00745653	0.00945754	0.00862941	0.0167642	0.00189876	0.0202727	0.00543799
	Veal calves	% total LU			0.000319883	0.000439165	0.00101907	0.000705123	0.00141107	0.00102802	0.00318661	0.00172177	0.0010818	0.000551706	0.000813969	0.00187496	0.00387466	0.002579	0.00293297	0.000721966	0.00117426	0.00170218	0.00231068	0.00290415	0.00051689	0.00398535	0.00210446	0.00374751	0.00250112	0.00587958	0.00334305	0.0098397	0.00330567	6.35138e-05	0.000183778	0.000167408	0.00150965
	Other females under 1 yr	% total LU			0.0195551	0.0334333	0.0244499	0.0372375	0.0355838	0.0369688	0.035571	0.0365188	0.0367968	0.0414802	0.0390339	0.031959	0.0210478	0.0347846	0.0345347	0.0353541	0.0442365	0.0455833	0.0313668	0.031046	0.0148212	0.0249449	0.0340875	0.0295237	0.0274789	0.0253057	0.0162241	0.0267962	0.040616	0.00545003	0.00251218	0.0113995	0.0225143
	Other males under 1 yr	% total LU			0.00598257	0.0145757	0.00917424	0.0154721	0.0170169	0.0188975	0.0145838	0.0131711	0.0201344	0.0207191	0.0213122	0.0127886	0.0046404	0.0159023	0.0146948	0.0148071	0.0213385	0.00837238	0.00367755	0.0106242	0.00500336	0.00754439	0.0167557	0.0104569	0.0075468	0.00736204	0.00415533	0.0107066	0.0176023	0.00322343	0.000925482	0.00621184	0.00851023
	kid goats	% total LU			0.000755375	4.41073e-05	0.000384657	4.60767e-05	7.17031e-05	5.59303e-05	4.12756e-05	6.24777e-05	0.000244926	5.39796e-05	0.000120181	0.000373916	0.000176162	0.00362802	0.00297872	0.00680865	0.000669474	0.000167209	0.00140526	0.00186706	0.00232926	0.00466777	0.00198851	0.00133374	0.000454515	0.000384245	4.70624e-05	0.00250486	0.000258402	0.00200944	0.00587443	0.00334624	0.00187118
	female goats	% total LU			0.00460774	0.000587629	0.00220395	0.000426472	0.000597609	0.000637971	0.000382085	0.00047084	0.00170486	0.00040831	0.000888176	0.00322645	0.00115737	0.0210944	0.0160953	0.0404415	0.00457795	0.00137463	0.0114476	0.0122698	0.0162314	0.0358972	0.0122204	0.00910557	0.0041932	0.00299164	0.000996174	0.0163076	0.00167843	0.0122359	0.0417893	0.0289311	0.0204215
	Other caprines (including male goats)	% total LU			0.000182964	3.98931e-05	9.03934e-05	2.62999e-05	3.6467e-05	7.95698e-05	3.26256e-05	2.93689e-05	7.50455e-05	2.49911e-05	4.82791e-05	0.000207916	3.49769e-05	0.00112201	0.000909418	0.00150822	0.000212157	6.76742e-05	0.000505848	0.000496664	0.00176894	0.00252424	0.000763678	0.00082446	0.000335692	0.000110867	9.64096e-05	0.000736479	5.61543e-05	0.000963427	0.00289407	0.000677052	0.000562595
	ewe lambs	% total LU			0.00183827	0.00195804	0.00147143	0.00231031	0.000865581	0.00115037	0.000605662	0.000757015	0.00329949	0.00429958	0.00323183	0.00200252	0.000261029	0.0017865	0.00203138	0.00706801	0.00510307	0.000710002	0.00333972	0.0014877	0.040853	0.00718493	0.0274997	0.0107376	0.00287726	0.0216173	0.000762333	0.0102891	0.00157007	0.0357346	0.0611145	0.0189748	0.0127382
	Sheep	% total LU			0.0278173	0.0332054	0.0250502	0.0240884	0.00975185	0.0159471	0.0111248	0.010513	0.0298828	0.0379546	0.0374648	0.0307562	0.00313859	0.0206056	0.0210116	0.081978	0.0569839	0.0109206	0.0407984	0.019963	0.509889	0.098998	0.201783	0.105463	0.051947	0.202539	0.0117744	0.119442	0.021676	0.356296	0.624869	0.20447	0.133026
	other ovines (incl. rams)	% total LU			0.00226017	0.00393703	0.000958766	0.00397196	0.00138832	0.00195991	0.000663802	0.00125384	0.0044041	0.00582552	0.00464683	0.00181229	0.000367301	0.00220888	0.00280378	0.00943441	0.00665029	0.00084119	0.00397981	0.00222299	0.0779854	0.010355	0.0233983	0.0149763	0.00535495	0.0128792	0.00110927	0.0165551	0.00189622	0.0750261	0.0245993	0.00464785	0.00638137
	piglets	% total LU			0.00115366	0.00331927	0.0148287	0.00423401	0.00386082	0.00372311	0.0102967	0.0115932	0.00843724	0.00140992	0.00192521	0.00777501	0.0506752	0.00773943	0.0109388	0.00742591	0.00256142	0.00239705	0.000681714	0.00829105	0.001034	0.00280573	0.00461479	0.00348609	0.00498982	0.00685097	0.00969959	0.00565609	0.0027467	0.00323471	0.000121351	0.000473273	2.32614e-05
	young pigs between 20 and 50 kg	% total LU			0.00158646	0.00329381	0.0115399	0.00274171	0.00141742	0.00234989	0.00380101	0.00653041	0.00417572	0.000768734	0.00151292	0.00511148	0.0205044	0.00332846	0.00444611	0.00373236	0.00111096	0.00214105	0.000586023	0.00427642	0.0019649	0.00217519	0.00170357	0.00175586	0.00125353	0.00402339	0.00457317	0.00276622	0.00106717	0.00137857	0.000144316	0.000372566	0.000364999
	Sows over 50 kg	% total LU			0.00138959	0.00719921	0.025301	0.0063812	0.00477767	0.00604578	0.0132266	0.0172774	0.0134953	0.00277197	0.00368898	0.0132497	0.0606966	0.00985968	0.0149701	0.0120625	0.00363533	0.00286923	0.00175069	0.0126032	0.00243907	0.00194281	0.00627946	0.00608332	0.00709333	0.0105363	0.0143986	0.00902182	0.00335688	0.00288318	0.000713519	0.00142458	0.000101922
	Boars over 50 kg	% total LU			5.33073e-05	0.00018956	0.000671361	0.00027029	0.000104285	7.63084e-05	0.000173404	0.000404895	0.0003413	0.000121456	0.000172717	0.000175753	0.000735707	0.000117091	0.000320612	0.000535982	0.000109339	0.000131787	2.3864e-05	0.000206576	7.3441e-05	7.37208e-05	0.00013248	0.000150296	0.000414851	0.000269258	0.000271388	0.000364613	0.000112282	1.28474e-05	3.96399e-05	0.000267928	1.99847e-05
	fattening pigs over 50 kg	% total LU			0.00885857	0.0146018	0.0569366	0.0154323	0.0137861	0.0126541	0.0332245	0.0411502	0.0268786	0.00533936	0.0072053	0.0307791	0.174656	0.0254371	0.0374374	0.0244409	0.00959191	0.016603	0.0115806	0.0319897	0.00629046	0.0207836	0.0189315	0.0167624	0.0173414	0.0333969	0.0465464	0.0197885	0.00974454	0.00556028	0.000379546	0.00645351	0.00163421
	Laying hens for hatching eggs	% total LU			0.00983762	0.00431167	0.0131663	0.00029479	0.000881727	0.0020036	0.000607437	0.00518693	0.000984392	0.00105438	0.000618574	0.00181598	0.0121096	0.00722385	0.00772098	0.00526858	0.000711598	0.000753018	0.00156372	0.00123748	5.74853e-05	0.001903	0.000408098	0.0010378	0.00342235	0.00057894	0.00345335	0.00171931	0.000441462	4.40048e-05	8.31164e-05	0.000538368	0.000731089
	Laying hens for consumption eggs	% total LU			0.104712	0.011889	0.0363046	0.0425562	0.00769235	0.00552471	0.00529939	0.0242944	0.00879743	0.00480195	0.00447882	0.0457035	0.0575716	0.0170781	0.0147894	0.0167626	0.00520376	0.00411053	0.0359074	0.0284158	0.0204711	0.0436981	0.00467702	0.00980524	0.0188555	0.0051366	0.0190263	0.0102672	0.00326786	0.0156706	0.0295987	0.0139788	0.0156419
	young hens	% total LU			0.00205311	0.00215698	0.00658663	0.0024504	0.0021416	0.00100233	0.00147539	0.00331558	0.000948259	0.000398471	0.001967	0.00778519	0.0155302	0.00384478	0.00375591	0.00292489	0.000807993	0.000281473	0.0057944	0.00458548	0.00102063	0.00705159	0.000595638	0.000994281	0.00219384	0.000471616	0.00221371	0.00114315	0.00662717	0.000781293	0.00147571	0.00273163	0.00320568
	chickens	% total LU			0.0341013	0.0205905	0.0628759	0.0169311	0.0106005	0.00956825	0.00730286	0.0321897	0.0286903	0.0184139	0.00195541	0.0277066	0.0634634	0.0394004	0.0393583	0.0277776	0.0094847	0.0020368	0.0232364	0.0183884	0.0104415	0.0282779	0.00781416	0.0171863	0.0459183	0.00915888	0.0463342	0.023636	0.00720405	0.00799293	0.0150971	0.0203487	0.0230431
	Duck for 'foie gras'	% total LU			0.000334533	0.000480998	0.00146879	0.000107244	7.77867e-05	0.000223516	5.35886e-05	8.34575e-05	7.86236e-05	6.88452e-05	8.27494e-05	0.00124607	0.00178397	0.0059399	0.00492377	0.00224702	0.000406242	6.58039e-05	0.000186065	0.000147245	0.000130934	0.000226434	0.00683263	0.0193688	0.0568722	0.0111229	0.0573874	0.0291843	0.0342613	0.00010023	0.000189314	0.00156132	0.00182252
	Ducks for roasting	% total LU			0.00114135	0.000988922	0.00301981	0.000137553	0.000600195	0.000459545	0.000413485	0.000122523	0.00165897	0.00183345	8.48758e-05	0.000337477	0.00700045	0.0202079	0.0214925	0.00346478	0.000858777	8.27856e-05	0.00390499	0.00309027	0.000207312	0.00475224	0.000430647	0.00110694	0.00308028	0.000619392	0.00310818	0.00158759	0.000183496	0.000158697	0.000299747	0.000524004	0.000762411
	Turkeys	% total LU			0.000704481	0.0156721	0.0478569	0.00826666	0.00667416	0.0072827	0.00459795	0.00529647	0.00633231	0.00427576	0.000350308	0.0013201	0.0490319	0.026953	0.0264878	0.0209522	0.00338724	0.0012366	0.0240774	0.019054	0.000115409	0.0293013	0.00159027	0.00274812	0.00363812	0.00132625	0.00367108	0.00211781	0.00378582	8.83457e-05	0.000166867	0.00694333	0.00932251
	Gooses	% total LU			0.000645995	0.000252548	0.000771191	0.000109335	0.000122288	0.000117357	8.42466e-05	0.000104092	0.000180468	0.000122723	7.6448e-05	0.000639148	0.000277971	0.000829958	0.000726005	0.00047579	0.000113985	2.98643e-05	0.00030568	0.000241905	0.000115132	0.000372003	0.000849434	0.00240284	0.00360752	0.00137915	0.0036402	0.00212614	0.0134157	8.81331e-05	0.000166466	0.000213142	0.000595907
	Guinea fowls	% total LU			0.00101087	0.00188425	0.00575381	0.000338723	0.000943467	0.000875596	0.000649971	0.00070946	0.000542481	0.000604634	7.73988e-05	0.000121231	0.00205661	0.00573449	0.00517779	0.00331044	0.000678871	0.000136578	0.00173782	0.00137525	0.000472746	0.00211487	0.000752449	0.00188662	0.00411466	0.00104816	0.00415193	0.00221081	0.000481291	0.000361886	0.000683531	0.00109314	0.00129607
	quails	% total LU			3.34759e-05	0.00051873	0.00158402	2.43629e-05	1.24593e-05	0.00024105	8.58345e-06	8.19909e-05	0.000140118	0.000141805	0.000631088	8.35914e-05	0.000162174	0.00231585	0.00209647	0.00108454	0.000103432	6.70622e-06	0.000943523	0.00074667	0.000342063	0.00114824	0.00051947	0.0014845	0.00469151	0.000854217	0.00473401	0.00238163	0.000318568	0.000261848	0.000494579	7.40676e-05	0.000119992
	mother rabbits	% total LU			0.00050356	0.00022315	0.00068142	0.000156606	0.000312433	0.000103696	0.00021524	0.000673066	0.000336512	0.000189058	0.000207649	0.00111062	0.000613525	0.00155935	0.00136586	0.000634885	0.000225859	0.000224066	0.000604639	0.00047849	0.000157057	0.000735826	0.000262045	0.000658209	0.000282707	0.000365877	0.000285267	0.000271833	0.00254471	0.000120226	0.000227084	0.000376273	0.000673549
	horses	% total LU			0.38727	0.0934234	0.167824	0.0437325	0.0713438	0.0314762	0.030051	0.0287304	0.0171745	0.0489109	0.0431366	0.114917	0.0155268	0.0451295	0.0221263	0.0274848	0.0285342	0.0497728	0.0134833	0.116476	0.0143786	0.122911	0.018643	0.0754083	0.0652595	0.0172659	0.297484	0.0400515	0.0180761	0.290832	0.114384	0.342498	0.184049
	donkeys etc	% total LU			0	0	0	0	0	0	0	0	0	0	0	0	0	0	0	0	0	0	0	0	0	0	0	0	0	0	0	0	0	0	0	0	0
					1	1	1	1	1	1	1	1	1	1	1	1	1	1	1	1	1	1	1	1	1	1	1	1	1	1	1	1	1	1	1	1	1
					Ile de France	Eure	Eure-et-Loir	Picardie	Calvados-Orne	Seine Maritime	Manche	Nord Pas de Calais	Champ-Ard-Yonne	Bourgogne	Grande Lorraine	Alsace	Bretagne	Vendée-Charente	Loire aval	Loire Centrale	Loire Amont	Grand Jura	Savoie	Ain-Rhône	Alpes	Isère-Drôme Ardèche	Aveyron-Lozère	Garonne	Gironde	Pyrénées occid	Landes	Dor-Lot	Cantal-Corrèze	Grand Marseille	Côte d'Azur	Gard-Hérault	Pyrénées Orient
	Milking cows	heads			6852.33	36213.5	7729.33	130893	214304	101752	242646	188150	77570.7	60021.8	242339	45964.8	569789	126423	477762	75601.5	278492	151615	83196	82316.2	6712.83	54059	73463.3	87212.5	8706.67	53458.7	11721.8	49991.3	86462.8	565.333	601.167	573.333	819.5
	Suckler cows	heads			6451.67	27087.7	8712.17	75597.5	112388	53704.7	47629.2	80870.5	104614	106354	174770	18472.8	103549	212366	407810	237744	1.0855e+06	19034.3	8980	40533.8	10424.2	43513.3	216193	232638	16779.3	147623	18459.7	124390	293206	5193.17	623	8572	7302.67
	Heifer for milking herd renewal over 2 yrs old	heads			1387.33	10308.2	1904	30798	56419.8	30182.7	59954.3	42589.8	21429.3	17253.8	66400	11549.2	93551.3	23384	101106	14850.5	52403.7	43593.7	19866.2	17836.7	3402.83	12922.8	12397.8	15694.5	1627	8516.83	1552.33	8847.5	16088	56.5	101.167	103.833	165
	Heifer for suckler cows renewal over 2 yrs old	heads			1658.83	7261.67	2337	19152	28700.3	15877.8	13942.7	20701.5	25609.2	25366.5	42786.2	4179.33	23980.5	58711.2	114402	49023.2	194236	3818.17	1818.33	9330.67	2536.33	9701.67	31463	47811.2	3870	38635.7	4996.5	20666.8	43503.5	1425.83	119.833	1821.5	1271.67
	Heifer for slaughter over 2 yrs old	heads			657.667	3093.83	979	8016.33	16136.7	6270.83	8949	10345.5	8820	9147.17	16418.2	2392.33	16798.7	17254.2	33544.7	16368	71689	5059.5	2294	7606.17	1255.67	6910	4296.67	5044	1286.83	2834.5	1161.17	4380.5	4250.33	653.5	39.1667	870.167	155.833
	Males of milking type over 2 yrs old	heads			73.3333	4343.5	163.333	10704	16835.2	17495.3	16261	10580.5	14300.8	5436.33	16699.7	678.333	8845.17	1377.17	16238.5	700.667	3050.33	2483.67	922.833	661.5	108.333	737.333	444	969.167	72	239.667	159.833	1087	596.833	26	35.1667	22.3333	9.5
	Males of butcher type over 2 yrs old	heads			510	4300.83	739	7664.67	16729.8	10161.8	8736.33	9084.33	10271.7	6859	12724.7	1281.83	9832.5	9516.83	29367.8	12766	59822.7	2012	815.333	2951.67	594.833	3246.67	9508.67	12162.8	1411.33	5964.83	1596.17	7120.33	13312.7	3749.5	80.3333	4760.83	424.167
	Heifer for milking herd renewal between 1 and 2 yrs old	heads			2254.83	12154.3	2533.5	45186.3	65849.5	35120	73591.5	63941.7	25320.2	19949.8	80855.8	15531	182265	38654.2	159806	22848.2	63413.3	58039	20543.2	21894.5	3088.17	14950.2	17280.7	20342.3	2037.67	11802.3	2607.33	10927	19395.5	52.1667	82	76	150.167
	Heifer for suckler cows renewal between 1 and 2 yrs old	heads			1603.17	7620.5	2425.67	21608	30724.8	18553.8	15945.8	24966.8	29391.8	29981.7	53439.5	5280.67	27808.7	63235.2	128471	55681.3	243820	4668.17	1934.5	11726.5	2372	11566.7	36208.7	40586.8	3194.17	28454.3	3564.83	20171.2	52805.8	1229.5	135	1606	1055.17
	Heifer for slaughter between 1 and 2 yrs old	heads			699.667	2853.67	855.5	8846.5	14911	5162	9070.67	11625	9498.17	10434.8	18038.2	3127.5	21125.7	16333	33259	17896	96472.2	5569.17	1824.17	7648.83	1166.67	6963	6397.33	3630.83	904.5	2478.33	582	4225.17	6236.17	466.167	40	644.667	124.667
	Males of milking type between 1 and 2 yrs old	heads			140.167	5605.83	404.667	19121.5	31907	24290	36837.3	22045.3	18320.2	11130.7	55705.5	4987.83	33047.8	9230	49977.8	1264.67	6682.67	8094.17	983.667	3239	208.333	1479	622.5	688	56.1667	136.333	28.5	224.833	569.333	28.1667	23.8333	7.5	3.83333
	Males of butcher type between 1 and 2 yrs old	heads			825.167	5749.33	1506.83	20551.8	40318.8	17395	22826.5	25848.2	24377	14072.7	53524.2	7356.33	32324.3	34721.3	89139.7	15678	76613.7	5213.33	870.5	6439.83	661.167	5846	6706.67	5567.83	612	2887.83	970	4688	7128.83	1609.33	64	1508.67	139.833
	Veal calves	heads			273.833	1061.5	897.667	5114.17	15845.3	5715.67	30869.3	16394.7	7048.33	3005.67	11430	4874.83	147547	32380.5	98417.8	8196.83	46478.5	8865	6448.67	13238.2	842	18102	21227.5	39639.5	2227	41716.7	5218.67	58529.2	32770.2	73.1667	74.3333	149.5	465.833
	Other females under 1 yr	heads			5022	24243.3	6461.17	81023.7	119875	61662.8	103375	104319	71923.7	67794.5	164438	24927.7	240450	131021	347651	120418	525278	71219.8	26261.7	42455.7	7243	33991	103151	93686.7	7340.17	53864.7	7598	47817.3	120792	1883.5	304.833	3054	2084.17
	Other males under 1 yr	heads			2560.67	17615.3	4040.67	56108.5	95544.3	52534.2	70637.8	62707.3	65591.5	56438.3	149636	16625	88353.5	99830.5	246546	84056.2	422300	21801.8	5131.67	24214.5	4075.17	17133.8	84506.7	55304.5	3359.83	26117.5	3243.33	31843	87248.3	1856.67	187.167	2773.67	1313
	kid goats	heads			510.5	84.1667	267.5	263.833	635.667	245.5	315.667	469.667	1259.83	232.167	1332.33	767.5	5296	35961.7	78910.3	61027.8	20919.8	687.5	3096.17	6719	2995.5	16738.2	15835.2	11137.7	319.5	2152.33	58	11762.8	2022.33	1827.5	1875.83	2359.17	455.833
	female goats	heads			1546.83	557	761.333	1213	2631.67	1391	1451.5	1758.17	4356	872.333	4891	3289.67	17283.5	103862	211800	180060	71058.8	2807.5	12528.7	21933.5	10368.8	63941.2	48339.5	37770.5	1464.17	8324	609.833	38040	6525	5527.67	6628.5	10131.8	2471.17
	Other caprines (including male goats)	heads			149.167	91.8333	75.8333	181.667	390	421.333	301	266.333	465.667	129.667	645.667	514.833	1268.5	13416.5	29063	16308.2	7997.5	335.667	1344.5	2156.17	2744.33	10919.5	7336.33	8305.5	284.667	749.167	143.333	4172.17	530.167	1057	1114.83	575.833	165.333
	ewe lambs	heads			1329.83	3999.5	1095.33	14160.3	8214	5405	4958.17	6091.5	18166.8	19794.8	38351.3	4399.83	8400	18955.2	57603.8	67814	170691	3124.83	7876.5	5730.83	56238	27578.8	234412	95981.3	2165	129616	1005.67	51720.2	13153.2	34787.8	20889.5	14319.7	3321.67
	Sheep	heads			9338.33	31474.7	8653.33	68513.7	42943.8	34770.2	42261.8	39256.8	76352.2	81088.2	206311	31358.8	46869.7	101456	276493	364995	884502	22303.8	44651.2	35685.8	325724	176338	798184	437469	18138.7	563549	7208	278616	84266.8	160959	99115	71606.5	16097.2
	other ovines (incl. rams)	heads			1842.67	9063	804.333	27436.3	14847.5	10378	6124.17	11370.5	27328	30225.8	62145	4487.5	13320.8	26412.8	89602.7	102013	250691	4172.33	10578	9650.67	120987	44794	224777	150869	4541	87028.5	1649.17	93785	17902.7	82313	9476	3953	1875.33
	piglets	heads			1559.33	12667.8	20624.5	48487.5	68454.3	32684.3	157494	174300	86797.7	12128.2	42686	31918	3.04692e+06	153430	579569	133121	160080	19711.5	3004	59674.2	2659.5	20122.2	73498.3	58222.7	7015.17	76750.8	23907.7	53122	42993	5883.67	77.5	667.333	11.3333
	young pigs between 20 and 50 kg	heads			2144.33	12570.7	16050.3	31397.8	25131.7	20629.2	58138.5	98182.7	42957.5	6612.67	33544.7	20983.7	1232855	65984.7	235567	66908.3	69430.8	17606.3	2582.33	30779.2	5053.83	15600	27132.2	29325.3	1762.33	45073.7	11272	25980.3	16704	2507.5	92.1667	525.333	177.833
	Sows over 50 kg	heads			321.5	4703	6023.5	12508.7	14500	9084.83	34629.3	44463.5	23764	4081.5	14000.5	9310.5	624684	33457.5	135766	37013.8	38889.2	4038.67	1320.5	15527	1073.83	2385	17119	17391	1707	20204.5	6074.83	14503.8	8994	897.667	78	343.833	8.5
	Boars over 50 kg	heads			12.3333	123.833	159.833	529.833	316.5	114.667	454	1042	601	178.833	655.5	123.5	7571.83	397.333	2907.67	1644.67	1169.67	185.5	18	254.5	32.3333	90.5	361.167	429.667	99.8333	516.333	114.5	586.167	300.833	4	4.33333	64.6667	1.66667
	fattening pigs over 50 kg	heads			3729.5	17357.7	24665.8	55046.8	76135.7	34601.2	158288	192704	86126.8	14305.8	49760.2	39356.3	3.27095e+06	157070	617822	136470	186717	42525.8	15894.7	71715.2	5039.5	46427.2	93915	87199.2	7593.83	116536	35735	57888.8	47508.5	3150.17	75.5	2834.33	248
	Laying hens for hatching eggs	heads			70867.5	87699.9	97597.2	17992.2	83320.1	93743.1	49517.7	415622	53972.2	48338.4	73095.8	39732	3.88052e+06	763243	2.18022e+06	503367	237019	33002.1	36724.2	47468.7	788.01	72737.9	34640.5	92376.8	25643.1	34566.8	45364.7	86060.8	36827.7	426.587	282.904	4045.81	1898.39
	Laying hens for consumption eggs	heads			754316	241823	269114	2.59737e+06	726900	258487	432002	1.94668e+06	482345	220147	529254	999949	1.84488e+07	1.8044e+06	4.17618e+06	1.60152e+06	1.73327e+06	180150	843288	1.09001e+06	280619	1.67026e+06	396999	872781	141281	306691	249938	513928	272611	151912	100745	105050	40616.7
	young hens	heads			33691.1	99941.1	111220	340686	460999	106828	273975	605193	118433	41613.7	529481	388010	1.13366e+07	925359	2.41595e+06	636569	613058	28100.8	309989	400683	31870.6	613980	115172	201605	37445.3	64144.5	66243.7	130347	1.25937e+06	17253.1	11441.9	46762	18961.8
	chickens	heads			557812	951000	1.05832e+06	2.34648e+06	2.27458e+06	1.01653e+06	1.3518e+06	5.85686e+06	3.57188e+06	1.91691e+06	524683	1.37649e+06	4.61788e+07	9.45268e+06	2.52362e+07	6.02623e+06	7.17352e+06	202696	1.23914e+06	1.60168e+06	325010	2.45431e+06	1.50613e+06	3.47367e+06	781254	1.24173e+06	1.3821e+06	2.6865e+06	1.36464e+06	175943	116682	347234	135867
	Duck for 'foie gras'	heads			2821.42	11454.3	12747	7663.35	8605.84	12243.6	5114.51	7829.36	5046.93	3695.22	11448.2	31918.6	669297	734761	1.62779e+06	251345	158419	3376.45	5115.97	6612.77	2101.36	10133	679016	2.01847e+06	498907	777529	882605	1.71031e+06	3.34623e+06	1137.56	754.411	13736.9	5540.65
	Ducks for roasting	heads			9626.03	23549.9	26207.6	9829.08	66401.8	25172.6	39463.1	11494.2	106491	98409.1	11742.4	8644.61	2.62638e+06	2.4997e+06	7.10538e+06	387560	334889	4247.79	107370	138784	3327.15	212663	42797	115357	27021.5	43297.5	47803.1	93038.3	17921.7	1801.14	1194.48	4610.34	2317.8
	Turkeys	heads			3651.25	229349	255232	363009	453762	245153	269674	305345	249793	141034	29782.8	20780.3	1.13046e+07	2.04888e+06	5.38134e+06	1.44025e+06	811729	38992.5	406834	525863	1138.24	805797	97119.4	175995	19612.8	56972.8	34696.6	76270.3	227225	616.181	408.639	37541.3	17416.6
	Gooses	heads			2323.52	2564.84	2854.29	3331.89	5769.82	2741.57	3429.05	4164.55	4940.43	2809.2	4510.53	6982.19	44475.4	43783.6	102360	22697	18956.4	653.506	3584.44	4633.15	788.01	7099.53	36000.7	106791	13496.4	41114.8	23876.2	53138.1	558799	426.587	282.904	799.752	772.601
	Guinea fowls	heads			16430.6	86475.8	96234.9	46646.5	201161	92434.6	119552	128268	67110.2	62544.5	20636.5	5984.73	1.48701e+06	1.36707e+06	3.29895e+06	713640	510198	13505.8	92087.5	119030	14622	182393	144112	378908	69563.8	141207	123064	249693	90592.1	7915.55	5249.44	18535.4	7593.56
	quails	heads			1161.76	50830.4	56566.8	7163.56	5672.03	54333	3370.93	31650.6	37010.5	31319.4	359267	8810.86	250362	1.17878e+06	2.85197e+06	499187	165971	1415.93	106751	137984	22589.6	211437	212426	636586	169351	245709	299595	574320	128030	12228.8	8109.91	2681.52	1501.05
	mother rabbits	heads			2655.46	3322.63	3697.6	6996.97	21612.4	3551.58	12844.4	39480	13506.2	6344.84	17962.3	17788	143921	120606	282335	44403.5	55070.3	7188.57	10394.9	13436.1	1576.02	20588.6	16282.7	42888.6	1550.65	15991.6	2743.22	9960.58	155399	853.174	565.808	2069.95	1280.31
	horses	heads			16576	11290.6	7391.56	15859.3	40057.2	8750.21	14555.5	13678.5	5594.93	13323.2	30286.9	14939	29563.2	28331.1	37123.1	15602.4	56470.6	12960.9	1881.47	26547.1	1171.11	27914	9402.52	39881.8	2905.35	6125.23	23219.3	11911.9	8959.68	16751.6	2313.26	15293	2839.6
	donkeys etc	heads			0	0	0	0	0	0	0	0	0	0	0	0	0	0	0	0	0	0	0	0	0	0	0	0	0	0	0	0	0	0	0	0	0
	Milking cows	ktN/yr			753757	3983485	850227	14398230	2.35735e+07	11192720	2.66911e+07	2.06965e+07	8.53277e+06	6.6024e+06	26657290	5.05613e+06	6.26768e+07	13906530	52553820	8316165	30634120	1.66777e+07	9151560	9.05478e+06	738412	5946490	8.08097e+06	9593375	957733	5.88045e+06	1.2894e+06	5.49905e+06	9.51091e+06	62186.7	66128.3	63066.7	90145
	Suckler cows	ktN/yr			632263	2.65459e+06	853792	7408555	1.1014e+07	5.26306e+06	4.66766e+06	7925309	1.02521e+07	10422643	1.71275e+07	1.81034e+06	1.01478e+07	2.08118e+07	39965429	23298912	1.06379e+08	1.86536e+06	880040	3.97232e+06	1.02157e+06	4.26431e+06	2.11869e+07	22798475	1.64437e+06	1.44671e+07	1.80905e+06	12190171	28734188	508930	61054	840056	715661
	Heifer for milking herd renewal over 2 yrs old	ktN/yr			81852.7	608182	112336	1817082	3.32877e+06	1.78078e+06	3.53731e+06	2.5128e+06	1.26433e+06	1.01798e+06	3917600	681401	5.51953e+06	1379656	5965254	876180	3.09182e+06	2.57203e+06	1.1721e+06	1.05236e+06	200767	762447	731472	925976	95993	502493	91587.7	522002	949192	3333.5	5968.83	6126.17	9735
	Heifer for suckler cows renewal over 2 yrs old	ktN/yr			97871.2	428438	137883	1129968	1.69332e+06	936792	822617	1.22139e+06	1.51094e+06	1.49662e+06	2.52438e+06	246581	1.41485e+06	3.46396e+06	6.74969e+06	2.89237e+06	11459924	225272	107282	550509	149644	572398	1856317	2.82086e+06	228330	2.2795e+06	294794	1.21934e+06	2.56671e+06	84124.2	7070.17	107468	75028.3
	Heifer for slaughter over 2 yrs old	ktN/yr			38802.3	182536	57761	472964	952063	369979	527991	610384	520380	539683	968672	141148	991121	1.018e+06	1.97914e+06	965712	4229651	298510	135346	448764	74084.3	407690	253503	297596	75923.2	167236	68508.8	258450	250770	38556.5	2310.83	51339.8	9194.17
	Males of milking type over 2 yrs old	ktN/yr			6526.67	386572	14536.7	952656	1.49833e+06	1.55708e+06	1447229	941664	1.27277e+06	483834	1.48627e+06	60371.7	787220	122568	1.44523e+06	62359.3	271480	221046	82132.2	58873.5	9641.67	65622.7	39516	86255.8	6408	21330.3	14225.2	96743	53118.2	2314	3129.83	1987.67	845.5
	Males of butcher type over 2 yrs old	ktN/yr			45390	382774	65771	682155	1.48896e+06	904403	777534	808506	914178	610451	1.1325e+06	114083	875092	846998	2.61374e+06	1136174	5.32422e+06	179068	72564.7	262698	52940.2	288953	846271	1.08249e+06	125609	530870	142059	633710	1.18483e+06	333706	7149.67	423714	37750.8
	Heifer for milking herd renewal between 1 and 2 yrs old	ktN/yr			114997	619871	129208	2304503	3.35832e+06	1791120	3.75317e+06	3261025	1.29133e+06	1.01744e+06	4.12365e+06	792081	9295532	1.97136e+06	8.15008e+06	1.16526e+06	3234080	2959989	1.0477e+06	1.11662e+06	157496	762458	881314	1.03746e+06	103921	601919	132974	557277	989170	2660.5	4182	3876	7658.5
	Heifer for suckler cows renewal between 1 and 2 yrs old	ktN/yr			81761.5	388646	123709	1102008	1.56697e+06	946245	813238	1.27331e+06	1.49898e+06	1529065	2.72541e+06	269314	1418242	3.22499e+06	6552038	2839748	1.24348e+07	238077	98659.5	598052	120972	589900	1.84664e+06	2.06993e+06	162902	1451171	181806	1.02873e+06	2.6931e+06	62704.5	6885	81906	53813.5
	Heifer for slaughter between 1 and 2 yrs old	ktN/yr			35683	145537	43630.5	451172	760461	263262	462604	592875	484406	532176	919947	159502	1077409	832983	1696209	912696	4.92008e+06	284028	93032.5	390090	59500	355113	326264	185172	46129.5	126395	29682	215484	318044	23774.5	2040	32878	6358
	Males of milking type between 1 and 2 yrs old	ktN/yr			10092	403620	29136	1376748	2297304	1748880	2652288	1587264	1319052	801408	4010796	359124	2379444	664560	3598404	91056	481152	582780	70824	233208	15000	106488	44820	49536	4044	9816	2052	16188	40992	2028	1716	540	276
	Males of butcher type between 1 and 2 yrs old	ktN/yr			59412	413952	108492	1479732	2902956	1252440	1643508	1861068	1755144	1013232	3853740	529656	2327352	2499936	6418056	1128816	5516184	375360	62676	463668	47604	420912	482880	400884	44064	207924	69840	337536	513276	115872	4608	108624	10068
	Veal calves	ktN/yr			1643	6369	5386	30685	95072	34294	185216	98368	42290	18034	68580	29249	885284	194283	590507	49181	278871	53190	38692	79429	5052	108612	127365	237837	13362	250300	31312	351175	196621	439	446	897	2795
	Other females under 1 yr	ktN/yr			100440	484867	129223	1.62047e+06	2.3975e+06	1.23326e+06	2067500	2.08639e+06	1.43847e+06	1355890	3.28875e+06	498553	4809010	2.62042e+06	6953020	2.40836e+06	10505550	1.4244e+06	525233	849113	144860	679820	2.06303e+06	1.87373e+06	146803	1.07729e+06	151960	956347	2.41583e+06	37670	6096.67	61080	41683.3
	Other males under 1 yr	ktN/yr			30728	211384	48488	673302	1146532	630410	847654	752488	787098	677260	1795638	199500	1060242	1197966	2958558	1008674	5067606	261622	61580	290574	48902	205606	1014080	663654	40318	313410	38920	382116	1046980	22280	2246	33284	15756
	kid goats	ktN/yr			3879.8	639.667	2033	2005.13	4831.07	1865.8	2399.07	3569.47	9574.73	1764.47	10125.7	5833	40249.6	273309	599719	463812	158991	5225	23530.9	51064.4	22765.8	127210	120347	84646.3	2428.2	16357.7	440.8	89397.5	15369.7	13889	14256.3	17929.7	3464.33
	female goats	ktN/yr			23666.5	8522.1	11648.4	18558.9	40264.5	21282.3	22208	26900	66646.8	13346.7	74832.3	50331.9	264438	1.5891e+06	3.24053e+06	2.75492e+06	1.0872e+06	42954.8	191689	335583	158643	978300	739594	577889	22401.8	127357	9330.45	582012	99832.5	84573.3	101416	155017	37808.8
	Other caprines (including male goats)	ktN/yr			939.75	578.55	477.75	1144.5	2457	2654.4	1896.3	1677.9	2933.7	816.9	4067.7	3243.45	7991.55	84523.9	183097	102741	50384.2	2114.7	8470.35	13583.8	17289.3	68792.8	46218.9	52324.7	1793.4	4719.75	903	26284.7	3340.05	6659.1	7023.45	3627.75	1041.6
	ewe lambs	ktN/yr			9441.82	28396.4	7776.87	100538	58319.4	38375.5	35203	43249.7	128985	140543	272294	31238.8	59640	134582	408987	481479	1.21191e+06	22186.3	55923.1	40688.9	399290	195810	1.66432e+06	681467	15371.5	920274	7140.23	367213	93387.5	246994	148315	101670	23583.8
	Sheep	ktN/yr			142877	481562	132396	1.04826e+06	657041	531984	646606	600630	1.16819e+06	1.24065e+06	3.15656e+06	479790	717106	1.55228e+06	4230348	5.58442e+06	1.35329e+07	341249	683163	545993	4.98357e+06	2.69798e+06	1.22122e+07	6.69328e+06	277522	8.6223e+06	110282	4.26283e+06	1.28928e+06	2.46268e+06	1.51646e+06	1.09558e+06	246287
	other ovines (incl. rams)	ktN/yr			11608.8	57096.9	5067.3	172849	93539.2	65381.4	38582.2	71634.1	172166	190423	391514	28271.2	83921.2	166401	564497	642681	1.57935e+06	26285.7	66641.4	60799.2	762216	282202	1.4161e+06	950476	28608.3	548280	10389.8	590846	112787	518572	59698.8	24903.9	11814.6
	piglets	ktN/yr			5925.47	48137.8	78373.1	184252	260126	124200	598478	662341	329831	46087	162207	121288	1.15783e+07	583032	2.20236e+06	505860	608303	74903.7	11415.2	226762	10106.1	76464.2	279294	221246	26657.6	291653	90849.1	201864	163373	22357.9	294.5	2535.87	43.0667
	young pigs between 20 and 50 kg	ktN/yr			8148.47	47768.5	60991.3	119312	95500.3	78390.8	220926	373094	163238	25128.1	127470	79737.9	4684849	250742	895155	254252	263837	66904.1	9812.87	116961	19204.6	59280	103102	111436	6696.87	171280	42833.6	98725.3	63475.2	9528.5	350.233	1996.27	675.767
	Sows over 50 kg	ktN/yr			7137.3	104407	133722	277692	321900	201683	768771	987090	527561	90609.3	310811	206693	1.3868e+07	742756	3.014e+06	821707	863339	89658.4	29315.1	344699	23839.1	52947	380042	386080	37895.4	448540	134861	321985	199667	19928.2	1731.6	7633.1	188.7
	Boars over 50 kg	ktN/yr			273.8	2749.1	3548.3	11762.3	7026.3	2545.6	10078.8	23132.4	13342.2	3970.1	14552.1	2741.7	168095	8820.8	64550.2	36511.6	25966.6	4118.1	399.6	5649.9	717.8	2009.1	8017.9	9538.6	2216.3	11462.6	2541.9	13012.9	6678.5	88.8	96.2	1435.6	37
	fattening pigs over 50 kg	ktN/yr			45499.9	211764	300923	671571	928855	422134	1.93111e+06	2.35099e+06	1.05075e+06	174531	607074	480147	3.99056e+07	1.91625e+06	7.53743e+06	1664934	2.27795e+06	518815	193915	874925	61481.9	566411	1145763	1.06383e+06	92644.8	1.42174e+06	435967	706244	579604	38432	921.1	34578.9	3025.6
	Laying hens for hatching eggs	ktN/yr			50528.5	62530	69586.8	12828.4	59407.3	66838.8	35306.2	296339	38482.1	34465.3	52117.3	28328.9	2.76681e+06	544192	1.5545e+06	358901	168995	23530.5	26184.3	33845.2	561.851	51862.1	24698.7	65864.7	18283.6	24646.1	32345	61361.4	26258.1	304.156	201.711	2884.66	1353.55
	Laying hens for consumption eggs	ktN/yr			537827	172420	191878	1.85193e+06	518280	184301	308017	1.38798e+06	343912	156965	377358	712964	1.3154e+07	1.28654e+06	2.97761e+06	1.14188e+06	1.23582e+06	128447	601264	777178	200081	1.1909e+06	283060	622293	100734	218671	178206	366431	194372	108313	71831.4	74900.5	28959.7
	young hens	ktN/yr			10545.3	31281.6	34811.8	106635	144293	33437.1	85754.2	189425	37069.6	13025.1	165728	121447	3.54835e+06	289637	756192	199246	191887	8795.54	97026.5	125414	9975.51	192176	36048.9	63102.4	11720.4	20077.2	20734.3	40798.6	394183	5400.21	3581.31	14636.5	5935.05
	chickens	ktN/yr			175153	298614	332314	736796	714218	319191	424465	1.83905e+06	1.12157e+06	601908	164751	432217	1.45002e+07	2.96814e+06	7.92417e+06	1.89224e+06	2.25249e+06	63646.5	389090	502928	102053	770653	472924	1.09073e+06	245314	389903	433979	843560	428496	55246.2	36638.2	109031	42662.4
	Duck for 'foie gras'	ktN/yr			1718.25	6975.68	7762.92	4666.98	5240.95	7456.36	3114.74	4768.08	3073.58	2250.39	6971.96	19438.4	407602	447469	991324	153069	96476.9	2056.26	3115.63	4027.18	1279.73	6170.98	413521	1.22925e+06	303834	473515	537507	1.04158e+06	2.03786e+06	692.777	459.436	8365.78	3374.26
	Ducks for roasting	ktN/yr			5862.25	14341.9	15960.4	5985.91	40438.7	15330.1	24033	6999.95	64853	59931.1	7151.11	5264.57	1.59947e+06	1.52231e+06	4.32718e+06	236024	203948	2586.9	65388.4	84519.4	2026.24	129512	26063.4	70252.7	16456.1	26368.2	29112.1	56660.3	10914.3	1096.9	727.44	2807.69	1411.54
	Turkeys	ktN/yr			3618.39	227285	252935	359742	449678	242946	267247	302597	247545	139764	29514.8	20593.3	1.12029e+07	2.03044e+06	5.33291e+06	1.42728e+06	804423	38641.6	403172	521130	1127.99	798545	96245.3	174411	19436.3	56460	34384.4	75583.9	225180	610.635	404.961	37203.4	17259.9
	Gooses	ktN/yr			3317.99	3662.58	4075.92	4757.94	8239.31	3914.96	4896.68	5946.98	7054.93	4011.53	6441.04	9970.56	63510.9	62523	146170	32411.3	27069.8	933.207	5118.58	6616.14	1125.28	10138.1	51408.9	152497	19272.8	58712	34095.2	75881.2	797965	609.166	403.987	1142.05	1103.27
	Guinea fowls	ktN/yr			5192.08	27326.3	30410.2	14740.3	63567	29209.3	37778.3	40532.7	21206.8	19764.1	6521.15	1891.18	469896	431995	1.04247e+06	225510	161223	4267.83	29099.6	37613.4	4620.54	57636.3	45539.3	119735	21982.2	44621.4	38888.2	78903.1	28627.1	2501.32	1658.82	5857.2	2399.57
	quails	ktN/yr			171.941	7522.89	8371.89	1060.21	839.46	8041.28	498.897	4684.29	5477.55	4635.26	53171.6	1304.01	37053.5	174459	422091	73879.7	24563.7	209.558	15799.2	20421.6	3343.26	31292.7	31439.1	94214.7	25063.9	36364.9	44340.1	84999.4	18948.4	1809.87	1200.27	396.865	222.156
	mother rabbits	ktN/yr			2586.41	3236.24	3601.46	6815.05	21050.5	3459.24	12510.4	38453.5	13155	6179.88	17495.2	17325.5	140179	117470	274994	43249	53638.5	7001.67	10124.6	13086.8	1535.04	20053.3	15859.4	41773.5	1510.33	15575.8	2671.9	9701.6	151359	830.991	551.097	2016.13	1247.02
	horses	ktN/yr			1.98912e+06	1.35487e+06	886987	1903120	4.80686e+06	1.05003e+06	1.74666e+06	1641420	671392	1.59878e+06	3.63443e+06	1792680	3547580	3.39973e+06	4.45478e+06	1.87229e+06	6.77647e+06	1.55531e+06	225776	3.18565e+06	140534	3.34969e+06	1.1283e+06	4.78581e+06	348642	735027	2.78632e+06	1.42942e+06	1.07516e+06	2.01019e+06	277591	1.83516e+06	340752
	donkeys etc	ktN/yr			0	0	0	0	0	0	0	0	0	0	0	0	0	0	0	0	0	0	0	0	0	0	0	0	0	0	0	0	0	0	0	0	0
	total	ktN/yr			5.13626e+06	1.45025e+07	5.28523e+06	4.35173e+07	6.7376e+07	3.33594e+07	5.81231e+07	5.71318e+07	3.90923e+07	3.26877e+07	8.42539e+07	1.55998e+07	2.28481e+08	7.53327e+07	2.01334e+08	6.81209e+07	2.37486e+08	3.12482e+07	1.67449e+07	2.73502e+07	9.77383e+06	2.72528e+07	6.05214e+07	6.34654e+07	5.3424e+06	4.25711e+07	9.36629e+06	3.56896e+07	5.94798e+07	6.91189e+06	2.42684e+06	5.35815e+06	1.85142e+06
7.	livestock production	calculated from head numbers with current coefficients specific for each livestock breeding region
		curent ref values			Ile de France	Eure	Eure-et-Loir	Picardie	Calvados-Orne	Seine Maritime	Manche	Nord Pas de Calais	Champ-Ard-Yonne	Bourgogne	Grande Lorraine	Alsace	Bretagne	Vendée-Charente	Loire aval	Loire Centrale	Loire Amont	Grand Jura	Savoie	Ain-Rhône	Alpes	Isère-Drôme Ardèche	Aveyron-Lozère	Garonne	Gironde	Pyrénées occid	Landes	Dor-Lot	Cantal-Corrèze	Grand Marseille	Côte d'Azur	Gard-Hérault	Pyrénées Orient
	bovines	kton carcass/yr			2.35288	14.1556	3.32998	45.7708	82.3245	43.8476	69.1713	62.0746	44.3154	33.2419	103.415	14.4139	185.779	92.724	232.258	43.5823	181.207	22.5884	11.0293	23.6626	2.05373	19.9506	37.8111	44.8899	2.4401	26.1425	5.10833	36.7474	32.9479	0.768517	0.7855	1.09383	0.6892
	ovines	kton carcass/yr			0.270067	1.11757	0.316567	1.71085	1.6991	0.9397	1.37522	0.860167	2.42017	2.55735	5.03133	0.8049	1.94067	3.73145	8.26015	12.3235	22.5757	0.522367	1.03995	0.983667	5.3734	3.47355	18.5567	11.221	0.232667	7.5062	0.0932333	7.01523	1.73597	0.991667	1.56555	1.42685	0.34445
	caprines	kton carcass/yr			0.0196	0.0118	0.0174333	0.01815	0.0902167	0.02465	0.0335167	0.0158167	0.0345333	0.0179167	0.0657	0.0364	0.203367	1.48535	2.50568	2.18697	0.717967	0.0172833	0.148933	0.3178	0.121217	0.812633	0.380067	0.654033	0.024	0.0986667	0.0102167	0.299983	0.0490833	0.0256833	0.0457833	0.139933	0.04195
	porcines	kton carcass/yr			1.24777	7.92562	8.59372	19.9089	30.4919	15.6041	64.9728	79.7951	36.7955	6.42495	18.3188	11.3471	1289.46	59.278	238.84	50.4911	70.6363	13.4473	5.47875	30.1617	2.61218	20.1343	30.3421	31.012	2.28478	43.6593	9.3438	24.0497	16.0063	0.8349	0.0651333	1.06435	0.0997167
	poultry	kton carcass/yr			5.62973	9.03719	10.0571	20.3753	17.1652	9.65992	9.19609	24.9195	22.4203	11.0028	12.1659	5.02843	221.907	58.3676	144.134	53.4294	51.426	4.09847	7.70154	9.95481	4.27955	15.2541	13.6096	31.9658	5.44434	11.4982	9.63146	19.6949	6.23984	2.31672	2.63498	2.95544	1.38676
	equine	kton carcass/yr			0.518184	0.236294	0.847021	0.927708	1.82679	0.450755	0.245737	1.4127	0.456582	0.740444	1.17348	0.430813	1.5662	0.769484	1.76735	0.694481	2.468	0.459242	0.0808557	0.919769	0.0789217	1.86631	0.593677	2.27246	0.149004	0.222465	0.862554	0.579572	0.326831	0.275294	0.0832813	0.491362	0.122328
	eggs	kton/yr			10.7781	5.85214	6.51258	26.6306	14.1077	6.2554	7.55805	17.5431	21.5225	9.89411	19.1235	8.31933	116.686	22.4165	43.8751	34.3527	47.7652	6.58126	7.32484	9.4679	7.02057	14.508	11.458	25.5096	1.82353	9.00544	3.22596	8.36017	7.93401	3.80056	4.32265	2.93098	1.37529
	cow milk	kton/yr			47.3103	223.9	52.5226	893.868	1264.67	611.005	1392.37	1293.81	519.544	359.323	1511.26	299.895	4968.51	843.522	3215.27	527.775	1401.24	846.116	399.839	495.581	27.7726	294.093	392.261	497.367	49.0061	303.761	73.9966	277.855	442.688	2.55292	2.93495	2.01133	3.14802
	sheep and goat milk	kton/yr			0.297833	1.66667e-06	0.2795	0.9505	1.37513	0.383833	0.9009	0.804917	2.96062	0.668283	1.99667	1.31933	14.9392	80.3488	162.538	121.819	43.0403	1.06065	6.17172	11.3048	4.08732	38.2611	192.392	50.3103	0.502217	53.4573	0.237967	24.983	3.99833	1.87075	1.86107	10.1126	1.63675
	bovines	kg carcass/head/yr			75.9713	83.5074	79.8758	84.7002	93.9252	96.1826	90.8626	89.4227	86.2023	74.9965	89.212	86.1921	116.165	106.038	99.5321	59.4499	56.1663	54.9479	60.6372	81.0104	45.9536	82.7407	60.6076	67.9144	45.6224	61.5507	80.4967	93.053	42.0057	40.7301	312.824	41.2083	44.5076
	ovines	kg carcass/head/yr			21.5866	25.0929	29.9978	15.5376	25.7419	18.5884	25.7801	15.1655	19.8623	19.5056	16.399	19.9994	28.2935	25.4144	19.4953	23.0424	17.2877	17.6469	16.4795	19.2622	10.6838	13.9662	14.7583	16.3973	9.36485	9.62095	9.453	16.5406	15.0531	3.56638	12.091	15.8752	16.1758
	caprines	kg carcass/head/yr			8.88285	16.0982	15.7815	10.9436	24.6673	11.9786	16.206	6.34146	5.67842	14.5172	9.56471	7.9615	8.52762	9.69292	7.83582	8.49651	7.18138	4.51183	8.77662	10.3153	7.52493	8.87166	5.3148	11.4314	11.6035	8.78951	12.595	5.55782	5.40714	3.05312	4.75959	10.709	13.5658
	porcines	kg carcass/head/yr			18.6276	19.1059	14.8794	15.7433	18.8991	18.8238	18.4092	18.1491	17.6501	18.8788	14.9894	12.7409	18.3671	16.9288	17.4164	15.3783	17.4869	17.8252	22.3752	19.2236	22.6458	26.5936	15.8344	17.3045	13.7546	18.6206	13.2151	17.9231	15.804	9.24222	19.1928	22.0913	25.1167
	poultry	kg carcass/head/yr			7.0679	10.5674	10.5674	6.56006	8.4756	10.5674	7.64035	6.05316	11.7791	10.5502	13.7124	3.66839	4.63369	5.91053	5.59752	9.23793	9.85072	14.6313	4.6807	4.6807	13.0582	4.6807	9.09241	8.58345	6.94779	8.42415	6.94779	7.19985	1.44636	13.0582	22.3951	11.4003	13.0915
	equine	kg carcass/head/yr			0.260509	0.174403	0.954942	0.487467	0.380038	0.42928	0.14069	0.860658	0.680052	0.463129	0.32288	0.240318	0.441484	0.226337	0.396731	0.370926	0.364202	0.295273	0.358124	0.288722	0.561586	0.557159	0.526168	0.474833	0.427383	0.302663	0.309568	0.405459	0.303984	0.136949	0.300014	0.267749	0.358992
	eggs	kg eggs/laying hens/yr			20.0401	33.9412	33.9412	14.3799	27.2202	33.9412	24.5378	12.6393	62.5814	63.034	50.6774	11.6687	8.87078	17.4239	14.735	30.0843	38.6506	51.2372	12.1824	12.1824	35.0885	12.1824	40.4791	40.9929	18.1025	41.1827	18.1025	22.8151	40.8188	35.0885	60.1778	39.1316	47.4896
	cow milk	kg milk/milking cow/yr			6904.26	6182.78	6795.23	6829	5901.29	6004.84	5738.28	6876.49	6697.69	5986.54	6236.16	6524.45	8719.9	6672.22	6729.85	6981.01	5031.52	5580.68	4805.99	6020.45	4137.24	5440.22	5339.55	5702.93	5628.57	5682.16	6312.71	5558.07	5119.98	4515.77	4882.09	3508.14	3841.39
	sheep and goat milk	kg milk/sheep and goat/yr			1.78833	3.40077e-06	1.94037	0.890967	1.97207	0.693759	1.34701	1.28268	2.39758	0.532923	0.617898	2.48874	15.2201	25.5776	21.7562	14.6078	2.94392	2.76065	7.05459	12.8234	0.794856	10.4076	14.8545	6.91915	1.67448	6.10964	1.98947	5.15663	2.87833	0.73442	1.15032	8.08618	5.76127
[truncated: 58 more columns]

## Sheet: pvar
	Primary data, parameters, pre-treatments				GC	GC	GC	GC				GC	GC	GC		GC				GC									GC		GC			GC	GC	GC	GC
Territory					Ile de France	Eure	Eure-et-Loir	Picardie	Calvados-Orne	Seine Maritime	Manche	Nord Pas de Calais	Champ-Ard-Yonne	Bourgogne	Grande Lorraine	Alsace	Bretagne	Vendée-Charente	Loire aval	Loire Centrale	Loire Amont	Grand Jura	Savoie	Ain-Rhône	Alpes	Isère-Drôme Ardèche	Aveyron-Lozère	Garonne	Gironde	Pyrénées occid	Landes	Dor-Lot	Cantal-Corrèze	Grand Marseille	Côte d'Azur	Gard-Hérault	Pyrénées Orient	France
		Unit	Source
	Population and its social characteristics
	Population	Minhab	Projection (see Billen et al., 2018 fr details on calculation)		13.77	0.71	0.5	2.16	1.11	1.35	0.55	4.4	1.61	0.78	2.82	2.17	4.1	2.08	4.2	3.03	3.66	1.08	1.52	2.93	0.38	2.64	0.43	3.91	1.9	1.07	0.52	0.72	0.44	3.01	2.58	2.33	0.59		75.05
	Urban population	%	INSEE		95.93	56.4674	61.0008	59.7848	54.2671	75.7968	49.121	86.9052	57.6844	55.3402	62.0309	78.4963	68.0222	55.3233	62.8612	62.624	56.8626	65.1701	80.2863	78.8042	57.5799	72.4181	51.0183	61.7268	83.6902	69.7324	57.7719	44.2237	47.1035	94.5378	95.6903	84.6187	86.0027
	Total per capita protein ingestion	kgN/cap/an	carnivore		6.7	6.7	6.7	6.7	6.7	6.7	6.7	6.7	6.7	6.7	6.7	6.7	6.7	6.7	6.7	6.7	6.7	6.7	6.7	6.7	6.7	6.7	6.7	6.7	6.7	6.7	6.7	6.7	6.7	6.7	6.7	6.7	6.7	6.7
	Vegetal per capita protein ingestion	kgN/cap/an	carnivore		2.25	2.25	2.25	2.25	2.25	2.25	2.25	2.25	2.25	2.25	2.25	2.25	2.25	2.25	2.25	2.25	2.25	2.25	2.25	2.25	2.25	2.25	2.25	2.25	2.25	2.25	2.25	2.25	2.25	2.25	2.25	2.25	2.25	2.25
	Edible animal per capita protein ingestion (excl fish)	kgN/cap/an	carnivore		4.4	4.4	4.4	4.4	4.4	4.4	4.4	4.4	4.4	4.4	4.4	4.4	4.4	4.4	4.4	4.4	4.4	4.4	4.4	4.4	4.4	4.4	4.4	4.4	4.4	4.4	4.4	4.4	4.4	4.4	4.4	4.4	4.4	4.4
	Total per capita C ingestion	kgC/cap/an	carnivore		178.621	178.621	178.621	178.621	178.621	178.621	178.621	178.621	178.621	178.621	178.621	178.621	178.621	178.621	178.621	178.621	178.621	178.621	178.621	178.621	178.621	178.621	178.621	178.621	178.621	178.621	178.621	178.621	178.621	178.621	178.621	178.621	178.621	178.621	117.024
	Vegetal per capita C ingestion	kgC/cap/an	carnivore		80.3205	80.3205	80.3205	80.3205	80.3205	80.3205	80.3205	80.3205	80.3205	80.3205	80.3205	80.3205	80.3205	80.3205	80.3205	80.3205	80.3205	80.3205	80.3205	80.3205	80.3205	80.3205	80.3205	80.3205	80.3205	80.3205	80.3205	80.3205	80.3205	80.3205	80.3205	80.3205	80.3205	80.3205
	Edible animal per capita C ingestion (excl fish)	kgC/cap/an	carnivore		36.7034	36.7034	36.7034	36.7034	36.7034	36.7034	36.7034	36.7034	36.7034	36.7034	36.7034	36.7034	36.7034	36.7034	36.7034	36.7034	36.7034	36.7034	36.7034	36.7034	36.7034	36.7034	36.7034	36.7034	36.7034	36.7034	36.7034	36.7034	36.7034	36.7034	36.7034	36.7034	36.7034	36.7034
	hulman cereal cons	ktN/yr			18.3141	0.9443	0.665	2.8728	1.4763	1.7955	0.7315	5.852	2.1413	1.0374	3.7506	2.8861	5.453	2.7664	5.586	4.0299	4.8678	1.4364	2.0216	3.8969	0.5054	3.5112	0.5719	5.2003	2.527	1.4231	0.6916	0.9576	0.5852	4.0033	3.4314	3.0989	0.7847
	Fertilization and Erosion
	Surfaces
	total utilized agricultural area (UAA)	ha			572057	393517	454242	1.34162e+06	836467	406137	456313	828742	1.63512e+06	761377	1.41389e+06	316164	1.67357e+06	1.20081e+06	2.14103e+06	2.39553e+06	2.93726e+06	458051	244092	381733	399978	567783	782923	1.89944e+06	127285	653845	205144	561345	586944	185031	178052	202677	92462.6	2.72906e+07
	Permanent Grassland area	ha	Agreste (data for 2014)		0	6.75595e-06	0	0	184019	64783	121181	0	0	0	394553	0	156188	173971	351312	0	1.48589e+06	329232	225911	181873	259385	263988	410276	364214	0	297637	0	223174	415584	0	0	0	0	5.90317e+06
	Arable land	ha	Agreste (data for 2014)		572057	393517	454242	1.34162e+06	652448	341354	335132	828742	1.63512e+06	761377	1.01934e+06	316164	1.51738e+06	1.02684e+06	1.78972e+06	2.39553e+06	1.45138e+06	128820	18181.9	199860	140593	303795	372647	1.53523e+06	127285	356207	205144	338171	171360	185031	178052	202677	92462.6	2.13875e+07
	Temporary Grassland area	ha	Agreste (data for 2014)		7166.3	15008.4	4362.66	23048.7	58889.6	19108.6	89655.7	16557.4	192738	52508.6	73333.8	12546.8	406815	212945	470394	246797	527999	41169.7	7028.15	38684	74841.2	65605.8	232184	284467	12272.3	100899	11818.7	137687	116466	34770.5	44097.7	36306.7	15978.5	3.68415e+06
	Synthetic fertilization
	Synth N fertilizer application to cropland	kgN/ha/yr	No fert		220	225	160	225	95	35	55	210	165	165	25	205	5	25	30	170	0	0	0	0	0	0	0	75	125	50	135	0	0	85	210	85	95	87.1212
	Synth P fertilizer application to cropland	ktP/yr	Adjusted in order to reach P balance over cropland = 0 (see Billen et al., 20148 for further details)		10.0921	8.61464	6.06332	34.2075	3.82497	0	0.213725	20.3773	27.3558	12.7944	0	7.24429	0	0	0	43.4689	0	0	0	0	0	0	0	1.57979	1.02167	0	2.63071	0	0	0.190394	3.25208	0.681067	0.824197	184.437
	Synth N fertilizer application to grassland	kgN/ha/yr	No fert						48	48	41.5548						48	33	48		29	23	5.88238	23	11.8691	23	29	25	30	54.068		25	21.0026	18	4.77285	19	4.3864	27.8425
	Synth P fertilizer application to grassland	ktP/yr	Adjusted in order to reach P balance over grassland = 0 (see Billen et al., 20148 for further details)		0	2.88752e-11	0	0	0	0	0	0	0	0	0	0	0	0	0	0	0	0.333855	0.121369	0	0	0	0	0	0	0	0	0	0.396244	0	0	0	0	0.851468
	Volatilisation loss of synth fertilizer	%	MEEM		4.3	5	5.5	5.1	3.9	5	3.9	2.8	6.3	5.5	5.56	5.7	3.1	5.3	4.04	5.61667	3.25	3.8	3.9	3.9	4.3	3.9	5.2	6.04286	7.5	6.8	7.5	6.8	2.8	4.3	4.3	4.3	4.3	4.83362
	Symbiotic and non symbiotic N fertilization
	N2 fixing arable	ktonN/yr			0.0951507	0.00687198	0.129856	1.06177	0.00177291	0.00115067	0.00475431	1.61096	0.182603	0.0441864	0.00357368	0.00319776	1.18173	0.164492	0.087104	0.407917	0.286417	0.0364266	0.00155305	0.00713704	0.00871762	0.01289	0.00171972	0.410357	0.224084	0.166363	0.232101	0.00949955	0.00381018	0.0148674	0.0649962	0.171423	0.0107996	6.65025
	N2 fixing grassland	ktonN/yr			0	2.83794e-10	0	0	7.50017	3.79371	6.75753	0	0	0	14.3364	0	5.99973	7.13718	12.9764	0	51.1493	9.87034	4.57236	6.44478	3.42966	5.51441	8.8802	8.52797	0	7.81397	0	5.80415	13.6165	0	0	0	0	0
	N fixation coef grain for cropland	kgN/kgN/yr	Anglade et al. (2015)		1.23	1.23	1.23	1.23	1.23	1.23	1.23	1.23	1.23	1.23	1.23	1.23	1.23	1.23	1.23	1.23	1.23	1.23	1.23	1.23	1.23	1.23	1.23	1.23	1.23	1.23	1.23	1.23	1.23	1.23	1.23	1.23	1.23	1.23
	N fixation coef fodder for cropland	kgN/kgN/yr	Anglade et al. (2015)		1.47	1.47	1.47	1.47	1.47	1.47	1.47	1.47	1.47	1.47	1.47	1.47	1.47	1.47	1.47	1.47	1.47	1.47	1.47	1.47	1.47	1.47	1.47	1.47	1.47	1.47	1.47	1.47	1.47	1.47	1.47	1.47	1.47	1.47
	N fixation coef for perm grassland	kgN/kgN/yr	Assuming 25% of grassland are forage legumes		0.3675	0.3675	0.3675	0.3675	0.3675	0.3675	0.3675	0.3675	0.3675	0.3675	0.3675	0.3675	0.3675	0.3675	0.3675	0.3675	0.3675	0.3675	0.3675	0.3675	0.3675	0.3675	0.3675	0.3675	0.3675	0.3675	0.3675	0.3675	0.3675	0.3675	0.3675	0.3675	0.3675	0.3675
	Wet deposition (N&P)
	N atmosph deposition	kgN/ha/yr	EMEP (data for 2009)		11.3468	12.0334	10.1831	12.3882	13.4581	13.0378	14.3676	14.3203	11.9366	10.928	12.8126	12.6041	16.4552	10.845	14.466	10.9533	11.6232	13.1195	8.47853	13.0248	6.45298	10.4135	9.60492	10.4028	8.874	12.3126	10.7771	10.6984	10.8284	10.4115	8.75646	11.296	10.3345	11.5014
	N atmosph deposition on arable land	ktN/yr			6.49101	4.73535	4.62558	16.6203	8.78068	4.4505	4.81503	11.8679	19.5179	8.32034	13.0604	3.98495	24.9689	11.1361	25.89	26.239	16.8696	1.69005	0.154156	2.60315	0.907243	3.16356	3.57925	15.9706	1.12952	4.38585	2.21085	3.61788	1.85555	1.92645	1.5591	2.28945	0.955555	260.372
	N atmosph deposition on permanent grassland	ktN/yr			0	8.12971e-11	0	0	2.47653	0.844628	1.74107	0	0	0	5.05524	0	2.57012	1.88671	5.08208	0	17.2707	4.31936	1.91539	2.36886	1.67381	2.74904	3.94067	3.78884	0	3.6647	0	2.3876	4.50009	0	0	0	0	68.2354
	Sludges
	N recycling rate of human excretion in urban area	%	Kept constant compared with current level of recycling rate		5.2283	10.2154	10.2154	10.2154	10.2154	10.2154	10.2154	10.2679	10.2154	10.2154	10.2154	10.2679	10.2154	10.2154	10.2154	10.2154	10.2154	10.2154	10.2154	10.2679	10.2679	10.2679	10.2154	10.2154	10.2154	10.2154	10.2154	10.2154	10.2154	10.2154	10.2154	10.2154	10.2154	10.0722
	N recycling rate of human excretion in rural area	%	Kept constant compared with current level of recycling rate		5.2283	2.49375	2.49375	2.49375	2.49375	2.49375	2.49375	2.52875	2.49375	2.49375	2.49375	2.52875	2.49375	2.49375	2.49375	2.49375	2.49375	2.49375	2.49375	2.52875	2.52875	2.52875	2.49375	2.49375	2.49375	2.49375	2.49375	2.49375	2.49375	2.49375	2.49375	2.49375	2.49375	2.58192
	C recycling rate of human excretion in urban area	%	Kept constant compared with current level of recycling rate		15.2096	19.7169	19.7169	19.7169	19.7169	19.7169	19.7169	19.6569	19.7169	19.7169	19.7169	19.6569	19.7169	19.7169	19.7169	19.7169	19.7169	19.7169	19.7169	19.6569	19.6569	19.6569	19.7169	19.7169	19.7169	19.7169	19.7169	19.7169	19.7169	19.7169	19.7169	19.7169	19.7169	19.5712
	C recycling rate of human excretion in rural area	%	Kept constant compared with current level of recycling rate		15.2096	7.14875	7.14875	7.14875	7.14875	7.14875	7.14875	7.18875	7.14875	7.14875	7.14875	7.18875	7.14875	7.14875	7.14875	7.14875	7.14875	7.14875	7.14875	7.18875	7.18875	7.18875	7.14875	7.14875	7.14875	7.14875	7.14875	7.14875	7.14875	7.14875	7.14875	7.14875	7.14875	7.39908
	N Sludges to cropland	ktN/yr			2.29755	1.03293	0.960441	1.86054	0.483802	0.73338	0.26722	2.62626	0.699282	0.366355	1.24809	1.19618	1.94263	0.853616	1.85038	1.34755	1.48153	0.534524	0.859504	1.60812	0.220173	1.34836	0.229669	1.69868	1.10442	0.555638	0.273406	0.308011	0.22793	1.93717	1.67996	1.36138	0.366972	35.5616
	C Sludges to cropland	ktC/yr			17.1491	7.01966	6.64266	11.6821	2.57768	3.72808	1.52557	12.9523	3.63121	1.99179	6.33175	5.96148	9.74745	4.40489	9.31113	6.82196	7.50835	2.78553	4.33483	7.98363	1.25096	6.73324	1.33207	8.56438	5.53417	2.87196	1.52182	1.74704	1.33902	9.61504	8.33671	6.80304	1.87297	191.614
	Seeds
	Ratio of N in seed to N in production
	Wheat	kt seeds/kt veg production	See Le Noe et al., 2018		0.027	0.027	0.027	0.027	0.027	0.027	0.027	0.027	0.027	0.027	0.027	0.027	0.027	0.027	0.027	0.027	0.027	0.027	0.027	0.027	0.027	0.027	0.027	0.027	0.027	0.027	0.027	0.027	0.027	0.027	0.027	0.027	0.027	0.027
	Rye	kt seeds/kt veg production	See Le Noe et al., 2018		0.027	0.027	0.027	0.027	0.027	0.027	0.027	0.027	0.027	0.027	0.027	0.027	0.027	0.027	0.027	0.027	0.027	0.027	0.027	0.027	0.027	0.027	0.027	0.027	0.027	0.027	0.027	0.027	0.027	0.027	0.027	0.027	0.027	0.027
	Barley	kt seeds/kt veg production	See Le Noe et al., 2018		0.027	0.027	0.027	0.027	0.027	0.027	0.027	0.027	0.027	0.027	0.027	0.027	0.027	0.027	0.027	0.027	0.027	0.027	0.027	0.027	0.027	0.027	0.027	0.027	0.027	0.027	0.027	0.027	0.027	0.027	0.027	0.027	0.027	0.027
	Oat	kt seeds/kt veg production	See Le Noe et al., 2018		0.027	0.027	0.027	0.027	0.027	0.027	0.027	0.027	0.027	0.027	0.027	0.027	0.027	0.027	0.027	0.027	0.027	0.027	0.027	0.027	0.027	0.027	0.027	0.027	0.027	0.027	0.027	0.027	0.027	0.027	0.027	0.027	0.027	0.027
	Grain maize	kt seeds/kt veg production	See Le Noe et al., 2018		0.027	0.027	0.027	0.027	0.027	0.027	0.027	0.027	0.027	0.027	0.027	0.027	0.027	0.027	0.027	0.027	0.027	0.027	0.027	0.027	0.027	0.027	0.027	0.027	0.027	0.027	0.027	0.027	0.027	0.027	0.027	0.027	0.027	0.027
	Rice	kt seeds/kt veg production	See Le Noe et al., 2018		0.027	0.027	0.027	0.027	0.027	0.027	0.027	0.027	0.027	0.027	0.027	0.027	0.027	0.027	0.027	0.027	0.027	0.027	0.027	0.027	0.027	0.027	0.027	0.027	0.027	0.027	0.027	0.027	0.027	0.027	0.027	0.027	0.027	0.027
	Other cereals	kt seeds/kt veg production	See Le Noe et al., 2018		0.027	0.027	0.027	0.027	0.027	0.027	0.027	0.027	0.027	0.027	0.027	0.027	0.027	0.027	0.027	0.027	0.027	0.027	0.027	0.027	0.027	0.027	0.027	0.027	0.027	0.027	0.027	0.027	0.027	0.027	0.027	0.027	0.027	0.027
	Straw	kt seeds/kt veg production	See Le Noe et al., 2018		0	0	0	0	0	0	0	0	0	0	0	0	0	0	0	0	0	0	0	0	0	0	0	0	0	0	0	0	0	0	0	0	0	0
	Rapeseed	kt seeds/kt veg production	See Le Noe et al., 2018		0	0	0	0	0	0	0	0	0	0	0	0	0	0	0	0	0	0	0	0	0	0	0	0	0	0	0	0	0	0	0	0	0	0
	Sunflower	kt seeds/kt veg production	See Le Noe et al., 2018		0	0	0	0	0	0	0	0	0	0	0	0	0	0	0	0	0	0	0	0	0	0	0	0	0	0	0	0	0	0	0	0	0	0
	Soybean	kt seeds/kt veg production	See Le Noe et al., 2018		0.027	0.027	0.027	0.027	0.027	0.027	0.027	0.027	0.027	0.027	0.027	0.027	0.027	0.027	0.027	0.027	0.027	0.027	0.027	0.027	0.027	0.027	0.027	0.027	0.027	0.027	0.027	0.027	0.027	0.027	0.027	0.027	0.027	0.027
	Other oil crops	kt seeds/kt veg production	See Le Noe et al., 2018		0.027	0.027	0.027	0.027	0.027	0.027	0.027	0.027	0.027	0.027	0.027	0.027	0.027	0.027	0.027	0.027	0.027	0.027	0.027	0.027	0.027	0.027	0.027	0.027	0.027	0.027	0.027	0.027	0.027	0.027	0.027	0.027	0.027	0.027
	Horse beans and faba beans	kt seeds/kt veg production	See Le Noe et al., 2018		0.027	0.027	0.027	0.027	0.027	0.027	0.027	0.027	0.027	0.027	0.027	0.027	0.027	0.027	0.027	0.027	0.027	0.027	0.027	0.027	0.027	0.027	0.027	0.027	0.027	0.027	0.027	0.027	0.027	0.027	0.027	0.027	0.027	0.027
	Peas	kt seeds/kt veg production	See Le Noe et al., 2018		0.027	0.027	0.027	0.027	0.027	0.027	0.027	0.027	0.027	0.027	0.027	0.027	0.027	0.027	0.027	0.027	0.027	0.027	0.027	0.027	0.027	0.027	0.027	0.027	0.027	0.027	0.027	0.027	0.027	0.027	0.027	0.027	0.027	0.027
	Other protein crops	kt seeds/kt veg production	See Le Noe et al., 2018		0.027	0.027	0.027	0.027	0.027	0.027	0.027	0.027	0.027	0.027	0.027	0.027	0.027	0.027	0.027	0.027	0.027	0.027	0.027	0.027	0.027	0.027	0.027	0.027	0.027	0.027	0.027	0.027	0.027	0.027	0.027	0.027	0.027	0.027
	Sugar beet	kt seeds/kt veg production	See Le Noe et al., 2018		0.056	0.056	0.056	0.056	0.056	0.056	0.056	0.056	0.056	0.056	0.056	0.056	0.056	0.056	0.056	0.056	0.056	0.056	0.056	0.056	0.056	0.056	0.056	0.056	0.056	0.056	0.056	0.056	0.056	0.056	0.056	0.056	0.056	0.056
	Potatoes	kt seeds/kt veg production	See Le Noe et al., 2018		0.056	0.056	0.056	0.056	0.056	0.056	0.056	0.056	0.056	0.056	0.056	0.056	0.056	0.056	0.056	0.056	0.056	0.056	0.056	0.056	0.056	0.056	0.056	0.056	0.056	0.056	0.056	0.056	0.056	0.056	0.056	0.056	0.056	0.056
	Other roots	kt seeds/kt veg production	See Le Noe et al., 2018		0.056	0.056	0.056	0.056	0.056	0.056	0.056	0.056	0.056	0.056	0.056	0.056	0.056	0.056	0.056	0.056	0.056	0.056	0.056	0.056	0.056	0.056	0.056	0.056	0.056	0.056	0.056	0.056	0.056	0.056	0.056	0.056	0.056	0.056
	Green peas	kt seeds/kt veg production	See Le Noe et al., 2018		0.027	0.027	0.027	0.027	0.027	0.027	0.027	0.027	0.027	0.027	0.027	0.027	0.027	0.027	0.027	0.027	0.027	0.027	0.027	0.027	0.027	0.027	0.027	0.027	0.027	0.027	0.027	0.027	0.027	0.027	0.027	0.027	0.027	0.027
	Dry beans	kt seeds/kt veg production	See Le Noe et al., 2018		0.027	0.027	0.027	0.027	0.027	0.027	0.027	0.027	0.027	0.027	0.027	0.027	0.027	0.027	0.027	0.027	0.027	0.027	0.027	0.027	0.027	0.027	0.027	0.027	0.027	0.027	0.027	0.027	0.027	0.027	0.027	0.027	0.027	0.027
	Green beans	kt seeds/kt veg production	See Le Noe et al., 2018		0.027	0.027	0.027	0.027	0.027	0.027	0.027	0.027	0.027	0.027	0.027	0.027	0.027	0.027	0.027	0.027	0.027	0.027	0.027	0.027	0.027	0.027	0.027	0.027	0.027	0.027	0.027	0.027	0.027	0.027	0.027	0.027	0.027	0.027
	Dry vegetables	kt seeds/kt veg production	See Le Noe et al., 2018		0.027	0.027	0.027	0.027	0.027	0.027	0.027	0.027	0.027	0.027	0.027	0.027	0.027	0.027	0.027	0.027	0.027	0.027	0.027	0.027	0.027	0.027	0.027	0.027	0.027	0.027	0.027	0.027	0.027	0.027	0.027	0.027	0.027	0.027
	Dry fruits	kt seeds/kt veg production	See Le Noe et al., 2018		0.027	0.027	0.027	0.027	0.027	0.027	0.027	0.027	0.027	0.027	0.027	0.027	0.027	0.027	0.027	0.027	0.027	0.027	0.027	0.027	0.027	0.027	0.027	0.027	0.027	0.027	0.027	0.027	0.027	0.027	0.027	0.027	0.027	0.027
	Squash and melons	kt seeds/kt veg production	See Le Noe et al., 2018		0	0	0	0	0	0	0	0	0	0	0	0	0	0	0	0	0	0	0	0	0	0	0	0	0	0	0	0	0	0	0	0	0	0
	Cabbage	kt seeds/kt veg production	See Le Noe et al., 2018		0	0	0	0	0	0	0	0	0	0	0	0	0	0	0	0	0	0	0	0	0	0	0	0	0	0	0	0	0	0	0	0	0	0
	Leaves vegetables	kt seeds/kt veg production	See Le Noe et al., 2018		0	0	0	0	0	0	0	0	0	0	0	0	0	0	0	0	0	0	0	0	0	0	0	0	0	0	0	0	0	0	0	0	0	0
	Fruits	kt seeds/kt veg production	See Le Noe et al., 2018		0	0	0	0	0	0	0	0	0	0	0	0	0	0	0	0	0	0	0	0	0	0	0	0	0	0	0	0	0	0	0	0	0	0
	Olives	kt seeds/kt veg production	See Le Noe et al., 2018		0	0	0	0	0	0	0	0	0	0	0	0	0	0	0	0	0	0	0	0	0	0	0	0	0	0	0	0	0	0	0	0	0	0
	Citrus	kt seeds/kt veg production	See Le Noe et al., 2018		0	0	0	0	0	0	0	0	0	0	0	0	0	0	0	0	0	0	0	0	0	0	0	0	0	0	0	0	0	0	0	0	0	0
	Hemp	kt seeds/kt veg production	See Le Noe et al., 2018		0	0	0	0	0	0	0	0	0	0	0	0	0	0	0	0	0	0	0	0	0	0	0	0	0	0	0	0	0	0	0	0	0	0
	Flax	kt seeds/kt veg production	See Le Noe et al., 2018		0	0	0	0	0	0	0	0	0	0	0	0	0	0	0	0	0	0	0	0	0	0	0	0	0	0	0	0	0	0	0	0	0	0
	Forage maize	kt seeds/kt veg production	See Le Noe et al., 2018		0.027	0.027	0.027	0.027	0.027	0.027	0.027	0.027	0.027	0.027	0.027	0.027	0.027	0.027	0.027	0.027	0.027	0.027	0.027	0.027	0.027	0.027	0.027	0.027	0.027	0.027	0.027	0.027	0.027	0.027	0.027	0.027	0.027	0.027
	Forage cabbages	kt seeds/kt veg production	See Le Noe et al., 2018		0	0	0	0	0	0	0	0	0	0	0	0	0	0	0	0	0	0	0	0	0	0	0	0	0	0	0	0	0	0	0	0	0	0
	Alfalfa and clover	kt seeds/kt veg production	See Le Noe et al., 2018		0	0	0	0	0	0	0	0	0	0	0	0	0	0	0	0	0	0	0	0	0	0	0	0	0	0	0	0	0	0	0	0	0	0
	N inputs through seeds
	Wheat	ktN/yr			0	0	0	0	0	0	0	0	0	0	0	0	0	0	0	0	0	0	0	0	0	0	0	0	0	0	0	0	0	0	0	0	0	0
	Rye	ktN/yr			0	0	0	0	0	0	0	0	0	0	0	0	0	0	0	0	0	0	0	0	0	0	0	0	0	0	0	0	0	0	0	0	0	0
	Barley	ktN/yr			0	0	0	0	0	0	0	0	0	0	0	0	0	0	0	0	0	0	0	0	0	0	0	0	0	0	0	0	0	0	0	0	0	0
	Oat	ktN/yr			0	0	0	0	0	0	0	0	0	0	0	0	0	0	0	0	0	0	0	0	0	0	0	0	0	0	0	0	0	0	0	0	0	0
	Grain maize	ktN/yr			0	0	0	0	0	0	0	0	0	0	0	0	0	0	0	0	0	0	0	0	0	0	0	0	0	0	0	0	0	0	0	0	0	0
	Rice	ktN/yr			0	0	0	0	0	0	0	0	0	0	0	0	0	0	0	0	0	0	0	0	0	0	0	0	0	0	0	0	0	0	0	0	0	0
	Other cereals	ktN/yr			0	0	0	0	0	0	0	0	0	0	0	0	0	0	0	0	0	0	0	0	0	0	0	0	0	0	0	0	0	0	0	0	0	0
	Straw	ktN/yr			0	0	0	0	0	0	0	0	0	0	0	0	0	0	0	0	0	0	0	0	0	0	0	0	0	0	0	0	0	0	0	0	0	0
	Rapeseed	ktN/yr			0	0	0	0	0	0	0	0	0	0	0	0	0	0	0	0	0	0	0	0	0	0	0	0	0	0	0	0	0	0	0	0	0	0
	Sunflower	ktN/yr			0	0	0	0	0	0	0	0	0	0	0	0	0	0	0	0	0	0	0	0	0	0	0	0	0	0	0	0	0	0	0	0	0	0
	Soybean	ktN/yr			0	0	0	0	0	0	0	0	0	0	0	0	0	0	0	0	0	0	0	0	0	0	0	0	0	0	0	0	0	0	0	0	0	0
	Other oil crops	ktN/yr			0	0	0	0	0	0	0	0	0	0	0	0	0	0	0	0	0	0	0	0	0	0	0	0	0	0	0	0	0	0	0	0	0	0
	Horse beans and faba beans	ktN/yr			0	0	0	0	0	0	0	0	0	0	0	0	0	0	0	0	0	0	0	0	0	0	0	0	0	0	0	0	0	0	0	0	0	0
	Peas	ktN/yr			0	0	0	0	0	0	0	0	0	0	0	0	0	0	0	0	0	0	0	0	0	0	0	0	0	0	0	0	0	0	0	0	0	0
	Other protein crops	ktN/yr			0	0	0	0	0	0	0	0	0	0	0	0	0	0	0	0	0	0	0	0	0	0	0	0	0	0	0	0	0	0	0	0	0	0
	Sugar beet	ktN/yr			0	0	0	0	0	0	0	0	0	0	0	0	0	0	0	0	0	0	0	0	0	0	0	0	0	0	0	0	0	0	0	0	0	0
	Potatoes	ktN/yr			0	0	0	0	0	0	0	0	0	0	0	0	0	0	0	0	0	0	0	0	0	0	0	0	0	0	0	0	0	0	0	0	0	0
	Other roots	ktN/yr			0	0	0	0	0	0	0	0	0	0	0	0	0	0	0	0	0	0	0	0	0	0	0	0	0	0	0	0	0	0	0	0	0	0
	Green peas	ktN/yr			0	0	0	0	0	0	0	0	0	0	0	0	0	0	0	0	0	0	0	0	0	0	0	0	0	0	0	0	0	0	0	0	0	0
	Dry beans	ktN/yr			0	0	0	0	0	0	0	0	0	0	0	0	0	0	0	0	0	0	0	0	0	0	0	0	0	0	0	0	0	0	0	0	0	0
	Green beans	ktN/yr			0	0	0	0	0	0	0	0	0	0	0	0	0	0	0	0	0	0	0	0	0	0	0	0	0	0	0	0	0	0	0	0	0	0
	Dry vegetables	ktN/yr			0	0	0	0	0	0	0	0	0	0	0	0	0	0	0	0	0	0	0	0	0	0	0	0	0	0	0	0	0	0	0	0	0	0
	Dry fruits	ktN/yr			0	0	0	0	0	0	0	0	0	0	0	0	0	0	0	0	0	0	0	0	0	0	0	0	0	0	0	0	0	0	0	0	0	0
	Squash and melons	ktN/yr			0	0	0	0	0	0	0	0	0	0	0	0	0	0	0	0	0	0	0	0	0	0	0	0	0	0	0	0	0	0	0	0	0	0
	Cabbage	ktN/yr			0	0	0	0	0	0	0	0	0	0	0	0	0	0	0	0	0	0	0	0	0	0	0	0	0	0	0	0	0	0	0	0	0	0
	Leaves vegetables	ktN/yr			0	0	0	0	0	0	0	0	0	0	0	0	0	0	0	0	0	0	0	0	0	0	0	0	0	0	0	0	0	0	0	0	0	0
	Fruits	ktN/yr			0	0	0	0	0	0	0	0	0	0	0	0	0	0	0	0	0	0	0	0	0	0	0	0	0	0	0	0	0	0	0	0	0	0
	Olives	ktN/yr			0	0	0	0	0	0	0	0	0	0	0	0	0	0	0	0	0	0	0	0	0	0	0	0	0	0	0	0	0	0	0	0	0	0
	Citrus	ktN/yr			0	0	0	0	0	0	0	0	0	0	0	0	0	0	0	0	0	0	0	0	0	0	0	0	0	0	0	0	0	0	0	0	0	0
	Hemp	ktN/yr			0	0	0	0	0	0	0	0	0	0	0	0	0	0	0	0	0	0	0	0	0	0	0	0	0	0	0	0	0	0	0	0	0	0
	Flax	ktN/yr			0	0	0	0	0	0	0	0	0	0	0	0	0	0	0	0	0	0	0	0	0	0	0	0	0	0	0	0	0	0	0	0	0	0
	Forage maize	ktN/yr			0	0	0	0	0	0	0	0	0	0	0	0	0	0	0	0	0	0	0	0	0	0	0	0	0	0	0	0	0	0	0	0	0	0
	Forage cabbages	ktN/yr			0	0	0	0	0	0	0	0	0	0	0	0	0	0	0	0	0	0	0	0	0	0	0	0	0	0	0	0	0	0	0	0	0	0
	Alfalfa and clover	ktN/yr			0	0	0	0	0	0	0	0	0	0	0	0	0	0	0	0	0	0	0	0	0	0	0	0	0	0	0	0	0	0	0	0	0	0
	Total N inputs through seeds to cropland				0	0	0	0	0	0	0	0	0	0	0	0	0	0	0	0	0	0	0	0	0	0	0	0	0	0	0	0	0	0	0	0	0	0
	Vegetal production
	Crop and grassland Production
	Wheat	ktonDFW/yr			2373.16	1796.02	1328.74	6150.87	2060.63	793.582	474.943	3248.47	3485.55	1492.12	1763.51	435.515	1877.85	1823.08	3399.09	6382.89	1997.32	184.521	23.8406	254.217	187.555	389.147	66.5793	4417.38	48.4016	103.432	13.6642	277.978	55.8336	175.096	366.083	274.152	25.4656	47746.7
	Rye	ktonDFW/yr			5.79436	0.592911	14.043	5.34246	3.01303	0.266687	0.0932158	1.28186	2.9881	7.10521	6.20724	1.00279	1.97857	2.85418	9.63546	35.9728	40.0824	5.07274	0.393567	2.6469	2.45222	5.89162	7.58999	2.90389	0.400249	0.297907	0.347	1.18991	6.65963	0.552142	0.585841	0.11134	3.73443	179.084
	Barley	ktonDFW/yr			749.378	357.129	392.875	1140.32	382.75	189.342	66.4602	688.552	2050.36	1072.99	1139.56	43.1364	417.02	349.51	448.833	1948.97	694.58	92.9252	13.5351	69.4649	70.1389	122.164	138.199	600.944	8.24496	23.453	2.57427	119.572	16.8647	9.7577	16.8073	19.3845	2.03591	13457.8
	Oat	ktonDFW/yr			23.9332	8.60559	6.26434	30.4825	61.4337	4.4977	4.62523	24.0435	28.7836	25.5797	22.1782	3.83257	50.4322	12.0909	44.5868	67.3151	54.287	4.29186	0.389918	4.50487	8.42892	5.61228	8.69405	37.3345	1.77685	1.96848	0.452048	10.1851	2.68718	0.610724	1.69157	1.64062	2.80207	566.043
	Grain maize	ktonDFW/yr			522.07	88.761	210.913	588.952	145.423	30.5155	114.962	294.282	477.115	190.509	273.528	2061.88	1041.74	1394.65	1204.54	1903.85	1034.66	158.709	61.8387	519.515	54.4868	562.329	10.6996	3006.53	438.832	2184.23	977.63	406.325	28.9097	27.6583	80.5983	13.1365	4.58868	20114.4
	Rice	ktonDFW/yr			0	0	0	0	0	0	0	0	0	0	0	0	0	0	0	0	0	0	0	0	0	0	0	2.08326	0	0	0	0	0	109.5	526.126	41.4337	0	679.143
	Other cereals	ktonDFW/yr			16.1018	6.86319	8.87856	17.6571	74.0004	6.23362	28.0289	21.6638	32.5207	65.6492	88.1748	19.0229	313.921	110.138	403.765	346.444	651.784	27.6987	6.75609	41.1289	36.6989	76.9264	117.03	488.232	9.87186	52.9539	8.46945	116.248	73.9332	8.87541	27.7971	15.0889	8.41535	3326.97
	Straw	ktonDFW/yr			157.766	357.74	89.7163	1236.32	1433.34	352.837	357.103	1289.46	992.373	945.566	1203.67	169.917	1902.44	1053.97	2406.99	1813.95	1765.43	185.228	36.4932	185.459	131.142	261.988	269.023	1311.46	30.5497	109.811	14.7915	266.959	114.985	18.0341	79.2598	61.2002	27.7747	20632.8
	Rapeseed	ktonDFW/yr			330.23	365.398	270.797	470.006	199.52	65.9747	48.0195	290.278	619.85	489.536	426.953	45.9002	100.399	148.075	424.404	962.063	214.675	22.1605	4.39154	19.8926	18.2344	24.144	25.3735	205.487	3.60366	8.23545	2.30189	15.5701	0.637709	3.05634	11.8926	3.55029	0	5840.61
	Sunflower	ktonDFW/yr			12.637	1.21187	2.07873	3.28324	4.01952	0.0667979	0	18.5171	52.8068	43.1544	14.5032	1.64994	35.4307	230.759	181.475	332.346	76.4562	7.62742	2.65508	11.3868	24.5648	31.6858	92.2106	849.847	12.2464	9.45109	8.34636	44.6159	2.2952	14.2556	47.7437	8.75319	0.0997178	2178.18
	Soybean	ktonDFW/yr			0.145931	0.0235166	0.0214229	0.0386774	0	0	0	0.0822746	1.88463	11.7008	3.53002	3.93496	0.0753155	0.57202	0.676366	3.97774	14.1004	6.72492	1.24562	4.70988	3.90679	4.98191	7.48293	125.264	1.46427	5.04129	1.30133	1.8911	0.0315369	0.152753	0.848106	0.0499729	0	205.861
	Other oil crops	ktonDFW/yr			1.49765	2.04271	1.61545	3.70567	0.559172	0.0891761	0.0374877	0.696134	2.78459	5.97297	0.795624	0.345782	2.55465	3.04067	5.56968	8.38514	1.14494	0.0248552	0	0.0241629	0.128854	0.0209487	0.495128	1.62006	0.108081	0.054142	0.0599141	0.151963	0.0203355	0.0422574	0.123749	0.00853259	0.00997178	43.7304
	Horse beans and faba beans	ktonDFW/yr			98.5953	23.5105	3.0127	137.717	26.6241	13.6302	1.38656	40.6127	29.4103	3.72716	4.87545	0.205672	4.83565	4.21126	10.8865	15.3231	3.14198	0.522816	0.00893807	0.150372	0.60012	0.266508	0.0338286	23.7722	0.403324	0.928301	0.122164	1.4434	0.0265612	0.290973	0.348889	0.117219	0.0408843	450.782
	Peas	ktonDFW/yr			122.836	81.6093	55.3913	211.543	71.7727	16.0182	2.12426	48.0324	135.026	25.7786	19.4223	0.655297	17.3273	42.6057	55.8543	104.629	17.8401	0.499422	0.219332	2.10025	6.94777	7.68293	0.348955	59.2651	0.750609	0.838727	0.404377	1.31911	0.119586	1.47306	4.32308	1.95537	0.376435	1117.09
	Other protein crops	ktonDFW/yr			0.462796	0.183723	0.471637	0.179308	0.3502	0.0688451	0.137091	0.00750225	0.0431417	0.0365587	0.12999	0.0626845	1.58579	1.29604	4.46115	3.78441	0.91071	0.0821094	0.00648423	0.177786	0.0110928	0.146494	0.031641	0.596569	0.0645319	0.576473	0.0357095	0.353981	0.0176674	0	0	0.00247133	0	16.2746
	Sugar beet	ktonDFW/yr			4255.78	1250.47	523.768	15061.4	1098.35	775.276	4.39446	6319.55	7202.2	147.088	7.34624	721.607	2.52029	1.47035	48.6807	2161.69	550.248	23.4142	0	0	0	0	0	3.55886	0.310642	0	1.67899	2.23925	0	0	0	0	0	40163.1
	Potatoes	ktonDFW/yr			226.434	186.841	272.164	2698.83	58.0551	327.153	24.7895	2949.95	812.634	34.5229	15.8041	69.7832	267.099	28.7267	17.5905	241.151	50.2928	1.69284	6.9706	18.7477	17.6275	16.0823	5.05752	56.5175	23.5567	2.25254	12.2058	3.33189	2.93195	24.1976	78.7099	24.1524	60.7155	8636.57
	Other roots	ktonDFW/yr			2.46588e-10	2.93957e-10	1.3911e-10	2.22412e-10	2.67023e-10	1.40214e-10	2.87703e-10	2.50075e-10	1.62187e-10	2.39729e-10	1.67945e-10	2.33985e-10	1.46528e-10	1.67753e-10	1.98098e-10	2.20797e-10	2.41273e-10	1.58819e-10	1.27142e-10	1.47785e-10	4.43711e-10	1.8376e-10	1.58522e-10	3.1047e-10	2.36554e-10	3.15513e-10	1.34246e-10	2.36887e-10	2.40373e-10	2.39012e-10	1.40624e-09	2.6014e-10	1.66196e-09	9.88652e-09
	Green peas	ktonDFW/yr			0.711602	0.0880107	4.97109	66.6575	0.054259	0.015087	0.100495	143.744	0.518641	1.55244	0.0309187	0.063246	53.9033	1.7205	0.478406	2.42236	2.49737	1.77609	0.0125108	0.181599	0.0244929	0.216268	0.00264732	4.46298	0.892304	1.3686	3.52913	0.152437	0.010312	0.202419	1.09209	0.361907	0.20841	294.023
	Dry beans	ktonDFW/yr			1.83422	0.152387	2.30637	11.533	0.015247	0.0143439	0.029691	6.91069	0.437239	0.121303	0.00396351	0.0134775	15.9585	0.724607	0.552396	0.688312	0.471159	0.309411	0	0.0111135	0.00838615	0.0684508	0	0.421867	0.66034	1.28467	0.225668	0.0277158	0.00737945	0.186692	0.741512	0.123749	0.0817686	45.9256
	Green beans	ktonDFW/yr			7.35166	0.372002	6.46624	69.9653	0.188278	0.128983	0.575205	83.1648	0.134761	3.20719	0.155081	0.40112	90.3724	3.52239	7.34652	5.18764	4.66989	3.2187	0.240018	0.937255	0.201134	0.442532	0.0277097	15.3073	33.5019	19.268	33.2133	1.06874	0.127422	1.48047	7.25186	0.822276	0.847602	401.166
	Dry vegetables	ktonDFW/yr			0.264687	0.0278083	0.383108	0.197746	0	0	0.00115081	1.98672	3.8509	0.286284	0.0532218	0.00210586	0	2.68471	0.650157	7.86847	5.27655	0	0	0.00115273	0.162043	0.171081	0.0346212	6.34567	0.00849228	0.355583	0.0445295	0.0333774	0.0638431	0.0242358	0	3.6553	0.0631546	34.4967
	Dry fruits	ktonDFW/yr			0.124971	0.0287784	0	0.00120102	0.0694259	0	0.00845847	0.00127538	0.0743951	0	0.0325814	0.0417896	0.00964156	2.01169	0.626188	0.618452	0.511355	0.00986266	0.0939832	0.0240595	0.477034	23.8657	0.48633	13.1914	0.634863	0.525108	0.0688415	18.0388	2.56629	0.408137	0.86484	0.907524	0.885328	67.2082
	Squash and melons	ktonDFW/yr			10.6113	1.55297	0.527531	1.83714	0.774606	1.96012	2.16272	24.1036	13.5727	3.37443	12.8768	5.05547	16.235	34.8087	71.9421	93.619	4.43832	0.272438	1.92275	8.21161	46.5546	22.2193	0.0718581	182.259	6.27109	5.49128	1.2473	16.3704	0.757511	202.628	374.115	116.662	143.654	1428.16
	Cabbage	ktonDFW/yr			10.1961	2.13868	0.556327	1.61698	3.89826	2.30034	53.4946	113.499	13.9763	3.02054	0.64491	75.8198	280.659	4.92681	14.3666	6.51839	2.7974	0.430717	0.684099	6.60387	0.703416	3.17001	0.103071	15.9288	0.417754	3.61865	0.461405	0.324299	0.13307	13.0811	67.5523	1.80597	4.14876	709.597
	Leaves vegetables	ktonDFW/yr			60.7457	6.00936	2.82493	283.346	17.042	6.32458	84.5717	613.039	24.3252	8.2265	1.99737	12.4481	130.042	14.6948	107.701	51.4042	18.7651	0.663212	3.59437	41.7609	16.4461	14.3691	0.522695	72.6031	10.9761	6.92654	3.70293	3.77006	0.931493	154.334	603.959	40.6415	537.549	2956.26
	Fruits	ktonDFW/yr			22.8056	51.0542	7.16816	73.4939	151.47	18.547	40.7435	32.1707	14.5002	2.90468	23.4402	34.04	55.6959	37.4466	446.543	176.093	83.2111	0.750658	19.4618	33.8967	458.981	248.831	1.7724	1090.07	36.2633	27.8771	13.6401	149.047	90.2714	635.302	1754.57	319.213	1110.87	7262.14
	Olives	ktonDFW/yr			0	0	0	0	0	0	0	0	0	0	0	0	0	0.00166075	0	0	0	0	0	0	4.69735	2.32281	0	1.76791	0	0	0	0	0	15.7264	87.7927	10.8034	6.61462	129.727
	Citrus	ktonDFW/yr			0	0	0	0	0	0	0	0	0	0	0	0	0	0	0	0	0	0	0	0	0	0	0	0	0	0	0	0	0	0	1.91446	0	0	1.91446
	Hemp	ktonDFW/yr			3.32232	1.719	0.0683723	0	0.736662	0.00748743	0	0	30.3908	2.69779	4.91089	0.0561563	0.586978	1.10802	12.0593	1.10356	0.178784	1.22235	0	0	0	0.0807811	0.0263939	9.90481	0	1.46098	0	0.4399	0.0151435	0	0	0.0766372	0	72.1732
	Flax	ktonDFW/yr			16.1999	166.07	1.85571	86.8093	69.3883	130.958	0.0231313	120.961	2.74988	0.0354799	0.100767	0	0.0266828	0	0	0.232698	0	0	0	0	0	0	0.0190227	0.391193	0	0	0	0.0105178	0	0	0	0	0	595.832
	Forage maize	ktonDFW/yr			40.8835	220.108	31.9367	930.722	1928.01	463.611	1992.06	1515.28	333.612	379.339	1065.97	262.547	3634.69	1074.95	3546.96	537.489	1364.05	105.5	30.793	235.338	36.8152	171.854	177.916	826.253	66.4137	806.699	74.7973	345.453	156.491	14.7084	77.561	5.58388	16.0135	22470.4
	Forage cabbages	ktonDFW/yr			4.8543	3.84712	2.11157	10.0641	7.64073	1.93977	4.40917	6.99747	9.1146	6.26418	8.02229	2.6486	8.38754	7.32491	14.7619	18.0487	24.1258	2.4764	1.12547	2.05796	6.11801	4.08591	4.10715	21.6993	2.15357	6.98198	0.97858	4.8158	4.80411	2.22294	10.4671	3.32288	7.42737	225.407
	Alfalfa and clover	ktonDFW/yr			26.9706	52.7559	5.73515	79.8251	26.2536	3.80257	19.831	21.0261	734.854	111.386	69.5134	18.0611	36.7607	124.869	167.014	174.013	223.908	15.7803	9.82964	28.352	272.717	153.779	102.805	584.793	9.54411	34.0478	1.05742	129.919	13.1541	49.8543	226.297	42.6802	23.804	3594.99
	Non-legume temporary meadow	ktonDFW/yr			40.1157	95.5453	26.681	149.443	669.522	144.293	1031.25	181.945	141.029	234.568	426.858	119.762	3451.88	1671.24	4496.22	2013.82	4775.73	407.052	109.921	315.782	295.13	225.527	1443.53	2398.03	60.8758	1389.3	79.6003	975.569	941.052	29.7603	85.2002	49.3425	13.7636	28489.3
	Natural meadow	ktonDFW/yr			0	1.57888e-08	0	0	1896.79	941.54	1290.24	0	0	0	4044.53	0	908.608	1560.34	2481.45	0	10865.7	1931.1	993.372	1288.06	990.917	1226.51	1746.63	2375.18	0	1366.67	0	1309.21	2515.12	0	0	0	0	39731.9
	Cereal Yield
	Wheat	ton/ha/yr			2.78486	4.31081	1.59543	4.16087	4.65347	1.95647	8.81338	4.69727	1.94582	1.48478	1.77365	2.52004	3.30327	1.53986	1.31177	3.0957	1.41309	1.64891	3.69149	1.00886	4.62705	1.94154	2.98877	1.85579	0.79383	2.59048	0.674394	2.84128	3.91577	1.27634	1.95064	1.12372	5.30963	2.71512
	Rye	ton/ha/yr			4.50189	6.42533	1.5462	2.93551	4.81197	2.8317	4.9241	5.07161	1.48112	1.82285	1.59538	1.40921	3.01711	2.43937	1.12859	2.60574	1.03521	1.17792	2.31043	0.690226	4.99128	1.217	2.10535	1.67409	0.568235	13.633	0.787798	2.56952	3.65031	1.42856	28.0632	1.08342	5.37967	3.66403
	Barley	ton/ha/yr			2.83009	4.87516	1.52878	4.16771	3.95902	2.04452	6.26918	6.12555	1.72392	1.30706	1.50061	2.34574	2.66001	1.30933	0.975261	2.44931	1.31945	1.41737	3.36559	0.94695	4.37992	1.80153	3.75521	1.3489	0.936433	2.46616	0.438329	2.64247	3.71925	0.663771	1.33407	0.584586	2.22491	2.40655
	Oat	ton/ha/yr			2.93178	4.59723	1.3025	2.48677	3.66092	1.5919	7.3298	3.92576	0.764585	0.702303	0.898332	1.3594	2.33266	1.21214	1.19366	1.90821	0.893432	1.10064	1.64522	0.700318	3.1117	1.26681	2.21757	1.24497	1.03491	2.13467	0.473672	1.96575	4.21416	0.501721	0.900337	0.443459	2.01827	1.94138
	Grain maize	ton/ha/yr			3.40582	5.77765	2.15622	5.02982	6.17682	2.02886	13.5959	5.98732	2.13993	1.9087	2.07652	3.87852	3.31993	1.98726	1.34934	3.06224	1.64832	1.69199	4.74404	1.32574	11.9575	2.67876	3.97268	2.91455	1.4869	3.86336	1.03474	4.25394	5.62811	2.28636	5.63217	1.19021	7.34474	3.8647
	Rice	ton/ha/yr			0	0	0	0	0	0	0	0	0	0	0	0	0	0	0	0	0	0	0	0	0	0	0	2.08408	0	0	0	0	0	2.15154	4.39992	1.8026	0	0.316307
	Other cereals	ton/ha/yr			2.38445	6.67475	1.89988	3.45411	3.60312	2.23109	9.71962	5.33845	1.04819	1.24682	1.4716	2.19395	2.98074	1.04286	0.926771	1.81503	1.03408	1.44608	4.36465	0.798747	5.16923	1.66651	2.42997	1.29487	0.859165	1.99713	0.50712	2.48389	3.94895	0.87739	2.09034	1.00796	5.44289	2.58941
	Surface
	Wheat	Hectares			263907	196756	228778	673753	259917	154807	61753.9	366334	586426	252493	346307	53204.6	337200	310423	512142	1.02239e+06	311742	26787.6	1981.12	40447.2	24168.9	69873.3	14407.5	528672	11265.5	11108.7	3073.5	47140.3	10452.4	67152	42532.5	107126	9462.2
	Rye	Hectares			581.579	58.6254	2182.29	528.182	343.018	46.9548	10.9393	130.472	453.748	1085.18	1100.17	110.569	320.669	438.637	1310.32	5200.59	5646.49	664.673	29.5182	380.1	285.211	954.795	1482.41	313.675	84.0811	28.8779	70.4457	182.126	1125.25	191.122	61.4326	39.2675	1252.39
	Barley	Hectares			75214.9	35311.9	61052.8	112737	43574.2	33336.9	7799.41	70083.1	311351	163877	201975	4756.29	67586.8	53713.7	61036.7	281763	97847	12175.8	1015.15	9975.32	8157.67	19797.8	26991.8	64913.3	1732.04	2273.44	522.611	18301.6	2849.54	3377.59	1762.45	6836.57	682.769
	Oat	Hectares			2838.93	1005.6	1150.48	3561.59	8265.53	935.878	641.482	2892.18	5165.54	4617.1	4645.56	499.419	9659.7	2196.01	7165.76	11501.2	9037.99	664.602	34.5617	764.529	1158.59	1074.89	2006.78	4766.08	441.133	225.511	108.458	1842.36	536.593	249.836	209.633	683.821	1110.57
	Grain maize	Hectares			45254.6	7579.64	28306.4	50286.7	14298.1	4640.13	11651.6	25868.5	62571.2	25128.7	41869	196344	145813	185107	141468	237708	125879	17959.7	4005.54	64430.4	5473.05	78704.1	1804.79	280477	79615.5	182858	171408	53711.1	4218.64	8268.29	7299.21	4001.24	1329.03
	rice	Hectares			0	0	0	0	0	0	0	0	0	0	0	0	0	0	0	0	0	0	0	0	0	0	0	136.809	0	0	0	0	0	23043.3	33541.3	8883.98	0
	Other cereals	Hectares			1652.87	694.035	1411.09	1785.34	8616.03	1122.48	3364.09	2255.12	5050.57	10254.4	15983.2	2145.17	52033.8	17311	56155.8	51223.8	93905.1	3711.81	518.234	6040.44	4365.37	12750	23376.7	53936.9	2120.93	5249.81	1758.49	18197.2	12776.1	3142.01	2981.11	5442.53	2886.35
	Straw	Hectares			4498.57	10048.9	3960.78	34724	46357.7	17648.6	11905.6	37285.6	42810.7	41027.2	60607.1	5322.53	87594	46016.3	92990.3	74501	70653.4	6894.92	777.571	7566	4333.17	12061.9	14927	40245	1823.19	3024.04	853.089	11608.1	5519.45	1773.42	2361.18	6131.87	2646.21
	Rapeseed	Hectares			65913.6	71848.5	83685.7	92406.3	45170.6	23100	11206.6	58755.1	187181	148684	150486	10064.5	32358.6	45254.5	114773	276591	60139.8	5774.33	655.002	5680.8	4217.48	7781.09	9855.15	44140.7	1505.45	1587.55	929.321	4739.2	214.277	2103.86	2480	2490.01	0
	Sunflower	Hectares			1412.51	133.442	359.743	361.483	509.602	13.0974	0	2098.91	8930.05	7339.92	2862.64	202.598	6394.82	39493.7	27483.1	53507.3	11994.5	1112.98	221.764	1820.98	3181.74	5718.52	20056.3	102231	2864.97	1020.26	1886.97	7604.88	431.879	5495.28	5575.43	3437.89	37.242
	Soybean	Hectares			49.933	7.92699	11.3493	13.0358	0	0	0	28.5483	975.628	6092.22	2132.93	1479.12	41.6129	299.691	313.564	1960.44	6771.67	3003.94	318.489	2305.74	1549.05	2752.39	4982.39	46128.1	1048.64	1665.97	900.64	986.759	18.1659	180.255	303.185	60.0836	0
	Other oil crops	Hectares			298.929	401.659	499.23	728.558	126.594	31.2235	8.74873	140.904	840.885	1814.13	280.429	75.8197	823.363	929.285	1506.23	2410.71	320.747	6.47646	0	6.90027	29.803	6.75131	192.309	348.007	45.1517	10.437	24.1885	46.2544	6.83296	29.0882	25.8058	5.98438	6.65035
	Horse beans and faba beans	Hectares			19679.5	4622.88	931.026	27076	6027.58	4772.37	323.589	8220.42	8881.28	1132.03	1718.42	45.0978	1558.53	1287.04	2944.08	4405.35	880.207	136.229	1.33312	42.942	138.804	85.8897	13.1391	5106.53	168.491	178.949	49.3201	439.341	8.92485	200.294	72.7548	82.2122	27.2664
	Peas	Hectares			25218.5	16505.4	17606.9	42779	16713.3	5768.75	509.915	10000	41939.9	8053.26	7041.27	147.792	5744.15	13393.1	15536.5	30940	5140.58	133.851	33.6483	616.911	1652.88	2546.79	139.408	13094.5	322.531	166.301	167.919	412.98	41.3301	1042.96	927.26	1410.59	258.224
	Other protein crops	Hectares			95.0128	37.1578	149.916	36.2604	81.5492	24.7937	32.9077	1.56192	13.4001	11.421	47.1258	14.1375	525.702	407.411	1240.92	1119.1	262.419	22.0064	0.994761	52.2214	2.63899	48.5607	12.6406	131.811	27.7289	114.302	14.8286	110.823	6.10605	0	0	1.7828	0
	Sugar beet	Hectares			50481.6	14612.4	9619.25	175978	14777.7	16131.9	60.9477	76017.5	129252	2654.91	153.878	9403.19	48.2732	26.7052	782.373	36933.8	9160.83	362.574	0	0	0	0	0	45.432	7.71222	0	40.2832	40.5053	0	0	0	0	0
	Potatoes	Hectares			3305.77	2687.17	6151.91	38810.2	961.349	8378.31	423.151	43673.5	17949.1	766.933	407.434	1119.19	6296.58	642.153	347.945	5071.01	1030.52	32.2632	76.0445	391.595	298.213	379.098	143.679	887.994	719.796	31.7603	360.427	74.1784	72.0579	1218.31	1200.54	1239	2961.72
	Other roots	Hectares			3.23437e-09	3.79835e-09	2.82503e-09	2.87353e-09	3.97262e-09	3.22615e-09	4.41225e-09	3.3263e-09	3.21848e-09	4.78474e-09	3.88994e-09	3.37153e-09	3.10343e-09	3.36906e-09	3.52047e-09	4.17145e-09	4.44171e-09	2.71946e-09	1.24616e-09	2.77337e-09	6.74409e-09	3.89173e-09	4.04606e-09	4.38263e-09	6.49401e-09	3.99685e-09	3.56158e-09	4.73823e-09	5.30761e-09	1.08117e-08	1.92706e-08	1.19896e-08	7.28372e-08
	Green peas	Hectares			20.2907	2.47223	219.463	1872.18	1.75486	0.754639	3.35044	4156.45	22.3741	67.3588	1.55682	1.98114	2481.86	75.1169	18.4825	99.4891	99.9462	66.1131	0.26657	7.40852	0.80929	9.95691	0.14689	136.956	53.2523	37.6894	203.54	6.62837	0.494992	19.9053	32.5338	36.2607	19.856
	Dry beans	Hectares			156.903	12.8417	305.463	971.766	1.47937	2.1524	2.96964	599.483	56.5872	15.7897	0.598712	1.26652	2204.33	94.9087	64.0229	84.8092	56.568	34.5525	0	1.36016	0.831282	9.45437	0	38.8378	118.226	106.135	39.0457	3.61548	1.06267	55.0763	66.2698	37.1964	23.3712
	Green beans	Hectares			209.626	10.4496	285.47	1965.09	6.08933	6.4516	19.177	2404.77	5.81356	139.157	7.80863	12.5648	4161	153.787	283.821	213.062	186.892	119.813	5.11413	38.2364	6.64586	20.3741	1.5375	469.739	1999.38	530.615	1915.55	46.4718	6.11644	145.584	216.036	82.3868	80.7543
	Dry vegetables	Hectares			54.3407	5.6242	121.776	39.989	0	0	0.276245	413.621	1196.11	89.4356	19.2948	0.474945	0	843.941	180.848	2326.8	1520.43	0	0	0.338593	38.5504	56.711	13.8312	1402.06	3.64907	70.5044	18.4911	10.4497	22.0649	17.1596	0	2636.91	43.3223
	Dry fruits	Hectares			14.2537	3.23355	0	0.134931	8.98157	0	1.128	0.147514	12.8375	0	6.56216	5.23613	1.7757	351.32	96.7671	101.602	81.8587	1.46851	8.0101	3.92613	63.0484	4395.08	107.938	1619.23	151.553	57.843	15.8815	3137.5	492.744	160.54	103.056	363.713	337.394
	Squash and melons	Hectares			108.925	15.7044	8.38416	18.5757	9.01891	35.2956	25.9574	250.911	210.789	52.7087	233.415	57.0093	269.102	547.107	1000.57	1384.21	63.9446	3.65084	14.7487	120.601	553.77	368.269	1.43537	2013.49	134.732	54.4401	25.8973	256.259	13.0902	7173.29	4012.21	4207.96	4927.13
	Cabbage	Hectares			209.327	43.2546	17.6836	32.6991	90.7767	82.8437	1284.1	2362.97	434.113	94.362	23.3802	1710	9304.09	154.875	399.622	192.756	80.6063	11.5438	10.4949	193.977	16.7344	105.082	4.11769	351.944	17.9506	71.7499	19.1601	10.153	4.59906	926.174	1448.94	130.282	284.593
	Leaves vegetables	Hectares			762.129	74.2736	54.8742	3501.62	242.518	139.194	1240.61	7799.64	461.73	157.054	44.2516	171.569	2634.51	282.293	1830.77	928.94	330.436	10.8625	33.698	749.62	239.1	291.083	12.761	980.314	288.221	83.929	93.9681	72.1303	19.6738	6677.75	7916.55	1791.69	22534.3
	Fruits	Hectares			130.056	286.823	63.2917	412.839	979.779	185.541	271.673	186.048	125.107	25.2062	236.053	213.256	512.88	326.983	3450.29	1446.47	666.03	5.58849	82.9357	276.571	3033.12	2291.23	19.6688	6690.21	432.836	153.54	157.337	1296.19	866.633	12494.7	10453.9	6396.62	21167.4
	Olives	Hectares			0	0	0	0	0	0	0	0	0	0	0	0	0	0.0971608	0	0	0	0	0	0	207.98	143.301	0	72.698	0	0	0	0	0	2072.3	3504.61	1450.46	844.468
	Citrus	Hectares			0	0	0	0	0	0	0	0	0	0	0	0	0	0	0	0	0	0	0	0	0	0	0	0	0	0	0	0	0	0	20.5317	0	0
	Hemp	Hectares			66.3132	33.8008	2.11294	0	16.6777	0.26216	0	0	917.738	81.9382	173.091	1.23134	18.9183	33.8633	326.126	31.7272	5.00851	31.8505	0	0	0	2.6034	1.02515	212.766	0	28.1634	0	13.3896	0.508838	0	0	5.37499	0
	Flax	Hectares			323.348	3265.45	57.3477	1706.73	1570.92	4585.29	0.53983	2448.37	83.0403	1.07761	3.55168	0	0.859987	0	0	6.69001	0	0	0	0	0	0	0.738846	8.40322	0	0	0	0.32014	0	0	0	0	0
	Forage maize	Hectares			2331.51	12365.7	2819.86	52281.7	124713	46378.7	132828	87631	28783.9	32918.3	107348	16448.2	334703	93864.5	274063	44150.5	109180	7854.25	1312.23	19201.8	2432.89	15824.3	19743.7	50710.8	7927.08	44430.8	8627.77	30042.5	15023.6	2892.76	4621.14	1118.94	3051.34
	Forage cabbages & roots	Hectares			99.6597	77.8075	67.1192	203.521	177.926	69.8585	105.839	145.682	283.105	195.694	290.836	59.7353	278.054	230.259	410.618	533.721	695.18	66.3705	17.266	60.4489	145.548	135.442	164.081	479.441	92.5373	138.438	40.636	150.771	166.035	157.39	224.509	239.711	509.497
	Alfalfa and clover	Hectares			4306.64	8298.74	1417.89	12555.3	4754.97	1065.13	3702.46	3404.71	177528	27064.5	19600.8	3168.2	9478.39	30529.9	36133	40022.6	50181.1	3289.48	1172.88	6477.26	50462.1	39647.8	31943.7	100496	3189.7	5250.73	341.521	31635.7	3535.94	27454.1	37752.3	23947.2	12700.2
	Non-legume temporary meadow	Hectares			2859.66	6709.69	2944.77	10493.4	54134.7	18043.4	85953.2	13152.7	15209.9	25444.2	53733	9378.64	397336	182416	434261	206775	477818	37880.2	5855.28	32206.7	24379.1	25958.1	200241	183972	9082.61	95648.6	11477.2	106051	112930	7316.35	6345.37	12359.5	3278.27
	Natural meadow	Hectares			0	6.75595e-06	0	0	184019	64783	121181	0	0	0	394553	0	156188	173971	351312	0	1.48589e+06	329232	225911	181873	259385	263988	410276	364214	0	297637	0	223174	415584	0	0	0	0
	Ratio of weeds biomass production per unit of crop production
	Weed prod per unit of Wheat		Interpolation from a compilation of studies on weed production in organic farming systems		0.01	0.01	0.01	0.01	0.01	0.01	0.01	0.01	0.01	0.01	0.01	0.01	0.01	0.01	0.01	0.01	0.01	0.01	0.01	0.01	0.01	0.01	0.01	0.01	0.01	0.01	0.01	0.01	0.01	0.01	0.01	0.01	0.01	0.01
	Weed prod per unit of Rye		Interpolation from a compilation of studies on weed production in organic farming systems (see Le Noe et al., 2019 for further detail)		0.01	0.01	0.01	0.01	0.01	0.01	0.01	0.01	0.01	0.01	0.01	0.01	0.01	0.01	0.01	0.01	0.01	0.01	0.01	0.01	0.01	0.01	0.01	0.01	0.01	0.01	0.01	0.01	0.01	0.01	0.01	0.01	0.01	0.01
	Weed prod per unit of Barley		Interpolation from a compilation of studies on weed production in organic farming systems (see Le Noe et al., 2019 for further detail)		0.01	0.01	0.01	0.01	0.01	0.01	0.01	0.01	0.01	0.01	0.01	0.01	0.01	0.01	0.01	0.01	0.01	0.01	0.01	0.01	0.01	0.01	0.01	0.01	0.01	0.01	0.01	0.01	0.01	0.01	0.01	0.01	0.01	0.01
	Weed prod per unit of Oat		Interpolation from a compilation of studies on weed production in organic farming systems (see Le Noe et al., 2019 for further detail)		0.01	0.01	0.01	0.01	0.01	0.01	0.01	0.01	0.01	0.01	0.01	0.01	0.01	0.01	0.01	0.01	0.01	0.01	0.01	0.01	0.01	0.01	0.01	0.01	0.01	0.01	0.01	0.01	0.01	0.01	0.01	0.01	0.01	0.01
	Weed prod per unit of Grain maize		Interpolation from a compilation of studies on weed production in organic farming systems (see Le Noe et al., 2019 for further detail)		0.01	0.01	0.01	0.01	0.01	0.01	0.01	0.01	0.01	0.01	0.01	0.01	0.01	0.01	0.01	0.01	0.01	0.01	0.01	0.01	0.01	0.01	0.01	0.01	0.01	0.01	0.01	0.01	0.01	0.01	0.01	0.01	0.01	0.01
	Weed prod per unit of Rice		Interpolation from a compilation of studies on weed production in organic farming systems (see Le Noe et al., 2019 for further detail)		0.01	0.01	0.01	0.01	0.01	0.01	0.01	0.01	0.01	0.01	0.01	0.01	0.01	0.01	0.01	0.01	0.01	0.01	0.01	0.01	0.01	0.01	0.01	0.01	0.01	0.01	0.01	0.01	0.01	0.01	0.01	0.01	0.01	0.01
	Weed prod per unit of Other cereals		Interpolation from a compilation of studies on weed production in organic farming systems (see Le Noe et al., 2019 for further detail)		0.01	0.01	0.01	0.01	0.01	0.01	0.01	0.01	0.01	0.01	0.01	0.01	0.01	0.01	0.01	0.01	0.01	0.01	0.01	0.01	0.01	0.01	0.01	0.01	0.01	0.01	0.01	0.01	0.01	0.01	0.01	0.01	0.01	0.01
	Weed prod per unit of Straw		Interpolation from a compilation of studies on weed production in organic farming systems (see Le Noe et al., 2019 for further detail)		0	0	0	0	0	0	0	0	0	0	0	0	0	0	0	0	0	0	0	0	0	0	0	0	0	0	0	0	0	0	0	0	0	0
	Weed prod per unit of Rapeseed		Interpolation from a compilation of studies on weed production in organic farming systems (see Le Noe et al., 2019 for further detail)		0.01	0.01	0.01	0.01	0.01	0.01	0.01	0.01	0.01	0.01	0.01	0.01	0.01	0.01	0.01	0.01	0.01	0.01	0.01	0.01	0.01	0.01	0.01	0.01	0.01	0.01	0.01	0.01	0.01	0.01	0.01	0.01	0.01	0.01
	Weed prod per unit of Sunflower		Interpolation from a compilation of studies on weed production in organic farming systems (see Le Noe et al., 2019 for further detail)		0.01	0.01	0.01	0.01	0.01	0.01	0.01	0.01	0.01	0.01	0.01	0.01	0.01	0.01	0.01	0.01	0.01	0.01	0.01	0.01	0.01	0.01	0.01	0.01	0.01	0.01	0.01	0.01	0.01	0.01	0.01	0.01	0.01	0.01
	Weed prod per unit of Soybean		Interpolation from a compilation of studies on weed production in organic farming systems (see Le Noe et al., 2019 for further detail)		0.01	0.01	0.01	0.01	0.01	0.01	0.01	0.01	0.01	0.01	0.01	0.01	0.01	0.01	0.01	0.01	0.01	0.01	0.01	0.01	0.01	0.01	0.01	0.01	0.01	0.01	0.01	0.01	0.01	0.01	0.01	0.01	0.01	0.01
	Weed prod per unit of Other oil crops		Interpolation from a compilation of studies on weed production in organic farming systems (see Le Noe et al., 2019 for further detail)		0.01	0.01	0.01	0.01	0.01	0.01	0.01	0.01	0.01	0.01	0.01	0.01	0.01	0.01	0.01	0.01	0.01	0.01	0.01	0.01	0.01	0.01	0.01	0.01	0.01	0.01	0.01	0.01	0.01	0.01	0.01	0.01	0.01	0.01
	Weed prod per unit of Horse beans and faba beans		Interpolation from a compilation of studies on weed production in organic farming systems (see Le Noe et al., 2019 for further detail)		0.01	0.01	0.01	0.01	0.01	0.01	0.01	0.01	0.01	0.01	0.01	0.01	0.01	0.01	0.01	0.01	0.01	0.01	0.01	0.01	0.01	0.01	0.01	0.01	0.01	0.01	0.01	0.01	0.01	0.01	0.01	0.01	0.01	0.01
	Weed prod per unit of Peas		Interpolation from a compilation of studies on weed production in organic farming systems (see Le Noe et al., 2019 for further detail)		0.01	0.01	0.01	0.01	0.01	0.01	0.01	0.01	0.01	0.01	0.01	0.01	0.01	0.01	0.01	0.01	0.01	0.01	0.01	0.01	0.01	0.01	0.01	0.01	0.01	0.01	0.01	0.01	0.01	0.01	0.01	0.01	0.01	0.01
	Weed prod per unit of Other protein crops		Interpolation from a compilation of studies on weed production in organic farming systems (see Le Noe et al., 2019 for further detail)		0.01	0.01	0.01	0.01	0.01	0.01	0.01	0.01	0.01	0.01	0.01	0.01	0.01	0.01	0.01	0.01	0.01	0.01	0.01	0.01	0.01	0.01	0.01	0.01	0.01	0.01	0.01	0.01	0.01	0.01	0.01	0.01	0.01	0.01
	Weed prod per unit of Sugar beet		Interpolation from a compilation of studies on weed production in organic farming systems (see Le Noe et al., 2019 for further detail)		0.01	0.01	0.01	0.01	0.01	0.01	0.01	0.01	0.01	0.01	0.01	0.01	0.01	0.01	0.01	0.01	0.01	0.01	0.01	0.01	0.01	0.01	0.01	0.01	0.01	0.01	0.01	0.01	0.01	0.01	0.01	0.01	0.01	0.01
	Weed prod per unit of Potatoes		Interpolation from a compilation of studies on weed production in organic farming systems (see Le Noe et al., 2019 for further detail)		0.01	0.01	0.01	0.01	0.01	0.01	0.01	0.01	0.01	0.01	0.01	0.01	0.01	0.01	0.01	0.01	0.01	0.01	0.01	0.01	0.01	0.01	0.01	0.01	0.01	0.01	0.01	0.01	0.01	0.01	0.01	0.01	0.01	0.01
	Weed prod per unit of Other roots		Interpolation from a compilation of studies on weed production in organic farming systems (see Le Noe et al., 2019 for further detail)		0.01	0.01	0.01	0.01	0.01	0.01	0.01	0.01	0.01	0.01	0.01	0.01	0.01	0.01	0.01	0.01	0.01	0.01	0.01	0.01	0.01	0.01	0.01	0.01	0.01	0.01	0.01	0.01	0.01	0.01	0.01	0.01	0.01	0.01
	Weed prod per unit of Green peas		Interpolation from a compilation of studies on weed production in organic farming systems (see Le Noe et al., 2019 for further detail)		0.01	0.01	0.01	0.01	0.01	0.01	0.01	0.01	0.01	0.01	0.01	0.01	0.01	0.01	0.01	0.01	0.01	0.01	0.01	0.01	0.01	0.01	0.01	0.01	0.01	0.01	0.01	0.01	0.01	0.01	0.01	0.01	0.01	0.01
	Weed prod per unit of Dry beans		Interpolation from a compilation of studies on weed production in organic farming systems (see Le Noe et al., 2019 for further detail)		0.01	0.01	0.01	0.01	0.01	0.01	0.01	0.01	0.01	0.01	0.01	0.01	0.01	0.01	0.01	0.01	0.01	0.01	0.01	0.01	0.01	0.01	0.01	0.01	0.01	0.01	0.01	0.01	0.01	0.01	0.01	0.01	0.01	0.01
	Weed prod per unit of Green beans		Interpolation from a compilation of studies on weed production in organic farming systems (see Le Noe et al., 2019 for further detail)		0.01	0.01	0.01	0.01	0.01	0.01	0.01	0.01	0.01	0.01	0.01	0.01	0.01	0.01	0.01	0.01	0.01	0.01	0.01	0.01	0.01	0.01	0.01	0.01	0.01	0.01	0.01	0.01	0.01	0.01	0.01	0.01	0.01	0.01
	Weed prod per unit of Dry vegetables		Interpolation from a compilation of studies on weed production in organic farming systems (see Le Noe et al., 2019 for further detail)		0.01	0.01	0.01	0.01	0.01	0.01	0.01	0.01	0.01	0.01	0.01	0.01	0.01	0.01	0.01	0.01	0.01	0.01	0.01	0.01	0.01	0.01	0.01	0.01	0.01	0.01	0.01	0.01	0.01	0.01	0.01	0.01	0.01	0.01
	Weed prod per unit of Dry fruits		Interpolation from a compilation of studies on weed production in organic farming systems (see Le Noe et al., 2019 for further detail)		0.01	0.01	0.01	0.01	0.01	0.01	0.01	0.01	0.01	0.01	0.01	0.01	0.01	0.01	0.01	0.01	0.01	0.01	0.01	0.01	0.01	0.01	0.01	0.01	0.01	0.01	0.01	0.01	0.01	0.01	0.01	0.01	0.01	0.01
	Weed prod per unit of Squash and melons		Interpolation from a compilation of studies on weed production in organic farming systems (see Le Noe et al., 2019 for further detail)		0.01	0.01	0.01	0.01	0.01	0.01	0.01	0.01	0.01	0.01	0.01	0.01	0.01	0.01	0.01	0.01	0.01	0.01	0.01	0.01	0.01	0.01	0.01	0.01	0.01	0.01	0.01	0.01	0.01	0.01	0.01	0.01	0.01	0.01
	Weed prod per unit of Cabbage		Interpolation from a compilation of studies on weed production in organic farming systems (see Le Noe et al., 2019 for further detail)		0.01	0.01	0.01	0.01	0.01	0.01	0.01	0.01	0.01	0.01	0.01	0.01	0.01	0.01	0.01	0.01	0.01	0.01	0.01	0.01	0.01	0.01	0.01	0.01	0.01	0.01	0.01	0.01	0.01	0.01	0.01	0.01	0.01	0.01
	Weed prod per unit of Leaves vegetables		Interpolation from a compilation of studies on weed production in organic farming systems (see Le Noe et al., 2019 for further detail)		0.01	0.01	0.01	0.01	0.01	0.01	0.01	0.01	0.01	0.01	0.01	0.01	0.01	0.01	0.01	0.01	0.01	0.01	0.01	0.01	0.01	0.01	0.01	0.01	0.01	0.01	0.01	0.01	0.01	0.01	0.01	0.01	0.01	0.01
	Weed prod per unit of Fruits		Interpolation from a compilation of studies on weed production in organic farming systems (see Le Noe et al., 2019 for further detail)		0.01	0.01	0.01	0.01	0.01	0.01	0.01	0.01	0.01	0.01	0.01	0.01	0.01	0.01	0.01	0.01	0.01	0.01	0.01	0.01	0.01	0.01	0.01	0.01	0.01	0.01	0.01	0.01	0.01	0.01	0.01	0.01	0.01	0.01
	Weed prod per unit of Olives		Interpolation from a compilation of studies on weed production in organic farming systems (see Le Noe et al., 2019 for further detail)		0	0	0	0	0	0	0	0	0	0	0	0	0	0	0	0	0	0	0	0	0	0	0	0	0	0	0	0	0	0	0	0	0	0
	Weed prod per unit of Citrus		Interpolation from a compilation of studies on weed production in organic farming systems (see Le Noe et al., 2019 for further detail)		0	0	0	0	0	0	0	0	0	0	0	0	0	0	0	0	0	0	0	0	0	0	0	0	0	0	0	0	0	0	0	0	0	0
	Weed prod per unit of Hemp		Interpolation from a compilation of studies on weed production in organic farming systems (see Le Noe et al., 2019 for further detail)		0.01	0.01	0.01	0.01	0.01	0.01	0.01	0.01	0.01	0.01	0.01	0.01	0.01	0.01	0.01	0.01	0.01	0.01	0.01	0.01	0.01	0.01	0.01	0.01	0.01	0.01	0.01	0.01	0.01	0.01	0.01	0.01	0.01	0.01
	Weed prod per unit of Flax		Interpolation from a compilation of studies on weed production in organic farming systems (see Le Noe et al., 2019 for further detail)		0.01	0.01	0.01	0.01	0.01	0.01	0.01	0.01	0.01	0.01	0.01	0.01	0.01	0.01	0.01	0.01	0.01	0.01	0.01	0.01	0.01	0.01	0.01	0.01	0.01	0.01	0.01	0.01	0.01	0.01	0.01	0.01	0.01	0.01
	Weed prod per unit of Forage maize		Interpolation from a compilation of studies on weed production in organic farming systems (see Le Noe et al., 2019 for further detail)		0.01	0.01	0.01	0.01	0.01	0.01	0.01	0.01	0.01	0.01	0.01	0.01	0.01	0.01	0.01	0.01	0.01	0.01	0.01	0.01	0.01	0.01	0.01	0.01	0.01	0.01	0.01	0.01	0.01	0.01	0.01	0.01	0.01	0.01
	Weed prod per unit of Forage cabbages		Interpolation from a compilation of studies on weed production in organic farming systems (see Le Noe et al., 2019 for further detail)		0.01	0.01	0.01	0.01	0.01	0.01	0.01	0.01	0.01	0.01	0.01	0.01	0.01	0.01	0.01	0.01	0.01	0.01	0.01	0.01	0.01	0.01	0.01	0.01	0.01	0.01	0.01	0.01	0.01	0.01	0.01	0.01	0.01	0.01
	Weed prod per unit of Alfalfa and clover		Interpolation from a compilation of studies on weed production in organic farming systems (see Le Noe et al., 2019 for further detail)		0	0	0	0	0	0	0	0	0	0	0	0	0	0	0	0	0	0	0	0	0	0	0	0	0	0	0	0	0	0	0	0	0	0
	Weed prod per unit of Non-legume temporary meadow		Interpolation from a compilation of studies on weed production in organic farming systems (see Le Noe et al., 2019 for further detail)		0.01	0.01	0.01	0.01	0.01	0.01	0.01	0.01	0.01	0.01	0.01	0.01	0.01	0.01	0.01	0.01	0.01	0.01	0.01	0.01	0.01	0.01	0.01	0.01	0.01	0.01	0.01	0.01	0.01	0.01	0.01	0.01	0.01	0.01
	Weed prod per unit of Natural meadow		Interpolation from a compilation of studies on weed production in organic farming systems (see Le Noe et al., 2019 for further detail)																																			#DIV/0!
																																						#DIV/0!
	N content in vegetal production																																					#DIV/0!
	Wheat	kgN/100kgDFW	Lassaletta et al. 2014, Suppl Mat, compiling FAO data		1.95	1.95	1.95	1.95	1.95	1.95	1.95	1.95	1.95	1.95	1.95	1.95	1.95	1.95	1.95	1.95	1.95	1.95	1.95	1.95	1.95	1.95	1.95	1.95	1.95	1.95	1.95	1.95	1.95	1.95	1.95	1.95	1.95	1.95
	Rye	kgN/100kgDFW	Lassaletta et al. 2014, Suppl Mat, compiling FAO data		1.76	1.76	1.76	1.76	1.76	1.76	1.76	1.76	1.76	1.76	1.76	1.76	1.76	1.76	1.76	1.76	1.76	1.76	1.76	1.76	1.76	1.76	1.76	1.76	1.76	1.76	1.76	1.76	1.76	1.76	1.76	1.76	1.76	1.76
	Barley	kgN/100kgDFW	Lassaletta et al. 2014, Suppl Mat, compiling FAO data		1.76	1.76	1.76	1.76	1.76	1.76	1.76	1.76	1.76	1.76	1.76	1.76	1.76	1.76	1.76	1.76	1.76	1.76	1.76	1.76	1.76	1.76	1.76	1.76	1.76	1.76	1.76	1.76	1.76	1.76	1.76	1.76	1.76	1.76
	Oat	kgN/100kgDFW	Lassaletta et al. 2014, Suppl Mat, compiling FAO data		2.08	2.08	2.08	2.08	2.08	2.08	2.08	2.08	2.08	2.08	2.08	2.08	2.08	2.08	2.08	2.08	2.08	2.08	2.08	2.08	2.08	2.08	2.08	2.08	2.08	2.08	2.08	2.08	2.08	2.08	2.08	2.08	2.08	2.08
	Grain maize	kgN/100kgDFW	Lassaletta et al. 2014, Suppl Mat, compiling FAO data		1.52	1.52	1.52	1.52	1.52	1.52	1.52	1.52	1.52	1.52	1.52	1.52	1.52	1.52	1.52	1.52	1.52	1.52	1.52	1.52	1.52	1.52	1.52	1.52	1.52	1.52	1.52	1.52	1.52	1.52	1.52	1.52	1.52	1.52
	Rice	kgN/100kgDFW	Lassaletta et al. 2014, Suppl Mat, compiling FAO data		1.07	1.07	1.07	1.07	1.07	1.07	1.07	1.07	1.07	1.07	1.07	1.07	1.07	1.07	1.07	1.07	1.07	1.07	1.07	1.07	1.07	1.07	1.07	1.07	1.07	1.07	1.07	1.07	1.07	1.07	1.07	1.07	1.07	1.07
	Other cereals	kgN/100kgDFW	Lassaletta et al. 2014, Suppl Mat, compiling FAO data		1.8	1.8	1.8	1.8	1.8	1.8	1.8	1.8	1.8	1.8	1.8	1.8	1.8	1.8	1.8	1.8	1.8	1.8	1.8	1.8	1.8	1.8	1.8	1.8	1.8	1.8	1.8	1.8	1.8	1.8	1.8	1.8	1.8	1.8
	Straw	kgN/100kgDFW	Lassaletta et al. 2014, Suppl Mat, compiling FAO data		0.5	0.5	0.5	0.5	0.5	0.5	0.5	0.5	0.5	0.5	0.5	0.5	0.5	0.5	0.5	0.5	0.5	0.5	0.5	0.5	0.5	0.5	0.5	0.5	0.5	0.5	0.5	0.5	0.5	0.5	0.5	0.5	0.5	0.5
	Rapeseed	kgN/100kgDFW	Lassaletta et al. 2014, Suppl Mat, compiling FAO data		3.5	3.5	3.5	3.5	3.5	3.5	3.5	3.5	3.5	3.5	3.5	3.5	3.5	3.5	3.5	3.5	3.5	3.5	3.5	3.5	3.5	3.5	3.5	3.5	3.5	3.5	3.5	3.5	3.5	3.5	3.5	3.5	3.5	3.5
	Sunflower	kgN/100kgDFW	Lassaletta et al. 2014, Suppl Mat, compiling FAO data		1.96	1.96	1.96	1.96	1.96	1.96	1.96	1.96	1.96	1.96	1.96	1.96	1.96	1.96	1.96	1.96	1.96	1.96	1.96	1.96	1.96	1.96	1.96	1.96	1.96	1.96	1.96	1.96	1.96	1.96	1.96	1.96	1.96	1.96
	Soybean	kgN/100kgDFW	Lassaletta et al. 2014, Suppl Mat, compiling FAO data		6	6	6	6	6	6	6	6	6	6	6	6	6	6	6	6	6	6	6	6	6	6	6	6	6	6	6	6	6	6	6	6	6	6
	Other oil crops	kgN/100kgDFW	Lassaletta et al. 2014, Suppl Mat, compiling FAO data		3.5	3.5	3.5	3.5	3.5	3.5	3.5	3.5	3.5	3.5	3.5	3.5	3.5	3.5	3.5	3.5	3.5	3.5	3.5	3.5	3.5	3.5	3.5	3.5	3.5	3.5	3.5	3.5	3.5	3.5	3.5	3.5	3.5	3.5
	Horse beans and faba beans	kgN/100kgDFW	Lassaletta et al. 2014, Suppl Mat, compiling FAO data		3.5	3.5	3.5	3.5	3.5	3.5	3.5	3.5	3.5	3.5	3.5	3.5	3.5	3.5	3.5	3.5	3.5	3.5	3.5	3.5	3.5	3.5	3.5	3.5	3.5	3.5	3.5	3.5	3.5	3.5	3.5	3.5	3.5	3.5
	Peas	kgN/100kgDFW	Lassaletta et al. 2014, Suppl Mat, compiling FAO data		3.6	3.6	3.6	3.6	3.6	3.6	3.6	3.6	3.6	3.6	3.6	3.6	3.6	3.6	3.6	3.6	3.6	3.6	3.6	3.6	3.6	3.6	3.6	3.6	3.6	3.6	3.6	3.6	3.6	3.6	3.6	3.6	3.6	3.6
	Other protein crops	kgN/100kgDFW	Lassaletta et al. 2014, Suppl Mat, compiling FAO data		3.6	3.6	3.6	3.6	3.6	3.6	3.6	3.6	3.6	3.6	3.6	3.6	3.6	3.6	3.6	3.6	3.6	3.6	3.6	3.6	3.6	3.6	3.6	3.6	3.6	3.6	3.6	3.6	3.6	3.6	3.6	3.6	3.6	3.6
	Sugar beet	kgN/100kgDFW	Lassaletta et al. 2014, Suppl Mat, compiling FAO data		0.208	0.208	0.208	0.208	0.208	0.208	0.208	0.208	0.208	0.208	0.208	0.208	0.208	0.208	0.208	0.208	0.208	0.208	0.208	0.208	0.208	0.208	0.208	0.208	0.208	0.208	0.208	0.208	0.208	0.208	0.208	0.208	0.208	0.208
	Potatoes	kgN/100kgDFW	Lassaletta et al. 2014, Suppl Mat, compiling FAO data		0.256	0.256	0.256	0.256	0.256	0.256	0.256	0.256	0.256	0.256	0.256	0.256	0.256	0.256	0.256	0.256	0.256	0.256	0.256	0.256	0.256	0.256	0.256	0.256	0.256	0.256	0.256	0.256	0.256	0.256	0.256	0.256	0.256	0.256
	Other roots	kgN/100kgDFW	Lassaletta et al. 2014, Suppl Mat, compiling FAO data		0.23	0.23	0.23	0.23	0.23	0.23	0.23	0.23	0.23	0.23	0.23	0.23	0.23	0.23	0.23	0.23	0.23	0.23	0.23	0.23	0.23	0.23	0.23	0.23	0.23	0.23	0.23	0.23	0.23	0.23	0.23	0.23	0.23	0.23
	Green peas	kgN/100kgDFW	Lassaletta et al. 2014, Suppl Mat, compiling FAO data		0.5	0.5	0.5	0.5	0.5	0.5	0.5	0.5	0.5	0.5	0.5	0.5	0.5	0.5	0.5	0.5	0.5	0.5	0.5	0.5	0.5	0.5	0.5	0.5	0.5	0.5	0.5	0.5	0.5	0.5	0.5	0.5	0.5	0.5
	Dry beans	kgN/100kgDFW	Lassaletta et al. 2014, Suppl Mat, compiling FAO data		1.5	1.5	1.5	1.5	1.5	1.5	1.5	1.5	1.5	1.5	1.5	1.5	1.5	1.5	1.5	1.5	1.5	1.5	1.5	1.5	1.5	1.5	1.5	1.5	1.5	1.5	1.5	1.5	1.5	1.5	1.5	1.5	1.5	1.5
	Green beans	kgN/100kgDFW	Lassaletta et al. 2014, Suppl Mat, compiling FAO data		0.5	0.5	0.5	0.5	0.5	0.5	0.5	0.5	0.5	0.5	0.5	0.5	0.5	0.5	0.5	0.5	0.5	0.5	0.5	0.5	0.5	0.5	0.5	0.5	0.5	0.5	0.5	0.5	0.5	0.5	0.5	0.5	0.5	0.5
	Dry vegetables	kgN/100kgDFW	Lassaletta et al. 2014, Suppl Mat, compiling FAO data		3.6	3.6	3.6	3.6	3.6	3.6	3.6	3.6	3.6	3.6	3.6	3.6	3.6	3.6	3.6	3.6	3.6	3.6	3.6	3.6	3.6	3.6	3.6	3.6	3.6	3.6	3.6	3.6	3.6	3.6	3.6	3.6	3.6	3.6
	Dry fruits	kgN/100kgDFW	Lassaletta et al. 2014, Suppl Mat, compiling FAO data		2	2	2	2	2	2	2	2	2	2	2	2	2	2	2	2	2	2	2	2	2	2	2	2	2	2	2	2	2	2	2	2	2	2
	Squash and melons	kgN/100kgDFW	Lassaletta et al. 2014, Suppl Mat, compiling FAO data		0.18	0.18	0.18	0.18	0.18	0.18	0.18	0.18	0.18	0.18	0.18	0.18	0.18	0.18	0.18	0.18	0.18	0.18	0.18	0.18	0.18	0.18	0.18	0.18	0.18	0.18	0.18	0.18	0.18	0.18	0.18	0.18	0.18	0.18
	Cabbage	kgN/100kgDFW	Lassaletta et al. 2014, Suppl Mat, compiling FAO data		0.36	0.36	0.36	0.36	0.36	0.36	0.36	0.36	0.36	0.36	0.36	0.36	0.36	0.36	0.36	0.36	0.36	0.36	0.36	0.36	0.36	0.36	0.36	0.36	0.36	0.36	0.36	0.36	0.36	0.36	0.36	0.36	0.36	0.36
	Leaves vegetables	kgN/100kgDFW	Lassaletta et al. 2014, Suppl Mat, compiling FAO data		0.22	0.22	0.22	0.22	0.22	0.22	0.22	0.22	0.22	0.22	0.22	0.22	0.22	0.22	0.22	0.22	0.22	0.22	0.22	0.22	0.22	0.22	0.22	0.22	0.22	0.22	0.22	0.22	0.22	0.22	0.22	0.22	0.22	0.22
	Fruits	kgN/100kgDFW	Lassaletta et al. 2014, Suppl Mat, compiling FAO data		0.1	0.1	0.1	0.1	0.1	0.1	0.1	0.1	0.1	0.1	0.1	0.1	0.1	0.1	0.1	0.1	0.1	0.1	0.1	0.1	0.1	0.1	0.1	0.1	0.1	0.1	0.1	0.1	0.1	0.1	0.1	0.1	0.1	0.1
	Olives	kgN/100kgDFW	Lassaletta et al. 2014, Suppl Mat, compiling FAO data		0.67	0.67	0.67	0.67	0.67	0.67	0.67	0.67	0.67	0.67	0.67	0.67	0.67	0.67	0.67	0.67	0.67	0.67	0.67	0.67	0.67	0.67	0.67	0.67	0.67	0.67	0.67	0.67	0.67	0.67	0.67	0.67	0.67	0.67
	Citrus	kgN/100kgDFW	Lassaletta et al. 2014, Suppl Mat, compiling FAO data		0.18	0.18	0.18	0.18	0.18	0.18	0.18	0.18	0.18	0.18	0.18	0.18	0.18	0.18	0.18	0.18	0.18	0.18	0.18	0.18	0.18	0.18	0.18	0.18	0.18	0.18	0.18	0.18	0.18	0.18	0.18	0.18	0.18	0.18
	Hemp	kgN/100kgDFW	Lassaletta et al. 2014, Suppl Mat, compiling FAO data		0.35	0.35	0.35	0.35	0.35	0.35	0.35	0.35	0.35	0.35	0.35	0.35	0.35	0.35	0.35	0.35	0.35	0.35	0.35	0.35	0.35	0.35	0.35	0.35	0.35	0.35	0.35	0.35	0.35	0.35	0.35	0.35	0.35	0.35
	Flax	kgN/100kgDFW	Lassaletta et al. 2014, Suppl Mat, compiling FAO data		0.35	0.35	0.35	0.35	0.35	0.35	0.35	0.35	0.35	0.35	0.35	0.35	0.35	0.35	0.35	0.35	0.35	0.35	0.35	0.35	0.35	0.35	0.35	0.35	0.35	0.35	0.35	0.35	0.35	0.35	0.35	0.35	0.35	0.35
	Forage maize	kgN/100kgDFW	Lassaletta et al. 2014, Suppl Mat, compiling FAO data		1	1	1	1	1	1	1	1	1	1	1	1	1	1	1	1	1	1	1	1	1	1	1	1	1	1	1	1	1	1	1	1	1	1
	Forage cabbages	kgN/100kgDFW	Lassaletta et al. 2014, Suppl Mat, compiling FAO data		0.36	0.36	0.36	0.36	0.36	0.36	0.36	0.36	0.36	0.36	0.36	0.36	0.36	0.36	0.36	0.36	0.36	0.36	0.36	0.36	0.36	0.36	0.36	0.36	0.36	0.36	0.36	0.36	0.36	0.36	0.36	0.36	0.36	0.36
	Alfalfa and clover	kgN/100kgDFW	Lassaletta et al. 2014, Suppl Mat, compiling FAO data		2.8	2.8	2.8	2.8	2.8	2.8	2.8	2.8	2.8	2.8	2.8	2.8	2.8	2.8	2.8	2.8	2.8	2.8	2.8	2.8	2.8	2.8	2.8	2.8	2.8	2.8	2.8	2.8	2.8	2.8	2.8	2.8	2.8	2.8
	Non-legume temporary meadow	kgN/100kgDFW	Lassaletta et al. 2014, Suppl Mat, compiling FAO data		1.25	1.25	1.25	1.25	1.25	1.25	1.25	1.25	1.25	1.25	1.25	1.25	1.25	1.25	1.25	1.25	1.25	1.25	1.25	1.25	1.25	1.25	1.25	1.25	1.25	1.25	1.25	1.25	1.25	1.25	1.25	1.25	1.25	1.25
	Natural meadow	kgN/100kgDFW	Lassaletta et al. 2014, Suppl Mat, compiling FAO data		2.05	2.05	2.05	2.05	2.05	2.05	2.05	2.05	2.05	2.05	2.05	2.05	2.05	2.05	2.05	2.05	2.05	2.05	2.05	2.05	2.05	2.05	2.05	2.05	2.05	2.05	2.05	2.05	2.05	2.05	2.05	2.05	2.05	2.05
	N production
	total crop production N	ktonN/yr			100.311	70.0456	51.4457	238.836	100.866	34.1224	50.2607	143.303	189.515	87.7384	101.221	50.4662	164.779	117.596	231.628	291.632	181.329	17.3033	4.26659	24.495	21.275	32.9926	33.5802	250.142	10.664	64.674	17.7847	38.8856	17.8494	9.408	29.8841	10.1143	4.85247	2793.27
	legume grain prod N	ktonN/yr																																				0
	legume fodder prod N	ktonN/yr																																				0
	perm grassland prod N	ktonN/yr			0	3.2367e-10	0	0	38.8842	19.3016	26.4499	0	0	0	82.9128	0	18.6265	31.987	50.8697	0	222.747	39.5875	20.3641	26.4053	20.3138	25.1434	35.8059	48.6912	0	28.0167	0	26.8387	51.56	0	0	0	0	814.505
	cereal prod N	ktonN/yr			68.2907	42.97	36.5682	150.009	51.7919	19.4816	12.7809	80.8494	112.543	52.7155	60.7602	41.0321	66.5264	65.1845	100.856	195.976	80.4659	8.32316	1.7797	14.9571	6.59902	19.891	6.31419	152.053	7.98089	36.6293	15.3397	16.0264	3.3289	5.36035	14.8349	6.63784	0.877645
	forage production (excl perm grasland)	ktonN/yr			13.5835	18.0835	10.6855	34.0397	41.9249	10.5245	36.2946	34.4516	33.034	30.3666	37.51	6.86866	93.3401	46.7826	122.407	80.4007	92.1493	8.40769	2.14894	8.43823	6.0936	7.62801	24.3449	76.2948	2.04338	26.7853	2.14479	18.5395	13.9902	1.01429	3.68183	1.2897	0.500095
	% humidity
	Wheat	%	Preston, 2012		15	15	15	15	15	15	15	15	15	15	15	15	15	15	15	15	15	15	15	15	15	15	15	15	15	15	15	15	15	15	15	15	15	15
	Rye	%	Preston, 2012		15	15	15	15	15	15	15	15	15	15	15	15	15	15	15	15	15	15	15	15	15	15	15	15	15	15	15	15	15	15	15	15	15	15
	Barley	%	Preston, 2012		15	15	15	15	15	15	15	15	15	15	15	15	15	15	15	15	15	15	15	15	15	15	15	15	15	15	15	15	15	15	15	15	15	15
	Oat	%	Preston, 2012		15	15	15	15	15	15	15	15	15	15	15	15	15	15	15	15	15	15	15	15	15	15	15	15	15	15	15	15	15	15	15	15	15	15
	Grain maize	%	Preston, 2012		15	15	15	15	15	15	15	15	15	15	15	15	15	15	15	15	15	15	15	15	15	15	15	15	15	15	15	15	15	15	15	15	15	15
	Rice	%	Preston, 2012		15	15	15	15	15	15	15	15	15	15	15	15	15	15	15	15	15	15	15	15	15	15	15	15	15	15	15	15	15	15	15	15	15	15
	Other cereals	%	Preston, 2012		15	15	15	15	15	15	15	15	15	15	15	15	15	15	15	15	15	15	15	15	15	15	15	15	15	15	15	15	15	15	15	15	15	15
	Straw	%	Preston, 2012		15	15	15	15	15	15	15	15	15	15	15	15	15	15	15	15	15	15	15	15	15	15	15	15	15	15	15	15	15	15	15	15	15	15
	Rapeseed	%	Preston, 2012		15	15	15	15	15	15	15	15	15	15	15	15	15	15	15	15	15	15	15	15	15	15	15	15	15	15	15	15	15	15	15	15	15	15
	Sunflower	%	Preston, 2012		15	15	15	15	15	15	15	15	15	15	15	15	15	15	15	15	15	15	15	15	15	15	15	15	15	15	15	15	15	15	15	15	15	15
	Soybean	%	Preston, 2012		15	15	15	15	15	15	15	15	15	15	15	15	15	15	15	15	15	15	15	15	15	15	15	15	15	15	15	15	15	15	15	15	15	15
	Other oil crops	%	Preston, 2012		15	15	15	15	15	15	15	15	15	15	15	15	15	15	15	15	15	15	15	15	15	15	15	15	15	15	15	15	15	15	15	15	15	15
	Horse beans and faba beans	%	Preston, 2012		15	15	15	15	15	15	15	15	15	15	15	15	15	15	15	15	15	15	15	15	15	15	15	15	15	15	15	15	15	15	15	15	15	15
	Peas	%	Preston, 2012		15	15	15	15	15	15	15	15	15	15	15	15	15	15	15	15	15	15	15	15	15	15	15	15	15	15	15	15	15	15	15	15	15	15
	Other protein crops	%	Preston, 2012		15	15	15	15	15	15	15	15	15	15	15	15	15	15	15	15	15	15	15	15	15	15	15	15	15	15	15	15	15	15	15	15	15	15
	Sugar beet	%	Preston, 2012		80	80	80	80	80	80	80	80	80	80	80	80	80	80	80	80	80	80	80	80	80	80	80	80	80	80	80	80	80	80	80	80	80	80
	Potatoes	%	Preston, 2012		80	80	80	80	80	80	80	80	80	80	80	80	80	80	80	80	80	80	80	80	80	80	80	80	80	80	80	80	80	80	80	80	80	80
	Other roots	%	Preston, 2012		80	80	80	80	80	80	80	80	80	80	80	80	80	80	80	80	80	80	80	80	80	80	80	80	80	80	80	80	80	80	80	80	80	80
	Green peas	%	Preston, 2012		90	90	90	90	90	90	90	90	90	90	90	90	90	90	90	90	90	90	90	90	90	90	90	90	90	90	90	90	90	90	90	90	90	90
	Dry beans	%	Preston, 2012		15	15	15	15	15	15	15	15	15	15	15	15	15	15	15	15	15	15	15	15	15	15	15	15	15	15	15	15	15	15	15	15	15	15
	Green beans	%	Preston, 2012		90	90	90	90	90	90	90	90	90	90	90	90	90	90	90	90	90	90	90	90	90	90	90	90	90	90	90	90	90	90	90	90	90	90
	Dry vegetables	%	Preston, 2012		15	15	15	15	15	15	15	15	15	15	15	15	15	15	15	15	15	15	15	15	15	15	15	15	15	15	15	15	15	15	15	15	15	15
	Dry fruits	%	Preston, 2012		15	15	15	15	15	15	15	15	15	15	15	15	15	15	15	15	15	15	15	15	15	15	15	15	15	15	15	15	15	15	15	15	15	15
	Squash and melons	%	Preston, 2012		85	85	85	85	85	85	85	85	85	85	85	85	85	85	85	85	85	85	85	85	85	85	85	85	85	85	85	85	85	85	85	85	85	85
	Cabbage	%	Preston, 2012		90	90	90	90	90	90	90	90	90	90	90	90	90	90	90	90	90	90	90	90	90	90	90	90	90	90	90	90	90	90	90	90	90	90
	Leaves vegetables	%	Preston, 2012		90	90	90	90	90	90	90	90	90	90	90	90	90	90	90	90	90	90	90	90	90	90	90	90	90	90	90	90	90	90	90	90	90	90
	Fruits	%	Preston, 2012		85	85	85	85	85	85	85	85	85	85	85	85	85	85	85	85	85	85	85	85	85	85	85	85	85	85	85	85	85	85	85	85	85	85
	Olives	%	Preston, 2012		85	85	85	85	85	85	85	85	85	85	85	85	85	85	85	85	85	85	85	85	85	85	85	85	85	85	85	85	85	85	85	85	85	85
	Citrus	%	Preston, 2012		85	85	85	85	85	85	85	85	85	85	85	85	85	85	85	85	85	85	85	85	85	85	85	85	85	85	85	85	85	85	85	85	85	85
	Hemp	%	Preston, 2012		25	25	25	25	25	25	25	25	25	25	25	25	25	25	25	25	25	25	25	25	25	25	25	25	25	25	25	25	25	25	25	25	25	25
	Flax	%	Preston, 2012		25	25	25	25	25	25	25	25	25	25	25	25	25	25	25	25	25	25	25	25	25	25	25	25	25	25	25	25	25	25	25	25	25	25
	Forage maize	%	Preston, 2012		70	70	70	70	70	70	70	70	70	70	70	70	70	70	70	70	70	70	70	70	70	70	70	70	70	70	70	70	70	70	70	70	70	70
	Forage cabbages	%	Preston, 2012		70	70	70	70	70	70	70	70	70	70	70	70	70	70	70	70	70	70	70	70	70	70	70	70	70	70	70	70	70	70	70	70	70	70
	Alfalfa and clover	%	Preston, 2012		5	5	5	5	5	5	5	5	5	5	5	5	5	5	5	5	5	5	5	5	5	5	5	5	5	5	5	5	5	5	5	5	5	5
	Non-legume temporary meadow	%	Preston, 2012		5	5	5	5	5	5	5	5	5	5	5	5	5	5	5	5	5	5	5	5	5	5	5	5	5	5	5	5	5	5	5	5	5	5
	Natural meadow	%	Preston, 2012		5	5	5	5	5	5	5	5	5	5	5	5	5	5	5	5	5	5	5	5	5	5	5	5	5	5	5	5	5	5	5	5	5	5
	Weed	%	Preston, 2012		0	0	0	0	0	0	0	0	0	0	0	0	0	0	0	0	0	0	0	0	0	0	0	0	0	0	0	0	0	0	0	0	0	0
	Allocation of C to crop production
	Wheat	Sd	Clivot et al. 2017 after Boliner et al. 2007		0.402	0.402	0.402	0.402	0.402	0.402	0.402	0.402	0.402	0.402	0.402	0.402	0.402	0.402	0.402	0.402	0.402	0.402	0.402	0.402	0.402	0.402	0.402	0.402	0.402	0.402	0.402	0.402	0.402	0.402	0.402	0.402	0.402	0.402
	Rye	Sd	Clivot et al. 2017 after Boliner et al. 2007		0.402	0.402	0.402	0.402	0.402	0.402	0.402	0.402	0.402	0.402	0.402	0.402	0.402	0.402	0.402	0.402	0.402	0.402	0.402	0.402	0.402	0.402	0.402	0.402	0.402	0.402	0.402	0.402	0.402	0.402	0.402	0.402	0.402	0.402
	Barley	Sd	Clivot et al. 2017 after Boliner et al. 2007		0.44	0.44	0.44	0.44	0.44	0.44	0.44	0.44	0.44	0.44	0.44	0.44	0.44	0.44	0.44	0.44	0.44	0.44	0.44	0.44	0.44	0.44	0.44	0.44	0.44	0.44	0.44	0.44	0.44	0.44	0.44	0.44	0.44	0.44
	Oat	Sd	Clivot et al. 2017 after Boliner et al. 2007		0.331	0.331	0.331	0.331	0.331	0.331	0.331	0.331	0.331	0.331	0.331	0.331	0.331	0.331	0.331	0.331	0.331	0.331	0.331	0.331	0.331	0.331	0.331	0.331	0.331	0.331	0.331	0.331	0.331	0.331	0.331	0.331	0.331	0.331
	Grain maize	Sd	Clivot et al. 2017 after Boliner et al. 2007		0.426	0.426	0.426	0.426	0.426	0.426	0.426	0.426	0.426	0.426	0.426	0.426	0.426	0.426	0.426	0.426	0.426	0.426	0.426	0.426	0.426	0.426	0.426	0.426	0.426	0.426	0.426	0.426	0.426	0.426	0.426	0.426	0.426	0.426
	Rice	Sd	Clivot et al. 2017 after Boliner et al. 2007		0.396	0.396	0.396	0.396	0.396	0.396	0.396	0.396	0.396	0.396	0.396	0.396	0.396	0.396	0.396	0.396	0.396	0.396	0.396	0.396	0.396	0.396	0.396	0.396	0.396	0.396	0.396	0.396	0.396	0.396	0.396	0.396	0.396	0.396
	Other cereals	Sd	Clivot et al. 2017 after Boliner et al. 2007		0.396	0.396	0.396	0.396	0.396	0.396	0.396	0.396	0.396	0.396	0.396	0.396	0.396	0.396	0.396	0.396	0.396	0.396	0.396	0.396	0.396	0.396	0.396	0.396	0.396	0.396	0.396	0.396	0.396	0.396	0.396	0.396	0.396	0.396
	Straw	Sd	Clivot et al. 2017 after Boliner et al. 2007
	Rapeseed	Sd	Clivot et al. 2017 after Boliner et al. 2007		0.163	0.163	0.163	0.163	0.163	0.163	0.163	0.163	0.163	0.163	0.163	0.163	0.163	0.163	0.163	0.163	0.163	0.163	0.163	0.163	0.163	0.163	0.163	0.163	0.163	0.163	0.163	0.163	0.163	0.163	0.163	0.163	0.163	0.163
	Sunflower	Sd	Clivot et al. 2017 after Boliner et al. 2007		0.26	0.26	0.26	0.26	0.26	0.26	0.26	0.26	0.26	0.26	0.26	0.26	0.26	0.26	0.26	0.26	0.26	0.26	0.26	0.26	0.26	0.26	0.26	0.26	0.26	0.26	0.26	0.26	0.26	0.26	0.26	0.26	0.26	0.26
	Soybean	Sd	Clivot et al. 2017 after Boliner et al. 2007		0.252	0.252	0.252	0.252	0.252	0.252	0.252	0.252	0.252	0.252	0.252	0.252	0.252	0.252	0.252	0.252	0.252	0.252	0.252	0.252	0.252	0.252	0.252	0.252	0.252	0.252	0.252	0.252	0.252	0.252	0.252	0.252	0.252	0.252
	Other oil crops	Sd	Clivot et al. 2017 after Boliner et al. 2007		0.225	0.225	0.225	0.225	0.225	0.225	0.225	0.225	0.225	0.225	0.225	0.225	0.225	0.225	0.225	0.225	0.225	0.225	0.225	0.225	0.225	0.225	0.225	0.225	0.225	0.225	0.225	0.225	0.225	0.225	0.225	0.225	0.225	0.225
	Horse beans and faba beans	Sd	Clivot et al. 2017 after Boliner et al. 2007		0.386	0.386	0.386	0.386	0.386	0.386	0.386	0.386	0.386	0.386	0.386	0.386	0.386	0.386	0.386	0.386	0.386	0.386	0.386	0.386	0.386	0.386	0.386	0.386	0.386	0.386	0.386	0.386	0.386	0.386	0.386	0.386	0.386	0.386
	Peas	Sd	Clivot et al. 2017 after Boliner et al. 2007		0.451	0.451	0.451	0.451	0.451	0.451	0.451	0.451	0.451	0.451	0.451	0.451	0.451	0.451	0.451	0.451	0.451	0.451	0.451	0.451	0.451	0.451	0.451	0.451	0.451	0.451	0.451	0.451	0.451	0.451	0.451	0.451	0.451	0.451
	Other protein crops	Sd	Clivot et al. 2017 after Boliner et al. 2007		0.419	0.419	0.419	0.419	0.419	0.419	0.419	0.419	0.419	0.419	0.419	0.419	0.419	0.419	0.419	0.419	0.419	0.419	0.419	0.419	0.419	0.419	0.419	0.419	0.419	0.419	0.419	0.419	0.419	0.419	0.419	0.419	0.419	0.419
	Sugar beet	Sd	Clivot et al. 2017 after Boliner et al. 2007		0.591	0.591	0.591	0.591	0.591	0.591	0.591	0.591	0.591	0.591	0.591	0.591	0.591	0.591	0.591	0.591	0.591	0.591	0.591	0.591	0.591	0.591	0.591	0.591	0.591	0.591	0.591	0.591	0.591	0.591	0.591	0.591	0.591	0.591
	Potatoes	Sd	Clivot et al. 2017 after Boliner et al. 2007		0.827	0.827	0.827	0.827	0.827	0.827	0.827	0.827	0.827	0.827	0.827	0.827	0.827	0.827	0.827	0.827	0.827	0.827	0.827	0.827	0.827	0.827	0.827	0.827	0.827	0.827	0.827	0.827	0.827	0.827	0.827	0.827	0.827	0.827
	Other roots	Sd	Clivot et al. 2017 after Boliner et al. 2007		0.67	0.67	0.67	0.67	0.67	0.67	0.67	0.67	0.67	0.67	0.67	0.67	0.67	0.67	0.67	0.67	0.67	0.67	0.67	0.67	0.67	0.67	0.67	0.67	0.67	0.67	0.67	0.67	0.67	0.67	0.67	0.67	0.67	0.67
	Green peas	Sd	Clivot et al. 2017 after Boliner et al. 2007		0.419	0.419	0.419	0.419	0.419	0.419	0.419	0.419	0.419	0.419	0.419	0.419	0.419	0.419	0.419	0.419	0.419	0.419	0.419	0.419	0.419	0.419	0.419	0.419	0.419	0.419	0.419	0.419	0.419	0.419	0.419	0.419	0.419	0.419
	Dry beans	Sd	Clivot et al. 2017 after Boliner et al. 2007		0.419	0.419	0.419	0.419	0.419	0.419	0.419	0.419	0.419	0.419	0.419	0.419	0.419	0.419	0.419	0.419	0.419	0.419	0.419	0.419	0.419	0.419	0.419	0.419	0.419	0.419	0.419	0.419	0.419	0.419	0.419	0.419	0.419	0.419
	Green beans	Sd	Clivot et al. 2017 after Boliner et al. 2007		0.419	0.419	0.419	0.419	0.419	0.419	0.419	0.419	0.419	0.419	0.419	0.419	0.419	0.419	0.419	0.419	0.419	0.419	0.419	0.419	0.419	0.419	0.419	0.419	0.419	0.419	0.419	0.419	0.419	0.419	0.419	0.419	0.419	0.419
	Dry vegetables	Sd	Clivot et al. 2017 after Boliner et al. 2007		0.419	0.419	0.419	0.419	0.419	0.419	0.419	0.419	0.419	0.419	0.419	0.419	0.419	0.419	0.419	0.419	0.419	0.419	0.419	0.419	0.419	0.419	0.419	0.419	0.419	0.419	0.419	0.419	0.419	0.419	0.419	0.419	0.419	0.419
	Dry fruits	Sd	Clivot et al. 2017 after Boliner et al. 2007		0.419	0.419	0.419	0.419	0.419	0.419	0.419	0.419	0.419	0.419	0.419	0.419	0.419	0.419	0.419	0.419	0.419	0.419	0.419	0.419	0.419	0.419	0.419	0.419	0.419	0.419	0.419	0.419	0.419	0.419	0.419	0.419	0.419	0.419
	Squash and melons	Sd	Clivot et al. 2017 after Boliner et al. 2007		0.417	0.417	0.417	0.417	0.417	0.417	0.417	0.417	0.417	0.417	0.417	0.417	0.417	0.417	0.417	0.417	0.417	0.417	0.417	0.417	0.417	0.417	0.417	0.417	0.417	0.417	0.417	0.417	0.417	0.417	0.417	0.417	0.417	0.417
	Cabbage	Sd	Clivot et al. 2017 after Boliner et al. 2007		0.417	0.417	0.417	0.417	0.417	0.417	0.417	0.417	0.417	0.417	0.417	0.417	0.417	0.417	0.417	0.417	0.417	0.417	0.417	0.417	0.417	0.417	0.417	0.417	0.417	0.417	0.417	0.417	0.417	0.417	0.417	0.417	0.417	0.417
	Leaves vegetables	Sd	Clivot et al. 2017 after Boliner et al. 2007		0.417	0.417	0.417	0.417	0.417	0.417	0.417	0.417	0.417	0.417	0.417	0.417	0.417	0.417	0.417	0.417	0.417	0.417	0.417	0.417	0.417	0.417	0.417	0.417	0.417	0.417	0.417	0.417	0.417	0.417	0.417	0.417	0.417	0.417
	Fruits	Sd	Clivot et al. 2017 after Boliner et al. 2007		0.417	0.417	0.417	0.417	0.417	0.417	0.417	0.417	0.417	0.417	0.417	0.417	0.417	0.417	0.417	0.417	0.417	0.417	0.417	0.417	0.417	0.417	0.417	0.417	0.417	0.417	0.417	0.417	0.417	0.417	0.417	0.417	0.417	0.417
	Olives	Sd	Clivot et al. 2017 after Boliner et al. 2007		0.417	0.417	0.417	0.417	0.417	0.417	0.417	0.417	0.417	0.417	0.417	0.417	0.417	0.417	0.417	0.417	0.417	0.417	0.417	0.417	0.417	0.417	0.417	0.417	0.417	0.417	0.417	0.417	0.417	0.417	0.417	0.417	0.417	0.417
	Citrus	Sd	Clivot et al. 2017 after Boliner et al. 2007		0.417	0.417	0.417	0.417	0.417	0.417	0.417	0.417	0.417	0.417	0.417	0.417	0.417	0.417	0.417	0.417	0.417	0.417	0.417	0.417	0.417	0.417	0.417	0.417	0.417	0.417	0.417	0.417	0.417	0.417	0.417	0.417	0.417	0.417
	Hemp	Sd	Clivot et al. 2017 after Boliner et al. 2007		0.417	0.417	0.417	0.417	0.417	0.417	0.417	0.417	0.417	0.417	0.417	0.417	0.417	0.417	0.417	0.417	0.417	0.417	0.417	0.417	0.417	0.417	0.417	0.417	0.417	0.417	0.417	0.417	0.417	0.417	0.417	0.417	0.417	0.417
	Flax	Sd	Clivot et al. 2017 after Boliner et al. 2007		0.417	0.417	0.417	0.417	0.417	0.417	0.417	0.417	0.417	0.417	0.417	0.417	0.417	0.417	0.417	0.417	0.417	0.417	0.417	0.417	0.417	0.417	0.417	0.417	0.417	0.417	0.417	0.417	0.417	0.417	0.417	0.417	0.417	0.417
	Forage maize	Sd	Clivot et al. 2017 after Boliner et al. 2007		0.759	0.759	0.759	0.759	0.759	0.759	0.759	0.759	0.759	0.759	0.759	0.759	0.759	0.759	0.759	0.759	0.759	0.759	0.759	0.759	0.759	0.759	0.759	0.759	0.759	0.759	0.759	0.759	0.759	0.759	0.759	0.759	0.759	0.759
	Forage cabbages	Sd	Clivot et al. 2017 after Boliner et al. 2007		0.416667	0.416667	0.416667	0.416667	0.416667	0.416667	0.416667	0.416667	0.416667	0.416667	0.416667	0.416667	0.416667	0.416667	0.416667	0.416667	0.416667	0.416667	0.416667	0.416667	0.416667	0.416667	0.416667	0.416667	0.416667	0.416667	0.416667	0.416667	0.416667	0.416667	0.416667	0.416667	0.416667	0.416667
	Alfalfa and clover	Sd	Clivot et al. 2017 after Boliner et al. 2007		0.475711	0.475711	0.475711	0.475711	0.475711	0.475711	0.475711	0.475711	0.475711	0.475711	0.475711	0.475711	0.475711	0.475711	0.475711	0.475711	0.475711	0.475711	0.475711	0.475711	0.475711	0.475711	0.475711	0.475711	0.475711	0.475711	0.475711	0.475711	0.475711	0.475711	0.475711	0.475711	0.475711	0.475711
	Non-legume temporary meadow	Sd	Clivot et al. 2017 after Boliner et al. 2007		0.416667	0.416667	0.416667	0.416667	0.416667	0.416667	0.416667	0.416667	0.416667	0.416667	0.416667	0.416667	0.416667	0.416667	0.416667	0.416667	0.416667	0.416667	0.416667	0.416667	0.416667	0.416667	0.416667	0.416667	0.416667	0.416667	0.416667	0.416667	0.416667	0.416667	0.416667	0.416667	0.416667	0.416667
	Natural meadow	Sd	Clivot et al. 2017 after Boliner et al. 2007		0.446189	0.446189	0.446189	0.446189	0.446189	0.446189	0.446189	0.446189	0.446189	0.446189	0.446189	0.446189	0.446189	0.446189	0.446189	0.446189	0.446189	0.446189	0.446189	0.446189	0.446189	0.446189	0.446189	0.446189	0.446189	0.446189	0.446189	0.446189	0.446189	0.446189	0.446189	0.446189	0.446189	0.446189
	Weed	Sd	Clivot et al. 2017 after Boliner et al. 2007		0.446189	0.446189	0.446189	0.446189	0.446189	0.446189	0.446189	0.446189	0.446189	0.446189	0.446189	0.446189	0.446189	0.446189	0.446189	0.446189	0.446189	0.446189	0.446189	0.446189	0.446189	0.446189	0.446189	0.446189	0.446189	0.446189	0.446189	0.446189	0.446189	0.446189	0.446189	0.446189	0.446189	0.446189
	Allocation of C in above-ground residues
	Wheat	Sd	Clivot et al. 2017 after Boliner et al. 2007		0.418271	0.418271	0.418271	0.418271	0.418271	0.418271	0.418271	0.418271	0.418271	0.418271	0.418271	0.418271	0.418271	0.418271	0.418271	0.418271	0.418271	0.418271	0.418271	0.418271	0.418271	0.418271	0.418271	0.418271	0.418271	0.418271	0.418271	0.418271	0.418271	0.418271	0.418271	0.418271	0.418271	0.418271
	Rye	Sd	Clivot et al. 2017 after Boliner et al. 2007		0.418271	0.418271	0.418271	0.418271	0.418271	0.418271	0.418271	0.418271	0.418271	0.418271	0.418271	0.418271	0.418271	0.418271	0.418271	0.418271	0.418271	0.418271	0.418271	0.418271	0.418271	0.418271	0.418271	0.418271	0.418271	0.418271	0.418271	0.418271	0.418271	0.418271	0.418271	0.418271	0.418271	0.418271
	Barley	Sd	Clivot et al. 2017 after Boliner et al. 2007		0.423114	0.423114	0.423114	0.423114	0.423114	0.423114	0.423114	0.423114	0.423114	0.423114	0.423114	0.423114	0.423114	0.423114	0.423114	0.423114	0.423114	0.423114	0.423114	0.423114	0.423114	0.423114	0.423114	0.423114	0.423114	0.423114	0.423114	0.423114	0.423114	0.423114	0.423114	0.423114	0.423114	0.423114
	Oat	Sd	Clivot et al. 2017 after Boliner et al. 2007		0.294	0.294	0.294	0.294	0.294	0.294	0.294	0.294	0.294	0.294	0.294	0.294	0.294	0.294	0.294	0.294	0.294	0.294	0.294	0.294	0.294	0.294	0.294	0.294	0.294	0.294	0.294	0.294	0.294	0.294	0.294	0.294	0.294	0.294
	Grain maize	Sd	Clivot et al. 2017 after Boliner et al. 2007		0.363	0.363	0.363	0.363	0.363	0.363	0.363	0.363	0.363	0.363	0.363	0.363	0.363	0.363	0.363	0.363	0.363	0.363	0.363	0.363	0.363	0.363	0.363	0.363	0.363	0.363	0.363	0.363	0.363	0.363	0.363	0.363	0.363	0.363
	Rice	Sd	Clivot et al. 2017 after Boliner et al. 2007		0.405794	0.405794	0.405794	0.405794	0.405794	0.405794	0.405794	0.405794	0.405794	0.405794	0.405794	0.405794	0.405794	0.405794	0.405794	0.405794	0.405794	0.405794	0.405794	0.405794	0.405794	0.405794	0.405794	0.405794	0.405794	0.405794	0.405794	0.405794	0.405794	0.405794	0.405794	0.405794	0.405794	0.405794
	Other cereals	Sd	Clivot et al. 2017 after Boliner et al. 2007		0.405794	0.405794	0.405794	0.405794	0.405794	0.405794	0.405794	0.405794	0.405794	0.405794	0.405794	0.405794	0.405794	0.405794	0.405794	0.405794	0.405794	0.405794	0.405794	0.405794	0.405794	0.405794	0.405794	0.405794	0.405794	0.405794	0.405794	0.405794	0.405794	0.405794	0.405794	0.405794	0.405794	0.405794
	Straw	Sd	Clivot et al. 2017 after Boliner et al. 2007
	Rapeseed	Sd	Clivot et al. 2017 after Boliner et al. 2007		0.602344	0.602344	0.602344	0.602344	0.602344	0.602344	0.602344	0.602344	0.602344	0.602344	0.602344	0.602344	0.602344	0.602344	0.602344	0.602344	0.602344	0.602344	0.602344	0.602344	0.602344	0.602344	0.602344	0.602344	0.602344	0.602344	0.602344	0.602344	0.602344	0.602344	0.602344	0.602344	0.602344	0.602344
	Sunflower	Sd	Clivot et al. 2017 after Boliner et al. 2007		0.53067	0.53067	0.53067	0.53067	0.53067	0.53067	0.53067	0.53067	0.53067	0.53067	0.53067	0.53067	0.53067	0.53067	0.53067	0.53067	0.53067	0.53067	0.53067	0.53067	0.53067	0.53067	0.53067	0.53067	0.53067	0.53067	0.53067	0.53067	0.53067	0.53067	0.53067	0.53067	0.53067	0.53067
	Soybean	Sd	Clivot et al. 2017 after Boliner et al. 2007		0.52439	0.52439	0.52439	0.52439	0.52439	0.52439	0.52439	0.52439	0.52439	0.52439	0.52439	0.52439	0.52439	0.52439	0.52439	0.52439	0.52439	0.52439	0.52439	0.52439	0.52439	0.52439	0.52439	0.52439	0.52439	0.52439	0.52439	0.52439	0.52439	0.52439	0.52439	0.52439	0.52439	0.52439
	Other oil crops	Sd	Clivot et al. 2017 after Boliner et al. 2007		0.552468	0.552468	0.552468	0.552468	0.552468	0.552468	0.552468	0.552468	0.552468	0.552468	0.552468	0.552468	0.552468	0.552468	0.552468	0.552468	0.552468	0.552468	0.552468	0.552468	0.552468	0.552468	0.552468	0.552468	0.552468	0.552468	0.552468	0.552468	0.552468	0.552468	0.552468	0.552468	0.552468	0.552468
	Horse beans and faba beans	Sd	Clivot et al. 2017 after Boliner et al. 2007		0.341443	0.341443	0.341443	0.341443	0.341443	0.341443	0.341443	0.341443	0.341443	0.341443	0.341443	0.341443	0.341443	0.341443	0.341443	0.341443	0.341443	0.341443	0.341443	0.341443	0.341443	0.341443	0.341443	0.341443	0.341443	0.341443	0.341443	0.341443	0.341443	0.341443	0.341443	0.341443	0.341443	0.341443
	Peas	Sd	Clivot et al. 2017 after Boliner et al. 2007		0.339355	0.339355	0.339355	0.339355	0.339355	0.339355	0.339355	0.339355	0.339355	0.339355	0.339355	0.339355	0.339355	0.339355	0.339355	0.339355	0.339355	0.339355	0.339355	0.339355	0.339355	0.339355	0.339355	0.339355	0.339355	0.339355	0.339355	0.339355	0.339355	0.339355	0.339355	0.339355	0.339355	0.339355
	Other protein crops	Sd	Clivot et al. 2017 after Boliner et al. 2007		0.340399	0.340399	0.340399	0.340399	0.340399	0.340399	0.340399	0.340399	0.340399	0.340399	0.340399	0.340399	0.340399	0.340399	0.340399	0.340399	0.340399	0.340399	0.340399	0.340399	0.340399	0.340399	0.340399	0.340399	0.340399	0.340399	0.340399	0.340399	0.340399	0.340399	0.340399	0.340399	0.340399	0.340399
	Sugar beet	Sd	Clivot et al. 2017 after Boliner et al. 2007		0.151039	0.151039	0.151039	0.151039	0.151039	0.151039	0.151039	0.151039	0.151039	0.151039	0.151039	0.151039	0.151039	0.151039	0.151039	0.151039	0.151039	0.151039	0.151039	0.151039	0.151039	0.151039	0.151039	0.151039	0.151039	0.151039	0.151039	0.151039	0.151039	0.151039	0.151039	0.151039	0.151039	0.151039
	Potatoes	Sd	Clivot et al. 2017 after Boliner et al. 2007		0.150284	0.150284	0.150284	0.150284	0.150284	0.150284	0.150284	0.150284	0.150284	0.150284	0.150284	0.150284	0.150284	0.150284	0.150284	0.150284	0.150284	0.150284	0.150284	0.150284	0.150284	0.150284	0.150284	0.150284	0.150284	0.150284	0.150284	0.150284	0.150284	0.150284	0.150284	0.150284	0.150284	0.150284
	Other roots	Sd	Clivot et al. 2017 after Boliner et al. 2007		0.150787	0.150787	0.150787	0.150787	0.150787	0.150787	0.150787	0.150787	0.150787	0.150787	0.150787	0.150787	0.150787	0.150787	0.150787	0.150787	0.150787	0.150787	0.150787	0.150787	0.150787	0.150787	0.150787	0.150787	0.150787	0.150787	0.150787	0.150787	0.150787	0.150787	0.150787	0.150787	0.150787	0.150787
	Green peas	Sd	Clivot et al. 2017 after Boliner et al. 2007		0.340399	0.340399	0.340399	0.340399	0.340399	0.340399	0.340399	0.340399	0.340399	0.340399	0.340399	0.340399	0.340399	0.340399	0.340399	0.340399	0.340399	0.340399	0.340399	0.340399	0.340399	0.340399	0.340399	0.340399	0.340399	0.340399	0.340399	0.340399	0.340399	0.340399	0.340399	0.340399	0.340399	0.340399
	Dry beans	Sd	Clivot et al. 2017 after Boliner et al. 2007		0.340399	0.340399	0.340399	0.340399	0.340399	0.340399	0.340399	0.340399	0.340399	0.340399	0.340399	0.340399	0.340399	0.340399	0.340399	0.340399	0.340399	0.340399	0.340399	0.340399	0.340399	0.340399	0.340399	0.340399	0.340399	0.340399	0.340399	0.340399	0.340399	0.340399	0.340399	0.340399	0.340399	0.340399
	Green beans	Sd	Clivot et al. 2017 after Boliner et al. 2007		0.340399	0.340399	0.340399	0.340399	0.340399	0.340399	0.340399	0.340399	0.340399	0.340399	0.340399	0.340399	0.340399	0.340399	0.340399	0.340399	0.340399	0.340399	0.340399	0.340399	0.340399	0.340399	0.340399	0.340399	0.340399	0.340399	0.340399	0.340399	0.340399	0.340399	0.340399	0.340399	0.340399	0.340399
	Dry vegetables	Sd	Clivot et al. 2017 after Boliner et al. 2007		0.340399	0.340399	0.340399	0.340399	0.340399	0.340399	0.340399	0.340399	0.340399	0.340399	0.340399	0.340399	0.340399	0.340399	0.340399	0.340399	0.340399	0.340399	0.340399	0.340399	0.340399	0.340399	0.340399	0.340399	0.340399	0.340399	0.340399	0.340399	0.340399	0.340399	0.340399	0.340399	0.340399	0.340399
	Dry fruits	Sd	Clivot et al. 2017 after Boliner et al. 2007		0.340399	0.340399	0.340399	0.340399	0.340399	0.340399	0.340399	0.340399	0.340399	0.340399	0.340399	0.340399	0.340399	0.340399	0.340399	0.340399	0.340399	0.340399	0.340399	0.340399	0.340399	0.340399	0.340399	0.340399	0.340399	0.340399	0.340399	0.340399	0.340399	0.340399	0.340399	0.340399	0.340399	0.340399
	Squash and melons	Sd	Clivot et al. 2017 after Boliner et al. 2007		0.083333	0.083333	0.083333	0.083333	0.083333	0.083333	0.083333	0.083333	0.083333	0.083333	0.083333	0.083333	0.083333	0.083333	0.083333	0.083333	0.083333	0.083333	0.083333	0.083333	0.083333	0.083333	0.083333	0.083333	0.083333	0.083333	0.083333	0.083333	0.083333	0.083333	0.083333	0.083333	0.083333	0.083333
	Cabbage	Sd	Clivot et al. 2017 after Boliner et al. 2007		0.083333	0.083333	0.083333	0.083333	0.083333	0.083333	0.083333	0.083333	0.083333	0.083333	0.083333	0.083333	0.083333	0.083333	0.083333	0.083333	0.083333	0.083333	0.083333	0.083333	0.083333	0.083333	0.083333	0.083333	0.083333	0.083333	0.083333	0.083333	0.083333	0.083333	0.083333	0.083333	0.083333	0.083333
	Leaves vegetables	Sd	Clivot et al. 2017 after Boliner et al. 2007		0.083333	0.083333	0.083333	0.083333	0.083333	0.083333	0.083333	0.083333	0.083333	0.083333	0.083333	0.083333	0.083333	0.083333	0.083333	0.083333	0.083333	0.083333	0.083333	0.083333	0.083333	0.083333	0.083333	0.083333	0.083333	0.083333	0.083333	0.083333	0.083333	0.083333	0.083333	0.083333	0.083333	0.083333
	Fruits	Sd	Clivot et al. 2017 after Boliner et al. 2007		0.083333	0.083333	0.083333	0.083333	0.083333	0.083333	0.083333	0.083333	0.083333	0.083333	0.083333	0.083333	0.083333	0.083333	0.083333	0.083333	0.083333	0.083333	0.083333	0.083333	0.083333	0.083333	0.083333	0.083333	0.083333	0.083333	0.083333	0.083333	0.083333	0.083333	0.083333	0.083333	0.083333	0.083333
	Olives	Sd	Clivot et al. 2017 after Boliner et al. 2007		0.083333	0.083333	0.083333	0.083333	0.083333	0.083333	0.083333	0.083333	0.083333	0.083333	0.083333	0.083333	0.083333	0.083333	0.083333	0.083333	0.083333	0.083333	0.083333	0.083333	0.083333	0.083333	0.083333	0.083333	0.083333	0.083333	0.083333	0.083333	0.083333	0.083333	0.083333	0.083333	0.083333	0.083333
	Citrus	Sd	Clivot et al. 2017 after Boliner et al. 2007		0.083333	0.083333	0.083333	0.083333	0.083333	0.083333	0.083333	0.083333	0.083333	0.083333	0.083333	0.083333	0.083333	0.083333	0.083333	0.083333	0.083333	0.083333	0.083333	0.083333	0.083333	0.083333	0.083333	0.083333	0.083333	0.083333	0.083333	0.083333	0.083333	0.083333	0.083333	0.083333	0.083333	0.083333
	Hemp	Sd	Clivot et al. 2017 after Boliner et al. 2007		0.083333	0.083333	0.083333	0.083333	0.083333	0.083333	0.083333	0.083333	0.083333	0.083333	0.083333	0.083333	0.083333	0.083333	0.083333	0.083333	0.083333	0.083333	0.083333	0.083333	0.083333	0.083333	0.083333	0.083333	0.083333	0.083333	0.083333	0.083333	0.083333	0.083333	0.083333	0.083333	0.083333	0.083333
	Flax	Sd	Clivot et al. 2017 after Boliner et al. 2007		0.083333	0.083333	0.083333	0.083333	0.083333	0.083333	0.083333	0.083333	0.083333	0.083333	0.083333	0.083333	0.083333	0.083333	0.083333	0.083333	0.083333	0.083333	0.083333	0.083333	0.083333	0.083333	0.083333	0.083333	0.083333	0.083333	0.083333	0.083333	0.083333	0.083333	0.083333	0.083333	0.083333	0.083333
	Forage maize	Sd	Clivot et al. 2017 after Boliner et al. 2007		0.029559	0.029559	0.029559	0.029559	0.029559	0.029559	0.029559	0.029559	0.029559	0.029559	0.029559	0.029559	0.029559	0.029559	0.029559	0.029559	0.029559	0.029559	0.029559	0.029559	0.029559	0.029559	0.029559	0.029559	0.029559	0.029559	0.029559	0.029559	0.029559	0.029559	0.029559	0.029559	0.029559	0.029559
	Forage cabbages	Sd	Clivot et al. 2017 after Boliner et al. 2007		0.083333	0.083333	0.083333	0.083333	0.083333	0.083333	0.083333	0.083333	0.083333	0.083333	0.083333	0.083333	0.083333	0.083333	0.083333	0.083333	0.083333	0.083333	0.083333	0.083333	0.083333	0.083333	0.083333	0.083333	0.083333	0.083333	0.083333	0.083333	0.083333	0.083333	0.083333	0.083333	0.083333	0.083333
	Alfalfa and clover	Sd	Clivot et al. 2017 after Boliner et al. 2007		0.071375	0.071375	0.071375	0.071375	0.071375	0.071375	0.071375	0.071375	0.071375	0.071375	0.071375	0.071375	0.071375	0.071375	0.071375	0.071375	0.071375	0.071375	0.071375	0.071375	0.071375	0.071375	0.071375	0.071375	0.071375	0.071375	0.071375	0.071375	0.071375	0.071375	0.071375	0.071375	0.071375	0.071375
	Non-legume temporary meadow	Sd	Clivot et al. 2017 after Boliner et al. 2007		0.083333	0.083333	0.083333	0.083333	0.083333	0.083333	0.083333	0.083333	0.083333	0.083333	0.083333	0.083333	0.083333	0.083333	0.083333	0.083333	0.083333	0.083333	0.083333	0.083333	0.083333	0.083333	0.083333	0.083333	0.083333	0.083333	0.083333	0.083333	0.083333	0.083333	0.083333	0.083333	0.083333	0.083333
	Natural meadow	Sd	Clivot et al. 2017 after Boliner et al. 2007		0.077354	0.077354	0.077354	0.077354	0.077354	0.077354	0.077354	0.077354	0.077354	0.077354	0.077354	0.077354	0.077354	0.077354	0.077354	0.077354	0.077354	0.077354	0.077354	0.077354	0.077354	0.077354	0.077354	0.077354	0.077354	0.077354	0.077354	0.077354	0.077354	0.077354	0.077354	0.077354	0.077354	0.077354
	Weed	Sd	Clivot et al. 2017 after Boliner et al. 2007		0.077354	0.077354	0.077354	0.077354	0.077354	0.077354	0.077354	0.077354	0.077354	0.077354	0.077354	0.077354	0.077354	0.077354	0.077354	0.077354	0.077354	0.077354	0.077354	0.077354	0.077354	0.077354	0.077354	0.077354	0.077354	0.077354	0.077354	0.077354	0.077354	0.077354	0.077354	0.077354	0.077354	0.077354
	Allocation of C in belowground residues
	Wheat	Sd	Clivot et al. 2017 after Boliner et al. 2007		0.109206	0.109206	0.109206	0.109206	0.109206	0.109206	0.109206	0.109206	0.109206	0.109206	0.109206	0.109206	0.109206	0.109206	0.109206	0.109206	0.109206	0.109206	0.109206	0.109206	0.109206	0.109206	0.109206	0.109206	0.109206	0.109206	0.109206	0.109206	0.109206	0.109206	0.109206	0.109206	0.109206	0.109206
	Rye	Sd	Clivot et al. 2017 after Boliner et al. 2007		0.109206	0.109206	0.109206	0.109206	0.109206	0.109206	0.109206	0.109206	0.109206	0.109206	0.109206	0.109206	0.109206	0.109206	0.109206	0.109206	0.109206	0.109206	0.109206	0.109206	0.109206	0.109206	0.109206	0.109206	0.109206	0.109206	0.109206	0.109206	0.109206	0.109206	0.109206	0.109206	0.109206	0.109206
	Barley	Sd	Clivot et al. 2017 after Boliner et al. 2007		0.082938	0.082938	0.082938	0.082938	0.082938	0.082938	0.082938	0.082938	0.082938	0.082938	0.082938	0.082938	0.082938	0.082938	0.082938	0.082938	0.082938	0.082938	0.082938	0.082938	0.082938	0.082938	0.082938	0.082938	0.082938	0.082938	0.082938	0.082938	0.082938	0.082938	0.082938	0.082938	0.082938	0.082938
	Oat	Sd	Clivot et al. 2017 after Boliner et al. 2007		0.227	0.227	0.227	0.227	0.227	0.227	0.227	0.227	0.227	0.227	0.227	0.227	0.227	0.227	0.227	0.227	0.227	0.227	0.227	0.227	0.227	0.227	0.227	0.227	0.227	0.227	0.227	0.227	0.227	0.227	0.227	0.227	0.227	0.227
	Grain maize	Sd	Clivot et al. 2017 after Boliner et al. 2007		0.128106	0.128106	0.128106	0.128106	0.128106	0.128106	0.128106	0.128106	0.128106	0.128106	0.128106	0.128106	0.128106	0.128106	0.128106	0.128106	0.128106	0.128106	0.128106	0.128106	0.128106	0.128106	0.128106	0.128106	0.128106	0.128106	0.128106	0.128106	0.128106	0.128106	0.128106	0.128106	0.128106	0.128106
	Rice	Sd	Clivot et al. 2017 after Boliner et al. 2007		0.120082	0.120082	0.120082	0.120082	0.120082	0.120082	0.120082	0.120082	0.120082	0.120082	0.120082	0.120082	0.120082	0.120082	0.120082	0.120082	0.120082	0.120082	0.120082	0.120082	0.120082	0.120082	0.120082	0.120082	0.120082	0.120082	0.120082	0.120082	0.120082	0.120082	0.120082	0.120082	0.120082	0.120082
	Other cereals	Sd	Clivot et al. 2017 after Boliner et al. 2007		0.120082	0.120082	0.120082	0.120082	0.120082	0.120082	0.120082	0.120082	0.120082	0.120082	0.120082	0.120082	0.120082	0.120082	0.120082	0.120082	0.120082	0.120082	0.120082	0.120082	0.120082	0.120082	0.120082	0.120082	0.120082	0.120082	0.120082	0.120082	0.120082	0.120082	0.120082	0.120082	0.120082	0.120082
	Straw	Sd	Clivot et al. 2017 after Boliner et al. 2007
	Rapeseed	Sd	Clivot et al. 2017 after Boliner et al. 2007		0.142438	0.142438	0.142438	0.142438	0.142438	0.142438	0.142438	0.142438	0.142438	0.142438	0.142438	0.142438	0.142438	0.142438	0.142438	0.142438	0.142438	0.142438	0.142438	0.142438	0.142438	0.142438	0.142438	0.142438	0.142438	0.142438	0.142438	0.142438	0.142438	0.142438	0.142438	0.142438	0.142438	0.142438
	Sunflower	Sd	Clivot et al. 2017 after Boliner et al. 2007		0.12685	0.12685	0.12685	0.12685	0.12685	0.12685	0.12685	0.12685	0.12685	0.12685	0.12685	0.12685	0.12685	0.12685	0.12685	0.12685	0.12685	0.12685	0.12685	0.12685	0.12685	0.12685	0.12685	0.12685	0.12685	0.12685	0.12685	0.12685	0.12685	0.12685	0.12685	0.12685	0.12685	0.12685
	Soybean	Sd	Clivot et al. 2017 after Boliner et al. 2007		0.135699	0.135699	0.135699	0.135699	0.135699	0.135699	0.135699	0.135699	0.135699	0.135699	0.135699	0.135699	0.135699	0.135699	0.135699	0.135699	0.135699	0.135699	0.135699	0.135699	0.135699	0.135699	0.135699	0.135699	0.135699	0.135699	0.135699	0.135699	0.135699	0.135699	0.135699	0.135699	0.135699	0.135699
	Other oil crops	Sd	Clivot et al. 2017 after Boliner et al. 2007		0.134996	0.134996	0.134996	0.134996	0.134996	0.134996	0.134996	0.134996	0.134996	0.134996	0.134996	0.134996	0.134996	0.134996	0.134996	0.134996	0.134996	0.134996	0.134996	0.134996	0.134996	0.134996	0.134996	0.134996	0.134996	0.134996	0.134996	0.134996	0.134996	0.134996	0.134996	0.134996	0.134996	0.134996
	Horse beans and faba beans	Sd	Clivot et al. 2017 after Boliner et al. 2007		0.165289	0.165289	0.165289	0.165289	0.165289	0.165289	0.165289	0.165289	0.165289	0.165289	0.165289	0.165289	0.165289	0.165289	0.165289	0.165289	0.165289	0.165289	0.165289	0.165289	0.165289	0.165289	0.165289	0.165289	0.165289	0.165289	0.165289	0.165289	0.165289	0.165289	0.165289	0.165289	0.165289	0.165289
	Peas	Sd	Clivot et al. 2017 after Boliner et al. 2007		0.12685	0.12685	0.12685	0.12685	0.12685	0.12685	0.12685	0.12685	0.12685	0.12685	0.12685	0.12685	0.12685	0.12685	0.12685	0.12685	0.12685	0.12685	0.12685	0.12685	0.12685	0.12685	0.12685	0.12685	0.12685	0.12685	0.12685	0.12685	0.12685	0.12685	0.12685	0.12685	0.12685	0.12685
	Other protein crops	Sd	Clivot et al. 2017 after Boliner et al. 2007		0.14607	0.14607	0.14607	0.14607	0.14607	0.14607	0.14607	0.14607	0.14607	0.14607	0.14607	0.14607	0.14607	0.14607	0.14607	0.14607	0.14607	0.14607	0.14607	0.14607	0.14607	0.14607	0.14607	0.14607	0.14607	0.14607	0.14607	0.14607	0.14607	0.14607	0.14607	0.14607	0.14607	0.14607
	Sugar beet	Sd	Clivot et al. 2017 after Boliner et al. 2007		0.159341	0.159341	0.159341	0.159341	0.159341	0.159341	0.159341	0.159341	0.159341	0.159341	0.159341	0.159341	0.159341	0.159341	0.159341	0.159341	0.159341	0.159341	0.159341	0.159341	0.159341	0.159341	0.159341	0.159341	0.159341	0.159341	0.159341	0.159341	0.159341	0.159341	0.159341	0.159341	0.159341	0.159341
	Potatoes	Sd	Clivot et al. 2017 after Boliner et al. 2007		0.023156	0.023156	0.023156	0.023156	0.023156	0.023156	0.023156	0.023156	0.023156	0.023156	0.023156	0.023156	0.023156	0.023156	0.023156	0.023156	0.023156	0.023156	0.023156	0.023156	0.023156	0.023156	0.023156	0.023156	0.023156	0.023156	0.023156	0.023156	0.023156	0.023156	0.023156	0.023156	0.023156	0.023156
	Other roots	Sd	Clivot et al. 2017 after Boliner et al. 2007		0.113946	0.113946	0.113946	0.113946	0.113946	0.113946	0.113946	0.113946	0.113946	0.113946	0.113946	0.113946	0.113946	0.113946	0.113946	0.113946	0.113946	0.113946	0.113946	0.113946	0.113946	0.113946	0.113946	0.113946	0.113946	0.113946	0.113946	0.113946	0.113946	0.113946	0.113946	0.113946	0.113946	0.113946
	Green peas	Sd	Clivot et al. 2017 after Boliner et al. 2007		0.14607	0.14607	0.14607	0.14607	0.14607	0.14607	0.14607	0.14607	0.14607	0.14607	0.14607	0.14607	0.14607	0.14607	0.14607	0.14607	0.14607	0.14607	0.14607	0.14607	0.14607	0.14607	0.14607	0.14607	0.14607	0.14607	0.14607	0.14607	0.14607	0.14607	0.14607	0.14607	0.14607	0.14607
	Dry beans	Sd	Clivot et al. 2017 after Boliner et al. 2007		0.14607	0.14607	0.14607	0.14607	0.14607	0.14607	0.14607	0.14607	0.14607	0.14607	0.14607	0.14607	0.14607	0.14607	0.14607	0.14607	0.14607	0.14607	0.14607	0.14607	0.14607	0.14607	0.14607	0.14607	0.14607	0.14607	0.14607	0.14607	0.14607	0.14607	0.14607	0.14607	0.14607	0.14607
	Green beans	Sd	Clivot et al. 2017 after Boliner et al. 2007		0.14607	0.14607	0.14607	0.14607	0.14607	0.14607	0.14607	0.14607	0.14607	0.14607	0.14607	0.14607	0.14607	0.14607	0.14607	0.14607	0.14607	0.14607	0.14607	0.14607	0.14607	0.14607	0.14607	0.14607	0.14607	0.14607	0.14607	0.14607	0.14607	0.14607	0.14607	0.14607	0.14607	0.14607
	Dry vegetables	Sd	Clivot et al. 2017 after Boliner et al. 2007		0.14607	0.14607	0.14607	0.14607	0.14607	0.14607	0.14607	0.14607	0.14607	0.14607	0.14607	0.14607	0.14607	0.14607	0.14607	0.14607	0.14607	0.14607	0.14607	0.14607	0.14607	0.14607	0.14607	0.14607	0.14607	0.14607	0.14607	0.14607	0.14607	0.14607	0.14607	0.14607	0.14607	0.14607
	Dry fruits	Sd	Clivot et al. 2017 after Boliner et al. 2007		0.14607	0.14607	0.14607	0.14607	0.14607	0.14607	0.14607	0.14607	0.14607	0.14607	0.14607	0.14607	0.14607	0.14607	0.14607	0.14607	0.14607	0.14607	0.14607	0.14607	0.14607	0.14607	0.14607	0.14607	0.14607	0.14607	0.14607	0.14607	0.14607	0.14607	0.14607	0.14607	0.14607	0.14607
	Squash and melons	Sd	Clivot et al. 2017 after Boliner et al. 2007		0.30303	0.30303	0.30303	0.30303	0.30303	0.30303	0.30303	0.30303	0.30303	0.30303	0.30303	0.30303	0.30303	0.30303	0.30303	0.30303	0.30303	0.30303	0.30303	0.30303	0.30303	0.30303	0.30303	0.30303	0.30303	0.30303	0.30303	0.30303	0.30303	0.30303	0.30303	0.30303	0.30303	0.30303
	Cabbage	Sd	Clivot et al. 2017 after Boliner et al. 2007		0.30303	0.30303	0.30303	0.30303	0.30303	0.30303	0.30303	0.30303	0.30303	0.30303	0.30303	0.30303	0.30303	0.30303	0.30303	0.30303	0.30303	0.30303	0.30303	0.30303	0.30303	0.30303	0.30303	0.30303	0.30303	0.30303	0.30303	0.30303	0.30303	0.30303	0.30303	0.30303	0.30303	0.30303
	Leaves vegetables	Sd	Clivot et al. 2017 after Boliner et al. 2007		0.30303	0.30303	0.30303	0.30303	0.30303	0.30303	0.30303	0.30303	0.30303	0.30303	0.30303	0.30303	0.30303	0.30303	0.30303	0.30303	0.30303	0.30303	0.30303	0.30303	0.30303	0.30303	0.30303	0.30303	0.30303	0.30303	0.30303	0.30303	0.30303	0.30303	0.30303	0.30303	0.30303	0.30303
	Fruits	Sd	Clivot et al. 2017 after Boliner et al. 2007		0.30303	0.30303	0.30303	0.30303	0.30303	0.30303	0.30303	0.30303	0.30303	0.30303	0.30303	0.30303	0.30303	0.30303	0.30303	0.30303	0.30303	0.30303	0.30303	0.30303	0.30303	0.30303	0.30303	0.30303	0.30303	0.30303	0.30303	0.30303	0.30303	0.30303	0.30303	0.30303	0.30303	0.30303
	Olives	Sd	Clivot et al. 2017 after Boliner et al. 2007		0.30303	0.30303	0.30303	0.30303	0.30303	0.30303	0.30303	0.30303	0.30303	0.30303	0.30303	0.30303	0.30303	0.30303	0.30303	0.30303	0.30303	0.30303	0.30303	0.30303	0.30303	0.30303	0.30303	0.30303	0.30303	0.30303	0.30303	0.30303	0.30303	0.30303	0.30303	0.30303	0.30303	0.30303
	Citrus	Sd	Clivot et al. 2017 after Boliner et al. 2007		0.30303	0.30303	0.30303	0.30303	0.30303	0.30303	0.30303	0.30303	0.30303	0.30303	0.30303	0.30303	0.30303	0.30303	0.30303	0.30303	0.30303	0.30303	0.30303	0.30303	0.30303	0.30303	0.30303	0.30303	0.30303	0.30303	0.30303	0.30303	0.30303	0.30303	0.30303	0.30303	0.30303	0.30303
	Hemp	Sd	Clivot et al. 2017 after Boliner et al. 2007		0.30303	0.30303	0.30303	0.30303	0.30303	0.30303	0.30303	0.30303	0.30303	0.30303	0.30303	0.30303	0.30303	0.30303	0.30303	0.30303	0.30303	0.30303	0.30303	0.30303	0.30303	0.30303	0.30303	0.30303	0.30303	0.30303	0.30303	0.30303	0.30303	0.30303	0.30303	0.30303	0.30303	0.30303
	Flax	Sd	Clivot et al. 2017 after Boliner et al. 2007		0.30303	0.30303	0.30303	0.30303	0.30303	0.30303	0.30303	0.30303	0.30303	0.30303	0.30303	0.30303	0.30303	0.30303	0.30303	0.30303	0.30303	0.30303	0.30303	0.30303	0.30303	0.30303	0.30303	0.30303	0.30303	0.30303	0.30303	0.30303	0.30303	0.30303	0.30303	0.30303	0.30303	0.30303
	Forage maize	Sd	Clivot et al. 2017 after Boliner et al. 2007		0.128106	0.128106	0.128106	0.128106	0.128106	0.128106	0.128106	0.128106	0.128106	0.128106	0.128106	0.128106	0.128106	0.128106	0.128106	0.128106	0.128106	0.128106	0.128106	0.128106	0.128106	0.128106	0.128106	0.128106	0.128106	0.128106	0.128106	0.128106	0.128106	0.128106	0.128106	0.128106	0.128106	0.128106
	Forage cabbages	Sd	Clivot et al. 2017 after Boliner et al. 2007		0.30303	0.30303	0.30303	0.30303	0.30303	0.30303	0.30303	0.30303	0.30303	0.30303	0.30303	0.30303	0.30303	0.30303	0.30303	0.30303	0.30303	0.30303	0.30303	0.30303	0.30303	0.30303	0.30303	0.30303	0.30303	0.30303	0.30303	0.30303	0.30303	0.30303	0.30303	0.30303	0.30303	0.30303
	Alfalfa and clover	Sd	Clivot et al. 2017 after Boliner et al. 2007		0.274493	0.274493	0.274493	0.274493	0.274493	0.274493	0.274493	0.274493	0.274493	0.274493	0.274493	0.274493	0.274493	0.274493	0.274493	0.274493	0.274493	0.274493	0.274493	0.274493	0.274493	0.274493	0.274493	0.274493	0.274493	0.274493	0.274493	0.274493	0.274493	0.274493	0.274493	0.274493	0.274493	0.274493
	Non-legume temporary meadow	Sd	Clivot et al. 2017 after Boliner et al. 2007		0.30303	0.30303	0.30303	0.30303	0.30303	0.30303	0.30303	0.30303	0.30303	0.30303	0.30303	0.30303	0.30303	0.30303	0.30303	0.30303	0.30303	0.30303	0.30303	0.30303	0.30303	0.30303	0.30303	0.30303	0.30303	0.30303	0.30303	0.30303	0.30303	0.30303	0.30303	0.30303	0.30303	0.30303
	Natural meadow	Sd	Clivot et al. 2017 after Boliner et al. 2007		0.288762	0.288762	0.288762	0.288762	0.288762	0.288762	0.288762	0.288762	0.288762	0.288762	0.288762	0.288762	0.288762	0.288762	0.288762	0.288762	0.288762	0.288762	0.288762	0.288762	0.288762	0.288762	0.288762	0.288762	0.288762	0.288762	0.288762	0.288762	0.288762	0.288762	0.288762	0.288762	0.288762	0.288762
	Weed	Sd	Clivot et al. 2017 after Boliner et al. 2007		0.288762	0.288762	0.288762	0.288762	0.288762	0.288762	0.288762	0.288762	0.288762	0.288762	0.288762	0.288762	0.288762	0.288762	0.288762	0.288762	0.288762	0.288762	0.288762	0.288762	0.288762	0.288762	0.288762	0.288762	0.288762	0.288762	0.288762	0.288762	0.288762	0.288762	0.288762	0.288762	0.288762	0.288762
	Share of root in the top 30 cm of soil
	Wheat	Sd	Clivot et al. 2017 after Fan et al. 2016		0.71	0.71	0.71	0.71	0.71	0.71	0.71	0.71	0.71	0.71	0.71	0.71	0.71	0.71	0.71	0.71	0.71	0.71	0.71	0.71	0.71	0.71	0.71	0.71	0.71	0.71	0.71	0.71	0.71	0.71	0.71	0.71	0.71	0.71
	Rye	Sd	Clivot et al. 2017 after Fan et al. 2016		0.71	0.71	0.71	0.71	0.71	0.71	0.71	0.71	0.71	0.71	0.71	0.71	0.71	0.71	0.71	0.71	0.71	0.71	0.71	0.71	0.71	0.71	0.71	0.71	0.71	0.71	0.71	0.71	0.71	0.71	0.71	0.71	0.71	0.71
	Barley	Sd	Clivot et al. 2017 after Fan et al. 2016		0.84	0.84	0.84	0.84	0.84	0.84	0.84	0.84	0.84	0.84	0.84	0.84	0.84	0.84	0.84	0.84	0.84	0.84	0.84	0.84	0.84	0.84	0.84	0.84	0.84	0.84	0.84	0.84	0.84	0.84	0.84	0.84	0.84	0.84
	Oat	Sd	Clivot et al. 2017 after Fan et al. 2016		0.85	0.85	0.85	0.85	0.85	0.85	0.85	0.85	0.85	0.85	0.85	0.85	0.85	0.85	0.85	0.85	0.85	0.85	0.85	0.85	0.85	0.85	0.85	0.85	0.85	0.85	0.85	0.85	0.85	0.85	0.85	0.85	0.85	0.85
	Grain maize	Sd	Clivot et al. 2017 after Fan et al. 2016		0.77	0.77	0.77	0.77	0.77	0.77	0.77	0.77	0.77	0.77	0.77	0.77	0.77	0.77	0.77	0.77	0.77	0.77	0.77	0.77	0.77	0.77	0.77	0.77	0.77	0.77	0.77	0.77	0.77	0.77	0.77	0.77	0.77	0.77
	Rice	Sd	Clivot et al. 2017 after Fan et al. 2016		0.79	0.79	0.79	0.79	0.79	0.79	0.79	0.79	0.79	0.79	0.79	0.79	0.79	0.79	0.79	0.79	0.79	0.79	0.79	0.79	0.79	0.79	0.79	0.79	0.79	0.79	0.79	0.79	0.79	0.79	0.79	0.79	0.79	0.79
	Other cereals	Sd	Clivot et al. 2017 after Fan et al. 2016		0.79	0.79	0.79	0.79	0.79	0.79	0.79	0.79	0.79	0.79	0.79	0.79	0.79	0.79	0.79	0.79	0.79	0.79	0.79	0.79	0.79	0.79	0.79	0.79	0.79	0.79	0.79	0.79	0.79	0.79	0.79	0.79	0.79	0.79
	Straw	Sd	Clivot et al. 2017 after Fan et al. 2016
	Rapeseed	Sd	Clivot et al. 2017 after Fan et al. 2016		0.92	0.92	0.92	0.92	0.92	0.92	0.92	0.92	0.92	0.92	0.92	0.92	0.92	0.92	0.92	0.92	0.92	0.92	0.92	0.92	0.92	0.92	0.92	0.92	0.92	0.92	0.92	0.92	0.92	0.92	0.92	0.92	0.92	0.92
	Sunflower	Sd	Clivot et al. 2017 after Fan et al. 2016		0.89	0.89	0.89	0.89	0.89	0.89	0.89	0.89	0.89	0.89	0.89	0.89	0.89	0.89	0.89	0.89	0.89	0.89	0.89	0.89	0.89	0.89	0.89	0.89	0.89	0.89	0.89	0.89	0.89	0.89	0.89	0.89	0.89	0.89
	Soybean	Sd	Clivot et al. 2017 after Fan et al. 2016		0.85	0.85	0.85	0.85	0.85	0.85	0.85	0.85	0.85	0.85	0.85	0.85	0.85	0.85	0.85	0.85	0.85	0.85	0.85	0.85	0.85	0.85	0.85	0.85	0.85	0.85	0.85	0.85	0.85	0.85	0.85	0.85	0.85	0.85
	Other oil crops	Sd	Clivot et al. 2017 after Fan et al. 2016		0.89	0.89	0.89	0.89	0.89	0.89	0.89	0.89	0.89	0.89	0.89	0.89	0.89	0.89	0.89	0.89	0.89	0.89	0.89	0.89	0.89	0.89	0.89	0.89	0.89	0.89	0.89	0.89	0.89	0.89	0.89	0.89	0.89	0.89
	Horse beans and faba beans	Sd	Clivot et al. 2017 after Fan et al. 2016		0.7	0.7	0.7	0.7	0.7	0.7	0.7	0.7	0.7	0.7	0.7	0.7	0.7	0.7	0.7	0.7	0.7	0.7	0.7	0.7	0.7	0.7	0.7	0.7	0.7	0.7	0.7	0.7	0.7	0.7	0.7	0.7	0.7	0.7
	Peas	Sd	Clivot et al. 2017 after Fan et al. 2016		0.68	0.68	0.68	0.68	0.68	0.68	0.68	0.68	0.68	0.68	0.68	0.68	0.68	0.68	0.68	0.68	0.68	0.68	0.68	0.68	0.68	0.68	0.68	0.68	0.68	0.68	0.68	0.68	0.68	0.68	0.68	0.68	0.68	0.68
	Other protein crops	Sd	Clivot et al. 2017 after Fan et al. 2016		0.69	0.69	0.69	0.69	0.69	0.69	0.69	0.69	0.69	0.69	0.69	0.69	0.69	0.69	0.69	0.69	0.69	0.69	0.69	0.69	0.69	0.69	0.69	0.69	0.69	0.69	0.69	0.69	0.69	0.69	0.69	0.69	0.69	0.69
	Sugar beet	Sd	Clivot et al. 2017 after Fan et al. 2016		0.76	0.76	0.76	0.76	0.76	0.76	0.76	0.76	0.76	0.76	0.76	0.76	0.76	0.76	0.76	0.76	0.76	0.76	0.76	0.76	0.76	0.76	0.76	0.76	0.76	0.76	0.76	0.76	0.76	0.76	0.76	0.76	0.76	0.76
	Potatoes	Sd	Clivot et al. 2017 after Fan et al. 2016		0.76	0.76	0.76	0.76	0.76	0.76	0.76	0.76	0.76	0.76	0.76	0.76	0.76	0.76	0.76	0.76	0.76	0.76	0.76	0.76	0.76	0.76	0.76	0.76	0.76	0.76	0.76	0.76	0.76	0.76	0.76	0.76	0.76	0.76
	Other roots	Sd	Clivot et al. 2017 after Fan et al. 2016		0.76	0.76	0.76	0.76	0.76	0.76	0.76	0.76	0.76	0.76	0.76	0.76	0.76	0.76	0.76	0.76	0.76	0.76	0.76	0.76	0.76	0.76	0.76	0.76	0.76	0.76	0.76	0.76	0.76	0.76	0.76	0.76	0.76	0.76
	Green peas	Sd	Clivot et al. 2017 after Fan et al. 2016		0.69	0.69	0.69	0.69	0.69	0.69	0.69	0.69	0.69	0.69	0.69	0.69	0.69	0.69	0.69	0.69	0.69	0.69	0.69	0.69	0.69	0.69	0.69	0.69	0.69	0.69	0.69	0.69	0.69	0.69	0.69	0.69	0.69	0.69
	Dry beans	Sd	Clivot et al. 2017 after Fan et al. 2016		0.69	0.69	0.69	0.69	0.69	0.69	0.69	0.69	0.69	0.69	0.69	0.69	0.69	0.69	0.69	0.69	0.69	0.69	0.69	0.69	0.69	0.69	0.69	0.69	0.69	0.69	0.69	0.69	0.69	0.69	0.69	0.69	0.69	0.69
	Green beans	Sd	Clivot et al. 2017 after Fan et al. 2016		0.69	0.69	0.69	0.69	0.69	0.69	0.69	0.69	0.69	0.69	0.69	0.69	0.69	0.69	0.69	0.69	0.69	0.69	0.69	0.69	0.69	0.69	0.69	0.69	0.69	0.69	0.69	0.69	0.69	0.69	0.69	0.69	0.69	0.69
	Dry vegetables	Sd	Clivot et al. 2017 after Fan et al. 2016		0.69	0.69	0.69	0.69	0.69	0.69	0.69	0.69	0.69	0.69	0.69	0.69	0.69	0.69	0.69	0.69	0.69	0.69	0.69	0.69	0.69	0.69	0.69	0.69	0.69	0.69	0.69	0.69	0.69	0.69	0.69	0.69	0.69	0.69
	Dry fruits	Sd	Clivot et al. 2017 after Fan et al. 2016		0.69	0.69	0.69	0.69	0.69	0.69	0.69	0.69	0.69	0.69	0.69	0.69	0.69	0.69	0.69	0.69	0.69	0.69	0.69	0.69	0.69	0.69	0.69	0.69	0.69	0.69	0.69	0.69	0.69	0.69	0.69	0.69	0.69	0.69
	Squash and melons	Sd	Clivot et al. 2017 after Fan et al. 2016		0.76	0.76	0.76	0.76	0.76	0.76	0.76	0.76	0.76	0.76	0.76	0.76	0.76	0.76	0.76	0.76	0.76	0.76	0.76	0.76	0.76	0.76	0.76	0.76	0.76	0.76	0.76	0.76	0.76	0.76	0.76	0.76	0.76	0.76
	Cabbage	Sd	Clivot et al. 2017 after Fan et al. 2016		0.76	0.76	0.76	0.76	0.76	0.76	0.76	0.76	0.76	0.76	0.76	0.76	0.76	0.76	0.76	0.76	0.76	0.76	0.76	0.76	0.76	0.76	0.76	0.76	0.76	0.76	0.76	0.76	0.76	0.76	0.76	0.76	0.76	0.76
	Leaves vegetables	Sd	Clivot et al. 2017 after Fan et al. 2016		0.76	0.76	0.76	0.76	0.76	0.76	0.76	0.76	0.76	0.76	0.76	0.76	0.76	0.76	0.76	0.76	0.76	0.76	0.76	0.76	0.76	0.76	0.76	0.76	0.76	0.76	0.76	0.76	0.76	0.76	0.76	0.76	0.76	0.76
	Fruits	Sd	Clivot et al. 2017 after Fan et al. 2016		0.76	0.76	0.76	0.76	0.76	0.76	0.76	0.76	0.76	0.76	0.76	0.76	0.76	0.76	0.76	0.76	0.76	0.76	0.76	0.76	0.76	0.76	0.76	0.76	0.76	0.76	0.76	0.76	0.76	0.76	0.76	0.76	0.76	0.76
	Olives	Sd	Clivot et al. 2017 after Fan et al. 2016		0.76	0.76	0.76	0.76	0.76	0.76	0.76	0.76	0.76	0.76	0.76	0.76	0.76	0.76	0.76	0.76	0.76	0.76	0.76	0.76	0.76	0.76	0.76	0.76	0.76	0.76	0.76	0.76	0.76	0.76	0.76	0.76	0.76	0.76
	Citrus	Sd	Clivot et al. 2017 after Fan et al. 2016		0.76	0.76	0.76	0.76	0.76	0.76	0.76	0.76	0.76	0.76	0.76	0.76	0.76	0.76	0.76	0.76	0.76	0.76	0.76	0.76	0.76	0.76	0.76	0.76	0.76	0.76	0.76	0.76	0.76	0.76	0.76	0.76	0.76	0.76
	Hemp	Sd	Clivot et al. 2017 after Fan et al. 2016		0.76	0.76	0.76	0.76	0.76	0.76	0.76	0.76	0.76	0.76	0.76	0.76	0.76	0.76	0.76	0.76	0.76	0.76	0.76	0.76	0.76	0.76	0.76	0.76	0.76	0.76	0.76	0.76	0.76	0.76	0.76	0.76	0.76	0.76
	Flax	Sd	Clivot et al. 2017 after Fan et al. 2016		0.76	0.76	0.76	0.76	0.76	0.76	0.76	0.76	0.76	0.76	0.76	0.76	0.76	0.76	0.76	0.76	0.76	0.76	0.76	0.76	0.76	0.76	0.76	0.76	0.76	0.76	0.76	0.76	0.76	0.76	0.76	0.76	0.76	0.76
	Forage maize	Sd	Clivot et al. 2017 after Fan et al. 2016		0.77	0.77	0.77	0.77	0.77	0.77	0.77	0.77	0.77	0.77	0.77	0.77	0.77	0.77	0.77	0.77	0.77	0.77	0.77	0.77	0.77	0.77	0.77	0.77	0.77	0.77	0.77	0.77	0.77	0.77	0.77	0.77	0.77	0.77
	Forage cabbages	Sd	Clivot et al. 2017 after Fan et al. 2016		0.76	0.76	0.76	0.76	0.76	0.76	0.76	0.76	0.76	0.76	0.76	0.76	0.76	0.76	0.76	0.76	0.76	0.76	0.76	0.76	0.76	0.76	0.76	0.76	0.76	0.76	0.76	0.76	0.76	0.76	0.76	0.76	0.76	0.76
	Alfalfa and clover	Sd	Clivot et al. 2017 after Fan et al. 2016		0.71	0.71	0.71	0.71	0.71	0.71	0.71	0.71	0.71	0.71	0.71	0.71	0.71	0.71	0.71	0.71	0.71	0.71	0.71	0.71	0.71	0.71	0.71	0.71	0.71	0.71	0.71	0.71	0.71	0.71	0.71	0.71	0.71	0.71
	Non-legume temporary meadow	Sd	Clivot et al. 2017 after Fan et al. 2016		0.76	0.76	0.76	0.76	0.76	0.76	0.76	0.76	0.76	0.76	0.76	0.76	0.76	0.76	0.76	0.76	0.76	0.76	0.76	0.76	0.76	0.76	0.76	0.76	0.76	0.76	0.76	0.76	0.76	0.76	0.76	0.76	0.76	0.76
	Natural meadow	Sd	Clivot et al. 2017 after Fan et al. 2016		0.74	0.74	0.74	0.74	0.74	0.74	0.74	0.74	0.74	0.74	0.74	0.74	0.74	0.74	0.74	0.74	0.74	0.74	0.74	0.74	0.74	0.74	0.74	0.74	0.74	0.74	0.74	0.74	0.74	0.74	0.74	0.74	0.74	0.74
	Weed	Sd	Clivot et al. 2017 after Fan et al. 2016		0.74	0.74	0.74	0.74	0.74	0.74	0.74	0.74	0.74	0.74	0.74	0.74	0.74	0.74	0.74	0.74	0.74	0.74	0.74	0.74	0.74	0.74	0.74	0.74	0.74	0.74	0.74	0.74	0.74	0.74	0.74	0.74	0.74	0.74
	Harvested crop
	Harvested wheat	ktonC/yr			887.561	671.711	496.95	2300.42	770.675	296.8	177.629	1214.93	1303.6	558.053	659.555	162.883	702.315	681.833	1271.26	2387.2	746.999	69.011	8.9164	95.0772	70.1455	145.541	24.9007	1652.1	18.1022	38.6836	5.11043	103.964	20.8818	65.4861	136.915	102.533	9.52414	17857.3
	Harvested rye	ktonC/yr			2.16709	0.221749	5.25209	1.99808	1.12687	0.0997409	0.0348627	0.479415	1.11755	2.65735	2.32151	0.375043	0.739986	1.06746	3.60366	13.4538	14.9908	1.89721	0.147194	0.989939	0.917129	2.20346	2.83866	1.08606	0.149693	0.111417	0.129778	0.445026	2.4907	0.206501	0.219105	0.0416411	1.39668	66.9773
	Harvested barley	ktonC/yr			280.267	133.566	146.935	426.478	143.149	70.8139	24.8561	257.519	766.834	401.297	426.196	16.133	155.966	130.717	167.864	728.915	259.773	34.754	5.06211	25.9799	26.2319	45.6892	51.6864	224.753	3.08362	8.77142	0.962776	44.7199	6.30738	3.64938	6.28593	7.24982	0.761429	5033.23
	Harvested oat	ktonC/yr			8.95103	3.21849	2.34286	11.4005	22.9762	1.68214	1.72984	8.99227	10.7651	9.56682	8.29466	1.43338	18.8616	4.522	16.6755	25.1758	20.3033	1.60516	0.14583	1.68482	3.15242	2.09899	3.25158	13.9631	0.664542	0.736213	0.169066	3.80921	1.005	0.228411	0.632647	0.613594	1.04797	211.7
	Harvested grain maize	ktonC/yr			195.254	33.1966	78.8813	220.268	54.3882	11.4128	42.9959	110.061	178.441	71.2504	102.3	771.143	389.61	521.601	450.499	712.041	386.961	59.3573	23.1277	194.299	20.378	210.311	4.00166	1124.44	164.123	816.901	365.633	151.966	10.8122	10.3442	30.1438	4.91307	1.71617	7522.78
	Harvested rice	ktonC/yr			0	0	0	0	0	0	0	0	0	0	0	0	0	0	0	0	0	0	0	0	0	0	0	0.779138	0	0	0	0	0	40.953	196.771	15.4962	0	254
	Harvested other cereals	ktonC/yr			6.02209	2.56683	3.32058	6.60376	27.6761	2.33137	10.4828	8.10226	12.1627	24.5528	32.9774	7.11457	117.407	41.1916	151.008	129.57	243.767	10.3593	2.52678	15.3822	13.7254	28.7705	43.7691	182.599	3.69208	19.8048	3.16758	43.4768	27.651	3.3194	10.3961	5.64326	3.14734	1244.29
	Harvested straw	ktonC/yr			59.0046	133.795	33.5539	462.382	536.071	131.961	133.557	482.257	371.148	353.642	450.171	63.5489	711.514	394.186	900.214	678.419	660.271	69.2753	13.6485	69.3616	49.047	97.9837	100.614	490.485	11.4256	41.0693	5.53202	99.8428	43.0043	6.74475	29.6432	22.8889	10.3878	7716.65
	Harvested rapeseed	ktonC/yr			123.506	136.659	101.278	175.782	74.6206	24.6745	17.9593	108.564	231.824	183.087	159.681	17.1667	37.5492	55.3801	158.727	359.812	80.2884	8.28805	1.64244	7.43985	6.81965	9.02986	9.4897	76.8521	1.34777	3.08006	0.860909	5.8232	0.238503	1.14307	4.44783	1.32781	0	2184.39
	Harvested sunflower	ktonC/yr			4.72624	0.453238	0.777444	1.22793	1.5033	0.0249824	0	6.9254	19.7497	16.1397	5.42419	0.617078	13.2511	86.304	67.8715	124.297	28.5946	2.85266	0.992999	4.25866	9.18725	11.8505	34.4868	317.843	4.58015	3.53471	3.12154	16.6863	0.858405	5.33161	17.8561	3.27369	0.0372945	814.639
	Harvested soybean	ktonC/yr			0.054578	0.00879519	0.00801215	0.0144653	0	0	0	0.0307707	0.704851	4.37609	1.32023	1.47168	0.028168	0.213935	0.252961	1.48768	5.27355	2.51512	0.465862	1.76149	1.46114	1.86323	2.79861	46.8488	0.547636	1.88544	0.486697	0.70727	0.0117948	0.0571295	0.317192	0.0186899	0	76.9918
	Harvested other oil crops	ktonC/yr			0.560121	0.763972	0.604179	1.38592	0.20913	0.0333519	0.0140204	0.260354	1.04143	2.23389	0.297563	0.129323	0.955438	1.13721	2.08306	3.13604	0.428207	0.00929583	0	0.00903693	0.0481913	0.00783481	0.185178	0.605904	0.0404224	0.0202491	0.0224079	0.0568342	0.0076055	0.0158043	0.0462823	0.00319119	0.00372945	16.3552
	Harvested horse beans and faba beans	ktonC/yr			36.8746	8.79291	1.12675	51.506	9.9574	5.09768	0.518572	15.1892	10.9995	1.39396	1.82342	0.0769215	1.80853	1.57501	4.07155	5.73083	1.1751	0.195533	0.00334284	0.056239	0.224445	0.0996739	0.0126519	8.89082	0.150843	0.347185	0.0456894	0.539832	0.00993389	0.108824	0.130485	0.0438399	0.0152907	168.593
	Harvested peas	ktonC/yr			45.9407	30.5219	20.7164	79.117	26.843	5.99081	0.794472	17.9641	50.4997	9.6412	7.26395	0.245081	6.48041	15.9345	20.8895	39.1312	6.67219	0.186784	0.0820303	0.785494	2.59847	2.87342	0.130509	22.1652	0.280728	0.313684	0.151237	0.493346	0.044725	0.550923	1.61683	0.731308	0.140787	417.792
	Harvested other protein crops	ktonC/yr			0.173086	0.0687124	0.176392	0.0670613	0.130975	0.0257481	0.0512719	0.00280584	0.016135	0.0136729	0.0486161	0.023444	0.593085	0.484719	1.66847	1.41537	0.340606	0.0307089	0.0024251	0.0664919	0.0041487	0.0547887	0.0118337	0.223117	0.0241349	0.215601	0.0133554	0.132389	0.00660761	0	0	0.000924277	0	6.08669
	Harvested sugar beet	ktonC/yr			374.509	110.042	46.0916	1325.41	96.655	68.2243	0.386713	556.121	633.793	12.9437	0.646469	63.5014	0.221785	0.129391	4.28391	190.229	48.4218	2.06045	0	0	0	0	0	0.31318	0.0273365	0	0.147751	0.197054	0	0	0	0	0	3534.35
	Harvested potatoes	ktonC/yr			19.9262	16.442	23.9505	237.497	5.10885	28.7895	2.18147	259.595	71.5118	3.03802	1.39076	6.14092	23.5047	2.52795	1.54796	21.2213	4.42576	0.14897	0.613413	1.6498	1.55122	1.41524	0.445062	4.97354	2.07299	0.198224	1.07411	0.293206	0.258011	2.12939	6.92647	2.12541	5.34297	760.018
	Harvested other roots	ktonC/yr			2.16997e-11	2.58682e-11	1.22416e-11	1.95722e-11	2.3498e-11	1.23388e-11	2.53179e-11	2.20066e-11	1.42724e-11	2.10962e-11	1.47792e-11	2.05906e-11	1.28945e-11	1.47622e-11	1.74326e-11	1.94301e-11	2.12321e-11	1.39761e-11	1.11885e-11	1.30051e-11	3.90466e-11	1.61709e-11	1.39499e-11	2.73214e-11	2.08167e-11	2.77651e-11	1.18137e-11	2.08461e-11	2.11528e-11	2.10331e-11	1.23749e-10	2.28923e-11	1.46253e-10	8.70014e-10
	Harvested green peas	ktonC/yr			0.0313105	0.00387247	0.218728	2.93293	0.0023874	0.000663829	0.00442177	6.32472	0.0228202	0.0683073	0.00136042	0.00278282	2.37175	0.0757022	0.0210499	0.106584	0.109884	0.0781479	0.000550473	0.00799034	0.00107769	0.00951578	0.000116482	0.196371	0.0392614	0.0602184	0.155282	0.00670723	0.000453728	0.00890645	0.0480519	0.0159239	0.00917005	12.937
	Harvested dry beans	ktonC/yr			0.685997	0.0569928	0.862581	4.31333	0.00570237	0.00536461	0.0111044	2.5846	0.163528	0.0453673	0.00148235	0.00504059	5.9685	0.271003	0.206596	0.257429	0.176213	0.11572	0	0.00415644	0.00313642	0.0256006	0	0.157778	0.246967	0.480468	0.0843999	0.0103657	0.00275991	0.069823	0.277326	0.046282	0.0305815	17.1762
	Harvested green beans	ktonC/yr			0.323473	0.0163681	0.284515	3.07847	0.00828421	0.00567524	0.025309	3.65925	0.00592949	0.141116	0.00682355	0.0176493	3.97638	0.154985	0.323247	0.228256	0.205475	0.141623	0.0105608	0.0412392	0.00884991	0.0194714	0.00121923	0.673523	1.47408	0.847793	1.46138	0.0470246	0.00560655	0.0651405	0.319082	0.0361802	0.0372945	17.6513
	Harvested dry vegetables	ktonC/yr			0.098993	0.0104003	0.143282	0.0739571	0	0	0.000430404	0.743033	1.44024	0.10707	0.019905	0.000787592	0	1.00408	0.243159	2.94281	1.97343	0	0	0.00043112	0.0606042	0.0639843	0.0129483	2.37328	0.00317611	0.132988	0.016654	0.0124832	0.0238773	0.0090642	0	1.36708	0.0236198	12.9018
	Harvested dry fruits	ktonC/yr			0.046739	0.0107631	0	0.000449183	0.0259653	0	0.00316347	0.000476993	0.0278238	0	0.0121854	0.0156293	0.00360594	0.752372	0.234194	0.231301	0.191247	0.00368863	0.0351497	0.00899824	0.178411	8.92576	0.181887	4.93358	0.237439	0.19639	0.0257467	6.7465	0.959794	0.152643	0.32345	0.339414	0.331113	25.1359
	Harvested squash and melons	ktonC/yr			0.700343	0.102496	0.0348171	0.121251	0.051124	0.129368	0.14274	1.59084	0.8958	0.222712	0.84987	0.333661	1.07151	2.29737	4.74818	6.17885	0.292929	0.0179809	0.126902	0.541966	3.0726	1.46647	0.00474263	12.0291	0.413892	0.362424	0.0823215	1.08045	0.0499957	13.3734	24.6916	7.69969	9.48118	94.2586
	Harvested cabbage	ktonC/yr			0.448627	0.0941021	0.0244784	0.071147	0.171524	0.101215	2.35376	4.99396	0.614958	0.132904	0.028376	3.33607	12.349	0.21678	0.63213	0.286809	0.123085	0.0189515	0.0301004	0.29057	0.0309503	0.139481	0.00453513	0.700869	0.0183812	0.15922	0.0203018	0.0142691	0.0058551	0.575567	2.9723	0.0794627	0.182545	31.2223
	Harvested leaves vegetables	ktonC/yr			2.67281	0.264412	0.124297	12.4672	0.749849	0.278281	3.72116	26.9737	1.07031	0.361966	0.0878844	0.547717	5.72185	0.646573	4.73883	2.26179	0.825666	0.0291813	0.158152	1.83748	0.723627	0.632242	0.0229986	3.19454	0.482947	0.304768	0.162929	0.165883	0.0409857	6.79068	26.5742	1.78823	23.6522	130.075
	Harvested fruits	ktonC/yr			1.50517	3.36958	0.473099	4.8506	9.99704	1.2241	2.68907	2.12327	0.95701	0.191709	1.54705	2.24664	3.67593	2.47148	29.4718	11.6222	5.49193	0.0495434	1.28448	2.23718	30.2927	16.4229	0.116979	71.9443	2.39338	1.83989	0.900246	9.83707	5.95791	41.9299	115.802	21.0681	73.3176	479.302
	Harvested olives	ktonC/yr			0	0	0	0	0	0	0	0	0	0	0	0	0	0.00010961	0	0	0	0	0	0	0.310025	0.153305	0	0.116682	0	0	0	0	0	1.03794	5.79432	0.713023	0.436565	8.56197
	Harvested citrus	ktonC/yr			0	0	0	0	0	0	0	0	0	0	0	0	0	0	0	0	0	0	0	0	0	0	0	0	0	0	0	0	0	0	0.126354	0	0	0.126354
	Harvested hemp	ktonC/yr			1.09637	0.56727	0.0225629	0	0.243098	0.00247085	0	0	10.029	0.890271	1.62059	0.0185316	0.193703	0.365648	3.97959	0.364176	0.0589986	0.403376	0	0	0	0.0266578	0.00871	3.26859	0	0.482124	0	0.145167	0.00499735	0	0	0.0252903	0	23.8172
	Harvested flax	ktonC/yr			5.34596	54.8032	0.612384	28.6471	22.8981	43.2162	0.00763334	39.9171	0.90746	0.0117084	0.0332531	0	0.00880532	0	0	0.0767903	0	0	0	0	0	0	0.00627748	0.129094	0	0	0	0.00347087	0	0	0	0	0	196.625
	Harvested forage maize	ktonC/yr			5.39662	29.0543	4.21564	122.855	254.497	61.1966	262.952	200.017	44.0368	50.0728	140.709	34.6562	479.779	141.894	468.199	70.9485	180.054	13.926	4.06468	31.0647	4.8596	22.6848	23.4849	109.065	8.7666	106.484	9.87324	45.5998	20.6568	1.94151	10.238	0.737072	2.11378	2966.1
	Harvested cabbages	ktonC/yr			0.640768	0.50782	0.278727	1.32847	1.00858	0.25605	0.582011	0.923666	1.20313	0.826872	1.05894	0.349616	1.10716	0.966888	1.94857	2.38243	3.18461	0.326884	0.148562	0.271651	0.807577	0.539341	0.542144	2.86431	0.284271	0.921621	0.129173	0.635686	0.634142	0.293428	1.38165	0.43862	0.980413	29.7538
	Harvested alfalfa and clover	ktonC/yr			11.2737	22.0519	2.39729	33.3669	10.974	1.58948	8.28936	8.7889	307.169	46.5594	29.0566	7.54953	15.366	52.1953	69.8119	72.7373	93.5934	6.59618	4.10879	11.8512	113.996	64.2797	42.9723	244.443	3.98944	14.232	0.442001	54.3062	5.49842	20.8391	94.5922	17.8403	9.95006	1502.71
	Harvested non-legume temporary meadow	ktonC/yr			16.7684	39.938	11.1527	62.4671	279.86	60.3143	431.063	76.0532	58.95	98.0493	178.427	50.0605	1442.89	698.58	1879.42	841.777	1996.25	170.148	45.9469	131.997	123.364	94.2704	603.398	1002.37	25.4461	580.727	33.2729	407.788	393.36	12.4398	35.6137	20.6252	5.75317	11908.5
	Harvested natural meadow	ktonC/yr			0	6.59972e-09	0	0	792.858	393.564	539.319	0	0	0	1690.61	0	379.798	652.222	1037.25	0	4541.86	807.199	415.229	538.411	414.203	512.681	730.092	992.825	0	571.267	0	547.249	1051.32	0	0	0	0	16608
	Total harvested crop prod	ktonC/yr			2092.53	1432.88	982.81	5578.13	2351.58	816.281	1125.03	3421.69	4091.7	1851.57	2213.17	1211.14	4155.28	2840.7	5686.5	6433.64	4791.22	454.402	113.292	598.956	483.201	769.452	949.38	5627.39	254.109	1642.9	433.255	999.552	540.789	239.795	761.102	239.724	159.821	65343
	Permanent grassland prod	ktonC/yr			0	6.59972e-09	0	0	792.858	393.564	539.319	0	0	0	1690.61	0	379.798	652.222	1037.25	0	4541.86	807.199	415.229	538.411	414.203	512.681	730.092	992.825	0	571.267	0	547.249	1051.32	0	0	0	0	16608
	Net Priamary production
	Cereals	ktonC/yr			3597.24	2106.79	2036.29	7485.43	2541.16	1062.96	559.389	3923.44	6103.61	2889.07	3326.56	2410.58	3594.17	3778.71	5736.2	10437.2	4549.18	475.813	96.1205	916.534	316.181	1153.49	318.686	8547.93	521.284	2191.71	1038.71	879.941	169.939	335.622	891.05	394.599	44.9836	84430.6
	Rapeseed	ktonC/yr			618.267	684.485	527.088	873.229	379.957	128.584	90.1417	544.53	1167.86	926.565	815.37	85.1328	192.228	279.217	799.57	1846.55	401.941	41.5138	8.01379	37.4948	33.8975	45.861	48.7558	381.506	6.98163	15.1256	4.40564	29.1951	1.22207	6.37068	21.8762	7.23054	0	11050.2
	Sunflower	ktonC/yr			14.5379	1.38792	2.40309	3.76022	4.60268	0.0764309	0	21.1339	61.0688	49.889	16.707	1.89155	40.604	266.127	209.203	382.863	88.1688	8.7663	3.02817	13.0727	28.2506	36.5753	106.159	975.159	14.129	10.8308	9.63802	51.2838	2.63463	16.7522	54.619	10.2476	0.115611	2505.69
	Soybean	ktonC/yr			0.169948	0.0274064	0.0252863	0.0452965	0	0	0	0.0964006	2.22817	13.8662	4.19975	4.62877	0.0870329	0.675299	0.795655	4.69515	16.6875	7.92009	1.4563	5.56997	4.58994	5.91662	8.89134	147.059	1.74175	5.91551	1.55261	2.23035	0.0366294	0.185925	0.991489	0.0604058	0	242.345
	Other oil crops	ktonC/yr			1.95637	2.66635	2.11964	4.83264	0.726176	0.116556	0.0486388	0.905126	3.66081	7.80428	1.04279	0.447318	3.46446	4.04848	7.42678	10.9761	1.52422	0.0341027	0	0.0312884	0.167266	0.0276464	0.641405	2.10653	0.140805	0.0703969	0.0779848	0.198329	0.0263143	0.0551047	0.160776	0.0110987	0.0129067	57.5287
	Horse beans and faba beans	ktonC/yr			74.8849	17.8375	2.35433	103.646	20.3085	10.8191	1.05689	31.0418	22.5765	2.82059	3.81097	0.154164	3.7278	3.54996	8.25899	11.5667	2.39588	0.410182	0.00653177	0.113243	0.445884	0.201413	0.0255909	17.4652	0.306852	0.677377	0.0930096	1.0793	0.0202205	0.237334	0.258493	0.095691	0.033179	342.28
	Peas	ktonC/yr			87.7213	58.6542	42.1675	151.568	52.2723	12.3561	1.52332	34.8312	100.325	18.909	14.5041	0.464371	13.1315	31.0451	40.3832	76.3415	12.7619	0.356509	0.15183	1.52275	4.80822	6.00584	0.248646	41.4099	0.578077	0.753768	0.320449	1.25524	0.0876363	1.17927	2.95581	1.63423	0.29785	812.526
	Other protein crops	ktonC/yr			0.334889	0.140699	0.36452	0.129592	0.256625	0.0567074	0.100396	0.00543676	0.0322984	0.0273507	0.0995638	0.0455014	1.22999	0.977102	3.31184	2.84836	0.671375	0.0608286	0.00464894	0.133357	0.00805486	0.10804	0.0228128	0.426127	0.0493435	0.414418	0.0271414	0.263769	0.0133496	0	0	0.00199607	0	12.1661
	Sugar beet	ktonC/yr			506.769	147.999	64.0466	1784.5	130.075	97.0976	0.523879	756.171	884.177	17.8898	0.892316	85.4003	0.305306	0.176185	5.81763	262.335	65.881	2.81437	0	0	0	0	0	0.421703	0.0391584	0	0.210769	0.272811	0	0	0	0	0	4813.82
	Potatoes	ktonC/yr			23.6729	19.5212	28.5365	282.169	6.06704	34.306	2.58974	308.56	85.225	3.61156	1.65571	7.29156	27.9586	3.00018	1.83831	25.2247	5.25681	0.176879	0.72686	1.959	1.84087	1.68077	0.529244	5.89598	2.46697	0.234944	1.27795	0.34812	0.306915	2.55168	8.21637	2.5389	6.4146	903.651
	Other roots	ktonC/yr			2.79644e-11	3.37563e-11	1.63668e-11	2.54828e-11	3.02761e-11	1.61772e-11	3.37293e-11	2.83597e-11	1.83825e-11	2.72268e-11	1.94045e-11	2.67891e-11	1.70999e-11	1.9759e-11	2.24825e-11	2.52046e-11	2.72275e-11	1.77442e-11	1.4104e-11	1.70413e-11	4.93045e-11	2.09895e-11	1.80767e-11	3.43774e-11	2.70992e-11	3.5017e-11	1.51918e-11	2.6779e-11	2.71925e-11	3.24916e-11	1.55396e-10	3.33198e-11	2.07501e-10	1.14731e-09
	Green peas	ktonC/yr			0.0575388	0.00710997	0.40257	5.38119	0.00440766	0.00127557	0.00823853	11.6168	0.042523	0.126764	0.00253259	0.00512088	4.50705	0.139682	0.0388348	0.196258	0.203053	0.143223	0.00100781	0.0149337	0.0019872	0.0177543	0.000214345	0.359602	0.0738203	0.1111	0.293443	0.0123219	0.000858475	0.0173564	0.0882934	0.0312175	0.017295	23.9253
	Dry beans	ktonC/yr			1.29038	0.106094	1.66965	8.19552	0.0107389	0.0102976	0.0213106	4.89117	0.311487	0.085982	0.00283092	0.00937878	11.5536	0.511384	0.388137	0.489549	0.338377	0.221687	0	0.00798065	0.00583327	0.0487245	0	0.295085	0.473497	0.887467	0.159175	0.0193618	0.00539953	0.138444	0.517737	0.100099	0.0669715	32.8333
	Green beans	ktonC/yr			0.604713	0.0304076	0.539065	5.76417	0.0154345	0.0107181	0.0472894	6.83406	0.0111187	0.27079	0.0130933	0.0331311	7.63541	0.2892	0.602033	0.42669	0.387357	0.266264	0.0197491	0.0775718	0.0164384	0.0368997	0.00227892	1.26297	2.8096	1.5843	2.81145	0.0888526	0.0106201	0.130436	0.596237	0.0707636	0.0732456	33.3724
	Dry vegetables	ktonC/yr			0.191805	0.0198507	0.279292	0.140799	0	0	0.000817361	1.44926	2.77297	0.203535	0.0391052	0.00148301	0	1.92446	0.466384	5.67794	3.69525	0	0	0.000834524	0.114273	0.122147	0.0249753	4.44577	0.0062089	0.248361	0.0336787	0.0236173	0.0452171	0.018247	0	2.78887	0.0472276	24.7824
	Dry fruits	ktonC/yr			0.0876036	0.0201021	0	0.000835961	0.0491524	0	0.00589931	0.000887075	0.0528543	0	0.0233646	0.0291593	0.0066846	1.44581	0.439745	0.437602	0.359878	0.00698929	0.0652916	0.0169327	0.329217	16.9199	0.337534	9.2736	0.455039	0.365483	0.050364	12.698	1.82429	0.324332	0.597663	0.639526	0.625079	47.4888
	Squash and melons	ktonC/yr			0.840299	0.122979	0.0417749	0.145482	0.0613406	0.155221	0.171265	1.90875	1.07482	0.267219	1.01971	0.40034	1.28564	2.75648	5.69705	7.41363	0.351468	0.0215742	0.152262	0.650272	3.68663	1.75953	0.0056904	14.433	0.496604	0.434851	0.0987726	1.29636	0.0599869	16.046	29.626	9.23839	11.3759	113.095
	Cabbage	ktonC/yr			0.987916	0.206164	0.0642776	0.178852	0.442274	0.296739	6.36313	11.3086	1.46673	0.269206	0.0925206	8.61975	37.7886	0.493497	1.48577	0.64656	0.228289	0.0449144	0.0573573	0.573844	0.0559113	0.287042	0.00969089	1.15627	0.0428053	0.255829	0.0485964	0.031274	0.0139054	2.00205	5.18764	0.39955	0.461783	81.5674
	Leaves vegetables	ktonC/yr			3.64593	0.357359	0.179646	17.9175	1.05855	0.406274	5.07269	38.5258	1.48875	0.50576	0.121732	0.713962	7.91911	0.868376	6.34675	2.95809	1.12681	0.0414218	0.205259	2.52852	0.964833	0.834562	0.0307338	4.20251	0.657855	0.40663	0.211463	0.211295	0.0591705	11.126	34.9485	2.66159	40.0516	188.355
	Fruits	ktonC/yr			1.87255	4.2638	0.621187	6.21543	12.7787	1.58729	3.43428	2.75093	1.23233	0.246555	1.9268	2.83508	4.72543	3.21192	39.2051	15.2118	7.00637	0.062909	1.60503	2.80208	39.2097	21.0337	0.146492	91.3727	3.12271	2.31582	1.17581	12.7958	8.08623	62.2666	148.718	29.8391	118.387	652.065
	Olives	ktonC/yr			0	0	0	0	0	0	0	0	0	0	0	0	0	0.000131514	0	0	0	0	0	0	0.383003	0.193256	0	0.14567	0	0	0	0	0	1.40701	7.21509	0.997658	0.580387	10.9222
	Citrus	ktonC/yr			0	0	0	0	0	0	0	0	0	0	0	0	0	0	0	0	0	0	0	0	0	0	0	0	0	0	0	0	0	0	0.158996	0	0	0.158996
	Hemp	ktonC/yr			1.33569	0.690098	0.0276888	0	0.295982	0.00304117	0	0	12.2745	1.08703	1.98357	0.0225206	0.236782	0.446473	4.85183	0.444472	0.0718707	0.491375	0	0	0	0.0325031	0.0106218	3.96774	0	0.58385	0	0.176667	0.00608659	0	0	0.0316558	0	29.0721
	Flax	ktonC/yr			6.51291	66.6694	0.751507	34.8737	27.8794	53.1915	0.0092878	48.6458	1.11065	0.014296	0.0407011	0	0.0107636	0	0	0.0937215	0	0	0	0	0	0	0.00765535	0.156707	0	0	0	0.00422404	0	0	0	0	0	239.972
	Forage maize	ktonC/yr			13.9921	70.0619	11.6306	303.094	610.789	165.554	514.592	471.745	118.234	138.133	387.356	87.9686	1260.8	389.395	1294.53	187.517	494.85	38.0822	9.85771	87.2768	10.1294	61.4111	60.5828	286.277	25.0463	269.519	28.6026	115.702	50.953	5.78465	24.7089	2.21286	5.45075	7601.83
	Fodder cabbages	ktonC/yr			0.98299	0.777136	0.466966	2.17602	1.67379	0.45508	0.990106	1.43618	1.91908	1.21984	1.99811	0.580824	2.0151	1.50726	3.08561	3.69632	4.5167	0.519759	0.21322	0.396162	1.1324	0.801477	0.819904	3.86674	0.448098	1.23095	0.206412	0.972998	1.00936	0.574978	1.90921	1.08607	1.6111	46.296
	Alfalfa and clover	ktonC/yr			17.6939	34.3647	3.94659	51.9831	17.2234	2.92717	13.317	13.8936	526.346	75.5215	50.7825	11.8188	26.4485	85.855	113.023	113.908	149.889	10.3589	5.75036	19.2904	173.336	107.149	71.9082	356.993	7.12063	21.303	0.829347	88.3954	9.39967	48.7569	139.326	37.5914	22.4667	2428.92
	Non-legume temporary meadow	ktonC/yr			23.7138	56.118	16.5842	89.0321	402.417	98.6123	639.672	109.059	84.8699	141.627	269.188	69.4324	2373.56	1045.88	2801.6	1208.64	2856.12	244.179	60.728	197.656	169.198	139.783	898.085	1368.61	38.6915	831.259	54.779	577.685	609.015	22.2807	47.2797	30.5345	9.95914	17585.8
	Natural meadow	ktonC/yr			0	1.33986e-08	0	0	1081.94	530.464	760.18	0	0	0	2287.51	0	560.44	894.208	1500.93	0	6266.86	1136.45	594.298	758.155	551.377	725.373	1043.34	1351.42	0	816.445	0	762.191	1499.97	0	0	0	0	23121.6
	Weeds	ktonC/yr			0.101113	0.0638516	0.047343	0.254119	0.0902269	0.0341365	0.0491595	0.146532	0.170669	0.0725683	0.0866971	0.0570022	0.17142	0.119716	0.235824	0.284124	0.201868	0.0189265	0.00477672	0.0258872	0.0159924	0.0303518	0.0402897	0.244617	0.0119347	0.0793801	0.0213641	0.0422701	0.0246143	0.0105587	0.0315473	0.0099141	0.00695232	2.80575
	Total NPP of cropland	ktonC/yr			4999.46	3273.38	2742.65	11214.7	4210.22	1669.62	1839.13	6344.93	9184.14	4290.11	4899.52	2778.57	7615.57	5902.37	11084.8	14608.7	8663.81	832.325	188.169	1287.75	788.77	1600.33	1515.97	12266.4	627.174	3356.31	1145.64	1776.22	854.8	533.839	1421.04	534.652	263.039	134314
	Total NPP of permanent grassland	ktonC/yr			0	1.33986e-08	0	0	1081.94	530.464	760.18	0	0	0	2287.51	0	560.44	894.208	1500.93	0	6266.86	1136.45	594.298	758.155	551.377	725.373	1043.34	1351.42	0	816.445	0	762.191	1499.97	0	0	0	0	23121.6
	Fan coefficient : intercept a for calculating Harvest Index
	Wheat	sd	Fan et al. 2017		0.344	0.344	0.344	0.344	0.344	0.344	0.344	0.344	0.344	0.344	0.344	0.344	0.344	0.344	0.344	0.344	0.344	0.344	0.344	0.344	0.344	0.344	0.344	0.344	0.344	0.344	0.344	0.344	0.344	0.344	0.344	0.344	0.344	0.344
	Ry	sd	Fan et al. 2017		0.344	0.344	0.344	0.344	0.344	0.344	0.344	0.344	0.344	0.344	0.344	0.344	0.344	0.344	0.344	0.344	0.344	0.344	0.344	0.344	0.344	0.344	0.344	0.344	0.344	0.344	0.344	0.344	0.344	0.344	0.344	0.344	0.344	0.344
	barley	sd	Fan et al. 2017		0.378	0.378	0.378	0.378	0.378	0.378	0.378	0.378	0.378	0.378	0.378	0.378	0.378	0.378	0.378	0.378	0.378	0.378	0.378	0.378	0.378	0.378	0.378	0.378	0.378	0.378	0.378	0.378	0.378	0.378	0.378	0.378	0.378	0.378
	oat	sd	Fan et al. 2017		0.357	0.357	0.357	0.357	0.357	0.357	0.357	0.357	0.357	0.357	0.357	0.357	0.357	0.357	0.357	0.357	0.357	0.357	0.357	0.357	0.357	0.357	0.357	0.357	0.357	0.357	0.357	0.357	0.357	0.357	0.357	0.357	0.357	0.357
	grain maize	sd	Fan et al. 2017		0.369	0.369	0.369	0.369	0.369	0.369	0.369	0.369	0.369	0.369	0.369	0.369	0.369	0.369	0.369	0.369	0.369	0.369	0.369	0.369	0.369	0.369	0.369	0.369	0.369	0.369	0.369	0.369	0.369	0.369	0.369	0.369	0.369	0.369
	other cereals	sd	Fan et al. 2017		0.38	0.38	0.38	0.38	0.38	0.38	0.38	0.38	0.38	0.38	0.38	0.38	0.38	0.38	0.38	0.38	0.38	0.38	0.38	0.38	0.38	0.38	0.38	0.38	0.38	0.38	0.38	0.38	0.38	0.38	0.38	0.38	0.38	0.38
	Fan coefficient : slope b for calculating Harvest Index
	Wheat	sd	Fan et al. 2017		0.015	0.015	0.015	0.015	0.015	0.015	0.015	0.015	0.015	0.015	0.015	0.015	0.015	0.015	0.015	0.015	0.015	0.015	0.015	0.015	0.015	0.015	0.015	0.015	0.015	0.015	0.015	0.015	0.015	0.015	0.015	0.015	0.015	0.015
	Ry	sd	Fan et al. 2017		0.015	0.015	0.015	0.015	0.015	0.015	0.015	0.015	0.015	0.015	0.015	0.015	0.015	0.015	0.015	0.015	0.015	0.015	0.015	0.015	0.015	0.015	0.015	0.015	0.015	0.015	0.015	0.015	0.015	0.015	0.015	0.015	0.015	0.015
	barley	sd	Fan et al. 2017		0.028	0.028	0.028	0.028	0.028	0.028	0.028	0.028	0.028	0.028	0.028	0.028	0.028	0.028	0.028	0.028	0.028	0.028	0.028	0.028	0.028	0.028	0.028	0.028	0.028	0.028	0.028	0.028	0.028	0.028	0.028	0.028	0.028	0.028
	oat	sd	Fan et al. 2017		0.029	0.029	0.029	0.029	0.029	0.029	0.029	0.029	0.029	0.029	0.029	0.029	0.029	0.029	0.029	0.029	0.029	0.029	0.029	0.029	0.029	0.029	0.029	0.029	0.029	0.029	0.029	0.029	0.029	0.029	0.029	0.029	0.029	0.029
	grain maize	sd	Fan et al. 2017		0.015	0.015	0.015	0.015	0.015	0.015	0.015	0.015	0.015	0.015	0.015	0.015	0.015	0.015	0.015	0.015	0.015	0.015	0.015	0.015	0.015	0.015	0.015	0.015	0.015	0.015	0.015	0.015	0.015	0.015	0.015	0.015	0.015	0.015
	other cereals	sd	Fan et al. 2017		0.015	0.015	0.015	0.015	0.015	0.015	0.015	0.015	0.015	0.015	0.015	0.015	0.015	0.015	0.015	0.015	0.015	0.015	0.015	0.015	0.015	0.015	0.015	0.015	0.015	0.015	0.015	0.015	0.015	0.015	0.015	0.015	0.015	0.015
	Harvest Index
	Harvested Index wheat	sd	Calculated following Fan method		0.379507	0.398963	0.364342	0.397051	0.403332	0.368945	0.456371	0.40389	0.368809	0.362931	0.366614	0.376131	0.386117	0.363633	0.360725	0.38347	0.362017	0.365024	0.391067	0.356863	0.402995	0.368755	0.382107	0.367661	0.354121	0.377029	0.352599	0.380226	0.393926	0.360273	0.368871	0.358327	0.411698	0.378618
	Harvested Index rye	sd	Calculated following Fan method		0.401399	0.425923	0.363714	0.381428	0.405353	0.380104	0.406782	0.408663	0.362884	0.367241	0.364341	0.361967	0.382468	0.375102	0.358389	0.377223	0.357199	0.359019	0.373458	0.3528	0.407639	0.359517	0.370843	0.365345	0.351245	0.517821	0.354044	0.376761	0.390541	0.362214	0.701806	0.357814	0.412591	0.390716
	Harvested Index barley	sd	Calculated following Fan method		0.445356	0.494029	0.414385	0.477191	0.472225	0.42666	0.527207	0.523788	0.419029	0.409108	0.413715	0.433829	0.441308	0.409162	0.401211	0.436294	0.409403	0.411733	0.458101	0.400537	0.482242	0.420876	0.467374	0.410104	0.400287	0.436695	0.388432	0.440891	0.466518	0.393798	0.409751	0.391913	0.430953	0.435276
	Harvested Index oat	sd	Calculated following Fan method		0.429268	0.470322	0.389107	0.418299	0.447242	0.39624	0.53768	0.45377	0.375847	0.374312	0.379144	0.390509	0.4145	0.386879	0.386424	0.404037	0.379023	0.384131	0.397555	0.374263	0.433703	0.388227	0.411663	0.387689	0.382511	0.40962	0.368676	0.405456	0.460879	0.369367	0.379193	0.367931	0.40675	0.404855
	Harvested Index grain maize	sd	Calculated following Fan method		0.412424	0.442665	0.396492	0.43313	0.447754	0.394868	0.542348	0.445338	0.396284	0.393336	0.395476	0.418451	0.411329	0.394338	0.386204	0.408044	0.390016	0.390573	0.429486	0.385903	0.521458	0.403154	0.419652	0.406161	0.387958	0.418258	0.382193	0.423238	0.440758	0.398151	0.44081	0.384175	0.462645	0.418275
	Harvested Index rice	sd	Calculated following Bolinder method		0.493892	0.493892	0.493892	0.493892	0.493892	0.493892	0.493892	0.493892	0.493892	0.493892	0.493892	0.493892	0.493892	0.493892	0.493892	0.493892	0.493892	0.493892	0.493892	0.493892	0.493892	0.493892	0.493892	0.493892	0.493892	0.493892	0.493892	0.493892	0.493892	0.493892	0.493892	0.493892	0.493892	0.493892
	Harvested Index other cereals	sd	Calculated following Fan method		0.410402	0.465103	0.404223	0.42404	0.42594	0.408446	0.503925	0.448065	0.393364	0.395897	0.398763	0.407973	0.418004	0.393296	0.391816	0.403142	0.393184	0.398438	0.435649	0.390184	0.445908	0.401248	0.410982	0.39651	0.390954	0.405463	0.386466	0.41167	0.430349	0.391187	0.406652	0.392852	0.449397	0.413015
	Harvested Index rapeseed	sd	Calculated following Bolinder method		0.212976	0.212976	0.212976	0.212976	0.212976	0.212976	0.212976	0.212976	0.212976	0.212976	0.212976	0.212976	0.212976	0.212976	0.212976	0.212976	0.212976	0.212976	0.212976	0.212976	0.212976	0.212976	0.212976	0.212976	0.212976	0.212976	0.212976	0.212976	0.212976	0.212976	0.212976	0.212976	0.212976	0.212976
	Harvested Index sunflower	sd	Calculated following Bolinder method		0.328835	0.328835	0.328835	0.328835	0.328835	0.328835	0.328835	0.328835	0.328835	0.328835	0.328835	0.328835	0.328835	0.328835	0.328835	0.328835	0.328835	0.328835	0.328835	0.328835	0.328835	0.328835	0.328835	0.328835	0.328835	0.328835	0.328835	0.328835	0.328835	0.328835	0.328835	0.328835	0.328835	0.328835
	Harvested Index soybean	sd	Calculated following Bolinder method		0.324579	0.324579	0.324579	0.324579	0.324579	0.324579	0.324579	0.324579	0.324579	0.324579	0.324579	0.324579	0.324579	0.324579	0.324579	0.324579	0.324579	0.324579	0.324579	0.324579	0.324579	0.324579	0.324579	0.324579	0.324579	0.324579	0.324579	0.324579	0.324579	0.324579	0.324579	0.324579	0.324579	0.324579
	Harvested Index other oil crops	sd	Calculated following Bolinder method		0.289401	0.289401	0.289401	0.289401	0.289401	0.289401	0.289401	0.289401	0.289401	0.289401	0.289401	0.289401	0.289401	0.289401	0.289401	0.289401	0.289401	0.289401	0.289401	0.289401	0.289401	0.289401	0.289401	0.289401	0.289401	0.289401	0.289401	0.289401	0.289401	0.289401	0.289401	0.289401	0.289401	0.289401
	Harvested Index horse beans and faba beans	sd	Calculated following Bolinder method		0.530626	0.530626	0.530626	0.530626	0.530626	0.530626	0.530626	0.530626	0.530626	0.530626	0.530626	0.530626	0.530626	0.530626	0.530626	0.530626	0.530626	0.530626	0.530626	0.530626	0.530626	0.530626	0.530626	0.530626	0.530626	0.530626	0.530626	0.530626	0.530626	0.530626	0.530626	0.530626	0.530626	0.530626
	Harvested Index peas	sd	Calculated following Bolinder method		0.57063	0.57063	0.57063	0.57063	0.57063	0.57063	0.57063	0.57063	0.57063	0.57063	0.57063	0.57063	0.57063	0.57063	0.57063	0.57063	0.57063	0.57063	0.57063	0.57063	0.57063	0.57063	0.57063	0.57063	0.57063	0.57063	0.57063	0.57063	0.57063	0.57063	0.57063	0.57063	0.57063	0.57063
	Harvested Index other protein crops	sd	Calculated following Bolinder method		0.551752	0.551752	0.551752	0.551752	0.551752	0.551752	0.551752	0.551752	0.551752	0.551752	0.551752	0.551752	0.551752	0.551752	0.551752	0.551752	0.551752	0.551752	0.551752	0.551752	0.551752	0.551752	0.551752	0.551752	0.551752	0.551752	0.551752	0.551752	0.551752	0.551752	0.551752	0.551752	0.551752	0.551752
	Harvested Index sugar beet	sd	Calculated following Bolinder method		0.796454	0.796454	0.796454	0.796454	0.796454	0.796454	0.796454	0.796454	0.796454	0.796454	0.796454	0.796454	0.796454	0.796454	0.796454	0.796454	0.796454	0.796454	0.796454	0.796454	0.796454	0.796454	0.796454	0.796454	0.796454	0.796454	0.796454	0.796454	0.796454	0.796454	0.796454	0.796454	0.796454	0.796454
	Harvested Index potatoes	sd	Calculated following Bolinder method		0.846223	0.846223	0.846223	0.846223	0.846223	0.846223	0.846223	0.846223	0.846223	0.846223	0.846223	0.846223	0.846223	0.846223	0.846223	0.846223	0.846223	0.846223	0.846223	0.846223	0.846223	0.846223	0.846223	0.846223	0.846223	0.846223	0.846223	0.846223	0.846223	0.846223	0.846223	0.846223	0.846223	0.846223
	Harvested Index other roots	sd	Calculated following Bolinder method		0.81629	0.81629	0.81629	0.81629	0.81629	0.81629	0.81629	0.81629	0.81629	0.81629	0.81629	0.81629	0.81629	0.81629	0.81629	0.81629	0.81629	0.81629	0.81629	0.81629	0.81629	0.81629	0.81629	0.81629	0.81629	0.81629	0.81629	0.81629	0.81629	0.81629	0.81629	0.81629	0.81629	0.81629
	Harvested Index green peas	sd	Calculated following Bolinder method		0.551752	0.551752	0.551752	0.551752	0.551752	0.551752	0.551752	0.551752	0.551752	0.551752	0.551752	0.551752	0.551752	0.551752	0.551752	0.551752	0.551752	0.551752	0.551752	0.551752	0.551752	0.551752	0.551752	0.551752	0.551752	0.551752	0.551752	0.551752	0.551752	0.551752	0.551752	0.551752	0.551752	0.551752
	Harvested Index dry beans	sd	Calculated following Bolinder method		0.551752	0.551752	0.551752	0.551752	0.551752	0.551752	0.551752	0.551752	0.551752	0.551752	0.551752	0.551752	0.551752	0.551752	0.551752	0.551752	0.551752	0.551752	0.551752	0.551752	0.551752	0.551752	0.551752	0.551752	0.551752	0.551752	0.551752	0.551752	0.551752	0.551752	0.551752	0.551752	0.551752	0.551752
	Harvested Index green beans	sd	Calculated following Bolinder method		0.551752	0.551752	0.551752	0.551752	0.551752	0.551752	0.551752	0.551752	0.551752	0.551752	0.551752	0.551752	0.551752	0.551752	0.551752	0.551752	0.551752	0.551752	0.551752	0.551752	0.551752	0.551752	0.551752	0.551752	0.551752	0.551752	0.551752	0.551752	0.551752	0.551752	0.551752	0.551752	0.551752	0.551752
	Harvested Index dry vegetables	sd	Calculated following Bolinder method		0.551752	0.551752	0.551752	0.551752	0.551752	0.551752	0.551752	0.551752	0.551752	0.551752	0.551752	0.551752	0.551752	0.551752	0.551752	0.551752	0.551752	0.551752	0.551752	0.551752	0.551752	0.551752	0.551752	0.551752	0.551752	0.551752	0.551752	0.551752	0.551752	0.551752	0.551752	0.551752	0.551752	0.551752
	Harvested Index dry fruits	sd	Calculated following Bolinder method		0.551752	0.551752	0.551752	0.551752	0.551752	0.551752	0.551752	0.551752	0.551752	0.551752	0.551752	0.551752	0.551752	0.551752	0.551752	0.551752	0.551752	0.551752	0.551752	0.551752	0.551752	0.551752	0.551752	0.551752	0.551752	0.551752	0.551752	0.551752	0.551752	0.551752	0.551752	0.551752	0.551752	0.551752
	Harvested Index squash and melons	sd	Calculated following Bolinder method		0.833445	0.833445	0.833445	0.833445	0.833445	0.833445	0.833445	0.833445	0.833445	0.833445	0.833445	0.833445	0.833445	0.833445	0.833445	0.833445	0.833445	0.833445	0.833445	0.833445	0.833445	0.833445	0.833445	0.833445	0.833445	0.833445	0.833445	0.833445	0.833445	0.833445	0.833445	0.833445	0.833445	0.833445
	Harvested Index cabbage	sd	Calculated following Bolinder method		0.833445	0.833445	0.833445	0.833445	0.833445	0.833445	0.833445	0.833445	0.833445	0.833445	0.833445	0.833445	0.833445	0.833445	0.833445	0.833445	0.833445	0.833445	0.833445	0.833445	0.833445	0.833445	0.833445	0.833445	0.833445	0.833445	0.833445	0.833445	0.833445	0.833445	0.833445	0.833445	0.833445	0.833445
	Harvested Index leaves vegetables	sd	Calculated following Bolinder method		0.833445	0.833445	0.833445	0.833445	0.833445	0.833445	0.833445	0.833445	0.833445	0.833445	0.833445	0.833445	0.833445	0.833445	0.833445	0.833445	0.833445	0.833445	0.833445	0.833445	0.833445	0.833445	0.833445	0.833445	0.833445	0.833445	0.833445	0.833445	0.833445	0.833445	0.833445	0.833445	0.833445	0.833445
	Harvested Index fruits	sd	Calculated following Bolinder method		0.833445	0.833445	0.833445	0.833445	0.833445	0.833445	0.833445	0.833445	0.833445	0.833445	0.833445	0.833445	0.833445	0.833445	0.833445	0.833445	0.833445	0.833445	0.833445	0.833445	0.833445	0.833445	0.833445	0.833445	0.833445	0.833445	0.833445	0.833445	0.833445	0.833445	0.833445	0.833445	0.833445	0.833445
	Harvested Index olives	sd	Calculated following Bolinder method		0.833445	0.833445	0.833445	0.833445	0.833445	0.833445	0.833445	0.833445	0.833445	0.833445	0.833445	0.833445	0.833445	0.833445	0.833445	0.833445	0.833445	0.833445	0.833445	0.833445	0.833445	0.833445	0.833445	0.833445	0.833445	0.833445	0.833445	0.833445	0.833445	0.833445	0.833445	0.833445	0.833445	0.833445
	Harvested Index citrus	sd	Calculated following Bolinder method		0.833445	0.833445	0.833445	0.833445	0.833445	0.833445	0.833445	0.833445	0.833445	0.833445	0.833445	0.833445	0.833445	0.833445	0.833445	0.833445	0.833445	0.833445	0.833445	0.833445	0.833445	0.833445	0.833445	0.833445	0.833445	0.833445	0.833445	0.833445	0.833445	0.833445	0.833445	0.833445	0.833445	0.833445
	Harvested Index hemp	sd	Calculated following Bolinder method		0.833445	0.833445	0.833445	0.833445	0.833445	0.833445	0.833445	0.833445	0.833445	0.833445	0.833445	0.833445	0.833445	0.833445	0.833445	0.833445	0.833445	0.833445	0.833445	0.833445	0.833445	0.833445	0.833445	0.833445	0.833445	0.833445	0.833445	0.833445	0.833445	0.833445	0.833445	0.833445	0.833445	0.833445
	Harvested Index flax	sd	Calculated following Bolinder method		0.833445	0.833445	0.833445	0.833445	0.833445	0.833445	0.833445	0.833445	0.833445	0.833445	0.833445	0.833445	0.833445	0.833445	0.833445	0.833445	0.833445	0.833445	0.833445	0.833445	0.833445	0.833445	0.833445	0.833445	0.833445	0.833445	0.833445	0.833445	0.833445	0.833445	0.833445	0.833445	0.833445	0.833445
	Harvested Index forage maize	sd	Calculated following Fan method		0.412424	0.442665	0.396492	0.43313	0.447754	0.394868	0.542348	0.445338	0.396284	0.393336	0.395476	0.418451	0.411329	0.394338	0.386204	0.408044	0.390016	0.390573	0.429486	0.385903	0.521458	0.403154	0.419652	0.406161	0.387958	0.418258	0.382193	0.423238	0.440758	0.398151	0.44081	0.384175	0.462645	0.418275
	Harvested Index forage cabbages	sd	Calculated following Bolinder method		0.833334	0.833334	0.833334	0.833334	0.833334	0.833334	0.833334	0.833334	0.833334	0.833334	0.833334	0.833334	0.833334	0.833334	0.833334	0.833334	0.833334	0.833334	0.833334	0.833334	0.833334	0.833334	0.833334	0.833334	0.833334	0.833334	0.833334	0.833334	0.833334	0.833334	0.833334	0.833334	0.833334	0.833334
	Harvested Index alfalfa and clover	sd	Calculated following Bolinder method		0.869536	0.869536	0.869536	0.869536	0.869536	0.869536	0.869536	0.869536	0.869536	0.869536	0.869536	0.869536	0.869536	0.869536	0.869536	0.869536	0.869536	0.869536	0.869536	0.869536	0.869536	0.869536	0.869536	0.869536	0.869536	0.869536	0.869536	0.869536	0.869536	0.869536	0.869536	0.869536	0.869536	0.869536
	Harvested Index non-legume temporary meadow	sd	Calculated following Bolinder method		0.833334	0.833334	0.833334	0.833334	0.833334	0.833334	0.833334	0.833334	0.833334	0.833334	0.833334	0.833334	0.833334	0.833334	0.833334	0.833334	0.833334	0.833334	0.833334	0.833334	0.833334	0.833334	0.833334	0.833334	0.833334	0.833334	0.833334	0.833334	0.833334	0.833334	0.833334	0.833334	0.833334	0.833334
	Harvested Index natural meadow	sd	Calculated following Bolinder method		0.852249	0.852249	0.852249	0.852249	0.852249	0.852249	0.852249	0.852249	0.852249	0.852249	0.852249	0.852249	0.852249	0.852249	0.852249	0.852249	0.852249	0.852249	0.852249	0.852249	0.852249	0.852249	0.852249	0.852249	0.852249	0.852249	0.852249	0.852249	0.852249	0.852249	0.852249	0.852249	0.852249	0.852249
	Above ground residue inputs
	Above ground residue inputs from cereals (excluding harvested straw)	ktC/yr			2043.16	1063.6	1178.94	3814.56	898.445	494.446	148.465	1703.59	3233.49	1373.47	1517.02	1312.6	1351.43	1861.41	2586.54	5385.57	2072.57	214.647	40.6865	478.735	124.237	575.544	76.2809	4620.92	292.232	1200.57	601.961	401.876	51.7187	178.677	469.845	205.576	13.5937	41586.4
	Above ground residue inputs from Rrapeseed	ktC/yr			456.4	505.004	374.26	649.58	275.75	91.1814	66.3661	401.183	856.673	676.571	590.078	63.4371	138.758	204.649	586.555	1329.63	296.695	30.6273	6.0694	27.4929	25.2011	33.3686	35.0679	283.996	4.98049	11.3819	3.18137	21.5188	0.881356	4.22407	16.4364	4.90673	0	8072.11
	Above ground residue inputs from sunflower	ktC/yr			9.64643	0.925077	1.58679	2.50626	3.06829	0.0509901	0	14.135	40.31	32.9418	11.071	1.25948	27.046	176.15	138.528	253.696	58.3627	5.82238	2.02675	8.69208	18.7515	24.1873	70.3888	648.729	9.34826	7.21447	6.37118	34.0575	1.75204	10.882	36.4451	6.68173	0.0761194	1662.71
	Above ground residue inputs from soybean	ktC/yr			0.113572	0.018302	0.0166726	0.0301011	0	0	0	0.0640312	1.46673	9.10626	2.74728	3.06243	0.0586152	0.445181	0.526389	3.09572	10.9738	5.23374	0.969419	3.66552	3.0405	3.87723	5.82367	97.4882	1.13958	3.92344	1.01277	1.47177	0.024544	0.118882	0.660048	0.038892	0	160.213
	Above ground residue inputs from other oil crops	ktC/yr			1.37533	1.87587	1.48351	3.40301	0.513501	0.0818926	0.0344259	0.639277	2.55715	5.48513	0.730641	0.31754	2.346	2.79232	5.11478	7.70028	1.05143	0.0228251	0	0.0221894	0.11833	0.0192377	0.454688	1.48775	0.0992538	0.0497199	0.0550206	0.139552	0.0186746	0.038806	0.113642	0.00783569	0.00915733	40.1587
	Above ground residue inputs from horse beans and faba beans	ktC/yr			32.6181	7.77793	0.996685	45.5605	8.80799	4.50924	0.458712	13.4358	9.72976	1.23305	1.61294	0.0680422	1.59977	1.3932	3.60156	5.06931	1.03946	0.172962	0.00295697	0.0497472	0.198537	0.0881683	0.0111915	7.86453	0.133431	0.307108	0.0404153	0.477518	0.0087872	0.0962622	0.115422	0.0387794	0.0135257	149.131
	Above ground residue inputs from peas	ktC/yr			34.5681	22.9662	15.588	59.5316	20.198	4.50778	0.5978	13.5171	37.9985	7.25452	5.46576	0.184411	4.87619	11.99	15.7183	29.4443	5.02049	0.140546	0.0617237	0.591045	1.95522	2.1621	0.0982016	16.6782	0.211234	0.236032	0.113798	0.371218	0.0336533	0.414542	1.21658	0.550273	0.105935	314.367
	Above ground residue inputs from other protein crops	ktC/yr			0.140616	0.0558225	0.143303	0.0544811	0.106405	0.0209179	0.0416537	0.00227949	0.0131082	0.011108	0.0394961	0.0190461	0.481827	0.39379	1.35548	1.14986	0.276711	0.0249482	0.00197017	0.0540186	0.00337044	0.0445108	0.00961383	0.181262	0.0196074	0.175156	0.01085	0.107554	0.00536808	0	0	0.00075089	0	4.94488
	Above ground residue inputs from sugar beet	ktC/yr			95.7114	28.1228	11.7794	338.728	24.7016	17.4358	0.0988303	142.125	161.976	3.30797	0.165215	16.2287	0.0566806	0.0330678	1.09482	48.6159	12.3749	0.52658	0	0	0	0	0	0.0800378	0.00698626	0	0.0377601	0.0503601	0	0	0	0	0	903.257
	Above ground residue inputs from potatoes	ktC/yr			3.62103	2.98787	4.35232	43.1585	0.92839	5.23168	0.396422	47.1742	12.9953	0.552074	0.252732	1.11594	4.27132	0.459385	0.281299	3.85637	0.804258	0.027071	0.111471	0.299804	0.281891	0.257181	0.0808775	0.9038	0.376707	0.0360215	0.195189	0.053282	0.0468863	0.386956	1.25869	0.386233	0.970934	138.112
	Above ground residue inputs from other roots	ktC/yr			4.88363e-12	5.82178e-12	2.75505e-12	4.40483e-12	5.28834e-12	2.77692e-12	5.69792e-12	4.9527e-12	3.21209e-12	4.7478e-12	3.32613e-12	4.63403e-12	2.90197e-12	3.32232e-12	3.9233e-12	4.37285e-12	4.77839e-12	3.14539e-12	2.51803e-12	2.92687e-12	8.78764e-12	3.63935e-12	3.13951e-12	6.14882e-12	4.68491e-12	6.24868e-12	2.65873e-12	4.69152e-12	4.76055e-12	4.7336e-12	2.78505e-11	5.15204e-12	3.2915e-11	1.95801e-10
	Above ground residue inputs from green peas	ktC/yr			0.0254369	0.00314603	0.177697	2.38274	0.00193954	0.0005393	0.00359228	5.13825	0.0185393	0.0554934	0.00110522	0.00226079	1.92683	0.0615011	0.0171011	0.0865897	0.089271	0.063488	0.000447209	0.00649142	0.000875521	0.00773069	9.4631e-05	0.159533	0.0318963	0.0489219	0.126152	0.00544901	0.000368612	0.00723568	0.0390378	0.0129367	0.00744982	10.5101
	Above ground residue inputs from dry beans	ktC/yr			0.55731	0.0463014	0.700768	3.50418	0.00463265	0.00435826	0.00902132	2.09975	0.132851	0.0368568	0.00120427	0.00409501	4.84885	0.220165	0.16784	0.209137	0.143157	0.0940117	0	0.00337672	0.00254805	0.0207981	0	0.12818	0.200638	0.390336	0.0685671	0.00842119	0.00224218	0.0567247	0.225302	0.0375998	0.0248446	13.9541
	Above ground residue inputs from green beans	ktC/yr			0.262792	0.0132976	0.231142	2.50098	0.00673016	0.00461061	0.0205613	2.97281	0.00481716	0.114644	0.0055435	0.0143384	3.23045	0.125911	0.262608	0.185437	0.16693	0.115056	0.00857968	0.0335031	0.00718974	0.0158187	0.000990509	0.547175	1.19756	0.688754	1.18724	0.0382032	0.00455481	0.0529207	0.259225	0.0293931	0.0302983	14.3401
	Above ground residue inputs from dry vegetables	ktC/yr			0.0804227	0.0084493	0.116404	0.0600833	0	0	0.000349664	0.603646	1.17006	0.0869849	0.016171	0.000639846	0	0.815725	0.197544	2.39076	1.60323	0	0	0.000350245	0.0492354	0.0519813	0.0105193	1.92807	0.0025803	0.108041	0.0135299	0.0101414	0.0193981	0.00736383	0	1.11063	0.0191889	10.4815
	Above ground residue inputs from dry fruits	ktC/yr			0.0379711	0.00874404	0	0.00036492	0.0210944	0	0.00257003	0.000387513	0.0226043	0	0.00989954	0.0126974	0.0029295	0.611233	0.190261	0.187911	0.15537	0.00299668	0.0285559	0.00731024	0.144942	7.25136	0.147767	4.00808	0.192897	0.159549	0.0209168	5.48091	0.779744	0.124009	0.262774	0.275743	0.268999	20.4206
	Above ground residue inputs from squash and melons	ktC/yr			0.139956	0.0204828	0.00695782	0.0242308	0.0102166	0.0258528	0.028525	0.317913	0.179016	0.0445067	0.169837	0.0666786	0.21413	0.459106	0.948873	1.23478	0.0585388	0.00359329	0.0253599	0.108306	0.614027	0.293059	0.000947765	2.40389	0.0827118	0.0724266	0.0164511	0.215916	0.00999112	2.67254	4.93435	1.5387	1.89471	18.8366
	Above ground residue inputs from cabbage	ktC/yr			0.0896534	0.0188053	0.00489174	0.014218	0.0342771	0.0202267	0.470374	0.997989	0.122893	0.0265594	0.00567064	0.666678	2.46782	0.0433211	0.126324	0.0573157	0.0245973	0.00378726	0.00601524	0.0580673	0.00618509	0.0278737	0.000906297	0.140061	0.00367328	0.0318185	0.0040571	0.00285154	0.00117008	0.115021	0.593983	0.0158798	0.0364798	6.23944
	Above ground residue inputs from leaves vegetables	ktC/yr			0.534133	0.0528399	0.0248394	2.49144	0.149849	0.0556116	0.743633	5.39041	0.21389	0.072335	0.0175628	0.109455	1.14345	0.129211	0.947005	0.451994	0.165001	0.00583158	0.0316051	0.367201	0.144609	0.126347	0.00459602	0.638394	0.0965118	0.0609046	0.0325596	0.0331499	0.00819055	1.35704	5.31057	0.357358	4.72663	25.9942
	Above ground residue inputs from fruits	ktC/yr			0.300791	0.673374	0.0945437	0.96934	1.9978	0.244624	0.537382	0.424312	0.191248	0.0383109	0.309162	0.448968	0.734595	0.493899	5.88963	2.32256	1.0975	0.00990072	0.25669	0.447077	6.05368	3.28193	0.0233769	14.3773	0.478291	0.367682	0.179905	1.96583	1.19062	8.37925	23.1417	4.21023	14.6517	95.7833
	Above ground residue inputs from olives	ktC/yr			0	0	0	0	0	0	0	0	0	0	0	0	0	2.19043e-05	0	0	0	0	0	0	0.0619552	0.0306364	0	0.0233177	0	0	0	0	0	0.207422	1.15793	0.14249	0.0872428	1.71102
	Above ground residue inputs from citrus	ktC/yr			0	0	0	0	0	0	0	0	0	0	0	0	0	0	0	0	0	0	0	0	0	0	0	0	0	0	0	0	0	0	0.0252506	0	0	0.0252506
	Above ground residue inputs from hemp	ktC/yr			0.219097	0.113363	0.00450895	0	0.0485806	0.000493773	0	0	2.00418	0.177911	0.323858	0.00370334	0.0387094	0.0730708	0.795278	0.0727768	0.0117902	0.0806103	0	0	0	0.00532727	0.0017406	0.653192	0	0.0963473	0	0.0290101	0.000998668	0	0	0.00505399	0	4.75961
	Above ground residue inputs from flax	ktC/yr			1.06833	10.9518	0.122378	5.72481	4.57595	8.63631	0.00152544	7.97701	0.181346	0.00233979	0.00664529	0	0.00175965	0	0	0.0153457	0	0	0	0	0	0	0.00125449	0.025798	0	0	0	0.000693617	0	0	0	0	0	39.2933
	Above ground residue inputs from forage maize	ktC/yr			7.6885	36.5806	6.41671	160.79	313.889	93.7833	221.887	249.118	67.0875	77.2301	215.087	48.164	686.633	217.934	744.111	102.926	281.605	21.7293	5.39936	49.4339	4.45965	33.5834	32.4779	159.462	13.8302	148.106	15.9599	62.1406	26.2097	2.93481	12.9875	1.18151	2.45512	4123.28
	Above ground residue inputs from forage cabbages	ktC/yr			0.128153	0.101563	0.0557452	0.265692	0.201714	0.0512098	0.116402	0.184732	0.240624	0.165374	0.211787	0.0699228	0.22143	0.193377	0.389712	0.476483	0.636918	0.0653765	0.0297122	0.05433	0.161515	0.107868	0.108428	0.572859	0.0568539	0.184323	0.0258344	0.127137	0.126828	0.0586854	0.276329	0.0877237	0.196082	5.95072
	Above ground residue inputs from alfalfa and clover	ktC/yr			1.69149	3.30864	0.359687	5.00632	1.64653	0.238483	1.24372	1.31867	46.0872	6.98571	4.35961	1.13272	2.30549	7.83131	10.4745	10.9134	14.0426	0.989682	0.616477	1.77813	17.1038	9.64444	6.44751	36.6759	0.59857	2.13534	0.0663172	8.14802	0.824975	3.12667	14.1925	2.67674	1.49289	225.464
	Above ground residue inputs from non-legume temporary meadow	ktC/yr			3.35366	7.98755	2.23052	12.4934	55.9717	12.0628	86.2121	15.2106	11.7899	19.6098	35.6852	10.012	288.576	139.715	375.882	168.355	399.249	34.0294	9.18933	26.3993	24.6727	18.854	120.679	200.474	5.0892	116.145	6.65455	81.5571	78.6715	2.48795	7.12271	4.12502	1.15063	2381.7
	Above ground residue inputs from natural meadow	ktC/yr			0	1.14417e-09	0	0	137.455	68.2306	93.4996	0	0	0	293.095	0	65.844	113.073	179.823	0	787.404	139.941	71.9866	93.3422	71.8088	88.8814	126.573	172.122	0	99.0383	0	94.8743	182.263	0	0	0	0	2879.25
	Above ground residue inputs from weeds	ktC/yr	Assuming half weeds biomass production to be grazed and therefore already accounted in the dejection inputs		0.101113	0.0638516	0.047343	0.254119	0.0902269	0.0341365	0.0491595	0.146532	0.170669	0.0725683	0.0866971	0.0570022	0.17142	0.119716	0.235824	0.284124	0.201868	0.0189265	0.00477672	0.0258872	0.0159924	0.0303518	0.0402897	0.244617	0.0119347	0.0793801	0.0213641	0.0422701	0.0246143	0.0105587	0.0315473	0.0099141	0.00695232	2.80575
	Total above ground residue inputs to arable land	ktC/yr			2693.63	1693.29	1599.74	5153.59	1611.17	732.628	527.785	2627.76	4486.83	2214.66	2385.48	1459.06	2523.45	2628.54	4479.95	7358	3158.42	314.457	65.5271	598.325	227.286	712.881	348.161	6100.79	330.421	1492.57	637.357	619.929	162.365	216.436	596.652	234.004	41.8187	60033
	Total above ground residue inputs to permanent grassland	ktC/yr			0	1.14417e-09	0	0	137.455	68.2306	93.4996	0	0	0	293.095	0	65.844	113.073	179.823	0	787.404	139.941	71.9866	93.3422	71.8088	88.8814	126.573	172.122	0	99.0383	0	94.8743	182.263	0	0	0	0	2879.25
	Average root production per hecate
	wheat	kgC/ha/yr	Derived from Bolinder 2007 (see Le Noe et al., 2019 SM for description)		305	280	292	294	258	292	239	307	263	230	226	232	231	229	236	237	216	232	205	225	179	199	167	216	206	191	186	186	178	155	136	244	191	226.152
	rye	kgC/ha/yr	Derived from Bolinder 2007 (see Le Noe et al., 2019 SM for description)		230	218	225	234	194	210	180	241	255	175	192	187	182	163	195	173	187	182	156	191	146	150	139	201	160	176	140	223	151	120	109	120	119	179.515
	barley	kgC/ha/yr	Derived from Bolinder 2007 (see Le Noe et al., 2019 SM for description)		187	176	190	190	167	187	152	219	168	145	153	151	160	154	146	155	140	151	131	143	120	132	119	156	136	134	125	129	124	115	101	119	110	148.03
	oat	kgC/ha/yr	Derived from Bolinder 2007 (see Le Noe et al., 2019 SM for description)		731	682	695	695	637	675	561	763	548	489	525	542	576	517	548	516	446	524	469	477	357	463	361	545	522	487	472	473	394	396	370	383	499	525.394
	grain maize	kgC/ha/yr	Derived from Bolinder 2007 (see Le Noe et al., 2019 SM for description)		389	358	354	372	340	228	224	258	247	329	294	313	282	315	300	309	304	309	300	353	333	325	234	350	309	336	321	265	272	314	321	263	289	306.364
	rice	kgC/ha/yr	Derived from Bolinder 2007 (see Le Noe et al., 2019 SM for description)																															518	38	54	54	166
	other cereals	kgC/ha/yr	Derived from Bolinder 2007 (see Le Noe et al., 2019 SM for description)		291	270	281	283	247	246	215	348	220	198	225	253	209	191	216	207	204	225	189	218	175	205	187	216	193	205	185	196	182	179	179	164	152	216.788
	rapeseed	kgC/ha/yr	Derived from Bolinder 2007 (see Le Noe et al., 2019 SM for description)		582	596	616	518	655	551	519	592	424	450	436	450	492	424	473	568	415	450	461	451	445	445	426	468	434	418	391	391	477	477	400	400	643	482.97
	sunflower	kgC/ha/yr	Derived from Bolinder 2007 (see Le Noe et al., 2019 SM for description)		117	72	108	72	61	35	35	35	113	110	74	74	48	93	102	91	101	82	38	67	98	94	64	84	70	80	77	71	56	98	57	85	59	76.3939
	soybean	kgC/ha/yr	Derived from Bolinder 2007 (see Le Noe et al., 2019 SM for description)		36	39	53	56	56	56	56	56	58	63	62	64	6	54	52	57	65	57	66	62	57	64	54	59	52	64	59	52	16	55	47	47	20	52.1212
	other oil crops	kgC/ha/yr	Derived from Bolinder 2007 (see Le Noe et al., 2019 SM for description)		70	66	64	60	28	42	22	39	74	47	52	6	198	128	152	58	139	306	74	9	25	85	8	37	25	41	23	42	5	17	33	12	3	60.303
	horse beans and faba beans	kgC/ha/yr	Derived from Bolinder 2007 (see Le Noe et al., 2019 SM for description)		274	274	248	243	256	254	246	294	208	171	218	204	205	452	199	174	206	306	174	169	165	158	133	139	134	129	140	141	168	161	173	159	160	204.091
	ratio peas	kgC/ha/yr	Derived from Bolinder 2007 (see Le Noe et al., 2019 SM for description)		286	313	333	302	313	322	257	335	282	250	252	236	309	233	243	251	208	218	240	237	154	381	143	196	267	1227	330	946	224	205	132	250	198	305.242
	other protein crops	kgC/ha/yr	Derived from Bolinder 2007 (see Le Noe et al., 2019 SM for description)		223	435	299	222	236	405	227	225	228	225	243	213	295	242	232	253	206	235	255	246	203	180	108	165	202	207	198	215	225	135	135	180	180	226.606
	sugar beet	kgC/ha/yr	Derived from Bolinder 2007 (see Le Noe et al., 2019 SM for description)		724	673	642	684	590	709	629	762	684	617	524	603	556	514	561	636	555	627	627	627	627	627	627	627	627	627	627	627	627	627	627	627	627	627.121
	potatoes	kgC/ha/yr	Derived from Bolinder 2007 (see Le Noe et al., 2019 SM for description)		38	34	38	39	31	34	28	41	40	28	30	31	29	20	26	29	26	26	26	24	26	22	23	21	24	22	24	22	28	29	26	22	34	28.5152
	other roots	kgC/ha/yr	Derived from Bolinder 2007 (see Le Noe et al., 2019 SM for description)		427	544	485	524	375	329	615	421	279	289	334	464	420	497	320	336	274	229	319	400	218	303	244	207	246	251	202	262	241	622	197	440	389	354.636
	green peas	kgC/ha/yr	Derived from Bolinder 2007 (see Le Noe et al., 2019 SM for description)		39	37	28	35	46	96	67	37	52	44	43	39	84	33	37	31	39	24	38	61	42	51	22	27	50	52	59	25	73	61	37	65	34	45.697
	dry beans	kgC/ha/yr	Derived from Bolinder 2007 (see Le Noe et al., 2019 SM for description)		300	218	348	389	273	267	399	345	267	238	241	192	334	213	214	271	336	346	148	329	179	246	90	235	219	157	159	159	374	216	228	436	494	268.485
	green beans	kgC/ha/yr	Derived from Bolinder 2007 (see Le Noe et al., 2019 SM for description)		88	71	82	94	69	67	74	84	64	108	93	91	103	54	57	61	80	80	119	74	60	79	45	90	69	90	85	78	75	85	83	63	70	78.3333
	dry vegetables	kgC/ha/yr	Derived from Bolinder 2007 (see Le Noe et al., 2019 SM for description)		228	178	161	169	110	90	135	248	136	106	157	117	127	124	142	148	78	98	87	157	115	109	109	103	124	104	189	95	88	106	74	118	102	128.242
	dry fruits	kgC/ha/yr	Derived from Bolinder 2007 (see Le Noe et al., 2019 SM for description)		203	184		162	233	147	147	153	189	195	195	159	84	234	158	181	162	207	198	159	93	169	73	205	163	165	233	150	172	297	111	67	74	166.312
	squash and melons	kgC/ha/yr	Derived from Bolinder 2007 (see Le Noe et al., 2019 SM for description)
	cabbage	kgC/ha/yr	Derived from Bolinder 2007 (see Le Noe et al., 2019 SM for description)		2148	2156	1974	2859	2605	2116	2756	2250	1679	1163	2501	2700	2469	1507	1820	1569	1000	1921	2024	1161	1122	1139	1032	896	1156	903	1265	1394	1496	1416	1119	2335	853	1712.24
	leaves vegetables	kgC/ha/yr	Derived from Bolinder 2007 (see Le Noe et al., 2019 SM for description)		576	540	556	845	655	520	490	790	443	455	368	331	400	328	361	263	412	590	460	432	404	261	246	377	272	488	170	170	508	446	387	288	518	434.848
	fruits	kgC/ha/yr	Derived from Bolinder 2007 (see Le Noe et al., 2019 SM for description)		512	770	846	958	800	639	765	1093	672	656	299	654	614	754	1114	876	626	620	770	426	944	580	312	755	580	705	608	766	1082	957	935	713	1437	752.667
	olives	kgC/ha/yr	Derived from Bolinder 2007 (see Le Noe et al., 2019 SM for description)																						53	65		78						78	75	98	67	73.4286
	citrus	kgC/ha/yr	Derived from Bolinder 2007 (see Le Noe et al., 2019 SM for description)																																360			360
	hemp	kgC/ha/yr	Derived from Bolinder 2007 (see Le Noe et al., 2019 SM for description)		305	280	292	294	258	292	239	307	263	230	226	232	231	229	236	237	216	232	205	225	179	199	167	216	206	191	186	186	178	155	136	244	191	226.152
	flax	kgC/ha/yr	Derived from Bolinder 2007 (see Le Noe et al., 2019 SM for description)		305	280	292	294	258	292	239	307	263	230	226	232	231	229	236	237	216	232	205	225	179	199	167	216	206	191	186	186	178	155	136	244	191	226.152
	forage maize	kgC/ha/yr	Derived from Bolinder 2007 (see Le Noe et al., 2019 SM for description)		389	358	354	372	340	228	224	258	247	329	294	313	282	315	300	309	304	309	300	353	333	325	234	350	309	336	321	265	272	314	321	263	289	306.364
	forage cabbages	kgC/ha/yr	Derived from Bolinder 2007 (see Le Noe et al., 2019 SM for description)		2148	2156	1974	2859	2605	2116	2756	2250	1679	1163	2501	2700	2469	1507	1820	1569	1000	1921	2024	1161	1122	1139	1032	896	1156	903	1265	1394	1496	1416	1119	2335	853	1712.24
	Root shoot ratio alfalfa and clover	kgC/ha/yr	Derived from Bolinder 2007 (see Le Noe et al., 2019 SM for description)		1098	1085	839	1084	968	1032	1022	1112	975	812	886	990	926	846	906	756	842	843	874	874	837	838	704	755	794	940	940	820	870	903	809	713	868	895.788
	non-legume temporary meadow	kgC/ha/yr	Derived from Bolinder 2007 (see Le Noe et al., 2019 SM for description)		1256	1221	1087	1341	1230	1454	1424	1353	929	942	1025	998	1616	1138	1258	960	964	1056	955	1219	868	1027	869	901	898	1405	1294	833	1213	1005	716	468	932	1086.52
	natural meadow	kgC/ha/yr	Derived from Bolinder 2007 (see Le Noe et al., 2019 SM for description)		942	837	948	1010	824	1060	1051	1007	771	680	770	772	735	741	808	695	631	575	474	695	252	469	455	512	552	491	579	538	641	559	215	251	386	664.424
	weeds	kgC/ha/yr	Derived from Bolinder 2007 (see Le Noe et al., 2019 SM for description)		942	837	948	1010	824	1060	1051	1007	771	680	770	772	735	741	808	695	631	575	474	695	252	469	455	512	552	491	579	538	641	559	215	251	386	664.424
	Root residue inputs
	Root residue inputs from wheat	ktC/yr			80.4918	55.0917	66.8032	198.083	67.0586	45.2038	14.7592	112.465	154.23	58.0733	78.2653	12.3435	77.8932	71.0868	120.866	242.307	67.3363	6.21473	0.406129	9.10062	4.32624	13.9048	2.40605	114.193	2.32069	2.12176	0.57167	8.76809	1.86053	10.4086	5.78442	26.1389	1.80728	1732.69
	Root residue inputs from rye	ktC/yr			0.133763	0.0127803	0.491014	0.123595	0.0665455	0.00986051	0.00196908	0.0314437	0.115706	0.189906	0.211232	0.0206764	0.0583617	0.0714979	0.255513	0.899702	1.05589	0.120971	0.00460484	0.0725992	0.0416408	0.143219	0.206055	0.0630487	0.013453	0.00508252	0.0098624	0.0406142	0.169912	0.0229346	0.00669615	0.0047121	0.149035	4.8239
	Root residue inputs from barley	ktC/yr			14.0652	6.2149	11.6	21.4201	7.27689	6.234	1.18551	15.3482	52.307	23.7621	30.9022	0.7182	10.8139	8.2719	8.91136	43.6733	13.6986	1.83855	0.132985	1.42647	0.97892	2.61331	3.21203	10.1265	0.235557	0.304641	0.0653264	2.3609	0.353344	0.388423	0.178007	0.813552	0.0751046	301.507
	Root residue inputs from oat	ktC/yr			2.07526	0.685822	0.79958	2.4753	5.26514	0.631718	0.359872	2.20673	2.83072	2.25776	2.43892	0.270685	5.56399	1.13534	3.92684	5.9346	4.03094	0.348251	0.0162094	0.364681	0.413617	0.497676	0.724448	2.59751	0.230271	0.109824	0.051192	0.871435	0.211418	0.0989351	0.0775642	0.261904	0.554175	50.3183
	Root residue inputs from grain maize	ktC/yr			17.604	2.71351	10.0205	18.7067	4.86135	1.05795	2.60997	6.67407	15.4551	8.26733	12.3095	61.4558	41.1191	58.3086	42.4405	73.4517	38.2671	5.54954	1.20166	22.7439	1.82252	25.5788	0.422321	98.1669	24.6012	61.4403	55.0219	14.2334	1.14747	2.59624	2.34305	1.05233	0.38409	733.628
	Root residue inputs from rice	ktC/yr			0	0	0	0	0	0	0	0	0	0	0	0	0	0	0	0	0	0	0	0	0	0	0	0	0	0	0	0	0	11.9364	1.27457	0.479735	0	13.6907
	Root residue inputs from other cereals	ktC/yr			0.480985	0.18739	0.396515	0.505252	2.12816	0.27613	0.723278	0.784783	1.11112	2.03038	3.59622	0.542727	10.8751	3.30639	12.1297	10.6033	19.1566	0.835156	0.0979461	1.31682	0.763939	2.61375	4.37144	11.6504	0.40934	1.07621	0.325321	3.56666	2.32524	0.56242	0.533619	0.892575	0.438725	100.614
	Root residue inputs from Rrapeseed	ktC/yr			38.3617	42.8217	51.5504	47.8665	29.5867	12.7281	5.81623	34.783	79.3649	66.9076	65.6119	4.52905	15.9204	19.1879	54.2878	157.104	24.958	2.59845	0.301956	2.56204	1.87678	3.46259	4.1983	20.6579	0.653367	0.663597	0.363365	1.85303	0.10221	1.00354	0.991999	0.996005	0	793.671
	Root residue inputs from sunflower	ktC/yr			0.165263	0.00960786	0.0388523	0.0260268	0.0310857	0.000458408	0	0.0734618	1.0091	0.807391	0.211835	0.0149923	0.306951	3.67291	2.80327	4.86916	1.21144	0.0912642	0.00842703	0.122006	0.311811	0.537541	1.28361	8.58743	0.200548	0.0816208	0.145297	0.539947	0.0241852	0.538537	0.317799	0.292221	0.00219728	28.3362
	Root residue inputs from soybean	ktC/yr			0.00179759	0.000309152	0.000601511	0.000730005	0	0	0	0.00159871	0.0565864	0.38381	0.132242	0.0946637	0.000249678	0.0161833	0.0163053	0.111745	0.440158	0.171225	0.0210203	0.142956	0.088296	0.176153	0.269049	2.72155	0.0545294	0.106622	0.0531377	0.0513115	0.000290654	0.00991402	0.0142497	0.00282393	0	5.14011
	Root residue inputs from other oil crops	ktC/yr			0.0209251	0.0265095	0.0319507	0.0437135	0.00354464	0.00131139	0.000192472	0.00549527	0.0622255	0.0852641	0.0145823	0.000454918	0.163026	0.118948	0.228947	0.139821	0.0445839	0.0019818	0	6.21024e-05	0.000745075	0.000573861	0.00153847	0.0128763	0.00112879	0.000427916	0.000556337	0.00194269	3.41648e-05	0.0004945	0.000851592	7.18125e-05	1.99511e-05	1.0148
	Root residue inputs from horse beans and faba beans	ktC/yr			5.39219	1.26667	0.230895	6.57946	1.54306	1.21218	0.0796029	2.4168	1.84731	0.193577	0.374616	0.00919995	0.319499	0.581742	0.585872	0.766531	0.181323	0.0416861	0.000231963	0.00725721	0.0229026	0.0135706	0.00174751	0.709807	0.0225778	0.0230844	0.00690482	0.0619471	0.00149938	0.0322474	0.0125866	0.0130717	0.00436263	24.556
	Root residue inputs from peas	ktC/yr			7.21249	5.16618	5.8631	12.9193	5.23127	1.85754	0.131048	3.35	11.8271	2.01332	1.7744	0.034879	1.77494	3.1206	3.77536	7.76595	1.06924	0.0291796	0.00807559	0.146208	0.254544	0.970326	0.0199353	2.56652	0.0861158	0.204052	0.0554134	0.390679	0.00925794	0.213807	0.122398	0.352648	0.0511283	80.3669
	Root residue inputs from other protein crops	ktC/yr			0.0211878	0.0161636	0.044825	0.00804981	0.0192456	0.0100414	0.00747006	0.000351431	0.00305522	0.00256972	0.0114516	0.0030113	0.155082	0.0985935	0.287892	0.283131	0.0540584	0.00517149	0.000253664	0.0128465	0.000535715	0.00874092	0.00136518	0.0217487	0.00560123	0.0236605	0.00293605	0.0238269	0.00137386	0	0	0.000320904	0	1.13456
	Root residue inputs from sugar beet	ktC/yr			36.5487	9.83413	6.17556	120.369	8.71882	11.4375	0.0383361	57.9253	88.4081	1.63808	0.080632	5.67013	0.0268399	0.0137265	0.438911	23.4899	5.08426	0.227334	0	0	0	0	0	0.0284858	0.00483556	0	0.0252576	0.0253968	0	0	0	0	0	376.21
	Root residue inputs from potatoes	ktC/yr			0.125619	0.0913637	0.233772	1.5136	0.0298018	0.284863	0.0118482	1.79061	0.717964	0.0214741	0.012223	0.0346948	0.182601	0.0128431	0.00904658	0.147059	0.0267936	0.000838843	0.00197716	0.00939827	0.00775354	0.00834016	0.00330461	0.0186479	0.0172751	0.000698728	0.00865024	0.00163192	0.00201762	0.0353311	0.031214	0.0272579	0.100698	5.52121
	Root residue inputs from other roots	ktC/yr			1.38107e-12	2.0663e-12	1.37014e-12	1.50573e-12	1.48973e-12	1.0614e-12	2.71354e-12	1.40037e-12	8.97957e-13	1.38279e-12	1.29924e-12	1.56439e-12	1.30344e-12	1.67442e-12	1.12655e-12	1.40161e-12	1.21703e-12	6.22757e-13	3.97525e-13	1.10935e-12	1.47021e-12	1.17919e-12	9.87239e-13	9.07205e-13	1.59753e-12	1.00321e-12	7.19439e-13	1.24142e-12	1.27913e-12	6.72489e-12	3.7963e-12	5.27543e-12	2.83337e-11	8.15002e-11
	Root residue inputs from green peas	ktC/yr			0.000791338	9.14725e-05	0.00614496	0.0655264	8.07236e-05	7.24453e-05	0.000224479	0.153789	0.00116345	0.00296379	6.69433e-05	7.72644e-05	0.208477	0.00247886	0.000683852	0.00308416	0.0038979	0.00158671	1.01297e-05	0.00045192	3.39902e-05	0.000507802	3.23157e-06	0.00369782	0.00266262	0.00195985	0.0120089	0.000165709	3.61344e-05	0.00121422	0.00120375	0.00235695	0.000675106	0.478188
	Root residue inputs from dry beans	ktC/yr			0.047071	0.00279949	0.106301	0.378017	0.000403867	0.000574692	0.00118489	0.206822	0.0151088	0.00375794	0.00014429	0.000243172	0.736247	0.0202156	0.0137009	0.0229833	0.0190069	0.0119552	0	0.000447492	0.000148799	0.00232578	0	0.00912687	0.0258916	0.0166631	0.00620827	0.000574861	0.00039744	0.0118965	0.0151095	0.0162177	0.0115454	1.70309
	Root residue inputs from green beans	ktC/yr			0.0184471	0.000741921	0.0234086	0.184718	0.000420164	0.000432257	0.0014191	0.202001	0.000372068	0.015029	0.000726202	0.0011434	0.428583	0.00830448	0.0161778	0.0129968	0.0149513	0.00958504	0.000608582	0.00282949	0.000398751	0.00160955	6.91877e-05	0.0422765	0.137957	0.0477554	0.162822	0.0036248	0.000458733	0.0123747	0.017931	0.00519037	0.0056528	1.38102
	Root residue inputs from dry vegetables	ktC/yr			0.0123897	0.00100111	0.019606	0.00675814	0	0	3.72931e-05	0.102578	0.162671	0.00948017	0.00302928	5.55686e-05	0	0.104649	0.0256804	0.344366	0.118593	0	0	5.3159e-05	0.00443329	0.0061815	0.0015076	0.144412	0.000452485	0.00733245	0.00349482	0.000992717	0.00194171	0.00181892	0	0.311156	0.00441887	1.39909
	Root residue inputs from dry fruits	ktC/yr			0.0028935	0.000594973	0	2.18588e-05	0.0020927	0	0.000165816	2.25697e-05	0.0024263	0	0.00127962	0.000832544	0.000149159	0.0822089	0.0152892	0.01839	0.0132611	0.000303981	0.001586	0.000624255	0.0058635	0.742769	0.0078795	0.331942	0.0247032	0.0095441	0.0037004	0.470624	0.084752	0.0476804	0.0114392	0.0243687	0.0249672	1.93238
	Root residue inputs from squash and melons	ktC/yr			0	0	0	0	0	0	0	0	0	0	0	0	0	0	0	0	0	0	0	0	0	0	0	0	0	0	0	0	0	0	0	0	0	0
	Root residue inputs from cabbage	ktC/yr			0.449635	0.0932569	0.0349075	0.0934868	0.236473	0.175297	3.53899	5.31668	0.728876	0.109743	0.0584739	4.617	22.9718	0.233396	0.727312	0.302435	0.0806063	0.0221756	0.0212417	0.225207	0.018776	0.119688	0.00424946	0.315342	0.0207509	0.0647902	0.0242375	0.0141533	0.0068802	1.31146	1.62136	0.304207	0.242758	44.1057
	Root residue inputs from leaves vegetables	ktC/yr			0.438987	0.0401077	0.0305101	2.95887	0.158849	0.0723807	0.6079	6.16172	0.204546	0.0714594	0.0162846	0.0567892	1.0538	0.092592	0.660909	0.244311	0.13614	0.00640885	0.0155011	0.323836	0.0965964	0.0759726	0.00313921	0.369578	0.078396	0.0409574	0.0159746	0.0122622	0.00999427	2.97827	3.06371	0.516006	11.6728	32.2855
	Root residue inputs from fruits	ktC/yr			0.0665887	0.220854	0.0535448	0.3955	0.783823	0.118561	0.20783	0.20335	0.0840716	0.0165353	0.0705797	0.13947	0.314908	0.246545	3.84363	1.26711	0.416935	0.00346487	0.0638605	0.117819	2.86326	1.32891	0.00613666	5.05111	0.251045	0.108245	0.0956607	0.992881	0.937697	11.9575	9.77437	4.56079	30.4176	76.9801
	Root residue inputs from olives	ktC/yr			0	0	0	0	0	0	0	0	0	0	0	0	0	0	0	0	0	0	0	0	0.011023	0.0093146	0	0.00567044	0	0	0	0	0	0.161639	0.262845	0.142145	0.0565793	0.649217
	Root residue inputs from citrus	ktC/yr			0	0	0	0	0	0	0	0	0	0	0	0	0	0	0	0	0	0	0	0	0	0	0	0	0	0	0	0	0	0	0.00739142	0	0	0.00739142
	Root residue inputs from hemp	ktC/yr			0.0202255	0.00946423	0.000616979	0	0.00430285	7.65507e-05	0	0	0.241365	0.0188458	0.0391186	0.000285671	0.00437013	0.00775469	0.0769657	0.00751935	0.00108184	0.00738932	0	0	0	0.000518076	0.0001712	0.0459574	0	0.00537921	0	0.00249047	9.05731e-05	0	0	0.0013115	0	0.495301
	Root residue inputs from flax	ktC/yr			0.098621	0.914327	0.0167455	0.501778	0.405298	1.3389	0.000129019	0.751649	0.0218396	0.00024785	0.00080268	0	0.000198657	0	0	0.00158553	0	0	0	0	0	0	0.000123387	0.0018151	0	0	0	5.9546e-05	0	0	0	0	0	4.05412
	Root residue inputs from forage maize	ktC/yr			0.906959	4.42693	0.998232	19.4488	42.4023	10.5744	29.7535	22.6088	7.10962	10.8301	31.5603	5.14829	94.3863	29.5673	82.2188	13.6425	33.1907	2.42696	0.393669	6.77823	0.810151	5.14288	4.62003	17.7488	2.44947	14.9287	2.76951	7.96125	4.08643	0.908328	1.48339	0.294281	0.881837	512.458
	Root residue inputs from forage cabbages	ktC/yr			0.214069	0.167753	0.132493	0.581866	0.463496	0.147821	0.291694	0.327785	0.475334	0.227592	0.727381	0.161285	0.686516	0.347	0.747325	0.837409	0.69518	0.127498	0.0349465	0.0701812	0.163305	0.154269	0.169332	0.429579	0.106973	0.125009	0.0514046	0.210175	0.248389	0.222864	0.251226	0.559724	0.434601	10.5915
	Root residue inputs from alfalfa and clover	ktC/yr			4.72869	9.00413	1.18961	13.6099	4.60282	1.09921	3.78392	3.78604	173.09	21.9763	17.3663	3.13652	8.77699	25.8283	32.7365	30.2571	42.2525	2.77303	1.0251	5.66112	42.2368	33.2248	22.4884	75.8742	2.53262	4.93568	0.32103	25.9413	3.07627	24.7911	30.5416	17.0743	11.0238	700.746
	Root residue inputs from non-legume temporary meadow	ktC/yr			3.59174	8.19254	3.20097	14.0716	66.5856	26.2352	122.397	17.7956	14.13	23.9684	55.0763	9.35988	642.095	207.589	546.3	198.504	460.616	40.0015	5.59179	39.26	21.1611	26.6589	174.009	165.759	8.15618	134.386	14.8515	88.3404	136.984	7.35293	4.54329	5.78425	3.05534	3295.6
	Root residue inputs from natural meadow	ktC/yr			0	5.65473e-09	0	0	151.631	68.67	127.361	0	0	0	303.806	0	114.798	128.912	283.86	0	937.595	189.308	107.082	126.402	65.3651	123.81	186.675	186.478	0	146.14	0	120.068	266.389	0	0	0	0	3634.35
	Root residue inputs from weed	ktC/yr			0	0	0	0	0	0	0	0	0	0	0	0	0	0	0	0	0	0	0	0	0	0	0	0	0	0	0	0	0	0	0	0	0	0
	Total root residue inputs to arable land	ktonC/yr			213.298	147.213	160.094	482.938	247.466	120.708	186.309	295.473	605.613	223.884	300.868	108.364	936.837	433.134	918.346	817.012	714.174	63.4662	9.34979	90.4687	78.2821	117.998	218.431	538.254	42.6436	220.84	75.0243	156.742	151.646	77.6069	63.2839	60.9244	61.3994	8938.09
	Total root residue inputs to Parmanent grassland	ktonC/yr			0	5.65473e-09	0	0	151.631	68.67	127.361	0	0	0	303.806	0	114.798	128.912	283.86	0	937.595	189.308	107.082	126.402	65.3651	123.81	186.675	186.478	0	146.14	0	120.068	266.389	0	0	0	0	3634.35
	Humification coeff for above-ground part (efficient fraction remaining after 1 yr)
	Cereals	sd	Clivot et al. 2017		0.217	0.217	0.217	0.217	0.217	0.217	0.217	0.217	0.217	0.217	0.217	0.217	0.217	0.217	0.217	0.217	0.217	0.217	0.217	0.217	0.217	0.217	0.217	0.217	0.217	0.217	0.217	0.217	0.217	0.217	0.217	0.217	0.217	0.217
	Rapeseed	sd	Clivot et al. 2017		0.227	0.227	0.227	0.227	0.227	0.227	0.227	0.227	0.227	0.227	0.227	0.227	0.227	0.227	0.227	0.227	0.227	0.227	0.227	0.227	0.227	0.227	0.227	0.227	0.227	0.227	0.227	0.227	0.227	0.227	0.227	0.227	0.227	0.227
	Sunflower	sd	Clivot et al. 2017		0.251	0.251	0.251	0.251	0.251	0.251	0.251	0.251	0.251	0.251	0.251	0.251	0.251	0.251	0.251	0.251	0.251	0.251	0.251	0.251	0.251	0.251	0.251	0.251	0.251	0.251	0.251	0.251	0.251	0.251	0.251	0.251	0.251	0.251
	Soybean	sd	Clivot et al. 2017		0.276	0.276	0.276	0.276	0.276	0.276	0.276	0.276	0.276	0.276	0.276	0.276	0.276	0.276	0.276	0.276	0.276	0.276	0.276	0.276	0.276	0.276	0.276	0.276	0.276	0.276	0.276	0.276	0.276	0.276	0.276	0.276	0.276	0.276
	Other oil crops	sd	Clivot et al. 2017		0.251333	0.251333	0.251333	0.251333	0.251333	0.251333	0.251333	0.251333	0.251333	0.251333	0.251333	0.251333	0.251333	0.251333	0.251333	0.251333	0.251333	0.251333	0.251333	0.251333	0.251333	0.251333	0.251333	0.251333	0.251333	0.251333	0.251333	0.251333	0.251333	0.251333	0.251333	0.251333	0.251333	0.251333
	Horse beans and faba beans	sd	Clivot et al. 2017		0.276	0.276	0.276	0.276	0.276	0.276	0.276	0.276	0.276	0.276	0.276	0.276	0.276	0.276	0.276	0.276	0.276	0.276	0.276	0.276	0.276	0.276	0.276	0.276	0.276	0.276	0.276	0.276	0.276	0.276	0.276	0.276	0.276	0.276
	Peas	sd	Clivot et al. 2017		0.276	0.276	0.276	0.276	0.276	0.276	0.276	0.276	0.276	0.276	0.276	0.276	0.276	0.276	0.276	0.276	0.276	0.276	0.276	0.276	0.276	0.276	0.276	0.276	0.276	0.276	0.276	0.276	0.276	0.276	0.276	0.276	0.276	0.276
	Other protein crops	sd	Clivot et al. 2017		0.276	0.276	0.276	0.276	0.276	0.276	0.276	0.276	0.276	0.276	0.276	0.276	0.276	0.276	0.276	0.276	0.276	0.276	0.276	0.276	0.276	0.276	0.276	0.276	0.276	0.276	0.276	0.276	0.276	0.276	0.276	0.276	0.276	0.276
	Sugar beet	sd	Clivot et al. 2017		0.315	0.315	0.315	0.315	0.315	0.315	0.315	0.315	0.315	0.315	0.315	0.315	0.315	0.315	0.315	0.315	0.315	0.315	0.315	0.315	0.315	0.315	0.315	0.315	0.315	0.315	0.315	0.315	0.315	0.315	0.315	0.315	0.315	0.315
	Potatoes	sd	Clivot et al. 2017		0.238	0.238	0.238	0.238	0.238	0.238	0.238	0.238	0.238	0.238	0.238	0.238	0.238	0.238	0.238	0.238	0.238	0.238	0.238	0.238	0.238	0.238	0.238	0.238	0.238	0.238	0.238	0.238	0.238	0.238	0.238	0.238	0.238	0.238
	Other roots	sd	Clivot et al. 2017		0.289333	0.289333	0.289333	0.289333	0.289333	0.289333	0.289333	0.289333	0.289333	0.289333	0.289333	0.289333	0.289333	0.289333	0.289333	0.289333	0.289333	0.289333	0.289333	0.289333	0.289333	0.289333	0.289333	0.289333	0.289333	0.289333	0.289333	0.289333	0.289333	0.289333	0.289333	0.289333	0.289333	0.289333
	Green peas	sd	Clivot et al. 2017		0.276	0.276	0.276	0.276	0.276	0.276	0.276	0.276	0.276	0.276	0.276	0.276	0.276	0.276	0.276	0.276	0.276	0.276	0.276	0.276	0.276	0.276	0.276	0.276	0.276	0.276	0.276	0.276	0.276	0.276	0.276	0.276	0.276	0.276
	Dry beans	sd	Clivot et al. 2017		0.276	0.276	0.276	0.276	0.276	0.276	0.276	0.276	0.276	0.276	0.276	0.276	0.276	0.276	0.276	0.276	0.276	0.276	0.276	0.276	0.276	0.276	0.276	0.276	0.276	0.276	0.276	0.276	0.276	0.276	0.276	0.276	0.276	0.276
	Green beans	sd	Clivot et al. 2017		0.276	0.276	0.276	0.276	0.276	0.276	0.276	0.276	0.276	0.276	0.276	0.276	0.276	0.276	0.276	0.276	0.276	0.276	0.276	0.276	0.276	0.276	0.276	0.276	0.276	0.276	0.276	0.276	0.276	0.276	0.276	0.276	0.276	0.276
	Dry vegetables	sd	Clivot et al. 2017		0.276	0.276	0.276	0.276	0.276	0.276	0.276	0.276	0.276	0.276	0.276	0.276	0.276	0.276	0.276	0.276	0.276	0.276	0.276	0.276	0.276	0.276	0.276	0.276	0.276	0.276	0.276	0.276	0.276	0.276	0.276	0.276	0.276	0.276
	Dry fruits	sd	Clivot et al. 2017		0.276	0.276	0.276	0.276	0.276	0.276	0.276	0.276	0.276	0.276	0.276	0.276	0.276	0.276	0.276	0.276	0.276	0.276	0.276	0.276	0.276	0.276	0.276	0.276	0.276	0.276	0.276	0.276	0.276	0.276	0.276	0.276	0.276	0.276
	Squash and melons	sd	Clivot et al. 2017		0.254714	0.254714	0.254714	0.254714	0.254714	0.254714	0.254714	0.254714	0.254714	0.254714	0.254714	0.254714	0.254714	0.254714	0.254714	0.254714	0.254714	0.254714	0.254714	0.254714	0.254714	0.254714	0.254714	0.254714	0.254714	0.254714	0.254714	0.254714	0.254714	0.254714	0.254714	0.254714	0.254714	0.254714
	Cabbage	sd	Clivot et al. 2017		0.254714	0.254714	0.254714	0.254714	0.254714	0.254714	0.254714	0.254714	0.254714	0.254714	0.254714	0.254714	0.254714	0.254714	0.254714	0.254714	0.254714	0.254714	0.254714	0.254714	0.254714	0.254714	0.254714	0.254714	0.254714	0.254714	0.254714	0.254714	0.254714	0.254714	0.254714	0.254714	0.254714	0.254714
	Leaves vegetables	sd	Clivot et al. 2017		0.254714	0.254714	0.254714	0.254714	0.254714	0.254714	0.254714	0.254714	0.254714	0.254714	0.254714	0.254714	0.254714	0.254714	0.254714	0.254714	0.254714	0.254714	0.254714	0.254714	0.254714	0.254714	0.254714	0.254714	0.254714	0.254714	0.254714	0.254714	0.254714	0.254714	0.254714	0.254714	0.254714	0.254714
	Fruits	sd	Clivot et al. 2017		0.254714	0.254714	0.254714	0.254714	0.254714	0.254714	0.254714	0.254714	0.254714	0.254714	0.254714	0.254714	0.254714	0.254714	0.254714	0.254714	0.254714	0.254714	0.254714	0.254714	0.254714	0.254714	0.254714	0.254714	0.254714	0.254714	0.254714	0.254714	0.254714	0.254714	0.254714	0.254714	0.254714	0.254714
	Olives	sd	Clivot et al. 2017		0.254714	0.254714	0.254714	0.254714	0.254714	0.254714	0.254714	0.254714	0.254714	0.254714	0.254714	0.254714	0.254714	0.254714	0.254714	0.254714	0.254714	0.254714	0.254714	0.254714	0.254714	0.254714	0.254714	0.254714	0.254714	0.254714	0.254714	0.254714	0.254714	0.254714	0.254714	0.254714	0.254714	0.254714
	Citrus	sd	Clivot et al. 2017		0.254714	0.254714	0.254714	0.254714	0.254714	0.254714	0.254714	0.254714	0.254714	0.254714	0.254714	0.254714	0.254714	0.254714	0.254714	0.254714	0.254714	0.254714	0.254714	0.254714	0.254714	0.254714	0.254714	0.254714	0.254714	0.254714	0.254714	0.254714	0.254714	0.254714	0.254714	0.254714	0.254714	0.254714
	Hemp	sd	Clivot et al. 2017		0.254714	0.254714	0.254714	0.254714	0.254714	0.254714	0.254714	0.254714	0.254714	0.254714	0.254714	0.254714	0.254714	0.254714	0.254714	0.254714	0.254714	0.254714	0.254714	0.254714	0.254714	0.254714	0.254714	0.254714	0.254714	0.254714	0.254714	0.254714	0.254714	0.254714	0.254714	0.254714	0.254714	0.254714
	Flax	sd	Clivot et al. 2017		0.254714	0.254714	0.254714	0.254714	0.254714	0.254714	0.254714	0.254714	0.254714	0.254714	0.254714	0.254714	0.254714	0.254714	0.254714	0.254714	0.254714	0.254714	0.254714	0.254714	0.254714	0.254714	0.254714	0.254714	0.254714	0.254714	0.254714	0.254714	0.254714	0.254714	0.254714	0.254714	0.254714	0.254714
	Forage maize	sd	Clivot et al. 2017		0.233	0.233	0.233	0.233	0.233	0.233	0.233	0.233	0.233	0.233	0.233	0.233	0.233	0.233	0.233	0.233	0.233	0.233	0.233	0.233	0.233	0.233	0.233	0.233	0.233	0.233	0.233	0.233	0.233	0.233	0.233	0.233	0.233	0.233
	Forage cabbages	sd	Clivot et al. 2017		0.254714	0.254714	0.254714	0.254714	0.254714	0.254714	0.254714	0.254714	0.254714	0.254714	0.254714	0.254714	0.254714	0.254714	0.254714	0.254714	0.254714	0.254714	0.254714	0.254714	0.254714	0.254714	0.254714	0.254714	0.254714	0.254714	0.254714	0.254714	0.254714	0.254714	0.254714	0.254714	0.254714	0.254714
	Alfalfa and clover	sd	Clivot et al. 2017		0.257	0.257	0.257	0.257	0.257	0.257	0.257	0.257	0.257	0.257	0.257	0.257	0.257	0.257	0.257	0.257	0.257	0.257	0.257	0.257	0.257	0.257	0.257	0.257	0.257	0.257	0.257	0.257	0.257	0.257	0.257	0.257	0.257	0.257
	Non-legume temporary meadow	sd	Clivot et al. 2017		0.238	0.238	0.238	0.238	0.238	0.238	0.238	0.238	0.238	0.238	0.238	0.238	0.238	0.238	0.238	0.238	0.238	0.238	0.238	0.238	0.238	0.238	0.238	0.238	0.238	0.238	0.238	0.238	0.238	0.238	0.238	0.238	0.238	0.238
	Natural meadow	sd	Clivot et al. 2017		0.2475	0.2475	0.2475	0.2475	0.2475	0.2475	0.2475	0.2475	0.2475	0.2475	0.2475	0.2475	0.2475	0.2475	0.2475	0.2475	0.2475	0.2475	0.2475	0.2475	0.2475	0.2475	0.2475	0.2475	0.2475	0.2475	0.2475	0.2475	0.2475	0.2475	0.2475	0.2475	0.2475	0.2475
	Weed	sd	Clivot et al. 2017		0.2475	0.2475	0.2475	0.2475	0.2475	0.2475	0.2475	0.2475	0.2475	0.2475	0.2475	0.2475	0.2475	0.2475	0.2475	0.2475	0.2475	0.2475	0.2475	0.2475	0.2475	0.2475	0.2475	0.2475	0.2475	0.2475	0.2475	0.2475	0.2475	0.2475	0.2475	0.2475	0.2475	0.2475
	Efficient inputs from above ground
	Efficient inputs from above ground of cereals	ktonC/yr			443.366	230.802	255.83	827.759	194.963	107.295	32.2169	369.678	701.668	298.044	329.194	284.834	293.261	403.926	561.28	1168.67	449.748	46.5783	8.82897	103.885	26.9594	124.893	16.5529	1002.74	63.4144	260.524	130.626	87.2071	11.223	38.7728	101.956	44.6099	2.94984	9024.26
	Efficient inputs from above ground of rapeseed	ktonC/yr			103.603	114.636	84.957	147.455	62.5952	20.6982	15.0651	91.0685	194.465	153.582	133.948	14.4002	31.498	46.4554	133.148	301.827	67.3497	6.9524	1.37775	6.2409	5.72065	7.57467	7.9604	64.4672	1.13057	2.5837	0.722171	4.88478	0.200068	0.958863	3.73105	1.11383	0	1832.37
	Efficient inputs from above ground of sunflower	ktonC/yr			2.42125	0.232194	0.398285	0.62907	0.770141	0.0127985	0	3.54789	10.1178	8.2684	2.77881	0.31613	6.78854	44.2136	34.7706	63.6777	14.649	1.46142	0.508714	2.18171	4.70664	6.07101	17.6676	162.831	2.34641	1.81083	1.59917	8.54843	0.439762	2.73139	9.14771	1.67711	0.019106	417.34
	Efficient inputs from above ground of soybean	ktonC/yr			0.0313459	0.00505136	0.00460164	0.00830791	0	0	0	0.0176726	0.404818	2.51333	0.758249	0.845231	0.0161778	0.12287	0.145283	0.85442	3.02877	1.44451	0.26756	1.01168	0.839179	1.07011	1.60733	26.9067	0.314525	1.08287	0.279526	0.406208	0.00677414	0.0328113	0.182173	0.0107342	0	44.2189
	Efficient inputs from above ground of other oil crops	ktonC/yr			0.345665	0.471467	0.372855	0.855288	0.12906	0.0205823	0.00865236	0.160671	0.642697	1.37859	0.183634	0.0798084	0.589626	0.701802	1.28551	1.93533	0.264258	0.0057367	0	0.00557693	0.0297401	0.00483507	0.114278	0.37392	0.0249458	0.0124963	0.0138285	0.0350739	0.00469355	0.00975322	0.028562	0.00196937	0.00230154	10.0932
	Efficient inputs from above ground of horse beans and faba beans	ktonC/yr			9.00259	2.14671	0.275085	12.5747	2.43101	1.24455	0.126605	3.70829	2.68541	0.340322	0.44517	0.0187797	0.441537	0.384524	0.994032	1.39913	0.28689	0.0477376	0.000816122	0.0137302	0.0547961	0.0243344	0.00308884	2.17061	0.036827	0.0847619	0.0111546	0.131795	0.00242527	0.0265684	0.0318566	0.0107031	0.00373309	41.1603
	Efficient inputs from above ground of peas	ktonC/yr			9.5408	6.33867	4.30229	16.4307	5.57465	1.24415	0.164993	3.73072	10.4876	2.00225	1.50855	0.0508975	1.34583	3.30923	4.33825	8.12663	1.38565	0.0387906	0.0170357	0.163129	0.539639	0.59674	0.0271036	4.60318	0.0583005	0.0651447	0.0314083	0.102456	0.00928832	0.114414	0.335777	0.151875	0.029238	86.7654
	Efficient inputs from above ground of other protein crops	ktonC/yr			0.03881	0.015407	0.0395515	0.0150368	0.0293678	0.00577335	0.0114964	0.000629139	0.00361786	0.00306581	0.0109009	0.00525672	0.132984	0.108686	0.374112	0.317361	0.0763722	0.0068857	0.000543768	0.0149091	0.000930241	0.012285	0.00265342	0.0500283	0.00541164	0.0483431	0.0029946	0.0296848	0.00148159	0	0	0.000207246	0	1.36479
	Efficient inputs from above ground of sugar beet	ktonC/yr			30.1491	8.85869	3.71051	106.699	7.78102	5.49226	0.0311316	44.7694	51.0223	1.04201	0.0520427	5.11205	0.0178544	0.0104164	0.344867	15.314	3.8981	0.165873	0	0	0	0	0	0.0252119	0.00220067	0	0.0118944	0.0158634	0	0	0	0	0	284.526
	Efficient inputs from above ground of potatoes	ktonC/yr			0.861806	0.711112	1.03585	10.2717	0.220957	1.24514	0.0943484	11.2274	3.09287	0.131394	0.0601501	0.265594	1.01657	0.109334	0.0669491	0.917815	0.191413	0.0064429	0.02653	0.0713534	0.0670902	0.0612091	0.0192488	0.215104	0.0896563	0.00857313	0.0464549	0.0126811	0.0111589	0.0920956	0.299568	0.0919236	0.231082	32.8706
	Efficient inputs from above ground of other roots	ktonC/yr			1.413e-12	1.68443e-12	7.97126e-13	1.27446e-12	1.53009e-12	8.03454e-13	1.6486e-12	1.43298e-12	9.29363e-13	1.3737e-12	9.62359e-13	1.34078e-12	8.39636e-13	9.61256e-13	1.13514e-12	1.26521e-12	1.38254e-12	9.10064e-13	7.28548e-13	8.4684e-13	2.54256e-12	1.05298e-12	9.08364e-13	1.77906e-12	1.3555e-12	1.80795e-12	7.69258e-13	1.35741e-12	1.37738e-12	1.36959e-12	8.05806e-12	1.49065e-12	9.52338e-12	5.66517e-11
	Efficient inputs from above ground of green peas	ktonC/yr			0.00702059	0.000868303	0.0490442	0.657635	0.000535313	0.000148847	0.000991469	1.41816	0.00511685	0.0153162	0.00030504	0.000623978	0.531804	0.0169743	0.0047199	0.0238987	0.0246388	0.0175227	0.00012343	0.00179163	0.000241644	0.00213367	2.61182e-05	0.0440312	0.00880337	0.0135024	0.034818	0.00150393	0.000101737	0.00199705	0.0107744	0.00357053	0.00205615	2.9008
	Efficient inputs from above ground of dry beans	ktonC/yr			0.153817	0.0127792	0.193412	0.967154	0.00127861	0.00120288	0.00248989	0.579531	0.0366669	0.0101725	0.00033238	0.00113022	1.33828	0.0607656	0.0463239	0.0577219	0.0395114	0.0259472	0	0.000931975	0.000703262	0.00574028	0	0.0353778	0.0553761	0.107733	0.0189245	0.00232425	0.000618841	0.015656	0.0621832	0.0103776	0.00685712	3.85132
	Efficient inputs from above ground of green beans	ktonC/yr			0.0725307	0.00367013	0.0637952	0.69027	0.00185752	0.00127253	0.00567491	0.820495	0.00132954	0.0316418	0.00153001	0.0039574	0.891603	0.0347514	0.0724799	0.0511807	0.0460726	0.0317554	0.00236799	0.00924685	0.00198437	0.00436597	0.00027338	0.15102	0.330526	0.190096	0.327678	0.0105441	0.00125713	0.0146061	0.071546	0.00811248	0.00836234	3.95785
	Efficient inputs from above ground of dry vegetables	ktonC/yr			0.0221967	0.00233201	0.0321274	0.016583	0	0	9.65072e-05	0.166606	0.322936	0.0240078	0.00446318	0.000176598	0	0.22514	0.0545222	0.65985	0.442492	0	0	9.66676e-05	0.013589	0.0143469	0.00290334	0.532148	0.000712163	0.0298192	0.00373424	0.00279903	0.00535388	0.00203242	0	0.306534	0.00529615	2.89289
	Efficient inputs from above ground of dry fruits	ktonC/yr			0.01048	0.00241336	0	0.000100718	0.00582205	0	0.000709328	0.000106954	0.00623877	0	0.00273227	0.00350448	0.000808542	0.1687	0.0525121	0.0518634	0.0428822	0.000827083	0.00788143	0.00201763	0.0400041	2.00138	0.0407837	1.10623	0.0532396	0.0440355	0.00577305	1.51273	0.215209	0.0342264	0.0725255	0.076105	0.0742436	5.63608
	Efficient inputs from above ground of squash and melons	ktonC/yr			0.0356488	0.00521725	0.00177225	0.00617192	0.00260231	0.00658507	0.00726572	0.0809768	0.0455979	0.0113365	0.04326	0.016984	0.0545418	0.116941	0.241691	0.314515	0.0149106	0.000915262	0.00645953	0.0275871	0.156401	0.0746462	0.000241409	0.612305	0.0210679	0.0184481	0.00419032	0.0549969	0.00254488	0.680733	1.25685	0.391929	0.48261	4.79794
	Efficient inputs from above ground of cabbage	ktonC/yr			0.022836	0.00478997	0.001246	0.00362152	0.00873087	0.00515202	0.119811	0.254202	0.0313025	0.00676505	0.00144439	0.169812	0.628587	0.0110345	0.0321766	0.0145991	0.00626528	0.000964669	0.00153216	0.0147906	0.00157543	0.00709982	0.000230847	0.0356755	0.000935636	0.00810462	0.0010334	0.000726326	0.000298036	0.0292974	0.151296	0.0040448	0.00929191	1.58927
	Efficient inputs from above ground of leaves vegetables	ktonC/yr			0.136051	0.0134591	0.00632694	0.634605	0.0381687	0.014165	0.189414	1.37301	0.0544808	0.0184247	0.00447348	0.0278798	0.291253	0.0329118	0.241215	0.115129	0.0420279	0.00148538	0.00805026	0.0935312	0.036834	0.0321823	0.00117067	0.162608	0.0245829	0.0155133	0.00829339	0.00844374	0.00208625	0.345658	1.35268	0.0910241	1.20394	6.62108
	Efficient inputs from above ground of fruits	ktonC/yr			0.0766158	0.171518	0.0240816	0.246904	0.508868	0.0623092	0.136879	0.108078	0.0487136	0.00975833	0.0787479	0.114358	0.187112	0.125803	1.50017	0.59159	0.27955	0.00252185	0.0653825	0.113877	1.54196	0.835954	0.00595444	3.6621	0.121827	0.0936538	0.0458242	0.500726	0.303269	2.13431	5.89452	1.0724	3.732	24.3973
	Efficient inputs from above ground of olives	ktonC/yr			0	0	0	0	0	0	0	0	0	0	0	0	0	5.57933e-06	0	0	0	0	0	0	0.0157809	0.00780352	0	0.00593934	0	0	0	0	0	0.0528333	0.294941	0.0362942	0.022222	0.43582
	Efficient inputs from above ground of citrus	ktonC/yr			0	0	0	0	0	0	0	0	0	0	0	0	0	0	0	0	0	0	0	0	0	0	0	0	0	0	0	0	0	0	0.00643168	0	0	0.00643168
	Efficient inputs from above ground of hemp	ktonC/yr			0.0558071	0.0288751	0.00114849	0	0.0123742	0.000125771	0	0	0.510494	0.0453165	0.0824912	0.000943292	0.00985983	0.0186121	0.202568	0.0185373	0.00300314	0.0205326	0	0	0	0.00135693	0.000443355	0.166377	0	0.024541	0	0.00738927	0.000254375	0	0	0.00128732	0	1.21234
	Efficient inputs from above ground of flax	ktonC/yr			0.272119	2.78959	0.0311715	1.45819	1.16556	2.19979	0.000388551	2.03186	0.0461914	0.000595978	0.00169265	0	0.000448208	0	0	0.00390877	0	0	0	0	0	0	0.000319535	0.0065711	0	0	0	0.000176674	0	0	0	0	0	10.0086
	Efficient inputs from above ground of forage maize	ktonC/yr			1.79142	8.52329	1.49509	37.464	73.1361	21.8515	51.6997	58.0446	15.6314	17.9946	50.1153	11.2222	159.985	50.7787	173.378	23.9818	65.6139	5.06293	1.25805	11.5181	1.0391	7.82494	7.56735	37.1548	3.22243	34.5086	3.71865	14.4788	6.10687	0.68381	3.02608	0.275292	0.572044	960.725
	Efficient inputs from above ground of forage cabbages	ktonC/yr			0.0326424	0.0258696	0.0141991	0.0676755	0.0513795	0.0130438	0.0296491	0.0470539	0.0612904	0.042123	0.0539452	0.0178103	0.0564013	0.0492557	0.0992652	0.121367	0.162232	0.0166523	0.0075681	0.0138386	0.0411401	0.0274754	0.0276182	0.145915	0.0144815	0.0469497	0.00658038	0.0323835	0.0323048	0.014948	0.0703849	0.0223444	0.0499448	1.51573
	Efficient inputs from above ground of alfalfa and clover	ktonC/yr			0.434713	0.850321	0.0924395	1.28662	0.423157	0.0612901	0.319637	0.338899	11.8444	1.79533	1.12042	0.291109	0.592511	2.01265	2.69194	2.80474	3.60896	0.254348	0.158435	0.456979	4.39567	2.47862	1.65701	9.42571	0.153832	0.548783	0.0170435	2.09404	0.212019	0.803554	3.64747	0.687921	0.383674	57.9442
	Efficient inputs from above ground of non-legume temporary meadow	ktonC/yr			0.79817	1.90104	0.530865	2.97342	13.3213	2.87095	20.5185	3.62011	2.80601	4.66712	8.49307	2.38287	68.681	33.2522	89.4599	40.0684	95.0212	8.09899	2.18706	6.28303	5.87211	4.48725	28.7216	47.7128	1.21123	27.6425	1.58378	19.4106	18.7238	0.592132	1.6952	0.981754	0.273849	566.844
	Efficient inputs from above ground of natural meadow	ktonC/yr			0	2.83181e-10	0	0	34.02	16.8871	23.1411	0	0	0	72.5409	0	16.2964	27.9856	44.5062	0	194.882	34.6354	17.8167	23.1022	17.7727	21.9981	31.3268	42.6002	0	24.512	0	23.4814	45.1102	0	0	0	0	712.615
	Efficient inputs from above ground of weed	ktonC/yr			0.0250254	0.0158033	0.0117174	0.0628945	0.0223312	0.00844879	0.012167	0.0362667	0.0422406	0.0179607	0.0214575	0.0141081	0.0424265	0.0296297	0.0583663	0.0703207	0.0499623	0.00468431	0.00118224	0.00640707	0.00395812	0.00751206	0.00997169	0.0605428	0.00295384	0.0196466	0.00528761	0.0104619	0.00609205	0.00261327	0.00780796	0.00245374	0.0017207	0.694422
	Total efficient inputs from above ground residue to cropland	ktonC/yr			603.307	378.569	353.475	1169.23	363.194	164.354	120.763	596.83	1006.08	491.995	528.964	320.196	568.401	586.276	1004.88	1631.99	706.276	70.2482	14.732	132.131	52.0791	158.121	81.9905	1365.4	72.6452	329.532	139.126	139.503	37.5107	48.1471	133.334	51.6397	10.0634	13431
	Total efficient inputs from above ground residue to permanent grassland	ktonC/yr			0	2.83181e-10	0	0	34.02	16.8871	23.1411	0	0	0	72.5409	0	16.2964	27.9856	44.5062	0	194.882	34.6354	17.8167	23.1022	17.7727	21.9981	31.3268	42.6002	0	24.512	0	23.4814	45.1102	0	0	0	0	712.615
	Humification coeff for below-ground part (efficient fraction remaining after 1 yr)
	Wheat	Sd	Clivot et al. 2017		0.4	0.4	0.4	0.4	0.4	0.4	0.4	0.4	0.4	0.4	0.4	0.4	0.4	0.4	0.4	0.4	0.4	0.4	0.4	0.4	0.4	0.4	0.4	0.4	0.4	0.4	0.4	0.4	0.4	0.4	0.4	0.4	0.4	0.4
	Rye	Sd	Clivot et al. 2017		0.4	0.4	0.4	0.4	0.4	0.4	0.4	0.4	0.4	0.4	0.4	0.4	0.4	0.4	0.4	0.4	0.4	0.4	0.4	0.4	0.4	0.4	0.4	0.4	0.4	0.4	0.4	0.4	0.4	0.4	0.4	0.4	0.4	0.4
	Barley	Sd	Clivot et al. 2017		0.4	0.4	0.4	0.4	0.4	0.4	0.4	0.4	0.4	0.4	0.4	0.4	0.4	0.4	0.4	0.4	0.4	0.4	0.4	0.4	0.4	0.4	0.4	0.4	0.4	0.4	0.4	0.4	0.4	0.4	0.4	0.4	0.4	0.4
	Oat	Sd	Clivot et al. 2017		0.4	0.4	0.4	0.4	0.4	0.4	0.4	0.4	0.4	0.4	0.4	0.4	0.4	0.4	0.4	0.4	0.4	0.4	0.4	0.4	0.4	0.4	0.4	0.4	0.4	0.4	0.4	0.4	0.4	0.4	0.4	0.4	0.4	0.4
	Grain maize	Sd	Clivot et al. 2017		0.4	0.4	0.4	0.4	0.4	0.4	0.4	0.4	0.4	0.4	0.4	0.4	0.4	0.4	0.4	0.4	0.4	0.4	0.4	0.4	0.4	0.4	0.4	0.4	0.4	0.4	0.4	0.4	0.4	0.4	0.4	0.4	0.4	0.4
	Rice	Sd	Clivot et al. 2017		0.4	0.4	0.4	0.4	0.4	0.4	0.4	0.4	0.4	0.4	0.4	0.4	0.4	0.4	0.4	0.4	0.4	0.4	0.4	0.4	0.4	0.4	0.4	0.4	0.4	0.4	0.4	0.4	0.4	0.4	0.4	0.4	0.4	0.4
	Other cereals	Sd	Clivot et al. 2017		0.4	0.4	0.4	0.4	0.4	0.4	0.4	0.4	0.4	0.4	0.4	0.4	0.4	0.4	0.4	0.4	0.4	0.4	0.4	0.4	0.4	0.4	0.4	0.4	0.4	0.4	0.4	0.4	0.4	0.4	0.4	0.4	0.4	0.4
	Rapeseed	sd	Clivot et al. 2017		0.4	0.4	0.4	0.4	0.4	0.4	0.4	0.4	0.4	0.4	0.4	0.4	0.4	0.4	0.4	0.4	0.4	0.4	0.4	0.4	0.4	0.4	0.4	0.4	0.4	0.4	0.4	0.4	0.4	0.4	0.4	0.4	0.4	0.4
	Sunflower	sd	Clivot et al. 2017		0.4	0.4	0.4	0.4	0.4	0.4	0.4	0.4	0.4	0.4	0.4	0.4	0.4	0.4	0.4	0.4	0.4	0.4	0.4	0.4	0.4	0.4	0.4	0.4	0.4	0.4	0.4	0.4	0.4	0.4	0.4	0.4	0.4	0.4
	Soybean	sd	Clivot et al. 2017		0.4	0.4	0.4	0.4	0.4	0.4	0.4	0.4	0.4	0.4	0.4	0.4	0.4	0.4	0.4	0.4	0.4	0.4	0.4	0.4	0.4	0.4	0.4	0.4	0.4	0.4	0.4	0.4	0.4	0.4	0.4	0.4	0.4	0.4
	Other oil crops	sd	Clivot et al. 2017		0.4	0.4	0.4	0.4	0.4	0.4	0.4	0.4	0.4	0.4	0.4	0.4	0.4	0.4	0.4	0.4	0.4	0.4	0.4	0.4	0.4	0.4	0.4	0.4	0.4	0.4	0.4	0.4	0.4	0.4	0.4	0.4	0.4	0.4
	Horse beans and faba beans	sd	Clivot et al. 2017		0.4	0.4	0.4	0.4	0.4	0.4	0.4	0.4	0.4	0.4	0.4	0.4	0.4	0.4	0.4	0.4	0.4	0.4	0.4	0.4	0.4	0.4	0.4	0.4	0.4	0.4	0.4	0.4	0.4	0.4	0.4	0.4	0.4	0.4
	Peas	sd	Clivot et al. 2017		0.4	0.4	0.4	0.4	0.4	0.4	0.4	0.4	0.4	0.4	0.4	0.4	0.4	0.4	0.4	0.4	0.4	0.4	0.4	0.4	0.4	0.4	0.4	0.4	0.4	0.4	0.4	0.4	0.4	0.4	0.4	0.4	0.4	0.4
	Other protein crops	sd	Clivot et al. 2017		0.4	0.4	0.4	0.4	0.4	0.4	0.4	0.4	0.4	0.4	0.4	0.4	0.4	0.4	0.4	0.4	0.4	0.4	0.4	0.4	0.4	0.4	0.4	0.4	0.4	0.4	0.4	0.4	0.4	0.4	0.4	0.4	0.4	0.4
	Sugar beet	sd	Clivot et al. 2017		0.4	0.4	0.4	0.4	0.4	0.4	0.4	0.4	0.4	0.4	0.4	0.4	0.4	0.4	0.4	0.4	0.4	0.4	0.4	0.4	0.4	0.4	0.4	0.4	0.4	0.4	0.4	0.4	0.4	0.4	0.4	0.4	0.4	0.4
	Potatoes	sd	Clivot et al. 2017		0.4	0.4	0.4	0.4	0.4	0.4	0.4	0.4	0.4	0.4	0.4	0.4	0.4	0.4	0.4	0.4	0.4	0.4	0.4	0.4	0.4	0.4	0.4	0.4	0.4	0.4	0.4	0.4	0.4	0.4	0.4	0.4	0.4	0.4
	Other roots	sd	Clivot et al. 2017		0.4	0.4	0.4	0.4	0.4	0.4	0.4	0.4	0.4	0.4	0.4	0.4	0.4	0.4	0.4	0.4	0.4	0.4	0.4	0.4	0.4	0.4	0.4	0.4	0.4	0.4	0.4	0.4	0.4	0.4	0.4	0.4	0.4	0.4
	Green peas	sd	Clivot et al. 2017		0.4	0.4	0.4	0.4	0.4	0.4	0.4	0.4	0.4	0.4	0.4	0.4	0.4	0.4	0.4	0.4	0.4	0.4	0.4	0.4	0.4	0.4	0.4	0.4	0.4	0.4	0.4	0.4	0.4	0.4	0.4	0.4	0.4	0.4
	Dry beans	sd	Clivot et al. 2017		0.4	0.4	0.4	0.4	0.4	0.4	0.4	0.4	0.4	0.4	0.4	0.4	0.4	0.4	0.4	0.4	0.4	0.4	0.4	0.4	0.4	0.4	0.4	0.4	0.4	0.4	0.4	0.4	0.4	0.4	0.4	0.4	0.4	0.4
	Green beans	sd	Clivot et al. 2017		0.4	0.4	0.4	0.4	0.4	0.4	0.4	0.4	0.4	0.4	0.4	0.4	0.4	0.4	0.4	0.4	0.4	0.4	0.4	0.4	0.4	0.4	0.4	0.4	0.4	0.4	0.4	0.4	0.4	0.4	0.4	0.4	0.4	0.4
	Dry vegetables	sd	Clivot et al. 2017		0.4	0.4	0.4	0.4	0.4	0.4	0.4	0.4	0.4	0.4	0.4	0.4	0.4	0.4	0.4	0.4	0.4	0.4	0.4	0.4	0.4	0.4	0.4	0.4	0.4	0.4	0.4	0.4	0.4	0.4	0.4	0.4	0.4	0.4
	Dry fruits	sd	Clivot et al. 2017		0.4	0.4	0.4	0.4	0.4	0.4	0.4	0.4	0.4	0.4	0.4	0.4	0.4	0.4	0.4	0.4	0.4	0.4	0.4	0.4	0.4	0.4	0.4	0.4	0.4	0.4	0.4	0.4	0.4	0.4	0.4	0.4	0.4	0.4
	Squash and melons	sd	Clivot et al. 2017		0.4	0.4	0.4	0.4	0.4	0.4	0.4	0.4	0.4	0.4	0.4	0.4	0.4	0.4	0.4	0.4	0.4	0.4	0.4	0.4	0.4	0.4	0.4	0.4	0.4	0.4	0.4	0.4	0.4	0.4	0.4	0.4	0.4	0.4
	Cabbage	sd	Clivot et al. 2017		0.4	0.4	0.4	0.4	0.4	0.4	0.4	0.4	0.4	0.4	0.4	0.4	0.4	0.4	0.4	0.4	0.4	0.4	0.4	0.4	0.4	0.4	0.4	0.4	0.4	0.4	0.4	0.4	0.4	0.4	0.4	0.4	0.4	0.4
	Leaves vegetables	sd	Clivot et al. 2017		0.4	0.4	0.4	0.4	0.4	0.4	0.4	0.4	0.4	0.4	0.4	0.4	0.4	0.4	0.4	0.4	0.4	0.4	0.4	0.4	0.4	0.4	0.4	0.4	0.4	0.4	0.4	0.4	0.4	0.4	0.4	0.4	0.4	0.4
	Fruits	sd	Clivot et al. 2017		0.4	0.4	0.4	0.4	0.4	0.4	0.4	0.4	0.4	0.4	0.4	0.4	0.4	0.4	0.4	0.4	0.4	0.4	0.4	0.4	0.4	0.4	0.4	0.4	0.4	0.4	0.4	0.4	0.4	0.4	0.4	0.4	0.4	0.4
	Olives	sd	Clivot et al. 2017		0.4	0.4	0.4	0.4	0.4	0.4	0.4	0.4	0.4	0.4	0.4	0.4	0.4	0.4	0.4	0.4	0.4	0.4	0.4	0.4	0.4	0.4	0.4	0.4	0.4	0.4	0.4	0.4	0.4	0.4	0.4	0.4	0.4	0.4
	Citrus	sd	Clivot et al. 2017		0.4	0.4	0.4	0.4	0.4	0.4	0.4	0.4	0.4	0.4	0.4	0.4	0.4	0.4	0.4	0.4	0.4	0.4	0.4	0.4	0.4	0.4	0.4	0.4	0.4	0.4	0.4	0.4	0.4	0.4	0.4	0.4	0.4	0.4
	Hemp	sd	Clivot et al. 2017		0.4	0.4	0.4	0.4	0.4	0.4	0.4	0.4	0.4	0.4	0.4	0.4	0.4	0.4	0.4	0.4	0.4	0.4	0.4	0.4	0.4	0.4	0.4	0.4	0.4	0.4	0.4	0.4	0.4	0.4	0.4	0.4	0.4	0.4
	Flax	sd	Clivot et al. 2017		0.4	0.4	0.4	0.4	0.4	0.4	0.4	0.4	0.4	0.4	0.4	0.4	0.4	0.4	0.4	0.4	0.4	0.4	0.4	0.4	0.4	0.4	0.4	0.4	0.4	0.4	0.4	0.4	0.4	0.4	0.4	0.4	0.4	0.4
	Forage maize	sd	Clivot et al. 2017		0.4	0.4	0.4	0.4	0.4	0.4	0.4	0.4	0.4	0.4	0.4	0.4	0.4	0.4	0.4	0.4	0.4	0.4	0.4	0.4	0.4	0.4	0.4	0.4	0.4	0.4	0.4	0.4	0.4	0.4	0.4	0.4	0.4	0.4
	Forage cabbages	sd	Clivot et al. 2017		0.4	0.4	0.4	0.4	0.4	0.4	0.4	0.4	0.4	0.4	0.4	0.4	0.4	0.4	0.4	0.4	0.4	0.4	0.4	0.4	0.4	0.4	0.4	0.4	0.4	0.4	0.4	0.4	0.4	0.4	0.4	0.4	0.4	0.4
	Alfalfa and clover	sd	Clivot et al. 2017		0.4	0.4	0.4	0.4	0.4	0.4	0.4	0.4	0.4	0.4	0.4	0.4	0.4	0.4	0.4	0.4	0.4	0.4	0.4	0.4	0.4	0.4	0.4	0.4	0.4	0.4	0.4	0.4	0.4	0.4	0.4	0.4	0.4	0.4
	Non-legume temporary meadow	sd	Clivot et al. 2017		0.4	0.4	0.4	0.4	0.4	0.4	0.4	0.4	0.4	0.4	0.4	0.4	0.4	0.4	0.4	0.4	0.4	0.4	0.4	0.4	0.4	0.4	0.4	0.4	0.4	0.4	0.4	0.4	0.4	0.4	0.4	0.4	0.4	0.4
	Natural meadow	sd	Clivot et al. 2017		0.4	0.4	0.4	0.4	0.4	0.4	0.4	0.4	0.4	0.4	0.4	0.4	0.4	0.4	0.4	0.4	0.4	0.4	0.4	0.4	0.4	0.4	0.4	0.4	0.4	0.4	0.4	0.4	0.4	0.4	0.4	0.4	0.4	0.4
	Weed	sd	Clivot et al. 2017		0.4	0.4	0.4	0.4	0.4	0.4	0.4	0.4	0.4	0.4	0.4	0.4	0.4	0.4	0.4	0.4	0.4	0.4	0.4	0.4	0.4	0.4	0.4	0.4	0.4	0.4	0.4	0.4	0.4	0.4	0.4	0.4	0.4	0.4
	Efficient inputs from below ground
	Efficient inputs from below-ground of wheat	ktonC/yr			32.1967	22.0367	26.7213	79.2333	26.8235	18.0815	5.90367	44.9858	61.6921	23.2293	31.3061	4.93739	31.1573	28.4347	48.3462	96.9229	26.9345	2.48589	0.162452	3.64025	1.73049	5.56192	0.962421	45.6773	0.928275	0.848704	0.228668	3.50724	0.74421	4.16342	2.31377	10.4555	0.722912	693.077
	Efficient inputs from below-ground of rye	ktonC/yr			0.0535053	0.00511213	0.196406	0.0494378	0.0266182	0.0039442	0.000787631	0.0125775	0.0462823	0.0759623	0.0844928	0.00827055	0.0233447	0.0285991	0.102205	0.359881	0.422358	0.0483882	0.00184193	0.0290397	0.0166563	0.0572877	0.0824221	0.0252195	0.00538119	0.00203301	0.00394496	0.0162457	0.0679649	0.00917385	0.00267846	0.00188484	0.059614	1.92956
	Efficient inputs from below-ground of barley	ktonC/yr			5.62607	2.48596	4.64001	8.56803	2.91075	2.4936	0.474204	6.13928	20.9228	9.50485	12.3609	0.28728	4.32556	3.30876	3.56454	17.4693	5.47943	0.735421	0.0531939	0.570588	0.391568	1.04533	1.28481	4.05059	0.0942227	0.121856	0.0261306	0.944362	0.141337	0.155369	0.0712029	0.325421	0.0300419	120.603
	Efficient inputs from below-ground of ceoat	ktonC/yr			0.830103	0.274329	0.319832	0.990122	2.10606	0.252687	0.143949	0.882692	1.13229	0.903106	0.975567	0.108274	2.22559	0.454135	1.57074	2.37384	1.61238	0.139301	0.00648377	0.145872	0.165447	0.19907	0.289779	1.03901	0.0921086	0.0439296	0.0204768	0.348574	0.084567	0.039574	0.0310257	0.104761	0.22167	20.1273
	Efficient inputs from below-ground of grain maize	ktonC/yr			7.04162	1.08541	4.00819	7.48266	1.94454	0.42318	1.04399	2.66963	6.18203	3.30693	4.9238	24.5823	16.4477	23.3234	16.9762	29.3807	15.3068	2.21982	0.480665	9.09757	0.72901	10.2315	0.168928	39.2668	9.84047	24.5761	22.0088	5.69338	0.458988	1.0385	0.937218	0.420931	0.153636	293.451
	Efficient inputs from below-ground of rice	ktonC/yr			0	0	0	0	0	0	0	0	0	0	0	0	0	0	0	0	0	0	0	0	0	0	0	0	0	0	0	0	0	4.77458	0.509828	0.191894	0	5.4763
	Efficient inputs from below-ground of other cereals	ktonC/yr			0.192394	0.0749558	0.158606	0.202101	0.851264	0.110452	0.289311	0.313913	0.44445	0.812151	1.43849	0.217091	4.35003	1.32256	4.85186	4.24133	7.66266	0.334063	0.0391785	0.526726	0.305576	1.0455	1.74858	4.66015	0.163736	0.430484	0.130128	1.42666	0.930097	0.224968	0.213447	0.35703	0.17549	40.2454
	Efficient inputs from below-ground of rapeseed	ktonC/yr			15.3447	17.1287	20.6202	19.1466	11.8347	5.09123	2.32649	13.9132	31.7459	26.763	26.2447	1.81162	6.36817	7.67516	21.7151	62.8415	9.98321	1.03938	0.120782	1.02482	0.750712	1.38503	1.67932	8.26315	0.261347	0.265439	0.145346	0.741211	0.0408841	0.401417	0.3968	0.398402	0	317.468
	Efficient inputs from below-ground of sunflower	ktonC/yr			0.0661053	0.00384314	0.0155409	0.0104107	0.0124343	0.000183363	0	0.0293847	0.403638	0.322956	0.0847341	0.00599692	0.122781	1.46916	1.12131	1.94767	0.484577	0.0365057	0.00337081	0.0488023	0.124724	0.215016	0.513442	3.43497	0.0802191	0.0326483	0.0581188	0.215979	0.00967409	0.215415	0.12712	0.116888	0.00087891	11.3345
	Efficient inputs from below-ground of soybean	ktonC/yr			0.000719035	0.000123661	0.000240604	0.000292002	0	0	0	0.000639483	0.0226346	0.153524	0.0528966	0.0378655	9.9871e-05	0.00647333	0.00652213	0.0446981	0.176063	0.0684898	0.00840812	0.0571822	0.0353184	0.0704612	0.10762	1.08862	0.0218118	0.0426487	0.0212551	0.0205246	0.000116261	0.00396561	0.00569988	0.00112957	0	2.05605
	Efficient inputs from below-ground of other oil crops	ktonC/yr			0.00837002	0.0106038	0.0127803	0.0174854	0.00141786	0.000524555	7.69888e-05	0.00219811	0.0248902	0.0341057	0.00583292	0.000181967	0.0652104	0.0475794	0.0915788	0.0559284	0.0178336	0.000792718	0	2.4841e-05	0.00029803	0.000229544	0.00061539	0.0051505	0.000451517	0.000171166	0.000222535	0.000777074	1.36659e-05	0.0001978	0.000340637	2.8725e-05	7.98042e-06	0.40592
	Efficient inputs from below-ground of horse beans and faba beans	ktonC/yr			2.15687	0.506668	0.0923578	2.63178	0.617225	0.484873	0.0318412	0.966721	0.738922	0.0774306	0.149846	0.00367998	0.1278	0.232697	0.234349	0.306612	0.072529	0.0166744	9.27852e-05	0.00290288	0.00916104	0.00542823	0.000699003	0.283923	0.00903114	0.00923378	0.00276193	0.0247788	0.00059975	0.0128989	0.00503463	0.0052287	0.00174505	9.8224
	Efficient inputs from below-ground of peas	ktonC/yr			2.885	2.06647	2.34524	5.1677	2.09251	0.743015	0.0524192	1.34	4.73082	0.805326	0.70976	0.0139516	0.709977	1.24824	1.51014	3.10638	0.427696	0.0116718	0.00323024	0.0584832	0.101818	0.38813	0.00797411	1.02661	0.0344463	0.0816208	0.0221654	0.156272	0.00370318	0.0855229	0.0489593	0.141059	0.0204513	32.1468
	Efficient inputs from below-ground of other protein crops	ktonC/yr			0.00847514	0.00646545	0.01793	0.00321992	0.00769824	0.00401657	0.00298802	0.000140572	0.00122209	0.00102789	0.00458062	0.00120452	0.0620329	0.0394374	0.115157	0.113253	0.0216233	0.0020686	0.000101466	0.00513858	0.000214286	0.00349637	0.000546074	0.0086995	0.00224049	0.00946422	0.00117442	0.00953075	0.000549545	0	0	0.000128362	0	0.453825
	Efficient inputs from below-ground of sugar beet	ktonC/yr			14.6195	3.93365	2.47022	48.1477	3.48753	4.575	0.0153344	23.1701	35.3633	0.655232	0.0322528	2.26805	0.010736	0.0054906	0.175564	9.39595	2.0337	0.0909334	0	0	0	0	0	0.0113943	0.00193423	0	0.010103	0.0101587	0	0	0	0	0	150.484
	Efficient inputs from below-ground of potatoes	ktonC/yr			0.0502477	0.0365455	0.093509	0.605439	0.0119207	0.113945	0.00473929	0.716245	0.287185	0.00858965	0.0048892	0.0138779	0.0730403	0.00513722	0.00361863	0.0588237	0.0107175	0.000335537	0.000790863	0.00375931	0.00310141	0.00333607	0.00132184	0.00745915	0.00691005	0.000279491	0.0034601	0.00065277	0.000807048	0.0141324	0.0124856	0.0109032	0.0402793	2.20848
	Efficient inputs from below-ground of other roots	ktonC/yr			5.5243e-13	8.2652e-13	5.48056e-13	6.02291e-13	5.95892e-13	4.24561e-13	1.08541e-12	5.60149e-13	3.59183e-13	5.53116e-13	5.19696e-13	6.25755e-13	5.21376e-13	6.6977e-13	4.5062e-13	5.60643e-13	4.86811e-13	2.49103e-13	1.5901e-13	4.43739e-13	5.88084e-13	4.71678e-13	3.94896e-13	3.62882e-13	6.39011e-13	4.01283e-13	2.87776e-13	4.96567e-13	5.11653e-13	2.68996e-12	1.51852e-12	2.11017e-12	1.13335e-11	3.26001e-11
	Efficient inputs from below-ground of green peas	ktonC/yr			0.000316535	3.6589e-05	0.00245798	0.0262106	3.22894e-05	2.89781e-05	8.97917e-05	0.0615154	0.00046538	0.00118551	2.67773e-05	3.09057e-05	0.0833906	0.000991543	0.000273541	0.00123366	0.00155916	0.000634685	4.05186e-06	0.000180768	1.35961e-05	0.000203121	1.29263e-06	0.00147913	0.00106505	0.000783939	0.00480355	6.62837e-05	1.44538e-05	0.00048569	0.0004815	0.000942779	0.000270042	0.191275
	Efficient inputs from below-ground of dry beans	ktonC/yr			0.0188284	0.0011198	0.0425204	0.151207	0.000161547	0.000229877	0.000473954	0.0827286	0.00604352	0.00150318	5.77159e-05	9.72688e-05	0.294499	0.00808622	0.00548036	0.00919332	0.00760275	0.00478207	0	0.000178997	5.95198e-05	0.00093031	0	0.00365075	0.0103566	0.00666525	0.00248331	0.000229944	0.000158976	0.00475859	0.00604381	0.00648706	0.00461816	0.681236
	Efficient inputs from below-ground of green beans	ktonC/yr			0.00737885	0.000296768	0.00936342	0.0738874	0.000168065	0.000172903	0.000567639	0.0808002	0.000148827	0.00601158	0.000290481	0.000457359	0.171433	0.00332179	0.00647112	0.00519872	0.00598053	0.00383402	0.000243433	0.0011318	0.000159501	0.00064382	2.76751e-05	0.0169106	0.0551829	0.0191021	0.0651288	0.00144992	0.000183493	0.00494987	0.00717239	0.00207615	0.00226112	0.552407
	Efficient inputs from below-ground of dry vegetables	ktonC/yr			0.00495587	0.000400443	0.00784238	0.00270325	0	0	1.49173e-05	0.0410312	0.0650686	0.00379207	0.00121171	2.22274e-05	0	0.0418595	0.0102722	0.137747	0.0474373	0	0	2.12636e-05	0.00177332	0.0024726	0.00060304	0.057765	0.000180994	0.00293298	0.00139793	0.000397087	0.000776683	0.000727567	0	0.124462	0.00176755	0.559637
	Efficient inputs from below-ground of dry fruits	ktonC/yr			0.0011574	0.000237989	0	8.74351e-06	0.000837082	0	6.63265e-05	9.02787e-06	0.000970519	0	0.000511848	0.000333018	5.96636e-05	0.0328836	0.00611568	0.00735598	0.00530445	0.000121593	0.0006344	0.000249702	0.0023454	0.297108	0.0031518	0.132777	0.00988128	0.00381764	0.00148016	0.18825	0.0339008	0.0190721	0.00457567	0.0097475	0.00998688	0.77295
	Efficient inputs from below-ground of squash and melons	ktonC/yr			0	0	0	0	0	0	0	0	0	0	0	0	0	0	0	0	0	0	0	0	0	0	0	0	0	0	0	0	0	0	0	0	0	0
	Efficient inputs from below-ground of cabbage	ktonC/yr			0.179854	0.0373028	0.013963	0.0373947	0.0945893	0.0701189	1.4156	2.12667	0.29155	0.0438972	0.0233896	1.8468	9.18872	0.0933584	0.290925	0.120974	0.0322425	0.00887023	0.00849669	0.0900827	0.00751038	0.0478752	0.00169978	0.126137	0.00830035	0.0259161	0.00969499	0.00566131	0.00275208	0.524585	0.648543	0.121683	0.0971032	17.6423
	Efficient inputs from below-ground of leaves vegetables	ktonC/yr			0.175595	0.0160431	0.012204	1.18355	0.0635398	0.0289523	0.24316	2.46469	0.0818185	0.0285837	0.00651384	0.0227157	0.421521	0.0370368	0.264364	0.0977245	0.0544558	0.00256354	0.00620043	0.129534	0.0386386	0.0303891	0.00125569	0.147831	0.0313584	0.0163829	0.00638983	0.00490486	0.00399771	1.19131	1.22548	0.206403	4.66911	12.9142
	Efficient inputs from below-ground of fruits	ktonC/yr			0.0266355	0.0883416	0.0214179	0.1582	0.313529	0.0474243	0.0831318	0.08134	0.0336287	0.00661412	0.0282319	0.0557878	0.125963	0.098618	1.53745	0.506843	0.166774	0.00138595	0.0255442	0.0471277	1.1453	0.531564	0.00245466	2.02044	0.100418	0.0432981	0.0382643	0.397153	0.375079	4.78298	3.90975	1.82432	12.167	30.7921
	Efficient inputs from below-ground of olives	ktonC/yr			0	0	0	0	0	0	0	0	0	0	0	0	0	0	0	0	0	0	0	0	0.00440919	0.00372584	0	0.00226818	0	0	0	0	0	0.0646556	0.105138	0.0568579	0.0226317	0.259687
	Efficient inputs from below-ground of citrus	ktonC/yr			0	0	0	0	0	0	0	0	0	0	0	0	0	0	0	0	0	0	0	0	0	0	0	0	0	0	0	0	0	0	0.00295657	0	0	0.00295657
	Efficient inputs from below-ground of hemp	ktonC/yr			0.00809021	0.00378569	0.000246791	0	0.00172114	3.06203e-05	0	0	0.096546	0.00753832	0.0156475	0.000114268	0.00174805	0.00310187	0.0307863	0.00300774	0.000432735	0.00295573	0	0	0	0.000207231	6.84799e-05	0.0183829	0	0.00215169	0	0.000996188	3.62293e-05	0	0	0.000524599	0	0.19812
	Efficient inputs from below-ground of flax	ktonC/yr			0.0394484	0.365731	0.00669822	0.200711	0.162119	0.535562	5.16077e-05	0.30066	0.00873584	9.91399e-05	0.000321072	0	7.94628e-05	0	0	0.000634213	0	0	0	0	0	0	4.93549e-05	0.000726039	0	0	0	2.38184e-05	0	0	0	0	0	1.62165
	Efficient inputs from below-ground of forage maize	ktonC/yr			0.362784	1.77077	0.399293	7.77951	16.9609	4.22974	11.9014	9.04352	2.84385	4.33205	12.6241	2.05932	37.7545	11.8269	32.8875	5.457	13.2763	0.970785	0.157468	2.71129	0.32406	2.05715	1.84801	7.09951	0.979787	5.9715	1.10781	3.1845	1.63457	0.363331	0.593355	0.117712	0.352735	204.983
	Efficient inputs from below-ground of forage cabbages	ktonC/yr			0.0856276	0.0671012	0.0529974	0.232746	0.185398	0.0591282	0.116677	0.131114	0.190133	0.0910367	0.290952	0.0645141	0.274606	0.1388	0.29893	0.334963	0.278072	0.0509991	0.0139786	0.0280725	0.0653221	0.0617076	0.0677326	0.171832	0.0427892	0.0500036	0.0205618	0.0840699	0.0993555	0.0891458	0.10049	0.22389	0.17384	4.23659
	Efficient inputs from below-ground of alfalfa and clover	ktonC/yr			1.89148	3.60165	0.475843	5.44398	1.84113	0.439684	1.51357	1.51441	69.2359	8.79054	6.94653	1.25461	3.5108	10.3313	13.0946	12.1028	16.901	1.10921	0.410039	2.26445	16.8947	13.2899	8.99535	30.3497	1.01305	1.97427	0.128412	10.3765	1.23051	9.91643	12.2166	6.82973	4.40952	280.298
	Efficient inputs from below-ground of non-legume temporary meadow	ktonC/yr			1.43669	3.27701	1.28039	5.62864	26.6343	10.4941	48.9589	7.11824	5.65199	9.58736	22.0305	3.74395	256.838	83.0355	218.52	79.4014	184.246	16.0006	2.23672	15.704	8.46443	10.6636	69.6036	66.3034	3.26247	53.7545	5.94061	35.3362	54.7936	2.94117	1.81731	2.3137	1.22214	1318.24
	Efficient inputs from below-ground of natural meadow	ktonC/yr			0	2.26189e-09	0	0	60.6526	27.468	50.9444	0	0	0	121.522	0	45.9193	51.5649	113.544	0	375.038	75.7233	42.8326	50.5606	26.146	49.5242	74.6702	74.5911	0	58.456	0	48.027	106.556	0	0	0	0	1453.74
	Efficient inputs from below-ground of weed	ktonC/yr			0	0	0	0	0	0	0	0	0	0	0	0	0	0	0	0	0	0	0	0	0	0	0	0	0	0	0	0	0	0	0	0	0	0
	Total efficient inputs from below-ground residue to arable land	ktonC/yr			85.3192	58.8854	64.0375	193.175	98.9865	48.2833	74.5235	118.189	242.245	89.5538	120.347	43.3458	374.735	173.253	367.338	326.805	285.67	25.3865	3.73991	36.1875	31.3128	47.1992	87.3725	215.302	17.0574	88.336	30.0097	62.6967	60.6584	31.0427	25.3136	24.3698	24.5597	3575.24
	Total efficient inputs from below-ground residue to permanent grassland	ktonC/yr			0	2.26189e-09	0	0	60.6526	27.468	50.9444	0	0	0	121.522	0	45.9193	51.5649	113.544	0	375.038	75.7233	42.8326	50.5606	26.146	49.5242	74.6702	74.5911	0	58.456	0	48.027	106.556	0	0	0	0	1453.74
	Total efficient inputs
	Total efficient inputs to arable land	ktonC/yr			688.626	437.455	417.512	1362.41	462.181	212.637	195.286	715.019	1248.33	581.549	649.312	363.542	943.135	759.529	1372.22	1958.79	991.946	95.6347	18.4719	168.318	83.392	205.32	169.363	1580.7	89.7027	417.868	169.135	202.199	98.1691	79.1899	158.647	76.0095	34.6232	17006.2
	Total efficient inputs to permanent grassland	ktonC/yr			0	2.54507e-09	0	0	94.6726	44.3551	74.0856	0	0	0	194.063	0	62.2157	79.5505	158.05	0	569.92	110.359	60.6493	73.6628	43.9187	71.5223	105.997	117.191	0	82.968	0	71.5084	151.666	0	0	0	0	2166.36
	Feed importation from other regions or country
	N in imported feed	ktN/yr			0	0	0	0	0	0	0	0	0	0	0	0	0	0	0	0	0	0	0	0	0	0	0	0	0	0	0	0	0	0	0	0	0	0
	C/N imported feed	gC/gN	Taken as soja C/N		6.66667	6.66667	6.66667	6.66667	6.66667	6.66667	6.66667	6.66667	6.66667	6.66667	6.66667	6.66667	6.66667	6.66667	6.66667	6.66667	6.66667	6.66667	6.66667	6.66667	6.66667	6.66667	6.66667	6.66667	6.66667	6.66667	6.66667	6.66667	6.66667	6.66667	6.66667	6.66667	6.66667	6.66667
	Animal production and excretion
	Animal production
	bovines	kton carcass/yr	Agreste (data for 2014)		0	0	0	0	183.969	96.0888	97.7489	0	0	0	312.38	0	244.943	266.046	444.578	0	403.415	59.6	28.9397	59.4477	15.1282	74.817	88.0444	241.83	0	72.2735	0	104.037	58.523	0	0	0	0	2851.81
	ovines	kton carcass/yr	Agreste (data for 2014)		0	0	0	0	0.210388	0.0838258	0.0753453	0	0	0	0.340259	0	0.889624	11.1743	11.933	0	3.84778	0.178363	0.73376	1.4909	1.26774	4.79746	2.45749	5.05398	0	0.298577	0	2.52758	0.242712	0	0	0	0	47.603
	caprines	kton carcass/yr	Agreste (data for 2014)		0	0	0	0	3.63846	1.32703	1.22166	0	0	0	8.86414	0	0.771187	4.08335	6.35507	0	20.878	0.352388	1.45325	1.32341	27.8785	8.27452	15.5608	42.1426	0	18.9583	0	6.67352	1.1076	0	0	0	0	170.864
	porcines	kton carcass/yr	Agreste (data for 2014)		0	0	0	0	7.79368	4.00605	10.6402	0	0	0	6.36817	0	198.161	19.9312	52.3946	0	17.7634	3.9539	1.33974	8.59416	2.31187	8.43953	7.81756	17.9517	0	13.3371	0	7.717	3.27034	0	0	0	0	391.792
	poultry	kton carcass/yr	Agreste (data for 2014)		0	0	0	0	81.6096	44.2593	27.6481	0	0	0	87.4736	0	588.763	355.101	585.642	0	259.043	19.8171	38.8256	48.0508	65.8348	109.907	69.4588	375.263	0	69.1452	0	126.044	19.1592	0	0	0	0	2971.04
	equine	kton carcass/yr	Estimated from the number of horses heads		0	0	0	0	0.0340191	0.00823164	0.00289385	0	0	0	0.029539	0	0.0172081	0.0183985	0.0281915	0	0.0457869	0.0100977	0.00176797	0.0192561	0.00484461	0.0583237	0.01152	0.102018	0	0.00512523	0	0.0136737	0.00483773	0	0	0	0	0.415733
	eggs	kton/yr	Agreste (data for 2014)		0	0	0	0	44.2163	19.2261	14.9798	0	0	0	81.0172	0	215.774	90.2073	117.789	0	149.142	24.3546	26.9559	33.3607	72.5315	76.3063	37.4199	192.742	0	34.9179	0	33.196	19.7653	0	0	0	0	1283.9
	cow milk	kton/yr	Agreste (data for 2014)		0	0	0	0	2826.14	1338.97	1967.62	0	0	0	4564.99	0	6550.79	2420.25	6154.52	0	3119.53	2232.5	1049.13	1245.05	204.579	1102.88	913.392	2679.41	0	839.777	0	786.645	786.315	0	0	0	0	40782.5
	sheep and goat milk	kton/yr	Agreste (data for 2014)		0	0	0	0	0.0361987	0.00821734	0.00943797	0	0	0	0.0715807	0	0.168564	1.39108	2.3989	0	1.1187	0.0227614	0.145798	0.184625	0.329278	1.07639	8.1081	3.57768	0	2.18931	0	0.755068	0.0672466	0	0	0	0	21.6589
	%N in each organ
edible fraction	%N in boneless bovine meat	%	from USDA		3.13	3.13	3.13	3.13	3.13	3.13	3.13	3.13	3.13	3.13	3.13	3.13	3.13	3.13	3.13	3.13	3.13	3.13	3.13	3.13	3.13	3.13	3.13	3.13	3.13	3.13	3.13	3.13	3.13	3.13	3.13	3.13	3.13	3.13
	% N in bovine bones	%	Mello et al. 1978		5.5	5.5	5.5	5.5	5.5	5.5	5.5	5.5	5.5	5.5	5.5	5.5	5.5	5.5	5.5	5.5	5.5	5.5	5.5	5.5	5.5	5.5	5.5	5.5	5.5	5.5	5.5	5.5	5.5	5.5	5.5	5.5	5.5	5.5
	%N in edible bovine grease	%	from USDA		0.3	0.3	0.3	0.3	0.3	0.3	0.3	0.3	0.3	0.3	0.3	0.3	0.3	0.3	0.3	0.3	0.3	0.3	0.3	0.3	0.3	0.3	0.3	0.3	0.3	0.3	0.3	0.3	0.3	0.3	0.3	0.3	0.3	0.3
non edible fraction	%N in bovine skin	%	from USDA		5.28	5.28	5.28	5.28	5.28	5.28	5.28	5.28	5.28	5.28	5.28	5.28	5.28	5.28	5.28	5.28	5.28	5.28	5.28	5.28	5.28	5.28	5.28	5.28	5.28	5.28	5.28	5.28	5.28	5.28	5.28	5.28	5.28	5.28
	%N bovine blood	%	from USDA		2.446	2.446	2.446	2.446	2.446	2.446	2.446	2.446	2.446	2.446	2.446	2.446	2.446	2.446	2.446	2.446	2.446	2.446	2.446	2.446	2.446	2.446	2.446	2.446	2.446	2.446	2.446	2.446	2.446	2.446	2.446	2.446	2.446	2.446
	%N bovine casing	%	from USDA		0.5	0.5	0.5	0.5	0.5	0.5	0.5	0.5	0.5	0.5	0.5	0.5	0.5	0.5	0.5	0.5	0.5	0.5	0.5	0.5	0.5	0.5	0.5	0.5	0.5	0.5	0.5	0.5	0.5	0.5	0.5	0.5	0.5	0.5
	%N bovine head and feet	%	from USDA		6	6	6	6	6	6	6	6	6	6	6	6	6	6	6	6	6	6	6	6	6	6	6	6	6	6	6	6	6	6	6	6	6	6
	%N bovine offals	%	from USDA		2.9	2.9	2.9	2.9	2.9	2.9	2.9	2.9	2.9	2.9	2.9	2.9	2.9	2.9	2.9	2.9	2.9	2.9	2.9	2.9	2.9	2.9	2.9	2.9	2.9	2.9	2.9	2.9	2.9	2.9	2.9	2.9	2.9	2.9
	%N bovine unedible grease	%	from USDA		0.3	0.3	0.3	0.3	0.3	0.3	0.3	0.3	0.3	0.3	0.3	0.3	0.3	0.3	0.3	0.3	0.3	0.3	0.3	0.3	0.3	0.3	0.3	0.3	0.3	0.3	0.3	0.3	0.3	0.3	0.3	0.3	0.3	0.3
edible fraction	%N in boneless ovine meat	%	from USDA		2.7	2.7	2.7	2.7	2.7	2.7	2.7	2.7	2.7	2.7	2.7	2.7	2.7	2.7	2.7	2.7	2.7	2.7	2.7	2.7	2.7	2.7	2.7	2.7	2.7	2.7	2.7	2.7	2.7	2.7	2.7	2.7	2.7	2.7
	% N in ovine bones	%	Mello et al. 1978		5.5	5.5	5.5	5.5	5.5	5.5	5.5	5.5	5.5	5.5	5.5	5.5	5.5	5.5	5.5	5.5	5.5	5.5	5.5	5.5	5.5	5.5	5.5	5.5	5.5	5.5	5.5	5.5	5.5	5.5	5.5	5.5	5.5	5.5
	%N in edible ovine grease	%	from USDA		0.3	0.3	0.3	0.3	0.3	0.3	0.3	0.3	0.3	0.3	0.3	0.3	0.3	0.3	0.3	0.3	0.3	0.3	0.3	0.3	0.3	0.3	0.3	0.3	0.3	0.3	0.3	0.3	0.3	0.3	0.3	0.3	0.3	0.3
non edible fraction	%N in ovine skin	%	from USDA		5.28	5.28	5.28	5.28	5.28	5.28	5.28	5.28	5.28	5.28	5.28	5.28	5.28	5.28	5.28	5.28	5.28	5.28	5.28	5.28	5.28	5.28	5.28	5.28	5.28	5.28	5.28	5.28	5.28	5.28	5.28	5.28	5.28	5.28
	%N ovine blood	%	from USDA		2.446	2.446	2.446	2.446	2.446	2.446	2.446	2.446	2.446	2.446	2.446	2.446	2.446	2.446	2.446	2.446	2.446	2.446	2.446	2.446	2.446	2.446	2.446	2.446	2.446	2.446	2.446	2.446	2.446	2.446	2.446	2.446	2.446	2.446
	%N ovine casing	%	from USDA		0.5	0.5	0.5	0.5	0.5	0.5	0.5	0.5	0.5	0.5	0.5	0.5	0.5	0.5	0.5	0.5	0.5	0.5	0.5	0.5	0.5	0.5	0.5	0.5	0.5	0.5	0.5	0.5	0.5	0.5	0.5	0.5	0.5	0.5
	%N ovine head and feet	%	from USDA		6	6	6	6	6	6	6	6	6	6	6	6	6	6	6	6	6	6	6	6	6	6	6	6	6	6	6	6	6	6	6	6	6	6
	%N ovine offals	%	from USDA		2.9	2.9	2.9	2.9	2.9	2.9	2.9	2.9	2.9	2.9	2.9	2.9	2.9	2.9	2.9	2.9	2.9	2.9	2.9	2.9	2.9	2.9	2.9	2.9	2.9	2.9	2.9	2.9	2.9	2.9	2.9	2.9	2.9	2.9
	%N ovine unedible grease	%	from USDA		0.3	0.3	0.3	0.3	0.3	0.3	0.3	0.3	0.3	0.3	0.3	0.3	0.3	0.3	0.3	0.3	0.3	0.3	0.3	0.3	0.3	0.3	0.3	0.3	0.3	0.3	0.3	0.3	0.3	0.3	0.3	0.3	0.3	0.3
edible fraction	%N in boneless porcine meat	%	from USDA		3.5	3.5	3.5	3.5	3.5	3.5	3.5	3.5	3.5	3.5	3.5	3.5	3.5	3.5	3.5	3.5	3.5	3.5	3.5	3.5	3.5	3.5	3.5	3.5	3.5	3.5	3.5	3.5	3.5	3.5	3.5	3.5	3.5	3.5
	% N in porcine bones	%	Mello et al. 1978		5.5	5.5	5.5	5.5	5.5	5.5	5.5	5.5	5.5	5.5	5.5	5.5	5.5	5.5	5.5	5.5	5.5	5.5	5.5	5.5	5.5	5.5	5.5	5.5	5.5	5.5	5.5	5.5	5.5	5.5	5.5	5.5	5.5	5.5
	%N in edible porcine grease	%	from USDA		0.75	0.75	0.75	0.75	0.75	0.75	0.75	0.75	0.75	0.75	0.75	0.75	0.75	0.75	0.75	0.75	0.75	0.75	0.75	0.75	0.75	0.75	0.75	0.75	0.75	0.75	0.75	0.75	0.75	0.75	0.75	0.75	0.75	0.75
non edible fraction	%N in porcine skin	%	from USDA		5.28	5.28	5.28	5.28	5.28	5.28	5.28	5.28	5.28	5.28	5.28	5.28	5.28	5.28	5.28	5.28	5.28	5.28	5.28	5.28	5.28	5.28	5.28	5.28	5.28	5.28	5.28	5.28	5.28	5.28	5.28	5.28	5.28	5.28
	%N porcine blood	%	from USDA		2.446	2.446	2.446	2.446	2.446	2.446	2.446	2.446	2.446	2.446	2.446	2.446	2.446	2.446	2.446	2.446	2.446	2.446	2.446	2.446	2.446	2.446	2.446	2.446	2.446	2.446	2.446	2.446	2.446	2.446	2.446	2.446	2.446	2.446
	%N porcine casing	%	from USDA		0.5	0.5	0.5	0.5	0.5	0.5	0.5	0.5	0.5	0.5	0.5	0.5	0.5	0.5	0.5	0.5	0.5	0.5	0.5	0.5	0.5	0.5	0.5	0.5	0.5	0.5	0.5	0.5	0.5	0.5	0.5	0.5	0.5	0.5
	%N porcine head and feet	%	from USDA		6	6	6	6	6	6	6	6	6	6	6	6	6	6	6	6	6	6	6	6	6	6	6	6	6	6	6	6	6	6	6	6	6	6
	%N porcine offals	%	from USDA		2.9	2.9	2.9	2.9	2.9	2.9	2.9	2.9	2.9	2.9	2.9	2.9	2.9	2.9	2.9	2.9	2.9	2.9	2.9	2.9	2.9	2.9	2.9	2.9	2.9	2.9	2.9	2.9	2.9	2.9	2.9	2.9	2.9	2.9
	%N porcine unedible grease	%	from USDA		0.75	0.75	0.75	0.75	0.75	0.75	0.75	0.75	0.75	0.75	0.75	0.75	0.75	0.75	0.75	0.75	0.75	0.75	0.75	0.75	0.75	0.75	0.75	0.75	0.75	0.75	0.75	0.75	0.75	0.75	0.75	0.75	0.75	0.75
edible fraction	%N in boneless poultry meat	%	from USDA		3	3	3	3	3	3	3	3	3	3	3	3	3	3	3	3	3	3	3	3	3	3	3	3	3	3	3	3	3	3	3	3	3	3
	% N in poultry bones	%	Mello et al. 1978		5.5	5.5	5.5	5.5	5.5	5.5	5.5	5.5	5.5	5.5	5.5	5.5	5.5	5.5	5.5	5.5	5.5	5.5	5.5	5.5	5.5	5.5	5.5	5.5	5.5	5.5	5.5	5.5	5.5	5.5	5.5	5.5	5.5	5.5
	%N in edible poultry grease	%	from USDA		0.32	0.32	0.32	0.32	0.32	0.32	0.32	0.32	0.32	0.32	0.32	0.32	0.32	0.32	0.32	0.32	0.32	0.32	0.32	0.32	0.32	0.32	0.32	0.32	0.32	0.32	0.32	0.32	0.32	0.32	0.32	0.32	0.32	0.32
non edible fraction	%N in poultry feathers	%	from USDA		5.28	5.28	5.28	5.28	5.28	5.28	5.28	5.28	5.28	5.28	5.28	5.28	5.28	5.28	5.28	5.28	5.28	5.28	5.28	5.28	5.28	5.28	5.28	5.28	5.28	5.28	5.28	5.28	5.28	5.28	5.28	5.28	5.28	5.28
	%N poultry blood	%	from USDA		2.446	2.446	2.446	2.446	2.446	2.446	2.446	2.446	2.446	2.446	2.446	2.446	2.446	2.446	2.446	2.446	2.446	2.446	2.446	2.446	2.446	2.446	2.446	2.446	2.446	2.446	2.446	2.446	2.446	2.446	2.446	2.446	2.446	2.446
	%N poultry casing	%	from USDA		0.5	0.5	0.5	0.5	0.5	0.5	0.5	0.5	0.5	0.5	0.5	0.5	0.5	0.5	0.5	0.5	0.5	0.5	0.5	0.5	0.5	0.5	0.5	0.5	0.5	0.5	0.5	0.5	0.5	0.5	0.5	0.5	0.5	0.5
	%N poultry head and feet	%	from USDA		6	6	6	6	6	6	6	6	6	6	6	6	6	6	6	6	6	6	6	6	6	6	6	6	6	6	6	6	6	6	6	6	6	6
	%N poultry offals	%	from USDA		2.9	2.9	2.9	2.9	2.9	2.9	2.9	2.9	2.9	2.9	2.9	2.9	2.9	2.9	2.9	2.9	2.9	2.9	2.9	2.9	2.9	2.9	2.9	2.9	2.9	2.9	2.9	2.9	2.9	2.9	2.9	2.9	2.9	2.9
	%N poultry unedible grease	%	from USDA		0.32	0.32	0.32	0.32	0.32	0.32	0.32	0.32	0.32	0.32	0.32	0.32	0.32	0.32	0.32	0.32	0.32	0.32	0.32	0.32	0.32	0.32	0.32	0.32	0.32	0.32	0.32	0.32	0.32	0.32	0.32	0.32	0.32	0.32
	%N eggs	%	from USDA		1.79	1.79	1.79	1.79	1.79	1.79	1.79	1.79	1.79	1.79	1.79	1.79	1.79	1.79	1.79	1.79	1.79	1.79	1.79	1.79	1.79	1.79	1.79	1.79	1.79	1.79	1.79	1.79	1.79	1.79	1.79	1.79	1.79	1.79
	%N cow milk	%	from USDA		0.53	0.53	0.53	0.53	0.53	0.53	0.53	0.53	0.53	0.53	0.53	0.53	0.53	0.53	0.53	0.53	0.53	0.53	0.53	0.53	0.53	0.53	0.53	0.53	0.53	0.53	0.53	0.53	0.53	0.53	0.53	0.53	0.53	0.53
	%N sheep and goat milk	%	from USDA		0.94	0.94	0.94	0.94	0.94	0.94	0.94	0.94	0.94	0.94	0.94	0.94	0.94	0.94	0.94	0.94	0.94	0.94	0.94	0.94	0.94	0.94	0.94	0.94	0.94	0.94	0.94	0.94	0.94	0.94	0.94	0.94	0.94	0.94
edible fraction	%N in boneless equine meat	%	taken as bovine		3.13	3.13	3.13	3.13	3.13	3.13	3.13	3.13	3.13	3.13	3.13	3.13	3.13	3.13	3.13	3.13	3.13	3.13	3.13	3.13	3.13	3.13	3.13	3.13	3.13	3.13	3.13	3.13	3.13	3.13	3.13	3.13	3.13	3.13
	% N in equine bones	%	taken as bovine		5.5	5.5	5.5	5.5	5.5	5.5	5.5	5.5	5.5	5.5	5.5	5.5	5.5	5.5	5.5	5.5	5.5	5.5	5.5	5.5	5.5	5.5	5.5	5.5	5.5	5.5	5.5	5.5	5.5	5.5	5.5	5.5	5.5	5.5
	%N in edible equine grease	%	taken as bovine		0.3	0.3	0.3	0.3	0.3	0.3	0.3	0.3	0.3	0.3	0.3	0.3	0.3	0.3	0.3	0.3	0.3	0.3	0.3	0.3	0.3	0.3	0.3	0.3	0.3	0.3	0.3	0.3	0.3	0.3	0.3	0.3	0.3	0.3
non edible fraction	%N in equine feathers	%	taken as bovine		5.28	5.28	5.28	5.28	5.28	5.28	5.28	5.28	5.28	5.28	5.28	5.28	5.28	5.28	5.28	5.28	5.28	5.28	5.28	5.28	5.28	5.28	5.28	5.28	5.28	5.28	5.28	5.28	5.28	5.28	5.28	5.28	5.28	5.28
	%N equine* blood	%	taken as bovine		2.446	2.446	2.446	2.446	2.446	2.446	2.446	2.446	2.446	2.446	2.446	2.446	2.446	2.446	2.446	2.446	2.446	2.446	2.446	2.446	2.446	2.446	2.446	2.446	2.446	2.446	2.446	2.446	2.446	2.446	2.446	2.446	2.446	2.446
	%N equinecasing	%	taken as bovine		0.5	0.5	0.5	0.5	0.5	0.5	0.5	0.5	0.5	0.5	0.5	0.5	0.5	0.5	0.5	0.5	0.5	0.5	0.5	0.5	0.5	0.5	0.5	0.5	0.5	0.5	0.5	0.5	0.5	0.5	0.5	0.5	0.5	0.5
	%N equine head and feet	%	taken as bovine		6	6	6	6	6	6	6	6	6	6	6	6	6	6	6	6	6	6	6	6	6	6	6	6	6	6	6	6	6	6	6	6	6	6
	%N equine offals	%	taken as bovine		2.9	2.9	2.9	2.9	2.9	2.9	2.9	2.9	2.9	2.9	2.9	2.9	2.9	2.9	2.9	2.9	2.9	2.9	2.9	2.9	2.9	2.9	2.9	2.9	2.9	2.9	2.9	2.9	2.9	2.9	2.9	2.9	2.9	2.9
	%N equine unedible grease	%	taken as bovine		0.3	0.3	0.3	0.3	0.3	0.3	0.3	0.3	0.3	0.3	0.3	0.3	0.3	0.3	0.3	0.3	0.3	0.3	0.3	0.3	0.3	0.3	0.3	0.3	0.3	0.3	0.3	0.3	0.3	0.3	0.3	0.3	0.3	0.3
	% carcass weight
edible fraction	% boneless meat in bovine carcass weight	%	Benhalima et al. 2015; CIQUAL		69.2308	69.2308	69.2308	69.2308	69.2308	69.2308	69.2308	69.2308	69.2308	69.2308	69.2308	69.2308	69.2308	69.2308	69.2308	69.2308	69.2308	69.2308	69.2308	69.2308	69.2308	69.2308	69.2308	69.2308	69.2308	69.2308	69.2308	69.2308	69.2308	69.2308	69.2308	69.2308	69.2308	69.2308
	% bones in bovine carcass weight	%	Benhalima et al. 2015; CIQUAL		19.2308	19.2308	19.2308	19.2308	19.2308	19.2308	19.2308	19.2308	19.2308	19.2308	19.2308	19.2308	19.2308	19.2308	19.2308	19.2308	19.2308	19.2308	19.2308	19.2308	19.2308	19.2308	19.2308	19.2308	19.2308	19.2308	19.2308	19.2308	19.2308	19.2308	19.2308	19.2308	19.2308	19.2308
	% edible grease in bovine carcass weight	%	Benhalima et al. 2015; CIQUAL		11.5385	11.5385	11.5385	11.5385	11.5385	11.5385	11.5385	11.5385	11.5385	11.5385	11.5385	11.5385	11.5385	11.5385	11.5385	11.5385	11.5385	11.5385	11.5385	11.5385	11.5385	11.5385	11.5385	11.5385	11.5385	11.5385	11.5385	11.5385	11.5385	11.5385	11.5385	11.5385	11.5385	11.5385
non edible fraction	% skin in bovine carcass weight	%	Benhalima et al. 2015; CIQUAL		15.3846	15.3846	15.3846	15.3846	15.3846	15.3846	15.3846	15.3846	15.3846	15.3846	15.3846	15.3846	15.3846	15.3846	15.3846	15.3846	15.3846	15.3846	15.3846	15.3846	15.3846	15.3846	15.3846	15.3846	15.3846	15.3846	15.3846	15.3846	15.3846	15.3846	15.3846	15.3846	15.3846	15.3846
	% blood in bovine carcass weight	%	Benhalima et al. 2015; CIQUAL		7.69231	7.69231	7.69231	7.69231	7.69231	7.69231	7.69231	7.69231	7.69231	7.69231	7.69231	7.69231	7.69231	7.69231	7.69231	7.69231	7.69231	7.69231	7.69231	7.69231	7.69231	7.69231	7.69231	7.69231	7.69231	7.69231	7.69231	7.69231	7.69231	7.69231	7.69231	7.69231	7.69231	7.69231
	% casing in bovine carcass weight	%	Benhalima et al. 2015; CIQUAL		48.0769	48.0769	48.0769	48.0769	48.0769	48.0769	48.0769	48.0769	48.0769	48.0769	48.0769	48.0769	48.0769	48.0769	48.0769	48.0769	48.0769	48.0769	48.0769	48.0769	48.0769	48.0769	48.0769	48.0769	48.0769	48.0769	48.0769	48.0769	48.0769	48.0769	48.0769	48.0769	48.0769	48.0769
	% head and feet in bovine carcass weight	%	Benhalima et al. 2015; CIQUAL		5.76923	5.76923	5.76923	5.76923	5.76923	5.76923	5.76923	5.76923	5.76923	5.76923	5.76923	5.76923	5.76923	5.76923	5.76923	5.76923	5.76923	5.76923	5.76923	5.76923	5.76923	5.76923	5.76923	5.76923	5.76923	5.76923	5.76923	5.76923	5.76923	5.76923	5.76923	5.76923	5.76923	5.76923
	% offals in bovine carcass weight	%	Benhalima et al. 2015; CIQUAL		5.76923	5.76923	5.76923	5.76923	5.76923	5.76923	5.76923	5.76923	5.76923	5.76923	5.76923	5.76923	5.76923	5.76923	5.76923	5.76923	5.76923	5.76923	5.76923	5.76923	5.76923	5.76923	5.76923	5.76923	5.76923	5.76923	5.76923	5.76923	5.76923	5.76923	5.76923	5.76923	5.76923	5.76923
	% unedible grease in bovine carcass weight	%	Benhalima et al. 2015; CIQUAL		9.61538	9.61538	9.61538	9.61538	9.61538	9.61538	9.61538	9.61538	9.61538	9.61538	9.61538	9.61538	9.61538	9.61538	9.61538	9.61538	9.61538	9.61538	9.61538	9.61538	9.61538	9.61538	9.61538	9.61538	9.61538	9.61538	9.61538	9.61538	9.61538	9.61538	9.61538	9.61538	9.61538	9.61538
	%N edible in bovine carcass weight	%			2.26788	2.26788	2.26788	2.26788	2.26788	2.26788	2.26788	2.26788	2.26788	2.26788	2.26788	2.26788	2.26788	2.26788	2.26788	2.26788	2.26788	2.26788	2.26788	2.26788	2.26788	2.26788	2.26788	2.26788	2.26788	2.26788	2.26788	2.26788	2.26788	2.26788	2.26788	2.26788	2.26788	2.26788
	%N non edible in bovine carcass weight	%			2.7745	2.7745	2.7745	2.7745	2.7745	2.7745	2.7745	2.7745	2.7745	2.7745	2.7745	2.7745	2.7745	2.7745	2.7745	2.7745	2.7745	2.7745	2.7745	2.7745	2.7745	2.7745	2.7745	2.7745	2.7745	2.7745	2.7745	2.7745	2.7745	2.7745	2.7745	2.7745	2.7745	2.7745
edible fraction	% boneless meat in ovine carcass weight	%	Benhalima et al. 2015; CIQUAL		75	75	75	75	75	75	75	75	75	75	75	75	75	75	75	75	75	75	75	75	75	75	75	75	75	75	75	75	75	75	75	75	75	75
	% bones in ovine carcass weight	%	Benhalima et al. 2015; CIQUAL		15.3846	15.3846	15.3846	15.3846	15.3846	15.3846	15.3846	15.3846	15.3846	15.3846	15.3846	15.3846	15.3846	15.3846	15.3846	15.3846	15.3846	15.3846	15.3846	15.3846	15.3846	15.3846	15.3846	15.3846	15.3846	15.3846	15.3846	15.3846	15.3846	15.3846	15.3846	15.3846	15.3846	15.3846
	% edible grease in ovine carcass weight	%	Benhalima et al. 2015; CIQUAL		9.61538	9.61538	9.61538	9.61538	9.61538	9.61538	9.61538	9.61538	9.61538	9.61538	9.61538	9.61538	9.61538	9.61538	9.61538	9.61538	9.61538	9.61538	9.61538	9.61538	9.61538	9.61538	9.61538	9.61538	9.61538	9.61538	9.61538	9.61538	9.61538	9.61538	9.61538	9.61538	9.61538	9.61538
non edible fraction	% skin in ovine carcass weight	%	Benhalima et al. 2015; CIQUAL		15.3846	15.3846	15.3846	15.3846	15.3846	15.3846	15.3846	15.3846	15.3846	15.3846	15.3846	15.3846	15.3846	15.3846	15.3846	15.3846	15.3846	15.3846	15.3846	15.3846	15.3846	15.3846	15.3846	15.3846	15.3846	15.3846	15.3846	15.3846	15.3846	15.3846	15.3846	15.3846	15.3846	15.3846
	% blood in ovine carcass weight	%	Benhalima et al. 2015; CIQUAL		7.69231	7.69231	7.69231	7.69231	7.69231	7.69231	7.69231	7.69231	7.69231	7.69231	7.69231	7.69231	7.69231	7.69231	7.69231	7.69231	7.69231	7.69231	7.69231	7.69231	7.69231	7.69231	7.69231	7.69231	7.69231	7.69231	7.69231	7.69231	7.69231	7.69231	7.69231	7.69231	7.69231	7.69231
	% casing in ovine carcass weight	%	Benhalima et al. 2015; CIQUAL		48.0769	48.0769	48.0769	48.0769	48.0769	48.0769	48.0769	48.0769	48.0769	48.0769	48.0769	48.0769	48.0769	48.0769	48.0769	48.0769	48.0769	48.0769	48.0769	48.0769	48.0769	48.0769	48.0769	48.0769	48.0769	48.0769	48.0769	48.0769	48.0769	48.0769	48.0769	48.0769	48.0769	48.0769
	% head and feet in ovine carcass weight	%	Benhalima et al. 2015; CIQUAL		5.76923	5.76923	5.76923	5.76923	5.76923	5.76923	5.76923	5.76923	5.76923	5.76923	5.76923	5.76923	5.76923	5.76923	5.76923	5.76923	5.76923	5.76923	5.76923	5.76923	5.76923	5.76923	5.76923	5.76923	5.76923	5.76923	5.76923	5.76923	5.76923	5.76923	5.76923	5.76923	5.76923	5.76923
	% offals in ovine carcass weight	%	Benhalima et al. 2015; CIQUAL		5.76923	5.76923	5.76923	5.76923	5.76923	5.76923	5.76923	5.76923	5.76923	5.76923	5.76923	5.76923	5.76923	5.76923	5.76923	5.76923	5.76923	5.76923	5.76923	5.76923	5.76923	5.76923	5.76923	5.76923	5.76923	5.76923	5.76923	5.76923	5.76923	5.76923	5.76923	5.76923	5.76923	5.76923
	% unedible grease in ovine carcass weight	%	Benhalima et al. 2015; CIQUAL		9.61538	9.61538	9.61538	9.61538	9.61538	9.61538	9.61538	9.61538	9.61538	9.61538	9.61538	9.61538	9.61538	9.61538	9.61538	9.61538	9.61538	9.61538	9.61538	9.61538	9.61538	9.61538	9.61538	9.61538	9.61538	9.61538	9.61538	9.61538	9.61538	9.61538	9.61538	9.61538	9.61538	9.61538
	%N edible in ovine carcass weight	%			2.12308	2.12308	2.12308	2.12308	2.12308	2.12308	2.12308	2.12308	2.12308	2.12308	2.12308	2.12308	2.12308	2.12308	2.12308	2.12308	2.12308	2.12308	2.12308	2.12308	2.12308	2.12308	2.12308	2.12308	2.12308	2.12308	2.12308	2.12308	2.12308	2.12308	2.12308	2.12308	2.12308	0.342596
	%N non edible in ovine carcass weight	%			2.56008	2.56008	2.56008	2.56008	2.56008	2.56008	2.56008	2.56008	2.56008	2.56008	2.56008	2.56008	2.56008	2.56008	2.56008	2.56008	2.56008	2.56008	2.56008	2.56008	2.56008	2.56008	2.56008	2.56008	2.56008	2.56008	2.56008	2.56008	2.56008	2.56008	2.56008	2.56008	2.56008	3.21644
edible fraction	% boneless meat in porcine carcass weight	%	Benhalima et al. 2015; CIQUAL		78.5714	78.5714	78.5714	78.5714	78.5714	78.5714	78.5714	78.5714	78.5714	78.5714	78.5714	78.5714	78.5714	78.5714	78.5714	78.5714	78.5714	78.5714	78.5714	78.5714	78.5714	78.5714	78.5714	78.5714	78.5714	78.5714	78.5714	78.5714	78.5714	78.5714	78.5714	78.5714	78.5714	78.5714
	% bones in porcine carcass weight	%	Benhalima et al. 2015; CIQUAL		14.2857	14.2857	14.2857	14.2857	14.2857	14.2857	14.2857	14.2857	14.2857	14.2857	14.2857	14.2857	14.2857	14.2857	14.2857	14.2857	14.2857	14.2857	14.2857	14.2857	14.2857	14.2857	14.2857	14.2857	14.2857	14.2857	14.2857	14.2857	14.2857	14.2857	14.2857	14.2857	14.2857	14.2857
	% edible grease in porcine carcass weight	%	Benhalima et al. 2015; CIQUAL		7.14286	7.14286	7.14286	7.14286	7.14286	7.14286	7.14286	7.14286	7.14286	7.14286	7.14286	7.14286	7.14286	7.14286	7.14286	7.14286	7.14286	7.14286	7.14286	7.14286	7.14286	7.14286	7.14286	7.14286	7.14286	7.14286	7.14286	7.14286	7.14286	7.14286	7.14286	7.14286	7.14286	7.14286
non edible fraction	% skin in porcine carcass weight	%	Benhalima et al. 2015; CIQUAL		11.4286	11.4286	11.4286	11.4286	11.4286	11.4286	11.4286	11.4286	11.4286	11.4286	11.4286	11.4286	11.4286	11.4286	11.4286	11.4286	11.4286	11.4286	11.4286	11.4286	11.4286	11.4286	11.4286	11.4286	11.4286	11.4286	11.4286	11.4286	11.4286	11.4286	11.4286	11.4286	11.4286	11.4286
	% blood in porcine carcass weight	%	Benhalima et al. 2015; CIQUAL		4.85714	4.85714	4.85714	4.85714	4.85714	4.85714	4.85714	4.85714	4.85714	4.85714	4.85714	4.85714	4.85714	4.85714	4.85714	4.85714	4.85714	4.85714	4.85714	4.85714	4.85714	4.85714	4.85714	4.85714	4.85714	4.85714	4.85714	4.85714	4.85714	4.85714	4.85714	4.85714	4.85714	4.85714
	% casing in porcine carcass weight	%	Benhalima et al. 2015; CIQUAL		14.2857	14.2857	14.2857	14.2857	14.2857	14.2857	14.2857	14.2857	14.2857	14.2857	14.2857	14.2857	14.2857	14.2857	14.2857	14.2857	14.2857	14.2857	14.2857	14.2857	14.2857	14.2857	14.2857	14.2857	14.2857	14.2857	14.2857	14.2857	14.2857	14.2857	14.2857	14.2857	14.2857	14.2857
	% head and feet in porcine carcass weight	%	Benhalima et al. 2015; CIQUAL		4.28571	4.28571	4.28571	4.28571	4.28571	4.28571	4.28571	4.28571	4.28571	4.28571	4.28571	4.28571	4.28571	4.28571	4.28571	4.28571	4.28571	4.28571	4.28571	4.28571	4.28571	4.28571	4.28571	4.28571	4.28571	4.28571	4.28571	4.28571	4.28571	4.28571	4.28571	4.28571	4.28571	4.28571
	% offals in porcine carcass weight	%	Benhalima et al. 2015; CIQUAL		3.57143	3.57143	3.57143	3.57143	3.57143	3.57143	3.57143	3.57143	3.57143	3.57143	3.57143	3.57143	3.57143	3.57143	3.57143	3.57143	3.57143	3.57143	3.57143	3.57143	3.57143	3.57143	3.57143	3.57143	3.57143	3.57143	3.57143	3.57143	3.57143	3.57143	3.57143	3.57143	3.57143	3.57143
	% unedible grease in porcine carcass weight	%	Benhalima et al. 2015; CIQUAL		4.42857	4.42857	4.42857	4.42857	4.42857	4.42857	4.42857	4.42857	4.42857	4.42857	4.42857	4.42857	4.42857	4.42857	4.42857	4.42857	4.42857	4.42857	4.42857	4.42857	4.42857	4.42857	4.42857	4.42857	4.42857	4.42857	4.42857	4.42857	4.42857	4.42857	4.42857	4.42857	4.42857	4.42857
	%N edible in porcine carcass weight	%			2.82857	2.82857	2.82857	2.82857	2.82857	2.82857	2.82857	2.82857	2.82857	2.82857	2.82857	2.82857	2.82857	2.82857	2.82857	2.82857	2.82857	2.82857	2.82857	2.82857	2.82857	2.82857	2.82857	2.82857	2.82857	2.82857	2.82857	2.82857	2.82857	2.82857	2.82857	2.82857	2.82857	2.23436
	%N non edible in porcine carcass weight	%			1.94831	1.94831	1.94831	1.94831	1.94831	1.94831	1.94831	1.94831	1.94831	1.94831	1.94831	1.94831	1.94831	1.94831	1.94831	1.94831	1.94831	1.94831	1.94831	1.94831	1.94831	1.94831	1.94831	1.94831	1.94831	1.94831	1.94831	1.94831	1.94831	1.94831	1.94831	1.94831	1.94831	0.894529
edible fraction	% boneless meat in poultry carcass weight	%	Benhalima et al. 2015; CIQUAL		67.1429	67.1429	67.1429	67.1429	67.1429	67.1429	67.1429	67.1429	67.1429	67.1429	67.1429	67.1429	67.1429	67.1429	67.1429	67.1429	67.1429	67.1429	67.1429	67.1429	67.1429	67.1429	67.1429	67.1429	67.1429	67.1429	67.1429	67.1429	67.1429	67.1429	67.1429	67.1429	67.1429	67.1429
	% bones in poultry carcass weight	%	Benhalima et al. 2015; CIQUAL		28.5714	28.5714	28.5714	28.5714	28.5714	28.5714	28.5714	28.5714	28.5714	28.5714	28.5714	28.5714	28.5714	28.5714	28.5714	28.5714	28.5714	28.5714	28.5714	28.5714	28.5714	28.5714	28.5714	28.5714	28.5714	28.5714	28.5714	28.5714	28.5714	28.5714	28.5714	28.5714	28.5714	28.5714
	% edible grease in poultry carcass weight	%	Benhalima et al. 2015; CIQUAL		4.28571	4.28571	4.28571	4.28571	4.28571	4.28571	4.28571	4.28571	4.28571	4.28571	4.28571	4.28571	4.28571	4.28571	4.28571	4.28571	4.28571	4.28571	4.28571	4.28571	4.28571	4.28571	4.28571	4.28571	4.28571	4.28571	4.28571	4.28571	4.28571	4.28571	4.28571	4.28571	4.28571	4.28571
non edible fraction	% skin in poultry carcass weight	%	Benhalima et al. 2015; CIQUAL		14.2857	14.2857	14.2857	14.2857	14.2857	14.2857	14.2857	14.2857	14.2857	14.2857	14.2857	14.2857	14.2857	14.2857	14.2857	14.2857	14.2857	14.2857	14.2857	14.2857	14.2857	14.2857	14.2857	14.2857	14.2857	14.2857	14.2857	14.2857	14.2857	14.2857	14.2857	14.2857	14.2857	14.2857
	% blood in poultry carcass weight	%	Benhalima et al. 2015; CIQUAL		4.85714	4.85714	4.85714	4.85714	4.85714	4.85714	4.85714	4.85714	4.85714	4.85714	4.85714	4.85714	4.85714	4.85714	4.85714	4.85714	4.85714	4.85714	4.85714	4.85714	4.85714	4.85714	4.85714	4.85714	4.85714	4.85714	4.85714	4.85714	4.85714	4.85714	4.85714	4.85714	4.85714	4.85714
	% casing in poultry carcass weight	%	Benhalima et al. 2015; CIQUAL		11.4286	11.4286	11.4286	11.4286	11.4286	11.4286	11.4286	11.4286	11.4286	11.4286	11.4286	11.4286	11.4286	11.4286	11.4286	11.4286	11.4286	11.4286	11.4286	11.4286	11.4286	11.4286	11.4286	11.4286	11.4286	11.4286	11.4286	11.4286	11.4286	11.4286	11.4286	11.4286	11.4286	11.4286
	% head and feet in poultry carcass weight	%	Benhalima et al. 2015; CIQUAL		4.28571	4.28571	4.28571	4.28571	4.28571	4.28571	4.28571	4.28571	4.28571	4.28571	4.28571	4.28571	4.28571	4.28571	4.28571	4.28571	4.28571	4.28571	4.28571	4.28571	4.28571	4.28571	4.28571	4.28571	4.28571	4.28571	4.28571	4.28571	4.28571	4.28571	4.28571	4.28571	4.28571	4.28571
	% offals in poultry carcass weight	%	Benhalima et al. 2015; CIQUAL		3.57143	3.57143	3.57143	3.57143	3.57143	3.57143	3.57143	3.57143	3.57143	3.57143	3.57143	3.57143	3.57143	3.57143	3.57143	3.57143	3.57143	3.57143	3.57143	3.57143	3.57143	3.57143	3.57143	3.57143	3.57143	3.57143	3.57143	3.57143	3.57143	3.57143	3.57143	3.57143	3.57143	3.57143
	% unedible grease in poultry carcass weight	%	Benhalima et al. 2015; CIQUAL		4.42857	4.42857	4.42857	4.42857	4.42857	4.42857	4.42857	4.42857	4.42857	4.42857	4.42857	4.42857	4.42857	4.42857	4.42857	4.42857	4.42857	4.42857	4.42857	4.42857	4.42857	4.42857	4.42857	4.42857	4.42857	4.42857	4.42857	4.42857	4.42857	4.42857	4.42857	4.42857	4.42857	4.42857
	%N edible in poultry carcass weight	%			2.07293	2.07293	2.07293	2.07293	2.07293	2.07293	2.07293	2.07293	2.07293	2.07293	2.07293	2.07293	2.07293	2.07293	2.07293	2.07293	2.07293	2.07293	2.07293	2.07293	2.07293	2.07293	2.07293	2.07293	2.07293	2.07293	2.07293	2.07293	2.07293	2.07293	2.07293	2.07293	2.07293	4.09132
	%N non edible in poultry carcass weight	%			2.83162	2.83162	2.83162	2.83162	2.83162	2.83162	2.83162	2.83162	2.83162	2.83162	2.83162	2.83162	2.83162	2.83162	2.83162	2.83162	2.83162	2.83162	2.83162	2.83162	2.83162	2.83162	2.83162	2.83162	2.83162	2.83162	2.83162	2.83162	2.83162	2.83162	2.83162	2.83162	2.83162	1.52378
edible fraction	% boneless meat in equine carcass weight	%	taken as bovine		69.2308	69.2308	69.2308	69.2308	69.2308	69.2308	69.2308	69.2308	69.2308	69.2308	69.2308	69.2308	69.2308	69.2308	69.2308	69.2308	69.2308	69.2308	69.2308	69.2308	69.2308	69.2308	69.2308	69.2308	69.2308	69.2308	69.2308	69.2308	69.2308	69.2308	69.2308	69.2308	69.2308	69.2308
	% bones in equine carcass weight	%	taken as bovine		19.2308	19.2308	19.2308	19.2308	19.2308	19.2308	19.2308	19.2308	19.2308	19.2308	19.2308	19.2308	19.2308	19.2308	19.2308	19.2308	19.2308	19.2308	19.2308	19.2308	19.2308	19.2308	19.2308	19.2308	19.2308	19.2308	19.2308	19.2308	19.2308	19.2308	19.2308	19.2308	19.2308	19.2308
	% edible grease in equine carcass weight	%	taken as bovine		11.5385	11.5385	11.5385	11.5385	11.5385	11.5385	11.5385	11.5385	11.5385	11.5385	11.5385	11.5385	11.5385	11.5385	11.5385	11.5385	11.5385	11.5385	11.5385	11.5385	11.5385	11.5385	11.5385	11.5385	11.5385	11.5385	11.5385	11.5385	11.5385	11.5385	11.5385	11.5385	11.5385	11.5385
non edible fraction	% skin in equine carcass weight	%	taken as bovine		15.3846	15.3846	15.3846	15.3846	15.3846	15.3846	15.3846	15.3846	15.3846	15.3846	15.3846	15.3846	15.3846	15.3846	15.3846	15.3846	15.3846	15.3846	15.3846	15.3846	15.3846	15.3846	15.3846	15.3846	15.3846	15.3846	15.3846	15.3846	15.3846	15.3846	15.3846	15.3846	15.3846	15.3846
	% blood in equine carcass weight	%	taken as bovine		7.69231	7.69231	7.69231	7.69231	7.69231	7.69231	7.69231	7.69231	7.69231	7.69231	7.69231	7.69231	7.69231	7.69231	7.69231	7.69231	7.69231	7.69231	7.69231	7.69231	7.69231	7.69231	7.69231	7.69231	7.69231	7.69231	7.69231	7.69231	7.69231	7.69231	7.69231	7.69231	7.69231	7.69231
	% casing in equine carcass weight	%	taken as bovine		48.0769	48.0769	48.0769	48.0769	48.0769	48.0769	48.0769	48.0769	48.0769	48.0769	48.0769	48.0769	48.0769	48.0769	48.0769	48.0769	48.0769	48.0769	48.0769	48.0769	48.0769	48.0769	48.0769	48.0769	48.0769	48.0769	48.0769	48.0769	48.0769	48.0769	48.0769	48.0769	48.0769	48.0769
	% head and feet in equine carcass weight	%	taken as bovine		5.76923	5.76923	5.76923	5.76923	5.76923	5.76923	5.76923	5.76923	5.76923	5.76923	5.76923	5.76923	5.76923	5.76923	5.76923	5.76923	5.76923	5.76923	5.76923	5.76923	5.76923	5.76923	5.76923	5.76923	5.76923	5.76923	5.76923	5.76923	5.76923	5.76923	5.76923	5.76923	5.76923	5.76923
	% offals in equine carcass weight	%	taken as bovine		5.76923	5.76923	5.76923	5.76923	5.76923	5.76923	5.76923	5.76923	5.76923	5.76923	5.76923	5.76923	5.76923	5.76923	5.76923	5.76923	5.76923	5.76923	5.76923	5.76923	5.76923	5.76923	5.76923	5.76923	5.76923	5.76923	5.76923	5.76923	5.76923	5.76923	5.76923	5.76923	5.76923	5.76923
	% unedible grease in equine carcass weight	%	taken as bovine		9.61538	9.61538	9.61538	9.61538	9.61538	9.61538	9.61538	9.61538	9.61538	9.61538	9.61538	9.61538	9.61538	9.61538	9.61538	9.61538	9.61538	9.61538	9.61538	9.61538	9.61538	9.61538	9.61538	9.61538	9.61538	9.61538	9.61538	9.61538	9.61538	9.61538	9.61538	9.61538	9.61538	9.61538
	%N edible in equine carcass weight	%			2.26788	2.26788	2.26788	2.26788	2.26788	2.26788	2.26788	2.26788	2.26788	2.26788	2.26788	2.26788	2.26788	2.26788	2.26788	2.26788	2.26788	2.26788	2.26788	2.26788	2.26788	2.26788	2.26788	2.26788	2.26788	2.26788	2.26788	2.26788	2.26788	2.26788	2.26788	2.26788	2.26788	2.5105
	%N non edible in equine carcass weight	%			2.7745	2.7745	2.7745	2.7745	2.7745	2.7745	2.7745	2.7745	2.7745	2.7745	2.7745	2.7745	2.7745	2.7745	2.7745	2.7745	2.7745	2.7745	2.7745	2.7745	2.7745	2.7745	2.7745	2.7745	2.7745	2.7745	2.7745	2.7745	2.7745	2.7745	2.7745	2.7745	2.7745	5.21346
	edible animal N production	ktN/yr			0	0	0	0	6.16685	3.2401	3.11853	0	0	0	9.27389	0	23.4004	14.2827	24.0934	0	15.5472	1.88579	1.54551	2.64754	2.3921	4.49262	4.04051	14.7755	0	3.85861	0	5.38618	1.84567	0	0	0	0	141.993
	Dairy products	ktN/yr			0	0	0	0	15.7703	7.44078	10.6966	0	0	0	25.6453	0	38.5831	14.4551	34.75	0	19.2137	12.2684	6.04429	7.19765	2.38568	7.22125	5.58701	17.6846	0	5.09643	0	4.77052	4.5219	0	0	0	0	239.333
	non edible animal N production	ktN/yr			0	0	0	0	7.66642	4.03364	3.73552	0	0	0	11.5044	0	27.3713	18.216	30.4077	0	19.5082	2.30565	1.98447	3.25001	3.07527	5.68864	5.02351	18.8965	0	4.71614	0	6.84188	2.26466	0	0	0	0	176.49
	total edible animal N production (dairy products + meat)	ktN/yr			0	0	0	0	21.9372	10.6809	13.8151	0	0	0	34.9192	0	61.9835	28.7379	58.8433	0	34.7609	14.1542	7.5898	9.84519	4.77778	11.7139	9.62752	32.46	0	8.95504	0	10.1567	6.36757	0	0	0	0	381.326
	total animal N production	ktN/yr			0	0	0	0	29.6036	14.7145	17.5507	0	0	0	46.4236	0	89.3548	46.9538	89.2511	0	54.2691	16.4598	9.57427	13.0952	7.85304	17.4025	14.651	51.3565	0	13.6712	0	16.9986	8.63223	0	0	0	0	557.816
	Livestock numbers
	Milking cows	heads	Agreste (data for 2014)		0	0	0	0	478902	222982	342894	0	0	0	732019	0	751245	362736	914511	0	619998	400040	218297	206803	49448.1	202727	171062	469830	0	147792	0	141532	153578	0	0	0	0	0
	Suckler cows	heads	Agreste (data for 2014)		0	0	0	0	251151	117690	67306.9	0	0	0	527918	0	136526	609324	780613	0	2.41662e+06	50222.6	23562.5	101833	76786.6	163179	503412	1.25326e+06	0	408119	0	352163	520801	0	0	0	0	0
	Heifer for milking herd renewal over 2 yrs old	heads	Agreste (data for 2014)		0	0	0	0	126080	66143.1	84724.1	0	0	0	200571	0	123344	67093.9	193533	0	116665	115023	52126.6	44811.1	25066	48461.9	28868.8	84549.2	0	23545.6	0	25048.4	28576	0	0	0	0	0
	Heifer for suckler cows renewal over 2 yrs old	heads	Agreste (data for 2014)		0	0	0	0	64136.2	34795.1	19703	0	0	0	129242	0	31617.4	168455	218982	0	432421	10074.3	4771.1	23441.4	18683.2	36382.2	73262.6	257568	0	106812	0	58510.6	77272.2	0	0	0	0	0
	Heifer for slaughter over 2 yrs old	heads	Agreste (data for 2014)		0	0	0	0	36060.3	13742.1	12646.2	0	0	0	49593.4	0	22148.4	49506.1	64209.7	0	159599	13349.6	6019.2	19109	9249.5	25913.2	10004.9	27173	0	7836.26	0	12401.8	7549.57	0	0	0	0	0
	Males of milking type over 2 yrs old	heads	Agreste (data for 2014)		0	0	0	0	37621.3	38339.7	22979.1	0	0	0	50443.7	0	11662	3951.4	31083	0	6790.86	6553.22	2421.41	1661.89	798.006	2765.07	1033.87	5221.08	0	662.582	0	3077.44	1060.11	0	0	0	0	0
	Males of butcher type over 2 yrs old	heads	Agreste (data for 2014)		0	0	0	0	37385.9	22268.9	12345.7	0	0	0	38436.6	0	12963.8	27305.9	56214.6	0	133181	5308.71	2139.34	7415.48	4381.67	12175.3	22141.2	65523.5	0	16490.4	0	20158.6	23646.4	0	0	0	0	0
	Heifer for milking herd renewal between 1 and 2 yrs old	heads	Agreste (data for 2014)		0	0	0	0	147153	76962.9	103995	0	0	0	244236	0	240310	110907	305893	0	141175	153137	53903	55005.6	22748.1	56064.6	40238.6	109588	0	32628.7	0	30935.8	34450.9	0	0	0	0	0
	Heifer for suckler cows renewal between 1 and 2 yrs old	heads	Agreste (data for 2014)		0	0	0	0	68660.3	40659.4	22533.8	0	0	0	161422	0	36664.7	181436	245914	0	542810	12317.1	5075.91	29460.5	17472.6	43376.2	84313.1	218649	0	78664.8	0	57107.3	93795.3	0	0	0	0	0
	Heifer for slaughter between 1 and 2 yrs old	heads	Agreste (data for 2014)		0	0	0	0	33321.4	11312.1	12818.2	0	0	0	54486.8	0	27853.4	46863	63662.9	0	214773	14694.4	4786.41	19216.2	8593.91	26112	14896.4	19560	0	6851.6	0	11962	11076.9	0	0	0	0	0
	Males of milking type between 1 and 2 yrs old	heads	Agreste (data for 2014)		0	0	0	0	71302	53229.7	52056.5	0	0	0	168266	0	43572.3	26482.9	95665.3	0	14877.4	21356.7	2581.03	8137.34	1534.63	5546.4	1449.51	3706.39	0	376.907	0	636.533	1011.27	0	0	0	0	0
	Males of butcher type between 1 and 2 yrs old	heads	Agreste (data for 2014)		0	0	0	0	90099.8	38119.9	32257.1	0	0	0	161677	0	42618.4	99623.2	170627	0	170562	13755.5	2284.09	16178.8	4870.29	21923.1	15616.7	29995	0	7983.7	0	13272.4	12662.4	0	0	0	0	0
	Veal calves	heads	Agreste (data for 2014)		0	0	0	0	35409.3	12525.5	43622.8	0	0	0	34525.9	0	194536	92906.9	188387	0	103474	23390.5	16920.6	33258.3	6202.35	67884.3	49428.9	213545	0	115330	0	165704	58207.3	0	0	0	0	0
	Other females under 1 yr	heads	Agreste (data for 2014)		0	0	0	0	267882	135130	146084	0	0	0	496707	0	317025	375928	665458	0	1.16941e+06	187915	68907.7	106661	53353.5	127470	240191	504708	0	148914	0	135377	214554	0	0	0	0	0
	Other males under 1 yr	heads	Agreste (data for 2014)		0	0	0	0	213511	115125	99821.4	0	0	0	451998	0	116491	286436	471928	0	940154	57524.7	13464.9	60834.1	30018.5	64253.6	196777	297936	0	72204.4	0	90151.8	154973	0	0	0	0	0
	kid goats	heads	Agreste (data for 2014)		0	0	0	0	1420.51	537.995	446.082	0	0	0	4024.5	0	6982.58	103182	151047	0	46573.1	1813.99	8123.99	16880.2	22065.5	62769.8	36872.7	60000.7	0	5950.34	0	33302.1	3592.13	0	0	0	0	0
	female goats	heads	Agreste (data for 2014)		0	0	0	0	5880.94	3048.27	2051.18	0	0	0	14774	0	22787.6	298005	405417	0	158196	7407.66	32873.8	55103.6	76379	239786	112560	203477	0	23012.5	0	107696	11589.9	0	0	0	0	0
	Other caprines (including male goats)	heads	Agreste (data for 2014)		0	0	0	0	871.527	923.321	425.356	0	0	0	1950.33	0	1672.47	38494.9	55631.1	0	17804.6	885.665	3527.82	5416.94	20215.3	40949.2	17082.9	44743.3	0	2071.15	0	11812	941.698	0	0	0	0	0
	ewe lambs	heads	Agreste (data for 2014)		0	0	0	0	18355.7	11844.7	7006.6	0	0	0	115846	0	11075.1	54386.6	110263	0	380005	8244.95	20667.1	14397.6	414261	103423	545835	517069	0	358336	0	146427	23363	0	0	0	0	0
	Sheep	heads	Agreste (data for 2014)		0	0	0	0	95965.9	76196.3	59722.1	0	0	0	623191	0	61795.9	291100	529251	0	1.96914e+06	58849.2	117160	89653.6	2.39935e+06	661287	1.8586e+06	2.35673e+06	0	1.55799e+06	0	788799	149677	0	0	0	0	0
	other ovines (incl. rams)	heads	Agreste (data for 2014)		0	0	0	0	33179.5	22742.6	8654.33	0	0	0	187718	0	17563	75784.3	171513	0	558104	11008.8	27755.5	24245.4	891213	167982	523401	812761	0	240599	0	265518	31799.2	0	0	0	0	0
	piglets	heads	Agreste (data for 2014)		0	0	0	0	152974	71625.3	222562	0	0	0	128939	0	4.01725e+06	440223	1.10939e+06	0	356380	52009.3	7882.16	149919	19590.4	75460.2	171143	313656	0	212185	0	150395	76365.4	0	0	0	0	0
	young pigs between 20 and 50 kg	heads	Agreste (data for 2014)		0	0	0	0	56161.3	45207.3	82158.1	0	0	0	101326	0	1.62547e+06	189325	450912	0	154572	46454.7	6775.75	77326.5	37227.6	58501.6	63178.1	157981	0	124611	0	73553.8	29670.1	0	0	0	0	0
	Sows over 50 kg	heads	Agreste (data for 2014)		0	0	0	0	32402.9	19908.7	48936.2	0	0	0	42290.5	0	823623	95997	259877	0	86577.7	10656.1	3464.84	39008.5	7910.08	8943.99	39862.2	93688.6	0	55857.4	0	41062.3	15975.4	0	0	0	0	0
	Boars over 50 kg	heads	Agreste (data for 2014)		0	0	0	0	707.277	251.284	641.567	0	0	0	1980.03	0	9983.18	1140.04	5565.73	0	2603.99	489.446	47.23	639.381	238.174	339.384	840.988	2314.69	0	1427.45	0	1659.52	534.349	0	0	0	0	0
	fattening pigs over 50 kg	heads	Agreste (data for 2014)		0	0	0	0	170139	75825.9	223683	0	0	0	150308	0	4.31263e+06	450667	1.18261e+06	0	415682	112205	41705.8	180170	37122	174107	218684	469758	0	322176	0	163891	84386	0	0	0	0	0
	Laying hens for hatching eggs	heads	Agreste (data for 2014)		0	0	0	0	186194	205431	69975.7	0	0	0	220796	0	5.11632e+06	2.18992e+06	4.17328e+06	0	527668	87076.8	96360.1	119256	5804.65	272775	80661.6	497651	0	95563.2	0	243650	65414.4	0	0	0	0	0
	Laying hens for consumption eggs	heads	Agreste (data for 2014)		0	0	0	0	1.62439e+06	566454	610481	0	0	0	1.59869e+06	0	2.43241e+07	5.17723e+06	7.99385e+06	0	3.85872e+06	475330	2.21269e+06	2.73844e+06	2.0671e+06	6.26365e+06	924425	4.70184e+06	0	847877	0	1.455e+06	484220	0	0	0	0	0
	young hens	heads	Agreste (data for 2014)		0	0	0	0	1.03019e+06	234105	387166	0	0	0	1.59937e+06	0	1.49468e+07	2.65506e+06	4.6245e+06	0	1.36483e+06	74144.6	813375	1.00664e+06	234766	2.30249e+06	268182	1.08608e+06	0	177334	0	369029	2.23693e+06	0	0	0	0	0
	chickens	heads	Agreste (data for 2014)		0	0	0	0	5.08297e+06	2.22765e+06	1.91029e+06	0	0	0	1.58488e+06	0	6.0885e+07	2.71218e+07	4.8306e+07	0	1.59702e+07	534818	3.25136e+06	4.0239e+06	2.39409e+06	9.2039e+06	3.50707e+06	1.87133e+07	0	3.43289e+06	0	7.60583e+06	2.42391e+06	0	0	0	0	0
	Duck for 'foie gras'	heads	Agreste (data for 2014)		0	0	0	0	19231.3	26831	7227.54	0	0	0	34580.9	0	882443	2.10819e+06	3.11584e+06	0	352682	8908.84	13423.7	16613.3	15479.1	37999.7	1.58111e+06	1.08739e+07	0	2.14956e+06	0	4.84211e+06	5.94368e+06	0	0	0	0	0
	Ducks for roasting	heads	Agreste (data for 2014)		0	0	0	0	148387	55163.9	55767	0	0	0	35469.5	0	3.46279e+06	7.17218e+06	1.36008e+07	0	745553	11207.9	281727	348667	24508.5	797509	99654.2	621452	0	119700	0	263404	31833	0	0	0	0	0
	Turkeys	heads	Agreste (data for 2014)		0	0	0	0	1.01402e+06	537234	381088	0	0	0	89963.3	0	1.49047e+07	5.8787e+06	1.03007e+07	0	1.80712e+06	102883	1.06749e+06	1.32112e+06	8384.49	3.02182e+06	226146	948116	0	157507	0	215931	403604	0	0	0	0	0
	Gooses	heads	Agreste (data for 2014)		0	0	0	0	12893.7	6007.95	4845.74	0	0	0	13624.7	0	58639.2	125625	195932	0	42202.1	1724.29	9405.16	11639.9	5804.65	26624	83828.7	575301	0	113666	0	150441	992555	0	0	0	0	0
	Guinea fowls	heads	Agreste (data for 2014)		0	0	0	0	449532	202564	168944	0	0	0	62335.6	0	1.96057e+06	3.92244e+06	6.3147e+06	0	1.13584e+06	35635.4	241627	299039	107708	683994	335569	2.04125e+06	0	390381	0	706915	160912	0	0	0	0	0
	quails	heads	Agreste (data for 2014)		0	0	0	0	12675.2	119067	4763.6	0	0	0	1.08522e+06	0	330092	3.38218e+06	5.45911e+06	0	369495	3735.97	280103	346656	166400	792910	494641	3.42941e+06	0	679287	0	1.62598e+06	227410	0	0	0	0	0
	mother rabbits	heads	Agreste (data for 2014)		0	0	0	0	48296.8	7783.03	18151	0	0	0	54257.5	0	189754	346044	540432	0	122601	18967.2	27275	33755.6	11609.3	77209.5	37914.8	231049	0	44210.3	0	28199.7	276025	0	0	0	0	0
	horses	heads	Agreste (data for 2014)		0	0	0	0	89515.1	19175.4	20569	0	0	0	91485.8	0	38977.9	81288.1	71059.4	0	125719	34197.8	4936.75	66694.3	8626.66	104681	21894.1	214851	0	16933.8	0	33724.1	15914.4	0	0	0	0	0
	donkeys etc	heads	Agreste (data for 2014)		0	0	0	0	0	0	0	0	0	0	0	0	0	0	0	0	0	0	0	0	0	0	0	0	0	0	0	0	0	0	0	0	0	0
	kgN excreted per head
	Milking cows	kgN/head	interpolation and compilation of various sources, including CORPEN 1999; MEEM 2010; CITEPA 2013		110	110	110	110	110	110	110	110	110	110	110	110	110	110	110	110	110	110	110	110	110	110	110	110	110	110	110	110	110	110	110	110	110	110
	Suckler cows	kgN/head	interpolation and compilation of various sources, including CORPEN 1999; MEEM 2010; CITEPA 2014		98	98	98	98	98	98	98	98	98	98	98	98	98	98	98	98	98	98	98	98	98	98	98	98	98	98	98	98	98	98	98	98	98	98
	Heifer for milking herd renewal over 2 yrs old	kgN/head	interpolation and compilation of various sources, including CORPEN 1999; MEEM 2010; CITEPA 2015		59	59	59	59	59	59	59	59	59	59	59	59	59	59	59	59	59	59	59	59	59	59	59	59	59	59	59	59	59	59	59	59	59	59
	Heifer for suckler cows renewal over 2 yrs old	kgN/head	interpolation and compilation of various sources, including CORPEN 1999; MEEM 2010; CITEPA 2016		59	59	59	59	59	59	59	59	59	59	59	59	59	59	59	59	59	59	59	59	59	59	59	59	59	59	59	59	59	59	59	59	59	59
	Heifer for slaughter over 2 yrs old	kgN/head	interpolation and compilation of various sources, including CORPEN 1999; MEEM 2010; CITEPA 2017		59	59	59	59	59	59	59	59	59	59	59	59	59	59	59	59	59	59	59	59	59	59	59	59	59	59	59	59	59	59	59	59	59	59
	Males of milking type over 2 yrs old	kgN/head	interpolation and compilation of various sources, including CORPEN 1999; MEEM 2010; CITEPA 2018		89	89	89	89	89	89	89	89	89	89	89	89	89	89	89	89	89	89	89	89	89	89	89	89	89	89	89	89	89	89	89	89	89	89
	Males of butcher type over 2 yrs old	kgN/head	interpolation and compilation of various sources, including CORPEN 1999; MEEM 2010; CITEPA 2019		89	89	89	89	89	89	89	89	89	89	89	89	89	89	89	89	89	89	89	89	89	89	89	89	89	89	89	89	89	89	89	89	89	89
	Heifer for milking herd renewal between 1 and 2 yrs old	kgN/head	interpolation and compilation of various sources, including CORPEN 1999; MEEM 2010; CITEPA 2020		51	51	51	51	51	51	51	51	51	51	51	51	51	51	51	51	51	51	51	51	51	51	51	51	51	51	51	51	51	51	51	51	51	51
	Heifer for suckler cows renewal between 1 and 2 yrs old	kgN/head	interpolation and compilation of various sources, including CORPEN 1999; MEEM 2010; CITEPA 2021		51	51	51	51	51	51	51	51	51	51	51	51	51	51	51	51	51	51	51	51	51	51	51	51	51	51	51	51	51	51	51	51	51	51
	Heifer for slaughter between 1 and 2 yrs old	kgN/head	interpolation and compilation of various sources, including CORPEN 1999; MEEM 2010; CITEPA 2022		51	51	51	51	51	51	51	51	51	51	51	51	51	51	51	51	51	51	51	51	51	51	51	51	51	51	51	51	51	51	51	51	51	51
	Males of milking type between 1 and 2 yrs old	kgN/head	interpolation and compilation of various sources, including CORPEN 1999; MEEM 2010; CITEPA 2023		72	72	72	72	72	72	72	72	72	72	72	72	72	72	72	72	72	72	72	72	72	72	72	72	72	72	72	72	72	72	72	72	72	72
	Males of butcher type between 1 and 2 yrs old	kgN/head	interpolation and compilation of various sources, including CORPEN 1999; MEEM 2010; CITEPA 2024		72	72	72	72	72	72	72	72	72	72	72	72	72	72	72	72	72	72	72	72	72	72	72	72	72	72	72	72	72	72	72	72	72	72
	Veal calves	kgN/head	interpolation and compilation of various sources, including CORPEN 1999; MEEM 2010; CITEPA 2025		6	6	6	6	6	6	6	6	6	6	6	6	6	6	6	6	6	6	6	6	6	6	6	6	6	6	6	6	6	6	6	6	6	6
	Other females under 1 yr	kgN/head	interpolation and compilation of various sources, including CORPEN 1999; MEEM 2010; CITEPA 2026		20	20	20	20	20	20	20	20	20	20	20	20	20	20	20	20	20	20	20	20	20	20	20	20	20	20	20	20	20	20	20	20	20	20
	Other males under 1 yr	kgN/head	interpolation and compilation of various sources, including CORPEN 1999; MEEM 2010; CITEPA 2027		12	12	12	12	12	12	12	12	12	12	12	12	12	12	12	12	12	12	12	12	12	12	12	12	12	12	12	12	12	12	12	12	12	12
	kid goats	kgN/head	interpolation and compilation of various sources, including CORPEN 1999; MEEM 2010; CITEPA 2029		7.6	7.6	7.6	7.6	7.6	7.6	7.6	7.6	7.6	7.6	7.6	7.6	7.6	7.6	7.6	7.6	7.6	7.6	7.6	7.6	7.6	7.6	7.6	7.6	7.6	7.6	7.6	7.6	7.6	7.6	7.6	7.6	7.6	7.6
	female goats	kgN/head	interpolation and compilation of various sources, including CORPEN 1999; MEEM 2010; CITEPA 2030		15.3	15.3	15.3	15.3	15.3	15.3	15.3	15.3	15.3	15.3	15.3	15.3	15.3	15.3	15.3	15.3	15.3	15.3	15.3	15.3	15.3	15.3	15.3	15.3	15.3	15.3	15.3	15.3	15.3	15.3	15.3	15.3	15.3	15.3
	Other caprines (including male goats)	kgN/head	interpolation and compilation of various sources, including CORPEN 1999; MEEM 2010; CITEPA 2031		6.3	6.3	6.3	6.3	6.3	6.3	6.3	6.3	6.3	6.3	6.3	6.3	6.3	6.3	6.3	6.3	6.3	6.3	6.3	6.3	6.3	6.3	6.3	6.3	6.3	6.3	6.3	6.3	6.3	6.3	6.3	6.3	6.3	6.3
	ewe lambs	kgN/head	interpolation and compilation of various sources, including CORPEN 1999; MEEM 2010; CITEPA 2033		7.1	7.1	7.1	7.1	7.1	7.1	7.1	7.1	7.1	7.1	7.1	7.1	7.1	7.1	7.1	7.1	7.1	7.1	7.1	7.1	7.1	7.1	7.1	7.1	7.1	7.1	7.1	7.1	7.1	7.1	7.1	7.1	7.1	7.1
	Sheep	kgN/head	interpolation and compilation of various sources, including CORPEN 1999; MEEM 2010; CITEPA 2034		15.3	15.3	15.3	15.3	15.3	15.3	15.3	15.3	15.3	15.3	15.3	15.3	15.3	15.3	15.3	15.3	15.3	15.3	15.3	15.3	15.3	15.3	15.3	15.3	15.3	15.3	15.3	15.3	15.3	15.3	15.3	15.3	15.3	15.3
	other ovines (incl. rams)	kgN/head	interpolation and compilation of various sources, including CORPEN 1999; MEEM 2010; CITEPA 2035		6.3	6.3	6.3	6.3	6.3	6.3	6.3	6.3	6.3	6.3	6.3	6.3	6.3	6.3	6.3	6.3	6.3	6.3	6.3	6.3	6.3	6.3	6.3	6.3	6.3	6.3	6.3	6.3	6.3	6.3	6.3	6.3	6.3	6.3
	piglets	kgN/head	interpolation and compilation of various sources, including CORPEN 1999; MEEM 2010; CITEPA 2037		3.8	3.8	3.8	3.8	3.8	3.8	3.8	3.8	3.8	3.8	3.8	3.8	3.8	3.8	3.8	3.8	3.8	3.8	3.8	3.8	3.8	3.8	3.8	3.8	3.8	3.8	3.8	3.8	3.8	3.8	3.8	3.8	3.8	3.8
	young pigs between 20 and 50 kg	kgN/head	interpolation and compilation of various sources, including CORPEN 1999; MEEM 2010; CITEPA 2038		3.8	3.8	3.8	3.8	3.8	3.8	3.8	3.8	3.8	3.8	3.8	3.8	3.8	3.8	3.8	3.8	3.8	3.8	3.8	3.8	3.8	3.8	3.8	3.8	3.8	3.8	3.8	3.8	3.8	3.8	3.8	3.8	3.8	3.8
	Sows over 50 kg	kgN/head	interpolation and compilation of various sources, including CORPEN 1999; MEEM 2010; CITEPA 2039		22.2	22.2	22.2	22.2	22.2	22.2	22.2	22.2	22.2	22.2	22.2	22.2	22.2	22.2	22.2	22.2	22.2	22.2	22.2	22.2	22.2	22.2	22.2	22.2	22.2	22.2	22.2	22.2	22.2	22.2	22.2	22.2	22.2	22.2
	Boars over 50 kg	kgN/head	interpolation and compilation of various sources, including CORPEN 1999; MEEM 2010; CITEPA 2040		22.2	22.2	22.2	22.2	22.2	22.2	22.2	22.2	22.2	22.2	22.2	22.2	22.2	22.2	22.2	22.2	22.2	22.2	22.2	22.2	22.2	22.2	22.2	22.2	22.2	22.2	22.2	22.2	22.2	22.2	22.2	22.2	22.2	22.2
	fattening pigs over 50 kg	kgN/head	interpolation and compilation of various sources, including CORPEN 1999; MEEM 2010; CITEPA 2041		12.2	12.2	12.2	12.2	12.2	12.2	12.2	12.2	12.2	12.2	12.2	12.2	12.2	12.2	12.2	12.2	12.2	12.2	12.2	12.2	12.2	12.2	12.2	12.2	12.2	12.2	12.2	12.2	12.2	12.2	12.2	12.2	12.2	12.2
	Laying hens for hatching eggs	kgN/head	interpolation and compilation of various sources, including CORPEN 1999; MEEM 2010; CITEPA 2043		0.713	0.713	0.713	0.713	0.713	0.713	0.713	0.713	0.713	0.713	0.713	0.713	0.713	0.713	0.713	0.713	0.713	0.713	0.713	0.713	0.713	0.713	0.713	0.713	0.713	0.713	0.713	0.713	0.713	0.713	0.713	0.713	0.713	0.713
	Laying hens for consumption eggs	kgN/head	interpolation and compilation of various sources, including CORPEN 1999; MEEM 2010; CITEPA 2044		0.713	0.713	0.713	0.713	0.713	0.713	0.713	0.713	0.713	0.713	0.713	0.713	0.713	0.713	0.713	0.713	0.713	0.713	0.713	0.713	0.713	0.713	0.713	0.713	0.713	0.713	0.713	0.713	0.713	0.713	0.713	0.713	0.713	0.713
	young hens	kgN/head	interpolation and compilation of various sources, including CORPEN 1999; MEEM 2010; CITEPA 2045		0.313	0.313	0.313	0.313	0.313	0.313	0.313	0.313	0.313	0.313	0.313	0.313	0.313	0.313	0.313	0.313	0.313	0.313	0.313	0.313	0.313	0.313	0.313	0.313	0.313	0.313	0.313	0.313	0.313	0.313	0.313	0.313	0.313	0.313
	chickens	kgN/head	interpolation and compilation of various sources, including CORPEN 1999; MEEM 2010; CITEPA 2046		0.314	0.314	0.314	0.314	0.314	0.314	0.314	0.314	0.314	0.314	0.314	0.314	0.314	0.314	0.314	0.314	0.314	0.314	0.314	0.314	0.314	0.314	0.314	0.314	0.314	0.314	0.314	0.314	0.314	0.314	0.314	0.314	0.314	0.314
	Duck for 'foie gras'	kgN/head	interpolation and compilation of various sources, including CORPEN 1999; MEEM 2010; CITEPA 2047		0.609	0.609	0.609	0.609	0.609	0.609	0.609	0.609	0.609	0.609	0.609	0.609	0.609	0.609	0.609	0.609	0.609	0.609	0.609	0.609	0.609	0.609	0.609	0.609	0.609	0.609	0.609	0.609	0.609	0.609	0.609	0.609	0.609	0.609
	Ducks for roasting	kgN/head	interpolation and compilation of various sources, including CORPEN 1999; MEEM 2010; CITEPA 2048		0.609	0.609	0.609	0.609	0.609	0.609	0.609	0.609	0.609	0.609	0.609	0.609	0.609	0.609	0.609	0.609	0.609	0.609	0.609	0.609	0.609	0.609	0.609	0.609	0.609	0.609	0.609	0.609	0.609	0.609	0.609	0.609	0.609	0.609
	Turkeys	kgN/head	interpolation and compilation of various sources, including CORPEN 1999; MEEM 2010; CITEPA 2049		0.991	0.991	0.991	0.991	0.991	0.991	0.991	0.991	0.991	0.991	0.991	0.991	0.991	0.991	0.991	0.991	0.991	0.991	0.991	0.991	0.991	0.991	0.991	0.991	0.991	0.991	0.991	0.991	0.991	0.991	0.991	0.991	0.991	0.991
	Gooses	kgN/head	interpolation and compilation of various sources, including CORPEN 1999; MEEM 2010; CITEPA 2050		1.428	1.428	1.428	1.428	1.428	1.428	1.428	1.428	1.428	1.428	1.428	1.428	1.428	1.428	1.428	1.428	1.428	1.428	1.428	1.428	1.428	1.428	1.428	1.428	1.428	1.428	1.428	1.428	1.428	1.428	1.428	1.428	1.428	1.428
	Guinea fowls	kgN/head	interpolation and compilation of various sources, including CORPEN 1999; MEEM 2010; CITEPA 2051		0.316	0.316	0.316	0.316	0.316	0.316	0.316	0.316	0.316	0.316	0.316	0.316	0.316	0.316	0.316	0.316	0.316	0.316	0.316	0.316	0.316	0.316	0.316	0.316	0.316	0.316	0.316	0.316	0.316	0.316	0.316	0.316	0.316	0.316
	quails	kgN/head	interpolation and compilation of various sources, including CORPEN 1999; MEEM 2010; CITEPA 2052		0.148	0.148	0.148	0.148	0.148	0.148	0.148	0.148	0.148	0.148	0.148	0.148	0.148	0.148	0.148	0.148	0.148	0.148	0.148	0.148	0.148	0.148	0.148	0.148	0.148	0.148	0.148	0.148	0.148	0.148	0.148	0.148	0.148	0.148
	mother rabbits	kgN/head	interpolation and compilation of various sources, including CORPEN 1999; MEEM 2010; CITEPA 2053		0.974	0.974	0.974	0.974	0.974	0.974	0.974	0.974	0.974	0.974	0.974	0.974	0.974	0.974	0.974	0.974	0.974	0.974	0.974	0.974	0.974	0.974	0.974	0.974	0.974	0.974	0.974	0.974	0.974	0.974	0.974	0.974	0.974	0.974
	horses	kgN/head	Nopolu-Agri, 2010		120	120	120	120	120	120	120	120	120	120	120	120	120	120	120	120	120	120	120	120	120	120	120	120	120	120	120	120	120	120	120	120	120	120
	donkeys etc	kgN/head	Nopolu-Agri, 2010		40.7933	40.7933	40.7933	40.7933	40.7933	40.7933	40.7933	40.7933	40.7933	40.7933	40.7933	40.7933	40.7933	40.7933	40.7933	40.7933	40.7933	40.7933	40.7933	40.7933	40.7933	40.7933	40.7933	40.7933	40.7933	40.7933	40.7933	40.7933	40.7933	40.7933	40.7933	40.7933	40.7933	40.7933
	bovines N excretion	ktonN/yr			0	0	0	0	129.777	65.534	71.9242	0	0	0	225.342	0	139.315	157.107	283.657	0	453.778	74.4549	35.6834	48.7915	20.9675	58.2646	92.6321	237.7	0	77.0969	0	68.6955	91.4114	0	0	0	0	2332.13
	ovines N excretion	ktonN/yr			0	0	0	0	0.106265	0.0565443	0.037453	0	0	0	0.268915	0	0.412255	5.58617	7.70131	0	2.88652	0.132703	0.586937	1.0055	1.46365	4.40375	2.11002	3.85108	0	0.410362	0	1.97526	0.210558	0	0	0	0	33.2053
	caprines N excretion	ktonN/yr			0	0	0	0	1.80763	1.39318	1.01802	0	0	0	11.5399	0	1.13476	5.31742	9.96094	0	36.3419	1.02829	2.11414	1.62667	45.2659	11.9103	35.6094	44.8495	0	27.8972	0	14.781	2.65627	0	0	0	0	256.252
	porcines N excretion	ktonN/yr			0	0	0	0	3.60546	1.81659	4.9875	0	0	0	3.69157	0	92.5624	10.0469	26.2498	0	8.99276	1.9905	0.642479	3.94179	0.849688	2.83925	4.46198	9.65455	0	6.48209	0	3.7989	1.79896	0	0	0	0	188.413
	poultry N excretion	ktonN/yr			0	0	0	0	4.5258	2.00324	1.70089	0	0	0	2.67997	0	63.141	28.3341	49.2887	0	11.6223	0.739094	4.3173	5.34311	2.41413	12.2213	3.48537	20.0626	0	3.77344	0	7.74445	7.66294	0	0	0	0	231.06
	equine N excretion	ktonN/yr			0	0	0	0	10.7418	2.30105	2.46828	0	0	0	10.9783	0	4.67735	9.75457	8.52713	0	15.0862	4.10373	0.59241	8.00332	1.0352	12.5617	2.62729	25.7821	0	2.03206	0	4.04689	1.90973	0	0	0	0	127.229
	Total livestock N excretion	ktonN/yr			0	0	0	0	150.564	73.1046	82.1363	0	0	0	254.501	0	301.243	216.146	385.385	0	528.708	82.4493	43.9366	68.7119	71.9961	102.201	140.926	341.9	0	117.692	0	101.042	105.65	0	0	0	0	3168.29
	excretion management
bovines	% excretion on grassland	%	Nopolu-volet Agricole report, MEEM 2010		49.0867	50.3622	50.522	46.636	59.4644	50.2438	58.3566	43.4333	48.4485	52.6611	47.4103	24.1245	56.7512	51.8327	53.2259	53.5392	56.8075	41.7283	47.3676	50.9463	42.3506	52.2108	49.4208	47.6253	46.2813	47.5334	45.8553	47.6041	54.6012	50.3461	41.353	59.8764	58.2625	49.5839
	% excretion in the barn	%	Nopolu-volet Agricole report, MEEM 2010		50.9133	49.6378	49.478	53.364	40.5356	49.7562	41.6434	56.5667	51.5515	47.3389	52.5897	75.8755	43.2488	48.1673	46.7741	46.4608	43.1925	58.2717	52.6324	49.0537	57.6494	47.7892	50.5792	52.3747	53.7187	52.4666	54.1447	52.3959	45.3988	49.6539	58.647	40.1236	41.7375	50.4161
	% excretion in the barn as litter manure	%	Nopolu-volet Agricole report, MEEM 2010		62.5258	72.3828	64.4179	72.2941	62.3372	70.2761	57.2937	70.9069	65.2966	66.3351	37.7701	25.9211	44.4395	44.7892	40.9859	68.035	59.8888	35.6867	33.6941	40.7143	36.8889	43.4905	58.6128	54.1285	54.5673	55.9037	53.9465	55.5515	56.3246	52.1379	35.3534	88.4557	84.3843	55.3253
	% excretion in the barn as other manure	%	Nopolu-volet Agricole report, MEEM 2010		31.1755	13.8086	29.8422	20.4656	30.4466	14.862	34.2196	21.5417	23.7917	22.2185	40.2827	51.113	35.5605	45.3272	47.246	26.8268	24.2075	28.0457	38.5728	35.2684	45.2368	33.8278	34.1267	35.9759	30.4015	32.0897	30.383	32.9062	26.3841	41.5525	45.6518	10.6095	14.6279	31.1696
	% excretion in the barn as slurry	%	Nopolu-volet Agricole report, MEEM 2010		6.29871	13.8086	5.73989	7.24023	7.21617	14.862	8.48669	7.55135	10.9118	11.4464	21.9473	22.9659	20	9.88358	11.7681	5.1382	15.9038	36.2676	27.7331	24.0173	17.8743	22.6817	7.26051	9.8956	15.0312	12.0066	15.6706	11.5423	17.2913	6.30961	18.9948	0.934813	0.987821	13.5051
	% NH3 volatilisation from litter manure	%	Nopolu-volet Agricole report, MEEM 2010		26	26	26	26	26	26	26	26	26	26	26	26	26	26	26	26	26	26	26	26	26	26	26	26	26	26	26	26	26	26	26	26	26	26
	% NH3 volatilisation from other manure	%	Nopolu-volet Agricole report, MEEM 2010		26	26	26	26	26	26	26	26	26	26	26	26	26	26	26	26	26	26	26	26	26	26	26	26	26	26	26	26	26	26	26	26	26	26
	% NH3 volatilisation from slurry	%	Nopolu-volet Agricole report, MEEM 2010		27	27	27	27	27	27	27	27	27	27	27	27	27	27	27	27	27	27	27	27	27	27	27	27	27	27	27	27	27	27	27	27	27	27
	% NH3 volatilisation from excretion on grassland	%	Nopolu-volet Agricole report, MEEM 2010		10	10	10	10	10	10	10	10	10	10	10	10	10	10	10	10	10	10	10	10	10	10	10	10	10	10	10	10	10	10	10	10	10	10
	% N2 and N2O volatilization from litter manure	%	Nopolu-volet Agricole report, MEEM 2010		4	4	4	4	4	4	4	4	4	4	4	4	4	4	4	4	4	4	4	4	4	4	4	4	4	4	4	4	4	4	4	4	4	4
	% N2 and N2O volatilization from other manure	%	Nopolu-volet Agricole report, MEEM 2010		4	4	4	4	4	4	4	4	4	4	4	4	4	4	4	4	4	4	4	4	4	4	4	4	4	4	4	4	4	4	4	4	4	4
	% N2 and N2O volatilization from slurry	%	Nopolu-volet Agricole report, MEEM 2010		3	3	3	3	3	3	3	3	3	3	3	3	3	3	3	3	3	3	3	3	3	3	3	3	3	3	3	3	3	3	3	3	3	3
	% N2 and N2O volatilization from excretion on grassland	%	Nopolu-volet Agricole report, MEEM 2010		2	2	2	2	2	2	2	2	2	2	2	2	2	2	2	2	2	2	2	2	2	2	2	2	2	2	2	2	2	2	2	2	2	2
ovines	% excretion on grassland	%	Nopolu-volet Agricole report, MEEM 2010		61.6438	61.6438	61.6438	58.9041	61.6438	61.6438	61.6438	58.9041	52.0246	54.9057	58.9041	58.9041	50.6849	64.3836	64.3836	63.3497	49.0917	58.9041	58.9041	58.9041	64.3836	58.9041	36.5081	38.2364	47.9452	46.9742	47.9452	41.3244	45.1549	64.3836	64.3836	20.5479	20.5479	53.8865
	% excretion in the barn	%	Nopolu-volet Agricole report, MEEM 2010		38.3562	38.3562	38.3562	41.0959	38.3562	38.3562	38.3562	41.0959	47.9754	45.0943	41.0959	41.0959	49.3151	35.6164	35.6164	36.6503	50.9083	41.0959	41.0959	41.0959	35.6164	41.0959	63.4919	61.7636	52.0548	53.0258	52.0548	58.6756	54.8451	35.6164	35.6164	79.4521	79.4521	46.1135
	% excretion in the barn as litter manure	%	Nopolu-volet Agricole report, MEEM 2010		100	100	100	100	100	100	100	100	100	100	100	100	100	100	100	100	100	100	100	100	100	100	100	100	100	100	100	100	100	100	100	100	100	100
	% excretion in the barn as other manure	%	Nopolu-volet Agricole report, MEEM 2010		0	0	0	0	0	0	0	0	0	0	0	0	0	0	0	0	0	0	0	0	0	0	0	0	0	0	0	0	0	0	0	0	0	0
	% excretion in the barn as slurry	%	Nopolu-volet Agricole report, MEEM 2010		0	0	0	0	0	0	0	0	0	0	0	0	0	0	0	0	0	0	0	0	0	0	0	0	0	0	0	0	0	0	0	0	0	0
	% NH3 volatilisation from litter manure	%	Nopolu-volet Agricole report, MEEM 2010		26	26	26	26	26	26	26	26	26	26	26	26	26	26	26	26	26	26	26	26	26	26	26	26	26	26	26	26	26	26	26	26	26	26
	% NH3 volatilisation from other manure	%	Nopolu-volet Agricole report, MEEM 2010		26	26	26	26	26	26	26	26	26	26	26	26	26	26	26	26	26	26	26	26	26	26	26	26	26	26	26	26	26	26	26	26	26	26
	% NH3 volatilisation from slurry	%	Nopolu-volet Agricole report, MEEM 2010		27	27	27	27	27	27	27	27	27	27	27	27	27	27	27	27	27	27	27	27	27	27	27	27	27	27	27	27	27	27	27	27	27	27
	% NH3 volatilisation from excretion on grassland	%	Nopolu-volet Agricole report, MEEM 2010		10	10	10	10	10	10	10	10	10	10	10	10	10	10	10	10	10	10	10	10	10	10	10	10	10	10	10	10	10	10	10	10	10	10
	% N2 and N2O volatilization from litter manure	%	Nopolu-volet Agricole report, MEEM 2010		4	4	4	4	4	4	4	4	4	4	4	4	4	4	4	4	4	4	4	4	4	4	4	4	4	4	4	4	4	4	4	4	4	4
	% N2 and N2O volatilization from other manure	%	Nopolu-volet Agricole report, MEEM 2010		4	4	4	4	4	4	4	4	4	4	4	4	4	4	4	4	4	4	4	4	4	4	4	4	4	4	4	4	4	4	4	4	4	4
	% N2 and N2O volatilization from slurry	%	Nopolu-volet Agricole report, MEEM 2010		3	3	3	3	3	3	3	3	3	3	3	3	3	3	3	3	3	3	3	3	3	3	3	3	3	3	3	3	3	3	3	3	3	3
	% N2 and N2O volatilization from excretion on grassland	%	Nopolu-volet Agricole report, MEEM 2010		1	1	1	1	1	1	1	1	1	1	1	1	1	1	1	1	1	1	1	1	1	1	1	1	1	1	1	1	1	1	1	1	1	1
caprines	% excretion on grassland	%	Nopolu-volet Agricole report, MEEM 2010		17.8082	17.8082	17.8082	58.9041	61.6438	17.8082	61.6438	58.9041	23.9686	28.4065	58.9041	58.9041	17.8082	3.06668	5.69348	13.3883	26.7532	58.9041	12.3288	12.3288	64.3836	12.3288	20.9452	24.4501	47.9452	36.215	47.9452	32.4484	30.6138	64.3836	64.3836	56.1644	56.1644	36.0956
	% excretion in the barn	%	Nopolu-volet Agricole report, MEEM 2010		82.1918	82.1918	82.1918	41.0959	38.3562	82.1918	38.3562	41.0959	76.0314	71.5935	41.0959	41.0959	82.1918	96.9333	94.3065	86.6117	73.2468	41.0959	87.6712	87.6712	35.6164	87.6712	79.0548	75.5499	52.0548	63.785	52.0548	67.5516	69.3862	35.6164	35.6164	43.8356	43.8356	63.9044
	% excretion in the barn as litter manure	%	Nopolu-volet Agricole report, MEEM 2010		100	100	100	100	100	100	100	100	100	100	100	100	100	100	100	100	100	100	100	100	100	100	100	100	100	100	100	100	100	100	100	100	0	96.9697
	% excretion in the barn as other manure	%	Nopolu-volet Agricole report, MEEM 2010		0	0	0	0	0	0	0	0	0	0	0	0	0	0	0	0	0	0	0	0	0	0	0	0	0	0	0	0	0	0	0	0	0	0
	% excretion in the barn as slurry	%	Nopolu-volet Agricole report, MEEM 2010		0	0	0	0	0	0	0	0	0	0	0	0	0	0	0	0	0	0	0	0	0	0	0	0	0	0	0	0	0	0	0	0	0	0
	% NH3 volatilisation from litter manure	%	Nopolu-volet Agricole report, MEEM 2010		26	26	26	26	26	26	26	26	26	26	26	26	26	26	26	26	26	26	26	26	26	26	26	26	26	26	26	26	26	26	26	26	26	26
	% NH3 volatilisation from other manure	%	Nopolu-volet Agricole report, MEEM 2010		26	26	26	26	26	26	26	26	26	26	26	26	26	26	26	26	26	26	26	26	26	26	26	26	26	26	26	26	26	26	26	26	26	26
	% NH3 volatilisation from slurry	%	Nopolu-volet Agricole report, MEEM 2010		27	27	27	27	27	27	27	27	27	27	27	27	27	27	27	27	27	27	27	27	27	27	27	27	27	27	27	27	27	27	27	27	27	27
	% NH3 volatilisation from excretion on grassland	%	Nopolu-volet Agricole report, MEEM 2010		10	10	10	10	10	10	10	10	10	10	10	10	10	10	10	10	10	10	10	10	10	10	10	10	10	10	10	10	10	10	10	10	10	10
	% N2 and N2O volatilization from litter manure	%	Nopolu-volet Agricole report, MEEM 2010		4	4	4	4	4	4	4	4	4	4	4	4	4	4	4	4	4	4	4	4	4	4	4	4	4	4	4	4	4	4	4	4	4	4
	% N2 and N2O volatilization from other manure	%	Nopolu-volet Agricole report, MEEM 2010		4	4	4	4	4	4	4	4	4	4	4	4	4	4	4	4	4	4	4	4	4	4	4	4	4	4	4	4	4	4	4	4	4	4
	% N2 and N2O volatilization from slurry	%	Nopolu-volet Agricole report, MEEM 2010		3	3	3	3	3	3	3	3	3	3	3	3	3	3	3	3	3	3	3	3	3	3	3	3	3	3	3	3	3	3	3	3	3	3
	% N2 and N2O volatilization from excretion on grassland	%	Nopolu-volet Agricole report, MEEM 2010		1	1	1	1	1	1	1	1	1	1	1	1	1	1	1	1	1	1	1	1	1	1	1	1	1	1	1	1	1	1	1	1	1	1
porcines	% excretion on grassland	%	Interpolation		0	0	0	0	0	0	0	0	0	0	0	0	0	0	0	0	0	0	0	0	0	0	0	0	0	0	0	0	0	0	0	0	0	0
	% excretion in the barn	%	Interpolation		100	100	100	100	100	100	100	100	100	100	100	100	100	100	100	100	100	100	100	100	100	100	100	100	100	100	100	100	100	100	100	100	100	100
	% excretion in the barn as litter manure	%	Interpolation		40	40	40	20	30	40	30	30	80.6102	61.379	30	30	10	28.5788	29.3396	34.0718	25.8214	30	40	40	1e-06	40	30.0918	31.3966	20	20.473	20	24.7091	27.1978	1e-06	1e-06	100	100	34.0506
	% excretion in the barn as other manure	%	Interpolation		0	0	0	0	0	0	0	0	0	0	0	0	0	0	0	0	0	0	0	0	0	0	0	0	0	0	0	0	0	0	0	0	0	0
	% excretion in the barn as slurry	%	Interpolation		60	60	60	80	70	60	70	70	19.3898	38.621	70	70	90	71.4212	70.6604	65.9282	74.1786	70	60	60	100	60	69.9082	68.6034	80	79.527	80	75.2909	72.8022	100	100	0	0	65.9494
	% NH3 volatilisation from litter manure	%	Nopolu-volet Agricole report, MEEM 2010		24	24	24	24	24	24	24	24	24	24	24	24	24	24	24	24	24	24	24	24	24	24	24	24	24	24	24	24	24	24	24	24	24	24
	% NH3 volatilisation from other manure	%	Nopolu-volet Agricole report, MEEM 2010		24	24	24	24	24	24	24	24	24	24	24	24	24	24	24	24	24	24	24	24	24	24	24	24	24	24	24	24	24	24	24	24	24	24
	% NH3 volatilisation from slurry	%	Nopolu-volet Agricole report, MEEM 2010		27	27	27	27	27	27	27	27	27	27	27	27	27	27	27	27	27	27	27	27	27	27	27	27	27	27	27	27	27	27	27	27	27	27
	% NH3 volatilisation from excretion on grassland	%	Nopolu-volet Agricole report, MEEM 2010		10	10	10	10	10	10	10	10	10	10	10	10	10	10	10	10	10	10	10	10	10	10	10	10	10	10	10	10	10	10	10	10	10	10
	% N2 and N2O volatilization from litter manure	%	Nopolu-volet Agricole report, MEEM 2010		3.4	3.4	3.4	3.4	3.4	3.4	3.4	3.4	3.4	3.4	3.4	3.4	3.4	3.4	3.4	3.4	3.4	3.4	3.4	3.4	3.4	3.4	3.4	3.4	3.4	3.4	3.4	3.4	3.4	3.4	3.4	3.4	3.4	3.4
	% N2 and N2O volatilization from other manure	%	Nopolu-volet Agricole report, MEEM 2010		3.4	3.4	3.4	3.4	3.4	3.4	3.4	3.4	3.4	3.4	3.4	3.4	3.4	3.4	3.4	3.4	3.4	3.4	3.4	3.4	3.4	3.4	3.4	3.4	3.4	3.4	3.4	3.4	3.4	3.4	3.4	3.4	3.4	3.4
	% N2 and N2O volatilization from slurry	%	Nopolu-volet Agricole report, MEEM 2010		2	2	2	2	2	2	2	2	2	2	2	2	2	2	2	2	2	2	2	2	2	2	2	2	2	2	2	2	2	2	2	2	2	2
	% N2 and N2O volatilization from excretion on grassland	%	Nopolu-volet Agricole report, MEEM 2010		2	2	2	2	2	2	2	2	2	2	2	2	2	2	2	2	2	2	2	2	2	2	2	2	2	2	2	2	2	2	2	2	2	2
poultry	% excretion on grassland	%	Nopolu-volet Agricole report, MEEM 2010		1e-07	1e-07	1e-07	1e-07	1e-07	1e-07	1e-07	1e-07	1e-07	1e-07	1e-07	1e-07	1e-07	1e-07	1e-07	1e-07	1e-07	1e-07	1e-07	1e-07	1e-07	1e-07	1e-07	1e-07	1e-07	1e-07	1e-07	1e-07	1e-07	1e-07	1e-07	1e-07	1e-07	1e-07
	% excretion in the barn	%	Nopolu-volet Agricole report, MEEM 2010		100	100	100	100	100	100	100	100	100	100	100	100	100	100	100	100	100	100	100	100	100	100	100	100	100	100	100	100	100	100	100	100	100	100
	% excretion in the barn as litter manure	%	Nopolu-volet Agricole report, MEEM 2010		10	10	10	10	10	10	10	10	10	10	10	10	10	10	10	10	10	10	10	10	10	10	10	23.6501	10	10	10	10	10	10	10	10	10	10.4136
	% excretion in the barn as other manure	%	Nopolu-volet Agricole report, MEEM 2010		1e-07	1e-07	1e-07	1e-07	1e-07	1e-07	1e-07	1e-07	1e-07	1e-07	1e-07	1e-07	1e-07	1e-07	1e-07	1e-07	1e-07	1e-07	1e-07	1e-07	1e-07	1e-07	1e-07	1e-07	1e-07	1e-07	1e-07	1e-07	1e-07	1e-07	1e-07	1e-07	1e-07	1e-07
	% excretion in the barn as slurry	%	Nopolu-volet Agricole report, MEEM 2010		90	90	90	90	90	90	90	90	90	90	90	90	90	90	90	90	90	90	90	90	90	90	90	76.3499	90	90	90	90	90	90	90	90	90	89.5864
	% NH3 volatilisation from litter manure	%	Nopolu-volet Agricole report, MEEM 2010		35	35	35	35	35	35	35	35	35	35	35	35	35	35	35	35	35	35	35	35	35	35	35	35	35	35	35	35	35	35	35	35	35	35
	% NH3 volatilisation from other manure	%	Nopolu-volet Agricole report, MEEM 2010		35	35	35	35	35	35	35	35	35	35	35	35	35	35	35	35	35	35	35	35	35	35	35	35	35	35	35	35	35	35	35	35	35	35
	% NH3 volatilisation from slurry	%	Nopolu-volet Agricole report, MEEM 2010		35	35	35	35	35	35	35	35	35	35	35	35	35	35	35	35	35	35	35	35	35	35	35	35	35	35	35	35	35	35	35	35	35	35
	% NH3 volatilisation from excretion on grassland	%	Nopolu-volet Agricole report, MEEM 2010		60	60	60	60	60	60	60	60	60	60	60	60	60	60	60	60	60	60	60	60	60	60	60	60	60	60	60	60	60	60	60	60	60	60
	% N2 and N2O volatilization from litter manure	%	Nopolu-volet Agricole report, MEEM 2010		4	4	4	4	4	4	4	4	4	4	4	4	4	4	4	4	4	4	4	4	4	4	4	4	4	4	4	4	4	4	4	4	4	4
	% N2 and N2O volatilization from other manure	%	Nopolu-volet Agricole report, MEEM 2010		4	4	4	4	4	4	4	4	4	4	4	4	4	4	4	4	4	4	4	4	4	4	4	4	4	4	4	4	4	4	4	4	4	4
	% N2 and N2O volatilization from slurry	%	Nopolu-volet Agricole report, MEEM 2010		3	3	3	3	3	3	3	3	3	3	3	3	3	3	3	3	3	3	3	3	3	3	3	3	3	3	3	3	3	3	3	3	3	3
	% N2 and N2O volatilization from excretion on grassland	%	Nopolu-volet Agricole report, MEEM 2010		2	2	2	2	2	2	2	2	2	2	2	2	2	2	2	2	2	2	2	2	2	2	2	2	2	2	2	2	2	2	2	2	2	2
equine	% excretion on grassland	%	taken as bovine		49.0867	50.3622	50.522	46.636	59.4644	50.2438	58.3566	43.4333	48.4485	52.6611	47.4103	24.1245	56.7512	51.8327	53.2259	53.5392	56.8075	41.7283	47.3676	50.9463	42.3506	52.2108	49.4208	47.6253	46.2813	47.5334	45.8553	47.6041	54.6012	50.3461	41.353	59.8764	58.2625	49.5839
	% excretion in the barn	%	taken as bovine		50.9133	49.6378	49.478	53.364	40.5356	49.7562	41.6434	56.5667	51.5515	47.3389	52.5897	75.8755	43.2488	48.1673	46.7741	46.4608	43.1925	58.2717	52.6324	49.0537	57.6494	47.7892	50.5792	52.3747	53.7187	52.4666	54.1447	52.3959	45.3988	49.6539	58.647	40.1236	41.7375	50.4161
	% excretion in the barn as litter manure	%	taken as bovine		62.5258	72.3828	64.4179	72.2941	62.3372	70.2761	57.2937	70.9069	65.2966	66.3351	37.7701	25.9211	44.4395	44.7892	40.9859	68.035	59.8888	35.6867	33.6941	40.7143	36.8889	43.4905	58.6128	54.1285	54.5673	55.9037	53.9465	55.5515	56.3246	52.1379	35.3534	88.4557	84.3843	55.3253
	% excretion in the barn as other manure	%	taken as bovine		31.1755	13.8086	29.8422	20.4656	30.4466	14.862	34.2196	21.5417	23.7917	22.2185	40.2827	51.113	35.5605	45.3272	47.246	26.8268	24.2075	28.0457	38.5728	35.2684	45.2368	33.8278	34.1267	35.9759	30.4015	32.0897	30.383	32.9062	26.3841	41.5525	45.6518	10.6095	14.6279	31.1696
	% excretion in the barn as slurry	%	taken as bovine		6.29871	13.8086	5.73989	7.24023	7.21617	14.862	8.48669	7.55135	10.9118	11.4464	21.9473	22.9659	20	9.88358	11.7681	5.1382	15.9038	36.2676	27.7331	24.0173	17.8743	22.6817	7.26051	9.8956	15.0312	12.0066	15.6706	11.5423	17.2913	6.30961	18.9948	0.934813	0.987821	13.5051
	% NH3 volatilisation from litter manure	%	taken as bovine		26	26	26	26	26	26	26	26	26	26	26	26	26	26	26	26	26	26	26	26	26	26	26	26	26	26	26	26	26	26	26	26	26	26
	% NH3 volatilisation from other manure	%	taken as bovine		35	35	35	35	35	35	35	35	35	35	35	35	35	35	35	35	35	35	35	35	35	35	35	35	35	35	35	35	35	35	35	35	35	35
	% NH3 volatilisation from slurry	%	taken as bovine		35	35	35	35	35	35	35	35	35	35	35	35	35	35	35	35	35	35	35	35	35	35	35	35	35	35	35	35	35	35	35	35	35	35
	% NH3 volatilisation from excretion on grassland	%	taken as bovine		60	60	60	60	60	60	60	60	60	60	60	60	60	60	60	60	60	60	60	60	60	60	60	60	60	60	60	60	60	60	60	60	60	60
	% N2 and N2O volatilization from litter manure	%	taken as bovine		4	4	4	4	4	4	4	4	4	4	4	4	4	4	4	4	4	4	4	4	4	4	4	4	4	4	4	4	4	4	4	4	4	4
	% N2 and N2O volatilization from other manure	%	taken as bovine		4	4	4	4	4	4	4	4	4	4	4	4	4	4	4	4	4	4	4	4	4	4	4	4	4	4	4	4	4	4	4	4	4	4
	% N2 and N2O volatilization from slurry	%	taken as bovine		3	3	3	3	3	3	3	3	3	3	3	3	3	3	3	3	3	3	3	3	3	3	3	3	3	3	3	3	3	3	3	3	3	3
	% N2 and N2O volatilization from excretion on grassland	%	taken as bovine		2	2	2	2	2	2	2	2	2	2	2	2	2	2	2	2	2	2	2	2	2	2	2	2	2	2	2	2	2	2	2	2	2	2
	N-volatilisation indoors bovines	ktN/yr			0	0	0	0	14.2539	8.85431	8.1185	0	0	0	32.2444	0	16.385	20.5199	35.9964	0	53.2379	11.8528	5.11849	6.51604	3.28514	7.5777	12.6951	33.7583	0	10.9751	0	9.76467	11.2768	0	0	0	0	302.43
	N-volatilisation outdoors bovines	ktN/yr			0	0	0	0	7.87146	3.35853	4.2812	0	0	0	10.8972	0	8.06443	8.30617	15.3999	0	26.2935	3.16902	1.72404	2.53546	0.905745	3.10288	4.66951	11.5469	0	3.73797	0	3.33559	5.091	0	0	0	0	124.291
	N-excretion after volatilization indoors bovines	ktN/yr			0	0	0	0	38.352	23.7529	21.8332	0	0	0	86.2621	0	43.8672	55.1544	96.6816	0	142.76	31.5334	13.6625	17.418	8.80251	20.2665	34.1574	90.7366	0	29.475	0	26.229	30.2229	0	0	0	0	811.167
	N-excretion after volatilization outdoors bovines	ktN/yr			0	0	0	0	69.2997	29.5682	37.6913	0	0	0	95.9382	0	70.9986	73.1268	135.579	0	231.486	27.8998	15.1783	22.322	7.97411	27.3175	41.11	101.658	0	32.9088	0	29.3663	44.8208	0	0	0	0	1094.24
	N-volatilization indoors ovines	ktN/yr			0	0	0	0	0.0110213	0.00586449	0.00388444	0	0	0	0.0298827	0	0.0549734	0.537987	0.741689	0	0.397347	0.0147464	0.0652224	0.111734	0.14096	0.48936	0.362253	0.643164	0	0.0588385	0	0.313393	0.031226	0	0	0	0	4.01355
	N-volatilization outdoors ovines	ktN/yr			0	0	0	0	0.00661608	0.00352046	0.00233183	0	0	0	0.0159986	0	0.0211041	0.363254	0.500796	0	0.143121	0.00789493	0.0349187	0.0598204	0.0951775	0.261993	0.0778034	0.148724	0	0.0194692	0	0.0824429	0.00960283	0	0	0	0	1.85459
	N-excretion after volatilization indoors ovines	ktN/yr			0	0	0	0	0.0297379	0.0158237	0.0104811	0	0	0	0.0806302	0	0.14833	1.45161	2.00124	0	1.07213	0.0397891	0.175985	0.301485	0.380341	1.3204	0.977441	1.7354	0	0.15876	0	0.845605	0.0842548	0	0	0	0	10.8295
	N-excretion after volatilization outdoors ovines	ktN/yr			0	0	0	0	0.0588897	0.0313356	0.0207556	0	0	0	0.142403	0	0.187847	3.23332	4.45758	0	1.27392	0.0702727	0.310811	0.532461	0.847174	2.332	0.692527	1.32379	0	0.173295	0	0.733823	0.0854747	0	0	0	0	16.5077
	N-volatilization indoors caprines	ktN/yr			0	0	0	0	0.187479	0.309629	0.105584	0	0	0	1.28236	0	0.252196	1.39374	2.54009	0	7.19785	0.114267	0.501184	0.385623	4.35942	2.82349	7.61201	9.16217	0	4.81155	0	2.6999	0.498371	0	0	0	0	46.2369
	N-volatilization outdoors caprines	ktN/yr			0	0	0	0	0.112544	0.0250581	0.063382	0	0	0	0.686548	0	0.0204101	0.0164699	0.0572795	0	0.981986	0.0611761	0.0263254	0.0202554	2.94352	0.148307	0.753304	1.10754	0	1.0204	0	0.484416	0.0821318	0	0	0	0	8.61106
	N-excretion after volatilization indoors caprines	ktN/yr			0	0	0	0	0.50586	0.835449	0.284888	0	0	0	3.46009	0	0.680481	3.76062	6.85373	0	19.4214	0.308317	1.35231	1.0405	11.7627	7.6184	20.5389	24.7216	0	12.9827	0	7.28493	1.34472	0	0	0	0	124.758
	N-excretion after volatilization outdoors caprines	ktN/yr			0	0	0	0	1.00175	0.223042	0.564162	0	0	0	6.11095	0	0.18167	0.146599	0.509845	0	8.74065	0.544528	0.234322	0.180293	26.2003	1.32008	6.70515	9.85822	0	9.08255	0	4.31178	0.731054	0	0	0	0	76.6469
	N-volatilization indoors porcines	ktN/yr			0	0	0	0	0.963479	0.480496	1.3328	0	0	0	0.98649	0	25.2396	2.68869	7.0194	0	2.41335	0.531918	0.169938	1.04262	0.234004	0.750992	1.19225	2.57629	0	1.74902	0	1.02065	0.482106	0	0	0	0	50.8741
	N-volatilization outdoors porcines	ktN/yr			0	0	0	0	0	0	0	0	0	0	0	0	0	0	0	0	0	0	0	0	0	0	0	0	0	0	0	0	0	0	0	0	0	0
	N-excretion after volatilization indoors porcines	ktN/yr			0	0	0	0	2.64198	1.3361	3.6547	0	0	0	2.70508	0	67.3229	7.35817	19.2304	0	6.57941	1.45858	0.472541	2.89917	0.615684	2.08825	3.26972	7.07825	0	4.73307	0	2.77825	1.31686	0	0	0	0	137.539
	N-excretion after volatilization outdoors porcines	ktN/yr			0	0	0	0	0	0	0	0	0	0	0	0	0	0	0	0	0	0	0	0	0	0	0	0	0	0	0	0	0	0	0	0	0	0
	N-volatilization indoors poultry	ktN/yr			0	0	0	0	1.63313	0.722868	0.613766	0	0	0	0.967069	0	22.7844	10.2244	17.7858	0	4.19391	0.266702	1.5579	1.92806	0.871138	4.41007	1.25769	7.24916	0	1.36165	0	2.79458	2.76517	0	0	0	0	83.3875
	N-volatilization outdoors poultry	ktN/yr			0	0	0	0	2.76979e-09	1.22598e-09	1.04095e-09	0	0	0	1.64014e-09	0	3.86423e-08	1.73405e-08	3.01647e-08	0	7.11284e-09	4.52326e-10	2.64219e-09	3.26998e-09	1.47745e-09	7.47946e-09	2.13304e-09	1.22783e-08	0	2.30935e-09	0	4.7396e-09	4.68972e-09	0	0	0	0	1.41409e-07
	N-excretion after volatilization indoors poultry	ktN/yr			0	0	0	0	2.89266	1.28037	1.08712	0	0	0	1.71291	0	40.3566	18.1097	31.5029	0	7.42839	0.472392	2.7594	3.41505	1.54299	7.81127	2.22767	12.8134	0	2.4118	0	4.94986	4.89777	0	0	0	0	147.672
	N-excretion after volatilization outdoors poultry	ktN/yr			0	0	0	0	1.75601e-09	7.77256e-10	6.59946e-10	0	0	0	1.03983e-09	0	2.44987e-08	1.09936e-08	1.9124e-08	0	4.50945e-09	2.86769e-10	1.67511e-09	2.07313e-09	9.36682e-10	4.74188e-09	1.35232e-09	7.78427e-09	0	1.4641e-09	0	3.00484e-09	2.97322e-09	0	0	0	0	8.96512e-08
	N-volatilization indoors equine	ktN/yr			0	0	0	0	1.32869	0.340248	0.318414	0	0	0	1.88856	0	0.64936	1.51003	1.29551	0	1.99935	0.78449	0.103056	1.27283	0.195878	1.93123	0.410127	4.22171	0	0.331396	0	0.659861	0.268829	0	0	0	0	19.5096
	N-volatilization outdoors equine	ktN/yr			0	0	0	0	0.332153	0.0601191	0.0749011	0	0	0	0.270652	0	0.138031	0.262915	0.23601	0	0.445645	0.0890458	0.0145917	0.212024	0.0227975	0.341044	0.0675183	0.638497	0	0.050227	0	0.100177	0.0542224	0	0	0	0	3.41057
	N-excretion after volatilization indoors equine	ktN/yr			0	0	0	0	3.02556	0.804669	0.709462	0	0	0	3.88489	0	1.37354	3.18848	2.69297	0	4.51678	1.60682	0.208744	2.6531	0.400909	4.07188	0.918735	9.28159	0	0.734755	0	1.46054	0.598166	0	0	0	0	42.1316
	N-excretion after volatilization outdoors equine	ktN/yr			0	0	0	0	6.0554	1.09602	1.36551	0	0	0	4.9342	0	2.51642	4.79315	4.30264	0	8.12446	1.62337	0.266019	3.86537	0.415615	6.2175	1.23091	11.6403	0	0.915678	0	1.82631	0.988516	0	0	0	0	62.1774
	Total N-volatilization indoors	ktN/yr			0	0	0	0	18.3777	10.7134	10.493	0	0	0	37.3988	0	65.3655	36.8747	65.3789	0	69.4397	13.5649	7.51579	11.2569	9.08653	17.9828	23.5295	57.6108	0	19.2876	0	17.253	15.3225	0	0	0	0	506.452
	Total N-volatilization outdoors	ktN/yr			0	0	0	0	8.32278	3.44723	4.42181	0	0	0	11.8704	0	8.24398	8.94881	16.194	0	27.8643	3.32714	1.79988	2.82756	3.96724	3.85423	5.56814	13.4417	0	4.82806	0	4.00263	5.23696	0	0	0	0	138.167
	Total N-excretion after volatilization indoors	ktN/yr			0	0	0	0	47.4478	28.0253	27.5798	0	0	0	98.1057	0	153.749	89.023	158.963	0	181.778	35.4193	18.6315	27.7273	23.5051	43.1767	62.0899	146.367	0	50.4961	0	43.5482	38.4646	0	0	0	0	1274.1
	Total N-excretion after volatilization outdoors	ktN/yr			0	0	0	0	76.4158	30.9186	39.6418	0	0	0	107.126	0	73.8846	81.2999	144.849	0	249.625	30.138	15.9895	26.9001	35.4372	37.1871	49.7386	124.481	0	43.0803	0	36.2382	46.6258	0	0	0	0	1249.58
	N volatilization from permanent grassland	ktN/yr			0	0	0	0	6.30504	2.66203	2.54149	0	0	0	10.0099	0	2.28704	4.02369	6.92356	0	20.5589	2.95733	1.74557	2.33163	3.07888	3.08704	3.55582	7.54709	0	3.60572	0	2.47542	4.09059	0	0	0	0	89.7867
	N volatilization from cropland	ktN/yr			0	0	0	0	20.3954	11.4986	12.3733	0	0	0	39.2593	0	71.3224	41.7998	74.6493	0	76.7451	13.9347	7.5701	11.7528	9.97489	18.75	25.5418	63.5054	0	20.5099	0	18.7803	16.4688	0	0	0	0	554.832
	N from excretion reaching permanent grassland roots	ktN/yr			0	0	0	0	57.8899	23.8761	22.7846	0	0	0	90.3355	0	20.497	36.5552	61.9289	0	184.179	26.7882	15.507	22.182	27.502	29.785	31.7632	69.892	0	32.1735	0	22.4115	36.4194	0	0	0	0	812.47
	N from excretion reaching arable land roots	ktN/yr			0	0	0	0	65.9737	35.0679	44.437	0	0	0	114.896	0	207.137	133.768	241.883	0	247.225	38.7691	19.1139	32.4454	31.4403	50.5788	80.0654	200.955	0	61.4029	0	57.3749	48.671	0	0	0	0	1711.2
CARBON
Production
	%C de chaque organe
edible fraction	%C in boneless bovine meat	%	from USDA		13.7	13.7	13.7	13.7	13.7	13.7	13.7	13.7	13.7	13.7	13.7	13.7	13.7	13.7	13.7	13.7	13.7	13.7	13.7	13.7	13.7	13.7	13.7	13.7	13.7	13.7	13.7	13.7	13.7	13.7	13.7	13.7	13.7	13.7
	%C in bovine bones	%	Mello et al. 1978		49.4	49.4	49.4	49.4	49.4	49.4	49.4	49.4	49.4	49.4	49.4	49.4	49.4	49.4	49.4	49.4	49.4	49.4	49.4	49.4	49.4	49.4	49.4	49.4	49.4	49.4	49.4	49.4	49.4	49.4	49.4	49.4	49.4	49.4
	%C in edible bovine grease	%	from USDA		66.7	66.7	66.7	66.7	66.7	66.7	66.7	66.7	66.7	66.7	66.7	66.7	66.7	66.7	66.7	66.7	66.7	66.7	66.7	66.7	66.7	66.7	66.7	66.7	66.7	66.7	66.7	66.7	66.7	66.7	66.7	66.7	66.7	66.7
non edible fraction	%C in bovine skin	%	from USDA		35.4	35.4	35.4	35.4	35.4	35.4	35.4	35.4	35.4	35.4	35.4	35.4	35.4	35.4	35.4	35.4	35.4	35.4	35.4	35.4	35.4	35.4	35.4	35.4	35.4	35.4	35.4	35.4	35.4	35.4	35.4	35.4	35.4	35.4
	%C bovine blood	%	from USDA		27	27	27	27	27	27	27	27	27	27	27	27	27	27	27	27	27	27	27	27	27	27	27	27	27	27	27	27	27	27	27	27	27	27
	%C bovine casing	%	from USDA		7.8	7.8	7.8	7.8	7.8	7.8	7.8	7.8	7.8	7.8	7.8	7.8	7.8	7.8	7.8	7.8	7.8	7.8	7.8	7.8	7.8	7.8	7.8	7.8	7.8	7.8	7.8	7.8	7.8	7.8	7.8	7.8	7.8	7.8
	%C bovine head and feet	%	from USDA		31	31	31	31	31	31	31	31	31	31	31	31	31	31	31	31	31	31	31	31	31	31	31	31	31	31	31	31	31	31	31	31	31	31
	%C bovine offals	%	from USDA		14.4	14.4	14.4	14.4	14.4	14.4	14.4	14.4	14.4	14.4	14.4	14.4	14.4	14.4	14.4	14.4	14.4	14.4	14.4	14.4	14.4	14.4	14.4	14.4	14.4	14.4	14.4	14.4	14.4	14.4	14.4	14.4	14.4	14.4
	%C bovine unedible grease	%	from USDA		66.7	66.7	66.7	66.7	66.7	66.7	66.7	66.7	66.7	66.7	66.7	66.7	66.7	66.7	66.7	66.7	66.7	66.7	66.7	66.7	66.7	66.7	66.7	66.7	66.7	66.7	66.7	66.7	66.7	66.7	66.7	66.7	66.7	66.7
	%C edible in bovine carcass weight				13.7481	13.7481	13.7481	13.7481	13.7481	13.7481	13.7481	13.7481	13.7481	13.7481	13.7481	13.7481	13.7481	13.7481	13.7481	13.7481	13.7481	13.7481	13.7481	13.7481	13.7481	13.7481	13.7481	13.7481	13.7481	13.7481	13.7481	13.7481	13.7481	13.7481	13.7481	13.7481	13.7481	13.7481
	%C non edible in bovine carcass weight				33.2385	33.2385	33.2385	33.2385	33.2385	33.2385	33.2385	33.2385	33.2385	33.2385	33.2385	33.2385	33.2385	33.2385	33.2385	33.2385	33.2385	33.2385	33.2385	33.2385	33.2385	33.2385	33.2385	33.2385	33.2385	33.2385	33.2385	33.2385	33.2385	33.2385	33.2385	33.2385	33.2385	33.2385
edible fraction	%C in boneless ovine meat	%	from USDA		13.7	13.7	13.7	13.7	13.7	13.7	13.7	13.7	13.7	13.7	13.7	13.7	13.7	13.7	13.7	13.7	13.7	13.7	13.7	13.7	13.7	13.7	13.7	13.7	13.7	13.7	13.7	13.7	13.7	13.7	13.7	13.7	13.7	13.7
	%C in ovine bones	%	Mello et al. 1978		49.4	49.4	49.4	49.4	49.4	49.4	49.4	49.4	49.4	49.4	49.4	49.4	49.4	49.4	49.4	49.4	49.4	49.4	49.4	49.4	49.4	49.4	49.4	49.4	49.4	49.4	49.4	49.4	49.4	49.4	49.4	49.4	49.4	49.4
	%C in edible ovine grease	%	from USDA		37.8	37.8	37.8	37.8	37.8	37.8	37.8	37.8	37.8	37.8	37.8	37.8	37.8	37.8	37.8	37.8	37.8	37.8	37.8	37.8	37.8	37.8	37.8	37.8	37.8	37.8	37.8	37.8	37.8	37.8	37.8	37.8	37.8	37.8
non edible fraction	%C in ovine skin	%	from USDA		35.4	35.4	35.4	35.4	35.4	35.4	35.4	35.4	35.4	35.4	35.4	35.4	35.4	35.4	35.4	35.4	35.4	35.4	35.4	35.4	35.4	35.4	35.4	35.4	35.4	35.4	35.4	35.4	35.4	35.4	35.4	35.4	35.4	35.4
	%C ovine blood	%	from USDA		27	27	27	27	27	27	27	27	27	27	27	27	27	27	27	27	27	27	27	27	27	27	27	27	27	27	27	27	27	27	27	27	27	27
	%C ovine casing	%	from USDA		7.8	7.8	7.8	7.8	7.8	7.8	7.8	7.8	7.8	7.8	7.8	7.8	7.8	7.8	7.8	7.8	7.8	7.8	7.8	7.8	7.8	7.8	7.8	7.8	7.8	7.8	7.8	7.8	7.8	7.8	7.8	7.8	7.8	7.8
	%C ovine head and feet	%	from USDA		29.3	29.3	29.3	29.3	29.3	29.3	29.3	29.3	29.3	29.3	29.3	29.3	29.3	29.3	29.3	29.3	29.3	29.3	29.3	29.3	29.3	29.3	29.3	29.3	29.3	29.3	29.3	29.3	29.3	29.3	29.3	29.3	29.3	29.3
	%C ovine offals	%	from USDA		12.4	12.4	12.4	12.4	12.4	12.4	12.4	12.4	12.4	12.4	12.4	12.4	12.4	12.4	12.4	12.4	12.4	12.4	12.4	12.4	12.4	12.4	12.4	12.4	12.4	12.4	12.4	12.4	12.4	12.4	12.4	12.4	12.4	12.4
	%C ovine unedible grease	%	from USDA		37.8	37.8	37.8	37.8	37.8	37.8	37.8	37.8	37.8	37.8	37.8	37.8	37.8	37.8	37.8	37.8	37.8	37.8	37.8	37.8	37.8	37.8	37.8	37.8	37.8	37.8	37.8	37.8	37.8	37.8	37.8	37.8	37.8	37.8
	%C edible in ovine carcass weight				12.45	12.45	12.45	12.45	12.45	12.45	12.45	12.45	12.45	12.45	12.45	12.45	12.45	12.45	12.45	12.45	12.45	12.45	12.45	12.45	12.45	12.45	12.45	12.45	12.45	12.45	12.45	12.45	12.45	12.45	12.45	12.45	12.45	12.45
	%C non edible in ovine carcass weight				26.3731	26.3731	26.3731	26.3731	26.3731	26.3731	26.3731	26.3731	26.3731	26.3731	26.3731	26.3731	26.3731	26.3731	26.3731	26.3731	26.3731	26.3731	26.3731	26.3731	26.3731	26.3731	26.3731	26.3731	26.3731	26.3731	26.3731	26.3731	26.3731	26.3731	26.3731	26.3731	26.3731	26.3731
edible fraction	%C in boneless porcine meat	%	from USDA		13	13	13	13	13	13	13	13	13	13	13	13	13	13	13	13	13	13	13	13	13	13	13	13	13	13	13	13	13	13	13	13	13	13
	%C in porcine bones	%	Mello et al. 1978		49.4	49.4	49.4	49.4	49.4	49.4	49.4	49.4	49.4	49.4	49.4	49.4	49.4	49.4	49.4	49.4	49.4	49.4	49.4	49.4	49.4	49.4	49.4	49.4	49.4	49.4	49.4	49.4	49.4	49.4	49.4	49.4	49.4	49.4
	%C in edible porcine grease	%	from USDA		58.2	58.2	58.2	58.2	58.2	58.2	58.2	58.2	58.2	58.2	58.2	58.2	58.2	58.2	58.2	58.2	58.2	58.2	58.2	58.2	58.2	58.2	58.2	58.2	58.2	58.2	58.2	58.2	58.2	58.2	58.2	58.2	58.2	58.2
non edible fraction	%C in porcine skin	%	from USDA		35.4	35.4	35.4	35.4	35.4	35.4	35.4	35.4	35.4	35.4	35.4	35.4	35.4	35.4	35.4	35.4	35.4	35.4	35.4	35.4	35.4	35.4	35.4	35.4	35.4	35.4	35.4	35.4	35.4	35.4	35.4	35.4	35.4	35.4
	%C porcine blood	%	from USDA		27	27	27	27	27	27	27	27	27	27	27	27	27	27	27	27	27	27	27	27	27	27	27	27	27	27	27	27	27	27	27	27	27	27
	%C porcine casing	%	from USDA		7.8	7.8	7.8	7.8	7.8	7.8	7.8	7.8	7.8	7.8	7.8	7.8	7.8	7.8	7.8	7.8	7.8	7.8	7.8	7.8	7.8	7.8	7.8	7.8	7.8	7.8	7.8	7.8	7.8	7.8	7.8	7.8	7.8	7.8
	%C porcine head and feet	%	from USDA		33.2	33.2	33.2	33.2	33.2	33.2	33.2	33.2	33.2	33.2	33.2	33.2	33.2	33.2	33.2	33.2	33.2	33.2	33.2	33.2	33.2	33.2	33.2	33.2	33.2	33.2	33.2	33.2	33.2	33.2	33.2	33.2	33.2	33.2
	%C porcine offals	%	from USDA		11.9	11.9	11.9	11.9	11.9	11.9	11.9	11.9	11.9	11.9	11.9	11.9	11.9	11.9	11.9	11.9	11.9	11.9	11.9	11.9	11.9	11.9	11.9	11.9	11.9	11.9	11.9	11.9	11.9	11.9	11.9	11.9	11.9	11.9
	%C porcine unedible grease	%	from USDA		58.2	58.2	58.2	58.2	58.2	58.2	58.2	58.2	58.2	58.2	58.2	58.2	58.2	58.2	58.2	58.2	58.2	58.2	58.2	58.2	58.2	58.2	58.2	58.2	58.2	58.2	58.2	58.2	58.2	58.2	58.2	58.2	58.2	58.2
	%C edible in porcine carcass weight				12.5054	12.5054	12.5054	12.5054	12.5054	12.5054	12.5054	12.5054	12.5054	12.5054	12.5054	12.5054	12.5054	12.5054	12.5054	12.5054	12.5054	12.5054	12.5054	12.5054	12.5054	12.5054	12.5054	12.5054	12.5054	12.5054	12.5054	12.5054	12.5054	12.5054	12.5054	12.5054	12.5054	12.5054
	%C non edible in porcine carcass weight				19.8199	19.8199	19.8199	19.8199	19.8199	19.8199	19.8199	19.8199	19.8199	19.8199	19.8199	19.8199	19.8199	19.8199	19.8199	19.8199	19.8199	19.8199	19.8199	19.8199	19.8199	19.8199	19.8199	19.8199	19.8199	19.8199	19.8199	19.8199	19.8199	19.8199	19.8199	19.8199	19.8199	19.8199
edible fraction	%C in boneless poultry meat	%	from USDA		12.1	12.1	12.1	12.1	12.1	12.1	12.1	12.1	12.1	12.1	12.1	12.1	12.1	12.1	12.1	12.1	12.1	12.1	12.1	12.1	12.1	12.1	12.1	12.1	12.1	12.1	12.1	12.1	12.1	12.1	12.1	12.1	12.1	12.1
	%C in poultry bones	%	Mello et al. 1978		49.4	49.4	49.4	49.4	49.4	49.4	49.4	49.4	49.4	49.4	49.4	49.4	49.4	49.4	49.4	49.4	49.4	49.4	49.4	49.4	49.4	49.4	49.4	49.4	49.4	49.4	49.4	49.4	49.4	49.4	49.4	49.4	49.4	49.4
	%C in poultry grease	%	from USDA		72.9	72.9	72.9	72.9	72.9	72.9	72.9	72.9	72.9	72.9	72.9	72.9	72.9	72.9	72.9	72.9	72.9	72.9	72.9	72.9	72.9	72.9	72.9	72.9	72.9	72.9	72.9	72.9	72.9	72.9	72.9	72.9	72.9	72.9
non edible fraction	%C in poultry skin	%	from USDA		36.1	36.1	36.1	36.1	36.1	36.1	36.1	36.1	36.1	36.1	36.1	36.1	36.1	36.1	36.1	36.1	36.1	36.1	36.1	36.1	36.1	36.1	36.1	36.1	36.1	36.1	36.1	36.1	36.1	36.1	36.1	36.1	36.1	36.1
	%C poultry blood	%	from USDA		27	27	27	27	27	27	27	27	27	27	27	27	27	27	27	27	27	27	27	27	27	27	27	27	27	27	27	27	27	27	27	27	27	27
	%C poultry casing	%	from USDA		7.8	7.8	7.8	7.8	7.8	7.8	7.8	7.8	7.8	7.8	7.8	7.8	7.8	7.8	7.8	7.8	7.8	7.8	7.8	7.8	7.8	7.8	7.8	7.8	7.8	7.8	7.8	7.8	7.8	7.8	7.8	7.8	7.8	7.8
	%C poultry head and feet	%	from USDA		31.2	31.2	31.2	31.2	31.2	31.2	31.2	31.2	31.2	31.2	31.2	31.2	31.2	31.2	31.2	31.2	31.2	31.2	31.2	31.2	31.2	31.2	31.2	31.2	31.2	31.2	31.2	31.2	31.2	31.2	31.2	31.2	31.2	31.2
	%C poultry offals	%	from USDA		11.5	11.5	11.5	11.5	11.5	11.5	11.5	11.5	11.5	11.5	11.5	11.5	11.5	11.5	11.5	11.5	11.5	11.5	11.5	11.5	11.5	11.5	11.5	11.5	11.5	11.5	11.5	11.5	11.5	11.5	11.5	11.5	11.5	11.5
	%C poultry unedible grease	%	from USDA		31	31	31	31	31	31	31	31	31	31	31	31	31	31	31	31	31	31	31	31	31	31	31	31	31	31	31	31	31	31	31	31	31	31
	%C eggs	%			13	13	13	13	13	13	13	13	13	13	13	13	13	13	13	13	13	13	13	13	13	13	13	13	13	13	13	13	13	13	13	13	13	13
	%C cow milk	%			5.48	5.48	5.48	5.48	5.48	5.48	5.48	5.48	5.48	5.48	5.48	5.48	5.48	5.48	5.48	5.48	5.48	5.48	5.48	5.48	5.48	5.48	5.48	5.48	5.48	5.48	5.48	5.48	5.48	5.48	5.48	5.48	5.48	5.48
	%C sheep and goat milk	%			8.7	8.7	8.7	8.7	8.7	8.7	8.7	8.7	8.7	8.7	8.7	8.7	8.7	8.7	8.7	8.7	8.7	8.7	8.7	8.7	8.7	8.7	8.7	8.7	8.7	8.7	8.7	8.7	8.7	8.7	8.7	8.7	8.7	8.7
	%C edible in poultry carcass weight	%			9.89179	9.89179	9.89179	9.89179	9.89179	9.89179	9.89179	9.89179	9.89179	9.89179	9.89179	9.89179	9.89179	9.89179	9.89179	9.89179	9.89179	9.89179	9.89179	9.89179	9.89179	9.89179	9.89179	9.89179	9.89179	9.89179	9.89179	9.89179	9.89179	9.89179	9.89179	9.89179	9.89179	9.89179
	%C non edible in poultry carcass weight	%			25.9518	25.9518	25.9518	25.9518	25.9518	25.9518	25.9518	25.9518	25.9518	25.9518	25.9518	25.9518	25.9518	25.9518	25.9518	25.9518	25.9518	25.9518	25.9518	25.9518	25.9518	25.9518	25.9518	25.9518	25.9518	25.9518	25.9518	25.9518	25.9518	25.9518	25.9518	25.9518	25.9518	25.9518
edible fraction	%C in boneless equine meat	%	taken as bovine		13.7	13.7	13.7	13.7	13.7	13.7	13.7	13.7	13.7	13.7	13.7	13.7	13.7	13.7	13.7	13.7	13.7	13.7	13.7	13.7	13.7	13.7	13.7	13.7	13.7	13.7	13.7	13.7	13.7	13.7	13.7	13.7	13.7	13.7
	%C in equine bones	%	taken as bovine		49.4	49.4	49.4	49.4	49.4	49.4	49.4	49.4	49.4	49.4	49.4	49.4	49.4	49.4	49.4	49.4	49.4	49.4	49.4	49.4	49.4	49.4	49.4	49.4	49.4	49.4	49.4	49.4	49.4	49.4	49.4	49.4	49.4	49.4
	%C in edible equine grease	%	taken as bovine		66.7	66.7	66.7	66.7	66.7	66.7	66.7	66.7	66.7	66.7	66.7	66.7	66.7	66.7	66.7	66.7	66.7	66.7	66.7	66.7	66.7	66.7	66.7	66.7	66.7	66.7	66.7	66.7	66.7	66.7	66.7	66.7	66.7	66.7
non edible fraction	%C in equine skin	%	taken as bovine		35.4	35.4	35.4	35.4	35.4	35.4	35.4	35.4	35.4	35.4	35.4	35.4	35.4	35.4	35.4	35.4	35.4	35.4	35.4	35.4	35.4	35.4	35.4	35.4	35.4	35.4	35.4	35.4	35.4	35.4	35.4	35.4	35.4	35.4
	%C equine blood	%	taken as bovine		27	27	27	27	27	27	27	27	27	27	27	27	27	27	27	27	27	27	27	27	27	27	27	27	27	27	27	27	27	27	27	27	27	27
	%C equine casing	%	taken as bovine		7.8	7.8	7.8	7.8	7.8	7.8	7.8	7.8	7.8	7.8	7.8	7.8	7.8	7.8	7.8	7.8	7.8	7.8	7.8	7.8	7.8	7.8	7.8	7.8	7.8	7.8	7.8	7.8	7.8	7.8	7.8	7.8	7.8	7.8
	%C equine head and feet	%	taken as bovine		31	31	31	31	31	31	31	31	31	31	31	31	31	31	31	31	31	31	31	31	31	31	31	31	31	31	31	31	31	31	31	31	31	31
	%C equine offals	%	taken as bovine		14.4	14.4	14.4	14.4	14.4	14.4	14.4	14.4	14.4	14.4	14.4	14.4	14.4	14.4	14.4	14.4	14.4	14.4	14.4	14.4	14.4	14.4	14.4	14.4	14.4	14.4	14.4	14.4	14.4	14.4	14.4	14.4	14.4	14.4
	%C equine unedible grease	%	taken as bovine		66.7	66.7	66.7	66.7	66.7	66.7	66.7	66.7	66.7	66.7	66.7	66.7	66.7	66.7	66.7	66.7	66.7	66.7	66.7	66.7	66.7	66.7	66.7	66.7	66.7	66.7	66.7	66.7	66.7	66.7	66.7	66.7	66.7	66.7
	%C edible in equine carcass weight				13.7481	13.7481	13.7481	13.7481	13.7481	13.7481	13.7481	13.7481	13.7481	13.7481	13.7481	13.7481	13.7481	13.7481	13.7481	13.7481	13.7481	13.7481	13.7481	13.7481	13.7481	13.7481	13.7481	13.7481	13.7481	13.7481	13.7481	13.7481	13.7481	13.7481	13.7481	13.7481	13.7481	13.7481
	%C non edible in equine carcass weight				33.2385	33.2385	33.2385	33.2385	33.2385	33.2385	33.2385	33.2385	33.2385	33.2385	33.2385	33.2385	33.2385	33.2385	33.2385	33.2385	33.2385	33.2385	33.2385	33.2385	33.2385	33.2385	33.2385	33.2385	33.2385	33.2385	33.2385	33.2385	33.2385	33.2385	33.2385	33.2385	33.2385	33.2385
	edible animal C production	ktonC/yr			0	0	0	0	34.8187	18.265	17.6656	0	0	0	53.5412	0	116.902	76.0941	127.88	0	86.3856	10.7146	8.25903	14.3511	12.5099	23.8405	22.196	78.4881	0	20.8412	0	28.8816	10.5181	0	0	0	0	762.152
	Dairy products	ktonC/yr			0	0	0	0	160.624	75.8758	109.774	0	0	0	260.7	0	387.048	144.478	352.789	0	190.436	125.509	61.0094	72.5816	20.6687	70.4511	55.6239	172.199	0	50.7496	0	47.4893	45.6654	0	0	0	0	2403.67
	non edible animal C production	ktonC/yr			0	0	0	0	84.8874	44.5906	42.1164	0	0	0	130.221	0	273.923	188.559	314.963	0	211.357	25.8766	20.5374	34.6751	30.2587	58.511	53.5918	193.773	0	49.6891	0	71.247	25.4286	0	0	0	0	1854.21
	total edible animal C production (dairy products + meat)	ktonC/yr			0	0	0	0	195.442	94.1408	127.439	0	0	0	314.241	0	503.95	220.572	480.67	0	276.822	136.224	69.2685	86.9327	33.1786	94.2916	77.8199	250.687	0	71.5908	0	76.3709	56.1835	0	0	0	0	3165.82
	total animal C production	ktonC/yr			0	0	0	0	280.33	138.731	169.556	0	0	0	444.462	0	777.873	409.131	795.633	0	488.179	162.1	89.8058	121.608	63.4372	152.803	131.412	444.461	0	121.28	0	147.618	81.6121	0	0	0	0	5020.03
	C/N Excrétion
	Bovines	gC/gN	MEEM 2010 corrected by Soltner 2005		10.3	10.3	10.3	10.3	10.3	10.3	10.3	10.3	10.3	10.3	10.3	10.3	10.3	10.3	10.3	10.3	10.3	10.3	10.3	10.3	10.3	10.3	10.3	10.3	10.3	10.3	10.3	10.3	10.3	10.3	10.3	10.3	10.3	10.3
	ovines	gC/gN	MEEM 2010 corrected by Soltner 2006		6.7	6.7	6.7	6.7	6.7	6.7	6.7	6.7	6.7	6.7	6.7	6.7	6.7	6.7	6.7	6.7	6.7	6.7	6.7	6.7	6.7	6.7	6.7	6.7	6.7	6.7	6.7	6.7	6.7	6.7	6.7	6.7	6.7	6.7
	caprines	gC/gN	MEEM 2010 corrected by Soltner 2007		6.7	6.7	6.7	6.7	6.7	6.7	6.7	6.7	6.7	6.7	6.7	6.7	6.7	6.7	6.7	6.7	6.7	6.7	6.7	6.7	6.7	6.7	6.7	6.7	6.7	6.7	6.7	6.7	6.7	6.7	6.7	6.7	6.7	6.7
	Porcines	gC/gN	MEEM 2010 corrected by Soltner 2008		4.5	4.5	4.5	4.5	4.5	4.5	4.5	4.5	4.5	4.5	4.5	4.5	4.5	4.5	4.5	4.5	4.5	4.5	4.5	4.5	4.5	4.5	4.5	4.5	4.5	4.5	4.5	4.5	4.5	4.5	4.5	4.5	4.5	4.5
	poultry	gC/gN	MEEM 2010 corrected by Soltner 2009		5.8	5.8	5.8	5.8	5.8	5.8	5.8	5.8	5.8	5.8	5.8	5.8	5.8	5.8	5.8	5.8	5.8	5.8	5.8	5.8	5.8	5.8	5.8	5.8	5.8	5.8	5.8	5.8	5.8	5.8	5.8	5.8	5.8	5.8
	equine	gC/gN	taken as bovine		10.3	10.3	10.3	10.3	10.3	10.3	10.3	10.3	10.3	10.3	10.3	10.3	10.3	10.3	10.3	10.3	10.3	10.3	10.3	10.3	10.3	10.3	10.3	10.3	10.3	10.3	10.3	10.3	10.3	10.3	10.3	10.3	10.3	10.3
	C excreted
	Bovines	ktonC/yr			0	0	0	0	1336.7	675	740.819	0	0	0	2321.02	0	1434.95	1618.21	2921.67	0	4673.91	766.886	367.539	502.553	215.965	600.126	954.111	2448.31	0	794.098	0	707.564	941.537	0	0	0	0	24021
	ovines	ktonC/yr			0	0	0	0	0.711975	0.378847	0.250935	0	0	0	1.80173	0	2.76211	37.4274	51.5988	0	19.3397	0.889111	3.93248	6.73685	9.80647	29.5052	14.1372	25.8023	0	2.74943	0	13.2343	1.41074	0	0	0	0	222.475
	caprines	ktonC/yr			0	0	0	0	12.1111	9.3343	6.82071	0	0	0	77.3176	0	7.60287	35.6267	66.7383	0	243.491	6.88953	14.1647	10.8987	303.282	79.7989	238.583	300.492	0	186.911	0	99.0328	17.797	0	0	0	0	1716.89
	Porcines	ktonC/yr			0	0	0	0	16.2246	8.17467	22.4437	0	0	0	16.612	0	416.531	45.2109	118.124	0	40.4674	8.95726	2.89116	17.7381	3.8236	12.7766	20.0789	43.4455	0	29.1694	0	17.0951	8.09533	0	0	0	0	847.859
	poultry	ktonC/yr			0	0	0	0	26.2496	11.6188	9.86517	0	0	0	15.5438	0	366.218	164.338	285.875	0	67.4093	4.28675	25.0403	30.99	14.0019	70.8838	20.2151	116.363	0	21.886	0	44.9178	44.445	0	0	0	0	1340.15
	equine	ktonC/yr			0	0	0	0	110.641	23.7008	25.4233	0	0	0	113.076	0	48.1767	100.472	87.8295	0	155.388	42.2684	6.10183	82.4342	10.6626	129.385	27.0611	265.555	0	20.9302	0	41.6829	19.6703	0	0	0	0	1310.46
	Total C excreted	ktonC/yr			0	0	0	0	1392	704.507	780.2	0	0	0	2432.3	0	2228.06	1900.81	3444	0	5044.62	787.908	413.567	568.916	546.879	793.09	1247.12	2934.41	0	1034.81	0	881.844	1013.29	0	0	0	0	28148.3
	C/N at the end of the storage
Bovines	C/N manure	gC/gN	MEEM 2010 corrected by Soltner 2009		18.72	18.72	18.72	18.72	18.72	18.72	18.72	18.72	18.72	18.72	18.72	18.72	18.72	18.72	18.72	18.72	18.72	18.72	18.72	18.72	18.72	18.72	18.72	18.72	18.72	18.72	18.72	18.72	18.72	18.72	18.72	18.72	18.72	18.72
	C/N slurrry	gC/gN	MEEM 2010 corrected by Soltner 2009		7.7027	7.7027	7.7027	7.7027	7.7027	7.7027	7.7027	7.7027	7.7027	7.7027	7.7027	7.7027	7.7027	7.7027	7.7027	7.7027	7.7027	7.7027	7.7027	7.7027	7.7027	7.7027	7.7027	7.7027	7.7027	7.7027	7.7027	7.7027	7.7027	7.7027	7.7027	7.7027	7.7027	7.7027
	C/N direct excretion at grazing	gC/gN	MEEM 2010 corrected by Soltner 2009		10.3154	10.3154	10.3154	10.3154	10.3154	10.3154	10.3154	10.3154	10.3154	10.3154	10.3154	10.3154	10.3154	10.3154	10.3154	10.3154	10.3154	10.3154	10.3154	10.3154	10.3154	10.3154	10.3154	10.3154	10.3154	10.3154	10.3154	10.3154	10.3154	10.3154	10.3154	10.3154	10.3154	10.3154
Ovines	C/N manure	gC/gN	MEEM 2010 corrected by Soltner 2009		11.6867	11.6867	11.6867	11.6867	11.6867	11.6867	11.6867	11.6867	11.6867	11.6867	11.6867	11.6867	11.6867	11.6867	11.6867	11.6867	11.6867	11.6867	11.6867	11.6867	11.6867	11.6867	11.6867	11.6867	11.6867	11.6867	11.6867	11.6867	11.6867	11.6867	11.6867	11.6867	11.6867	11.6867
	C/N direct excretion at grazing	gC/gN	MEEM 2010 corrected by Soltner 2009		10.7692	10.7692	10.7692	10.7692	10.7692	10.7692	10.7692	10.7692	10.7692	10.7692	10.7692	10.7692	10.7692	10.7692	10.7692	10.7692	10.7692	10.7692	10.7692	10.7692	10.7692	10.7692	10.7692	10.7692	10.7692	10.7692	10.7692	10.7692	10.7692	10.7692	10.7692	10.7692	10.7692	10.7692
Caprines	C/N manure	gC/gN	MEEM 2010 corrected by Soltner 2009		11.6867	11.6867	11.6867	11.6867	11.6867	11.6867	11.6867	11.6867	11.6867	11.6867	11.6867	11.6867	11.6867	11.6867	11.6867	11.6867	11.6867	11.6867	11.6867	11.6867	11.6867	11.6867	11.6867	11.6867	11.6867	11.6867	11.6867	11.6867	11.6867	11.6867	11.6867	11.6867	11.6867	11.6867
	C/N direct excretion at grazing	gC/gN	MEEM 2010 corrected by Soltner 2009		10.7692	10.7692	10.7692	10.7692	10.7692	10.7692	10.7692	10.7692	10.7692	10.7692	10.7692	10.7692	10.7692	10.7692	10.7692	10.7692	10.7692	10.7692	10.7692	10.7692	10.7692	10.7692	10.7692	10.7692	10.7692	10.7692	10.7692	10.7692	10.7692	10.7692	10.7692	10.7692	10.7692	10.7692
Porcines	C/N manure	gC/gN	MEEM 2010 corrected by Soltner 2009		22.8	22.8	22.8	22.8	22.8	22.8	22.8	22.8	22.8	22.8	22.8	22.8	22.8	22.8	22.8	22.8	22.8	22.8	22.8	22.8	22.8	22.8	22.8	22.8	22.8	22.8	22.8	22.8	22.8	22.8	22.8	22.8	22.8	22.8
	C/N slurry	gC/gN	MEEM 2010 corrected by Soltner 2009		4.46237	4.46237	4.46237	4.46237	4.46237	4.46237	4.46237	4.46237	4.46237	4.46237	4.46237	4.46237	4.46237	4.46237	4.46237	4.46237	4.46237	4.46237	4.46237	4.46237	4.46237	4.46237	4.46237	4.46237	4.46237	4.46237	4.46237	4.46237	4.46237	4.46237	4.46237	4.46237	4.46237	4.46237
Poultry	C/N manure	gC/gN	MEEM 2010 corrected by Soltner 2009		9.16667	9.16667	9.16667	9.16667	9.16667	9.16667	9.16667	9.16667	9.16667	9.16667	9.16667	9.16667	9.16667	9.16667	9.16667	9.16667	9.16667	9.16667	9.16667	9.16667	9.16667	9.16667	9.16667	9.16667	9.16667	9.16667	9.16667	9.16667	9.16667	9.16667	9.16667	9.16667	9.16667	9.16667
	C/N slurry	gC/gN	MEEM 2010 corrected by Soltner 2009		5.76923	5.76923	5.76923	5.76923	5.76923	5.76923	5.76923	5.76923	5.76923	5.76923	5.76923	5.76923	5.76923	5.76923	5.76923	5.76923	5.76923	5.76923	5.76923	5.76923	5.76923	5.76923	5.76923	5.76923	5.76923	5.76923	5.76923	5.76923	5.76923	5.76923	5.76923	5.76923	5.76923	5.76923
Equine	C/N manure	gC/gN	Taken as bovine		18.72	18.72	18.72	18.72	18.72	18.72	18.72	18.72	18.72	18.72	18.72	18.72	18.72	18.72	18.72	18.72	18.72	18.72	18.72	18.72	18.72	18.72	18.72	18.72	18.72	18.72	18.72	18.72	18.72	18.72	18.72	18.72	18.72	18.72
	C/N slurry	gC/gN	Taken as bovine		10.3154	10.3154	10.3154	10.3154	10.3154	10.3154	10.3154	10.3154	10.3154	10.3154	10.3154	10.3154	10.3154	10.3154	10.3154	10.3154	10.3154	10.3154	10.3154	10.3154	10.3154	10.3154	10.3154	10.3154	10.3154	10.3154	10.3154	10.3154	10.3154	10.3154	10.3154	10.3154	10.3154	10.3154
	C at the end of the storage
Bovines	Manure	ktC/yr			0	0	0	0	419.579	238.641	235.62	0	0	0	795.13	0	414.353	586.219	1006.31	0	1416.89	237.694	116.672	156.329	85.3353	185.065	373.513	964.284	0	305.969	0	273.696	295.055	0	0	0	0	8106.36
	Slurry	ktC/yr			0	0	0	0	51.3007	65.4897	34.3512	0	0	0	351.484	0	162.849	101.075	211.002	0	421.245	212.644	70.3882	77.6825	29.198	85.3481	45.9709	166.486	0	65.633	0	56.1439	96.974	0	0	0	0	2305.27
	grazing excretion	ktC/yr			0	0	0	0	714.855	305.008	388.801	0	0	0	989.641	0	732.379	754.333	1398.55	0	2387.87	287.798	156.57	230.26	82.2561	281.791	424.066	1048.65	0	339.467	0	302.925	462.344	0	0	0	0	11287.6
Ovines	manure	ktC/yr			0	0	0	0	0.347539	0.184928	0.12249	0	0	0	0.942305	0	1.7335	16.9646	23.388	0	12.5297	0.465005	2.05669	3.52338	4.44495	15.4312	11.4231	20.2812	0	1.85538	0	9.88238	0.984665	0	0	0	0	126.561
	grazing excretion	ktC/yr			0	0	0	0	0.634197	0.33746	0.223522	0	0	0	1.53357	0	2.02297	34.8204	48.0047	0	13.7192	0.756783	3.3472	5.73419	9.12342	25.1138	7.45799	14.2562	0	1.86626	0	7.90271	0.920496	0	0	0	0	177.775
Caprines	manure	ktC/yr			0	0	0	0	5.91186	9.76368	3.32942	0	0	0	40.4372	0	7.95261	43.9494	80.0978	0	226.973	3.60323	15.8041	12.16	137.468	89.0343	240.033	288.915	0	151.725	0	85.1371	15.7154	0	0	0	0	1458.01
	grazing excretion	ktC/yr			0	0	0	0	10.7881	2.40199	6.0756	0	0	0	65.8103	0	1.95645	1.57875	5.49063	0	94.13	5.86414	2.52347	1.94161	282.157	14.2163	72.2093	106.165	0	97.8121	0	46.4346	7.87289	0	0	0	0	825.429
Porcines	Fumiers (ktC/yr)	ktC/yr			0	0	0	0	12.4214	8.34463	17.1828	0	0	0	12.7181	0	106.298	32.9735	88.4442	0	26.6663	6.85762	2.95127	18.1069	9.75774e-08	13.0422	15.4193	34.81	0	15.24	0	10.7796	5.61882	0	0	0	0	427.875
	Lisiers (ktC/yr)	ktC/yr			0	0	0	0	8.1606	3.5243	11.2887	0	0	0	8.35549	0	269.365	23.2018	59.9743	0	21.5693	4.5053	1.24645	7.64731	2.74741	5.5083	10.086	21.4161	0	16.6684	0	9.24834	4.23477	0	0	0	0	488.748
Poultry	Manure	ktC/yr			0	0	0	0	1.12843	0.499474	0.424089	0	0	0	0.668207	0	15.7432	7.06463	12.2893	0	2.89783	0.184281	1.07645	1.33222	0.601923	3.04719	0.869018	11.8304	0	0.940845	0	1.93095	1.91063	0	0	0	0	64.439
	Slurry	ktC/yr			0	0	0	0	15.0278	6.65171	5.64778	0	0	0	8.8988	0	209.658	94.0828	163.662	0	38.5916	2.45415	14.3355	17.7417	8.01607	40.5807	11.5731	56.5136	0	12.5296	0	25.7153	25.4446	0	0	0	0	757.126
Equine	Manure	ktC/yr			0	0	0	0	27.6502	6.67129	6.43779	0	0	0	30.8415	0	11.0758	28.9785	24.085	0	37.504	10.4306	1.54215	20.4159	3.35436	31.7666	8.43444	83.2718	0	6.42068	0	12.8371	4.90772	0	0	0	0	356.625
	Slurry	ktC/yr			0	0	0	0	2.07275	1.12247	0.575447	0	0	0	8.35877	0	2.66889	3.06338	3.09627	0	6.83622	5.72112	0.570428	6.22003	0.70368	8.98213	0.636463	8.81472	0	0.844431	0	1.6145	0.988944	0	0	0	0	62.8907
	grazing excretion	ktC/yr			0	0	0	0	0	0	0	0	0	0	0	0	0	0	0	0	0	0	0	0	0	0	0	0	0	0	0	0	0	0	0	0	0	0
	C at the end of the storage	ktC/yr
	total C excreted indoor	ktC/yr			0	0	0	0	543.601	340.893	314.98	0	0	0	1257.83	0	1201.7	937.573	1672.35	0	2211.7	484.559	226.643	321.159	271.869	477.806	717.958	1656.62	0	577.827	0	486.985	451.835	0	0	0	0	14153.9
	total C excreted outdoor	ktC/yr			0	0	0	0	726.277	307.747	395.1	0	0	0	1056.98	0	736.358	790.732	1452.05	0	2495.72	294.418	162.441	237.936	373.536	321.121	503.734	1169.07	0	439.146	0	357.262	471.137	0	0	0	0	12290.8
	C inputs
	to arable land	ktC/yr			0	0	0	0	719.676	410.991	482.992	0	0	0	1423.5	0	1733.78	1372.76	2503.59	0	2866.03	517.284	231.544	362.891	355.513	541.725	900.007	2169.3	0	689.007	0	623.299	554.967	0	0	0	0	18458.9
	to permanent grassland	ktC/yr			0	0	0	0	550.201	237.65	227.089	0	0	0	891.319	0	204.281	355.54	620.809	0	1841.4	261.694	157.54	196.204	289.893	257.202	321.685	656.395	0	327.965	0	220.949	368.005	0	0	0	0	7985.82
	Humification coefficient of manure
	Bovine manure	yr-1	Justes et al. 2009		0.52	0.46	0.46	0.46	0.46	0.46	0.46	0.46	0.46	0.46	0.46	0.46	0.46	0.46	0.46	0.46	0.46	0.46	0.46	0.46	0.46	0.46	0.46	0.46	0.46	0.46	0.46	0.46	0.46	0.46	0.46	0.46	0.46	0.461818
	Bovines slurry	yr-1	Justes et al. 2009		0.15	0.26	0.26	0.26	0.26	0.26	0.26	0.26	0.26	0.26	0.26	0.26	0.26	0.26	0.26	0.26	0.26	0.26	0.26	0.26	0.26	0.26	0.26	0.26	0.26	0.26	0.26	0.26	0.26	0.26	0.26	0.26	0.26	0.256667
	Ovines and Caprines Manure	yr-1	Justes et al. 2009		0.61	0.61	0.61	0.61	0.61	0.61	0.61	0.61	0.61	0.61	0.61	0.61	0.61	0.61	0.61	0.61	0.61	0.61	0.61	0.61	0.61	0.61	0.61	0.61	0.61	0.61	0.61	0.61	0.61	0.61	0.61	0.61	0.61	0.61
	Porcines manure	yr-1	Justes et al. 2009		0.53	0.15	0.15	0.15	0.15	0.15	0.15	0.15	0.15	0.15	0.15	0.15	0.15	0.15	0.15	0.15	0.15	0.15	0.15	0.15	0.15	0.15	0.15	0.15	0.15	0.15	0.15	0.15	0.15	0.15	0.15	0.15	0.15	0.161515
	Porcines slurry	yr-1	Justes et al. 2009		0.15	0.1	0.1	0.1	0.1	0.1	0.1	0.1	0.1	0.1	0.1	0.1	0.1	0.1	0.1	0.1	0.1	0.1	0.1	0.1	0.1	0.1	0.1	0.1	0.1	0.1	0.1	0.1	0.1	0.1	0.1	0.1	0.1	0.101515
	poultry slurry	yr-1	Justes et al. 2009		0.15	0.2	0.2	0.2	0.2	0.2	0.2	0.2	0.2	0.2	0.2	0.2	0.2	0.2	0.2	0.2	0.2	0.2	0.2	0.2	0.2	0.2	0.2	0.2	0.2	0.2	0.2	0.2	0.2	0.2	0.2	0.2	0.2	0.198485
	horse manure	yr-1	Justes et al. 2009		0.52	0.52	0.52	0.52	0.52	0.52	0.52	0.52	0.52	0.52	0.52	0.52	0.52	0.52	0.52	0.52	0.52	0.52	0.52	0.52	0.52	0.52	0.52	0.52	0.52	0.52	0.52	0.52	0.52	0.52	0.52	0.52	0.52	0.52
	Other manure	yr-1	Bertora et al. (2009)		0.46	0.46	0.46	0.46	0.46	0.46	0.46	0.46	0.46	0.46	0.46	0.46	0.46	0.46	0.46	0.46	0.46	0.46	0.46	0.46	0.46	0.46	0.46	0.46	0.46	0.46	0.46	0.46	0.46	0.46	0.46	0.46	0.46	0.46
	direct grazing exrection	yr-1	Bertora et al. (2009)		0.26	0.26	0.26	0.26	0.26	0.26	0.26	0.26	0.26	0.26	0.26	0.26	0.26	0.26	0.26	0.26	0.26	0.26	0.26	0.26	0.26	0.26	0.26	0.26	0.26	0.26	0.26	0.26	0.26	0.26	0.26	0.26	0.26	0.26
	efficient C inputs
	indoor	ktC/yr			0	0	0	0	220.644	137.229	125.473	0	0	0	493.561	0	333.098	367.145	642.601	0	929.446	172.061	87.1515	113.695	136.204	189.7	344.498	713.125	0	259.474	0	209.188	179.28	0	0	0	0	5653.57
	outdoor	ktC/yr			0	0	0	0	188.832	80.0143	102.726	0	0	0	274.816	0	191.453	205.59	377.533	0	648.888	76.5488	42.2347	61.8634	97.1195	83.4916	130.971	303.958	0	114.178	0	92.8882	122.496	0	0	0	0	3195.6
	Final efficient C inputs derived from manure to arable land	ktC/yr			0	0	0	0	266.424	155.454	169.156	0	0	0	536.634	0	471.438	480.295	858.724	0	1099.57	180.569	88.4258	124.545	157.951	206.319	391.831	846.42	0	288.381	0	244.63	206.095	0	0	0	0	6772.86
	Final efficient C inputs derived from manure to permanent grassland	ktC/yr			0	0	0	0	143.052	61.7889	59.0431	0	0	0	231.743	0	53.1129	92.4404	161.41	0	478.763	68.0405	40.9604	51.013	75.3721	66.8726	83.6381	170.663	0	85.271	0	57.4466	95.6814	0	0	0	0	2076.31
	Energy consumption
	Imported feed	kgC-CO2/tN feed	Doublet et al., 2011		1339	1339	1339	1339	1339	1339	1339	1339	1339	1339	1339	1339	1339	1339	1339	1339	1339	1339	1339	1339	1339	1339	1339	1339	1339	1339	1339	1339	1339	1339	1339	1339	1339
	Fertilizer N	kgC-CO2/t N fert	Doublet et al., 2011		1118	1118	1118	1118	1118	1118	1118	1118	1118	1118	1118	1118	1118	1118	1118	1118	1118	1118	1118	1118	1118	1118	1118	1118	1118	1118	1118	1118	1118	1118	1118	1118	1118
	Fertilizer P	kgC-CO2/t P fert	Doublet et al., 2011		460	460	460	460	460	460	460	460	460	460	460	460	460	460	460	460	460	460	460	460	460	460	460	460	460	460	460	460	460	460	460	460	460
	Machinery	kgC-CO2/ha UAA	Doublet et al., 2011		26	26	26	26	26	26	26	26	26	26	26	26	26	26	26	26	26	26	26	26	26	26	26	26	26	26	26	26	26	26	26	26	26	26
	Mechanization crop production	kgC-CO2/ha arable land	Doublet et al., 2011		77	77	77	77	77	77	77	77	77	77	77	77	77	77	77	77	77	77	77	77	77	77	77	77	77	77	77	77	77	77	77	77	77
	Mechanization grass production	kgC-CO2/ha perm grassland	Doublet et al., 2011		55	55	55	55	55	55	55	55	55	55	55	55	55	55	55	55	55	55	55	55	55	55	55	55	55	55	55	55	55	55	55	55	55
	Mechanization livestock	kgC-CO2/UGB	Doublet et al., 2011		56	56	56	56	56	56	56	56	56	56	56	56	56	56	56	56	56	56	56	56	56	56	56	56	56	56	56	56	56	56	56	56	56

## Sheet: GRAFS
territoires fonctionnels 2006		2014	2014	2014	2014	2014	2014	2014	2014	2014	2014	2014	2014	2014	2014	2014	2014	2014	2014	2014	2014	2014	2014	2014	2014	2014	2014	2014	2014	2014	2014	2014	2014	2014		2014
		Ile de France	Eure	Eure-et-Loir	Picardie	Calvados-Orne	Seine Maritime	Manche	Nord Pas de Calais	Champ-Ard-Yonne	Bourgogne	Grande Lorraine	Alsace	Bretagne	Vendée-Charente	Loire aval	Loire Centrale	Loire Amont	Grand Jura	Savoie	Ain-Rhône	Alpes	Isère-Drôme Ardèche	Aveyron-Lozère	Garonne	Gironde	Pyrénées occidentales	Landes	Dor-Lot	Cantal-Corrèze	Grand Marseille	Côte d'Azur	Gard-Hérault	Pyrénées Orientales		TOTAL France
GRAFS-NITROGEN
surface area	km²	12055.3	6027.83	5966.85	19468	11757.8	6328.78	6050.85	12456.6	26930	15060.4	29060.6	8312.71	27504.9	19715.7	31603.8	40658.2	51818.6	10924.7	11132.3	8982.12	12695.2	20010	13941.4	38803.1	10137.2	12196.8	9361.62	14437.4	11674.2	8854.23	10313.6	12090.3	4167.3		540498
Population	M hab	13.77	0.71	0.5	2.16	1.11	1.35	0.55	4.4	1.61	0.78	2.82	2.17	4.1	2.08	4.2	3.03	3.66	1.08	1.52	2.93	0.38	2.64	0.43	3.91	1.9	1.07	0.52	0.72	0.44	3.01	2.58	2.33	0.59		75.05
Total consumption (INSEE)	ktN/an	92.259	4.757	3.35	14.472	7.437	9.045	3.685	29.48	10.787	5.226	18.894	14.539	27.47	13.936	28.14	20.301	24.522	7.236	10.184	19.631	2.546	17.688	2.881	26.197	12.73	7.169	3.484	4.824	2.948	20.167	17.286	15.611	3.953		502.835
	kgN/cap/yr	6.7	6.7	6.7	6.7	6.7	6.7	6.7	6.7	6.7	6.7	6.7	6.7	6.7	6.7	6.7	6.7	6.7	6.7	6.7	6.7	6.7	6.7	6.7	6.7	6.7	6.7	6.7	6.7	6.7	6.7	6.7	6.7	6.7
Cons of vegetal protein	ktN/yr	30.9825	1.5975	1.125	4.86	2.4975	3.0375	1.2375	9.9	3.6225	1.755	6.345	4.8825	9.225	4.68	9.45	6.8175	8.235	2.43	3.42	6.5925	0.855	5.94	0.9675	8.7975	4.275	2.4075	1.17	1.62	0.99	6.7725	5.805	5.2425	1.3275		168.863
Cons of edible animal protein (excluding fish)	ktN/yr	60.588	3.124	2.2	9.504	4.884	5.94	2.42	19.36	7.084	3.432	12.408	9.548	18.04	9.152	18.48	13.332	16.104	4.752	6.688	12.892	1.672	11.616	1.892	17.204	8.36	4.708	2.288	3.168	1.936	13.244	11.352	10.252	2.596		330.22
Cons of dairy prdcts	ktN/yr	23.6844	1.2212	0.86	3.7152	1.9092	2.322	0.946	7.568	2.7692	1.3416	4.8504	3.7324	7.052	3.5776	7.224	5.2116	6.2952	1.8576	2.6144	5.0396	0.6536	4.5408	0.7396	6.7252	3.268	1.8404	0.8944	1.2384	0.7568	5.1772	4.4376	4.0076	1.0148		129.086
Cons of edible meat	ktN/yr	38.6937	1.9951	1.405	6.0696	3.1191	3.7935	1.5455	12.364	4.5241	2.1918	7.9242	6.0977	11.521	5.8448	11.802	8.5143	10.2846	3.0348	4.2712	8.2333	1.0678	7.4184	1.2083	10.9871	5.339	3.0067	1.4612	2.0232	1.2364	8.4581	7.2498	6.5473	1.6579		210.891
Cons of edible and non edible meat	ktN/yr	85.986	4.43356	3.12222	13.488	6.93133	8.43	3.43444	27.4756	10.0536	4.87067	17.6093	13.5504	25.6022	12.9884	26.2267	18.9207	22.8547	6.744	9.49156	18.2962	2.37289	16.4853	2.68511	24.4158	11.8644	6.68156	3.24711	4.496	2.74756	18.7958	16.1107	14.5496	3.68422		468.646
Cons of animal protein (excluding fish) including losses at the culling stage	ktN/yr	109.67	5.65476	3.98222	17.2032	8.84053	10.752	4.38044	35.0436	12.8228	6.21227	22.4597	17.2828	32.6542	16.566	33.4507	24.1323	29.1499	8.6016	12.106	23.3358	3.02649	21.0261	3.42471	31.141	15.1324	8.52196	4.14151	5.7344	3.50436	23.973	20.5483	18.5572	4.69902		597.732
Agricultural surfaces
Total utilized agricultural area (UAA)	ha	572057	393517	454242	1.34162e+06	836467	406137	456313	828742	1.63512e+06	761377	1.41389e+06	316164	1.67357e+06	1.20081e+06	2.14103e+06	2.39553e+06	2.93726e+06	458051	244092	381733	399978	567783	782923	1.89944e+06	127285	653845	205144	561345	586944	185031	178052	202677	92462.6		2.72906e+07
Permanent Grassland	ha	0	6.75595e-06	0	0	184019	64783	121181	0	0	0	394553	0	156188	173971	351312	0	1.48589e+06	329232	225911	181873	259385	263988	410276	364214	0	297637	0	223174	415584	0	0	0	0		5.90317e+06
Cropland	ha	572057	393517	454242	1.34162e+06	652448	341354	335132	828742	1.63512e+06	761377	1.01934e+06	316164	1.51738e+06	1.02684e+06	1.78972e+06	2.39553e+06	1.45138e+06	128820	18181.9	199860	140593	303795	372647	1.53523e+06	127285	356207	205144	338171	171360	185031	178052	202677	92462.6		2.13875e+07
Livestock breeding
LU	M LU	0	0	0	0	1.77134	0.860054	0.96631	0	0	0	2.99413	0	3.54404	2.5429	4.53394	0	6.22009	0.969991	0.516902	0.808376	0.847013	1.20236	1.65795	4.02235	0	1.38461	0	1.18873	1.24294	0	0	0	0		37.274
LU/haUAA	LU/ha	0	0	0	0	2.11765	2.11765	2.11765	0	0	0	2.11765	0	2.11765	2.11765	2.11765	0	2.11765	2.11765	2.11765	2.11765	2.11765	2.11765	2.11765	2.11765	0	2.11765	0	2.11765	2.11765	0	0	0	0		1.36582
Edible and non-edible animal production	ktN/yr	0	0	0	0	29.6036	14.7145	17.5507	0	0	0	46.4236	0	89.3548	46.9538	89.2511	0	54.2691	16.4598	9.57427	13.0952	7.85304	17.4025	14.651	51.3565	0	13.6712	0	16.9986	8.63223	0	0	0	0		557.816
Edible animal production	ktN/yr	0	0	0	0	21.9372	10.6809	13.8151	0	0	0	34.9192	0	61.9835	28.7379	58.8433	0	34.7609	14.1542	7.5898	9.84519	4.77778	11.7139	9.62752	32.46	0	8.95504	0	10.1567	6.36757	0	0	0	0		381.326
Ingestion	ktN/yr	0	0	0	0	180.168	87.8191	99.687	0	0	0	300.924	0	390.598	263.1	474.636	0	582.977	98.9091	53.5109	81.8071	79.8491	119.603	155.577	393.256	0	131.363	0	118.041	114.282	0	0	0	0		3726.11
Total excretion	ktN/yr	0	0	0	0	150.564	73.1046	82.1363	0	0	0	254.501	0	301.243	216.146	385.385	0	528.708	82.4493	43.9366	68.7119	71.9961	102.201	140.926	341.9	0	117.692	0	101.042	105.65	0	0	0	0		3168.29
Maximum ingestion of grass	ktN/yr	0	0	0	0	152.359	74.368	80.5955	0	0	0	265.433	0	158.171	193.752	335.346	0	532.602	82.8148	40.8046	62.8997	74.4053	93.1179	140.454	332.333	0	114.325	0	96.2953	99.3666	0	0	0	0		2929.44
Ingestion from grassland	ktN/yr		0			38.8842	19.3016	26.4499				82.9128		18.6265	31.987	50.8697		222.747	39.5875	20.3641	26.4053	20.3138	25.1434	35.8059	48.6912	0	28.0167		26.8387	51.56	0	0	0	0		814.505
[truncated: 113 more rows]

## Sheet: Sources
	Cited sources
[truncated: 29 more rows]
